# Supplementary material
Source: publisher figshare collection journal article supplement (https://gsapubs.figshare.com/ndownloader/files/38162973)
Supplement: Supplementary file 1 [file 38162973]

## Sheet: AROM1
Filtered data
Analysis_name	bias_corr_samples_Pb207_Pb206	bias_corr_samples_Pb207_Pb206_err	bias_corr_samples_Pb207_U235	bias_corr_samples_Pb207_U235_err	bias_corr_samples_Pb206_U238	bias_corr_samples_Pb206_U238_err	rho	bias_corr_samples_Pb208_Th232	bias_corr_samples_Pb208_Th232_err	samples_Pb206_U238_age,	samples_Pb206_U238_age_err	samples_Pb207_U235_age	samples_Pb207_U235_age_err	samples_Pb207_Pb206_age	samples_Pb207_Pb206_age_err	samples_Pb208_Th232_age	samples_Pb208_Th232_age_err	discordance_Pb206U238_Pb207Pb206	discordance_Pb206U238_Pb207U235	best_age	best_age_err
AROM1-070	0.0595311	5.7027	0.529656	6.4932	0.0644662	3.74263	0.486555	0.0183875	3.98768	402.73	14.6115	431.582	22.833	586.574	123.734	368.278	14.558	31.342	6.68512	402.73	14.6115
AROM1-080	0.0820762	3.1691	1.09865	5.82991	0.096999	5.17197	0.840636	0.0201215	7.73858	596.798	29.4808	752.698	30.9989	1247.34	62.0461	402.662	30.8756	52.1542	20.7122	596.798	29.4808
AROM1-159	0.0746963	6.07833	1.47409	8.48363	0.142936	5.94088	0.697615	0.0478686	6.64159	861.242	47.8956	919.807	51.3677	1060.34	122.318	945.088	61.4172	18.777	6.36716	861.242	47.8956
AROM1-008	0.0757553	4.34944	1.89379	7.32597	0.181091	5.6533	0.805392	0.0503804	4.51815	1072.93	55.8784	1078.91	48.7184	1088.61	87.1563	993.479	43.8491	1.44022	0.554385	1088.61	87.1563
AROM1-107	0.0759069	4.45261	1.77372	6.35744	0.16933	4.44447	0.713926	0.0539851	7.16821	1008.42	41.4898	1035.88	41.3023	1092.62	89.1704	1062.72	74.3469	7.7059	2.65122	1092.62	89.1704
AROM1-174	0.0760166	4.24155	1.77163	5.57576	0.168869	3.77769	0.649685	0.0541869	5.87678	1005.88	35.1831	1035.12	36.2039	1095.51	84.907	1066.59	61.1487	8.18142	2.82481	1095.51	84.907
AROM1-081	0.0765295	4.86921	2.02568	6.87149	0.19181	5.1296	0.706721	0.0512825	8.09128	1131.17	53.2202	1124.17	46.745	1108.96	97.2764	1010.83	79.9354	-2.00346	-0.623345	1108.96	97.2764
AROM1-050	0.0772079	7.46283	2.24024	11.0887	0.210176	8.22309	0.739632	0.0546362	6.39634	1229.76	92.0699	1193.73	77.9973	1126.56	148.703	1075.21	67.0879	-9.15988	-3.01772	1126.56	148.703
AROM1-139	0.0772854	5.50109	1.67394	7.99064	0.156897	5.81049	0.725294	0.0525337	6.37178	939.512	50.7997	998.682	50.8349	1128.56	109.581	1034.87	64.3825	16.7515	5.92487	1128.56	109.581
AROM1-068	0.0776259	3.93285	1.93915	5.31494	0.181	3.83575	0.674317	0.0526392	4.87589	1072.43	37.8967	1094.7	35.6202	1137.31	78.2406	1036.9	49.3432	5.70473	2.03434	1137.31	78.2406
AROM1-160	0.0779998	6.372	1.91705	8.44662	0.178015	5.56877	0.656439	0.0553144	8.54761	1056.12	54.2493	1087.04	56.4221	1146.87	126.587	1088.2	90.759	7.91247	2.84434	1146.87	126.587
AROM1-156	0.0783056	5.33247	1.97713	7.73713	0.182877	5.62994	0.724573	0.0569872	7.23892	1082.67	56.1115	1107.74	52.2192	1154.64	105.815	1120.21	79.0396	6.2329	2.26341	1154.64	105.815
AROM1-122	0.0820889	3.62651	2.16773	5.83735	0.191327	4.49229	0.783733	0.0552758	5.70934	1128.56	46.5092	1170.75	40.582	1247.64	70.9984	1087.46	60.5368	9.5442	3.60365	1247.64	70.9984
AROM1-086	0.0828541	5.81253	2.02012	8.19402	0.176687	6.14509	0.706201	0.055182	8.54011	1048.85	59.4843	1122.3	55.7077	1265.78	113.501	1085.66	90.473	17.1382	6.54451	1265.78	113.501
AROM1-054	0.0858134	5.5927	2.8338	8.09037	0.239221	5.87627	0.722598	0.0641093	5.27685	1382.65	73.1289	1364.53	60.7935	1333.98	108.163	1255.95	64.3598	-3.64785	-1.32759	1333.98	108.163
AROM1-092	0.0860119	5.48994	2.19958	8.9514	0.185325	7.22057	0.79002	0.0577633	8.38687	1096	72.7788	1180.91	62.5629	1338.45	106.11	1135.05	92.7843	18.1141	7.19014	1338.45	106.11
AROM1-171	0.0861871	13.9844	2.5359	20.2616	0.21318	14.7017	0.723629	0.0669051	13.4649	1245.74	166.573	1282.4	148.6	1342.38	270.142	1308.99	171.392	7.19932	2.85847	1342.38	270.142
AROM1-033	0.0865785	5.8201	2.31807	10.0573	0.193917	7.65929	0.81746	0.0624814	6.67023	1142.56	80.1995	1217.83	71.4613	1351.13	112.293	1225	79.4396	15.4367	6.18087	1351.13	112.293
AROM1-096	0.0868055	3.53509	2.79726	5.26256	0.233529	3.88304	0.74079	0.0657419	6.98306	1352.97	47.3902	1354.8	39.3828	1356.18	68.1581	1286.94	87.2543	0.237128	0.135681	1356.18	68.1581
AROM1-155	0.0871221	4.41193	2.62245	6.55396	0.218019	4.87417	0.739499	0.0642104	5.0966	1271.4	56.2431	1306.95	48.2131	1363.2	84.9815	1257.87	62.2502	6.73415	2.7203	1363.2	84.9815
AROM1-115	0.0872653	10.2347	2.47093	14.6667	0.205171	10.4613	0.716281	0.0654602	9.41148	1203.04	114.82	1263.56	106.405	1366.36	197.052	1281.59	117.212	11.9528	4.79	1366.36	197.052
AROM1-069	0.087341	4.64177	2.74714	7.04275	0.227898	5.47595	0.752486	0.062727	6.51706	1323.47	65.5195	1341.31	52.4734	1368.03	89.3488	1229.68	77.8997	3.25692	1.33007	1368.03	89.3488
AROM1-040	0.087347	6.14291	2.83837	11.1029	0.235361	8.73545	0.83436	0.0648563	5.4384	1362.53	107.296	1365.74	83.5542	1368.16	118.242	1270.13	67.0605	0.411334	0.234737	1368.16	118.242
AROM1-037	0.0875045	3.24143	2.47081	8.66494	0.204509	6.88939	0.938402	0.0611613	4.24617	1199.5	75.4088	1263.53	62.7127	1371.63	62.3629	1199.88	49.5266	12.5492	5.06751	1371.63	62.3629
AROM1-083	0.0875793	5.24054	2.65163	7.12306	0.219405	5.1068	0.678389	0.0693849	6.77053	1278.73	59.235	1315.1	52.5667	1373.27	100.802	1355.91	88.9864	6.88425	2.76528	1373.27	100.802
AROM1-142	0.087689	5.04373	2.56862	7.65882	0.212184	5.69708	0.752586	0.0652957	5.73039	1240.44	64.2879	1291.75	56.0315	1375.68	96.9837	1278.47	71.1175	9.83039	3.97174	1375.68	96.9837
AROM1-104	0.0877063	5.21972	2.81591	7.67259	0.232663	5.54843	0.732993	0.0651078	7.8627	1348.44	67.5129	1359.78	57.5516	1376.06	100.363	1274.91	97.3802	2.00713	0.83415	1376.06	100.363
AROM1-161	0.0877143	5.24129	2.63851	7.99834	0.217876	6.06387	0.755376	0.0642903	5.10369	1270.64	69.9345	1311.44	58.9593	1376.23	100.775	1259.39	62.41	7.67251	3.11105	1376.23	100.775
AROM1-005	0.0877565	4.56349	2.60704	8.06055	0.215212	6.43075	0.824742	0.0637132	6.16105	1256.53	73.4198	1302.62	59.222	1377.16	87.7315	1248.42	74.7269	8.75952	3.53865	1377.16	87.7315
AROM1-133	0.0879437	3.56737	2.63006	5.00146	0.216653	3.51162	0.700896	0.062027	5.18255	1264.16	40.3116	1309.08	36.8103	1381.25	68.5427	1216.36	61.2719	8.477	3.43123	1381.25	68.5427
AROM1-077	0.0879837	4.12281	2.32165	6.4017	0.19121	5.32372	0.767677	0.0622621	5.44429	1127.93	55.0892	1218.93	45.463	1382.13	79.2054	1220.83	64.6014	18.3921	7.46582	1382.13	79.2054
AROM1-007	0.0885553	3.93168	2.70653	7.28568	0.221404	5.90174	0.842519	0.0653148	4.15978	1289.29	68.9669	1330.25	54.0699	1394.56	75.4048	1278.83	51.6146	7.54859	3.07905	1394.56	75.4048
AROM1-043	0.0885782	5.07612	2.98632	9.78425	0.244192	7.79314	0.857033	0.0704326	4.3092	1408.46	98.6073	1404.14	74.5592	1395.05	97.3472	1375.7	57.3908	-0.960633	-0.307206	1395.05	97.3472
AROM1-164	0.088679	8.53082	2.67459	12.8888	0.218484	9.72204	0.749624	0.0624614	7.20058	1273.86	112.388	1321.46	95.5364	1397.24	163.551	1224.62	85.7435	8.8301	3.60239	1397.24	163.551
AROM1-147	0.0887106	3.07392	2.49699	5.35155	0.203883	4.14518	0.819826	0.0634831	4.69134	1196.14	45.2549	1271.16	38.8189	1397.92	58.9269	1244.05	56.6823	14.4339	5.90134	1397.92	58.9269
AROM1-163	0.088778	5.0907	2.74962	7.33485	0.224353	5.30594	0.719942	0.0660674	5.65735	1304.84	62.6787	1341.99	54.6671	1399.37	97.569	1293.11	70.9892	6.75562	2.76811	1399.37	97.569
AROM1-018	0.0890091	11.2787	2.65314	16.9296	0.215899	12.3303	0.74597	0.0676272	13.161	1260.17	141.161	1315.52	125.48	1404.36	216.022	1322.66	169.208	10.267	4.20715	1404.36	216.022
AROM1-165	0.0892597	7.7201	2.86726	10.5974	0.232702	7.3401	0.685097	0.0688013	5.30783	1348.64	89.3285	1373.35	79.9444	1409.74	147.755	1344.88	69.1789	4.33373	1.79907	1409.74	147.755
AROM1-134	0.0894185	4.51742	2.60876	6.88683	0.211352	5.21486	0.754807	0.0642162	5.38654	1236.02	58.6555	1303.11	50.5923	1413.14	86.4191	1257.98	65.803	12.5341	5.14859	1413.14	86.4191
AROM1-113	0.0898202	3.56776	2.90845	5.2481	0.234635	3.7682	0.733544	0.0700353	5.57863	1358.75	46.165	1384.11	39.6744	1421.71	68.1725	1368.2	73.9358	4.42875	1.83261	1421.71	68.1725
AROM1-036	0.0898593	8.91386	2.92603	14.6768	0.235841	10.9015	0.796238	0.0673564	8.29075	1365.04	134.129	1388.67	111.514	1422.54	170.306	1317.53	106.027	4.04221	1.70155	1422.54	170.306
AROM1-041	0.0899884	8.18576	3.01695	13.2551	0.242828	9.973	0.787304	0.0735839	7.05152	1401.38	125.628	1411.91	101.421	1425.28	156.337	1435.12	97.9254	1.67697	0.745901	1425.28	156.337
AROM1-143	0.0900645	6.92947	2.59003	11.4188	0.208308	9.03377	0.794825	0.0660957	10.4213	1219.8	100.404	1297.82	83.838	1426.9	132.314	1293.65	131.015	14.5142	6.01212	1426.9	132.314
AROM1-162	0.0901816	4.6994	2.51339	7.093	0.201883	5.33802	0.749034	0.0606307	5.42898	1185.43	57.8026	1275.91	51.5663	1429.38	89.7024	1189.77	62.8255	17.067	7.0918	1429.38	89.7024
AROM1-088	0.0903586	9.57432	2.93447	13.7306	0.235346	10.0631	0.716958	0.071619	8.15153	1362.45	123.601	1390.85	104.349	1433.12	182.662	1398.09	110.415	4.93083	2.04143	1433.12	182.662
AROM1-094	0.090518	4.42124	2.92936	6.37753	0.234527	4.58322	0.720698	0.0714884	6.47748	1358.18	56.1296	1389.53	48.3127	1436.48	84.3117	1395.63	87.5403	5.45099	2.25602	1436.48	84.3117
AROM1-046	0.0905494	3.45548	3.01542	5.6191	0.24121	4.68128	0.789754	0.0676147	4.36923	1392.99	58.6469	1411.53	42.8717	1437.14	65.8892	1322.42	56.0077	3.0726	1.31352	1437.14	65.8892
AROM1-110	0.090588	4.79199	2.76553	7.34274	0.221221	5.50802	0.757727	0.066523	5.75921	1288.32	64.3222	1346.28	54.8103	1437.96	91.3637	1301.75	72.7378	10.4058	4.30516	1437.96	91.3637
AROM1-031	0.0906117	3.66989	2.73538	7.99565	0.218641	6.46918	0.892335	0.0648872	4.60396	1274.69	74.8244	1338.12	59.52	1438.45	69.9652	1270.72	56.782	11.3847	4.74028	1438.45	69.9652
AROM1-148	0.0907507	5.27293	2.999	7.93554	0.239364	5.75859	0.747637	0.072702	6.69168	1383.39	71.6988	1407.37	60.4985	1441.38	100.487	1418.51	91.8762	4.02313	1.7038	1441.38	100.487
AROM1-059	0.0907892	3.26712	2.99843	5.50428	0.239266	4.40701	0.804801	0.0692295	4.4773	1382.88	54.8517	1407.22	41.9355	1442.18	62.2551	1352.97	58.6787	4.11203	1.72969	1442.18	62.2551
AROM1-029	0.0907934	4.44761	2.68562	8.83836	0.214234	7.02788	0.867154	0.0710349	4.41309	1251.34	79.9376	1324.5	65.4843	1442.27	84.7484	1387.07	59.2463	13.2386	5.52421	1442.27	84.7484
AROM1-011	0.0908302	4.86432	2.76021	8.64158	0.220125	6.92578	0.826919	0.0707721	7.99036	1282.54	80.5517	1344.85	64.4965	1443.04	92.6792	1382.11	107.027	11.1229	4.63349	1443.04	92.6792
AROM1-095	0.0910681	10.606	2.51611	15.951	0.200225	11.9091	0.746923	0.0653167	9.1137	1176.53	128.089	1276.7	116.407	1448.03	201.938	1278.87	113.258	18.7495	7.84589	1448.03	201.938
AROM1-030	0.091166	5.50065	2.91328	9.99787	0.231445	7.8159	0.836861	0.0665237	6.28168	1342.07	94.7025	1385.36	75.7151	1450.07	104.704	1301.76	79.3502	7.44814	3.12523	1450.07	104.704
AROM1-035	0.0912322	8.19391	2.90071	13.4733	0.230281	9.86305	0.796423	0.063014	7.97856	1335.97	119.023	1382.1	102.076	1451.45	155.941	1235.13	95.8221	7.95646	3.33744	1451.45	155.941
AROM1-019	0.0913186	4.91558	2.85614	8.46832	0.226539	6.33904	0.817169	0.0696463	5.78865	1316.33	75.4785	1370.43	63.7711	1453.25	93.5272	1360.85	76.3255	9.42166	3.94724	1453.25	93.5272
AROM1-048	0.0913691	8.26481	2.60183	12.9975	0.206264	10.1444	0.771838	0.0612831	10.1406	1208.88	111.832	1301.16	95.6151	1454.31	157.23	1202.2	118.703	16.8757	7.09159	1454.31	157.23
AROM1-127	0.0915269	4.96581	2.74424	6.99998	0.217224	4.97439	0.704826	0.0670688	6.26776	1267.19	57.2276	1340.53	52.1394	1457.59	94.4279	1312.09	79.7832	13.0627	5.47086	1457.59	94.4279
AROM1-100	0.0921665	4.40315	2.83101	6.15488	0.222599	4.28844	0.698727	0.0680312	11.6322	1295.59	50.3344	1363.79	46.2144	1470.82	83.5785	1330.31	150.319	11.9137	5.00061	1470.82	83.5785
AROM1-015	0.0937125	7.6851	2.96794	12.1816	0.229401	9.05348	0.776602	0.0703987	6.10203	1331.36	108.912	1399.45	92.7752	1502.33	145.266	1375.06	81.2794	11.3804	4.86569	1502.33	145.266
AROM1-137	0.101289	5.19975	3.51026	7.7985	0.251049	5.82691	0.745273	0.0755399	4.70664	1443.88	75.3807	1529.53	61.704	1647.87	96.426	1471.91	66.9258	12.3788	5.59931	1647.87	96.426
AROM1-120	0.10157	7.55525	3.50534	11.1795	0.250058	8.19495	0.737085	0.0761045	8.36619	1438.78	105.685	1528.42	88.543	1653	140.016	1482.52	119.946	12.9597	5.865	1653	140.016
AROM1-176	0.101664	7.19439	4.10722	10.3791	0.292749	7.59482	0.720866	0.086309	5.12774	1655.25	110.882	1655.74	84.9503	1654.72	133.3	1673.28	82.5143	-0.0324713	0.0293539	1654.72	133.3
AROM1-084	0.101923	5.12216	3.77222	6.98809	0.268201	5.03999	0.68141	0.0847843	6.00346	1531.66	68.7126	1586.85	56.1445	1659.44	94.8481	1644.89	95.0624	7.69999	3.47787	1659.44	94.8481
AROM1-061	0.102039	3.98993	4.05668	6.2978	0.288033	4.99355	0.773939	0.081871	4.97663	1631.69	71.9882	1645.64	51.3445	1661.54	73.8628	1590.54	76.2647	1.79641	0.84758	1661.54	73.8628
AROM1-045	0.102505	3.95091	3.94247	6.61591	0.278582	5.51733	0.802712	0.0819293	5.15823	1584.22	77.4984	1622.44	53.6349	1669.97	73.0627	1591.63	79.1052	5.13499	2.35613	1669.97	73.0627
AROM1-057	0.102608	3.15473	3.93901	5.49027	0.278109	4.47096	0.818441	0.0779978	4.39188	1581.83	62.7162	1621.73	44.4885	1671.82	58.3257	1518.05	64.3309	5.3825	2.46036	1671.82	58.3257
AROM1-114	0.102782	3.14195	4.02014	4.48265	0.283416	3.09967	0.713589	0.0868384	5.96521	1608.54	44.1263	1638.28	36.4651	1674.97	58.0664	1683.13	96.5659	3.96566	1.8151	1674.97	58.0664
AROM1-154	0.103622	3.4715	4.15309	5.02726	0.290292	3.67291	0.723335	0.0809416	4.85535	1642.99	53.2703	1664.82	41.1626	1689.98	64.036	1573.17	73.6199	2.78077	1.31121	1689.98	64.036
AROM1-178	0.103806	4.54214	3.67666	6.66844	0.256665	5.05485	0.732594	0.0726981	6.56747	1472.76	66.5563	1566.31	53.2807	1693.25	83.7509	1418.44	90.1626	13.0222	5.97309	1693.25	83.7509
AROM1-093	0.104062	3.90512	4.25866	5.56465	0.296575	4.22657	0.713863	0.0836534	5.41519	1674.3	62.3242	1685.41	45.7889	1697.8	71.9643	1623.81	84.6701	1.38388	0.659058	1697.8	71.9643
AROM1-098	0.104395	4.00227	3.72463	6.13011	0.258558	4.63038	0.757458	0.0764479	7.35105	1482.46	61.3243	1576.68	49.108	1703.69	73.7003	1488.97	105.797	12.9851	5.97559	1703.69	73.7003
AROM1-102	0.104395	4.31851	3.92268	6.39995	0.272297	4.71229	0.738028	0.0791646	6.2765	1552.45	65.016	1618.37	51.8281	1703.69	79.5238	1539.91	93.2775	8.87704	4.0732	1703.69	79.5238
AROM1-034	0.1044	3.2649	3.8152	8.62305	0.264678	6.82545	0.936895	0.0767057	3.91432	1513.73	92.0911	1595.96	69.4818	1703.77	60.1214	1493.81	56.4426	11.1537	5.15197	1703.77	60.1214
AROM1-118	0.104951	4.77758	3.89247	7.09348	0.268735	5.15446	0.739279	0.0867639	6.0622	1534.38	70.3837	1612.12	57.3652	1713.45	87.8705	1681.75	98.0621	10.4509	4.82244	1713.45	87.8705
AROM1-140	0.104986	3.75372	4.03988	5.73205	0.278745	4.24315	0.755908	0.0803576	4.47723	1585.04	59.6268	1642.26	46.6868	1714.07	69.034	1562.25	67.4229	7.52764	3.48445	1714.07	69.034
AROM1-003	0.105256	9.19735	4.09638	13.8288	0.281945	10.1907	0.74683	0.0376278	6.98699	1601.15	144.508	1653.58	113.331	1718.79	169.048	746.582	51.277	6.84425	3.17087	1718.79	169.048
AROM1-166	0.105407	4.54753	3.84405	6.84205	0.264188	5.22554	0.74734	0.0485727	33.9172	1511.23	70.3993	1602.02	55.1854	1721.43	83.5564	958.665	320.083	12.2107	5.66712	1721.43	83.5564
AROM1-175	0.105508	5.66054	4.17624	8.11668	0.286817	5.96266	0.716905	0.0837089	5.59139	1625.61	85.6786	1669.37	66.5888	1723.18	103.984	1624.85	87.4849	5.66234	2.62159	1723.18	103.984
AROM1-051	0.105811	4.78779	3.58607	7.15624	0.245498	5.35196	0.743243	0.0773531	5.85968	1415.22	68.0067	1546.45	56.8783	1728.45	87.8946	1505.96	85.2164	18.1222	8.48631	1728.45	87.8946
AROM1-112	0.105894	3.19675	4.33606	4.93451	0.296709	3.67639	0.76197	0.0878024	5.62306	1674.97	54.2299	1700.25	40.7363	1729.9	58.6756	1701.05	91.9456	3.17526	1.48673	1729.9	58.6756
AROM1-025	0.106103	7.60702	3.78114	12.5455	0.258107	9.51731	0.796077	0.0666016	18.2261	1480.15	125.884	1588.75	101.074	1733.51	139.563	1303.23	231.352	14.6152	6.83546	1733.51	139.563
AROM1-132	0.10679	4.54905	3.97937	6.6509	0.269956	4.85629	0.729505	0.0852072	5.90837	1540.58	66.5491	1630	54.0206	1745.33	83.338	1652.77	93.9842	11.7316	5.48595	1745.33	83.338
AROM1-024	0.106867	4.17945	4.11755	7.58469	0.279061	5.80968	0.837544	0.0809397	6.12685	1586.63	81.7151	1657.79	62.0418	1746.66	76.5543	1573.13	92.9415	9.16211	4.29232	1746.66	76.5543
AROM1-063	0.107054	3.38367	4.40358	6.58661	0.298026	5.75561	0.858103	0.0582533	13.7929	1681.51	85.1933	1713.01	54.5549	1749.86	61.9539	1144.41	154.047	3.90579	1.83903	1749.86	61.9539
AROM1-172	0.107144	6.35964	3.91463	9.31631	0.264723	6.89357	0.730817	0.0912708	6.36796	1513.96	93.0225	1616.71	75.4872	1751.39	116.421	1765.39	107.938	13.5567	6.35562	1751.39	116.421
AROM1-017	0.107148	3.72101	4.26644	7.25421	0.288409	5.60461	0.863188	0.0843779	3.99751	1633.58	80.8801	1686.91	59.7405	1751.47	68.1169	1637.32	62.9692	6.73139	3.16178	1751.47	68.1169
AROM1-073	0.10738	6.44841	4.55917	8.81362	0.307656	6.36115	0.682801	0.0892244	9.98522	1729.16	96.4846	1741.84	73.5222	1755.42	117.988	1727.46	166.005	1.49575	0.727831	1755.42	117.988
AROM1-042	0.10741	4.25099	4.4892	8.84615	0.302722	7.13806	0.88001	0.0818498	4.51553	1704.79	106.938	1728.98	73.5874	1755.94	77.7762	1590.14	69.1698	2.91285	1.39892	1755.94	77.7762
AROM1-038	0.107499	3.50303	4.27986	8.81407	0.288358	6.95025	0.928196	0.0762642	4.67224	1633.32	100.288	1689.49	72.6698	1757.46	64.0795	1485.52	67.0288	7.06348	3.32506	1757.46	64.0795
AROM1-091	0.107779	5.86953	4.51574	8.3008	0.303633	6.04983	0.707433	0.0857961	8.11584	1709.3	90.8413	1733.87	69.1106	1762.2	107.307	1663.74	130.036	3.00213	1.41749	1762.2	107.307
AROM1-135	0.107997	8.15614	3.85313	11.3316	0.258461	7.8775	0.694211	0.085964	8.64417	1481.96	104.304	1603.92	91.5982	1765.9	149.043	1666.86	138.781	16.0791	7.60394	1765.9	149.043
AROM1-023	0.108001	3.8043	3.96577	7.31356	0.265956	5.7191	0.857384	0.0784901	4.06868	1520.24	77.4566	1627.22	59.3737	1765.96	69.5181	1527.28	59.9392	13.9141	6.57419	1765.96	69.5181
AROM1-044	0.108076	5.06769	4.21038	7.85377	0.282175	6.18714	0.764326	0.0796008	4.98034	1602.31	87.782	1676.05	64.5274	1767.23	92.5905	1548.08	74.3576	9.33235	4.39962	1767.23	92.5905
AROM1-085	0.10815	4.2007	4.00785	5.6895	0.26855	4.37381	0.68023	0.0822271	5.96932	1533.44	59.691	1635.79	46.2663	1768.48	76.7381	1597.19	91.8803	13.2906	6.25692	1768.48	76.7381
AROM1-158	0.108181	4.34182	4.73584	6.73168	0.317076	5.17033	0.764206	0.0916078	5.19429	1775.43	80.2437	1773.61	56.4939	1769	79.3111	1771.64	88.2987	-0.36337	-0.102974	1769	79.3111
AROM1-027	0.108304	4.56368	4.46343	8.8404	0.298487	6.95566	0.859532	0.0878646	5.53787	1683.8	103.082	1724.2	73.4619	1771.09	83.3426	1702.21	90.6085	4.92841	2.34299	1771.09	83.3426
AROM1-168	0.108314	5.40867	4.19197	7.25612	0.28038	4.95682	0.666822	0.0906902	8.06104	1593.28	69.9756	1672.45	59.5549	1771.25	98.7719	1754.64	135.933	10.048	4.73413	1771.25	98.7719
AROM1-119	0.108339	5.91421	4.43959	8.81239	0.296918	6.46194	0.741389	0.0907034	6.34442	1676.01	95.3755	1719.76	73.1561	1771.67	107.998	1754.88	106.923	5.39964	2.54384	1771.67	107.998
AROM1-006	0.108466	3.9097	3.94372	8.71273	0.263393	7.60482	0.893914	0.0790086	6.45328	1507.18	102.214	1622.7	70.6866	1773.81	71.3757	1536.99	95.7353	15.0317	7.11912	1773.81	71.3757
AROM1-099	0.108547	4.1376	4.70367	6.07643	0.314031	4.43662	0.732356	0.0885345	7.06568	1760.51	68.3524	1767.89	50.9242	1775.18	75.5236	1714.65	116.49	0.826086	0.41741	1775.18	75.5236
AROM1-026	0.108675	4.16058	4.09426	9.29237	0.272866	7.752	0.896316	0.0805229	6.17889	1555.33	107.137	1653.16	75.9732	1777.33	75.9233	1565.34	93.285	12.4903	5.91769	1777.33	75.9233
AROM1-167	0.108699	4.14681	4.39329	5.91399	0.292799	4.35337	0.713341	0.0860448	4.7358	1655.5	63.5618	1711.08	48.9534	1777.73	75.6683	1668.37	75.9802	6.87558	3.24815	1777.73	75.6683
AROM1-060	0.108745	2.76411	4.504	4.6003	0.300065	3.83605	0.800073	0.06775	9.75223	1691.63	57.0774	1731.71	38.242	1778.5	50.4329	1324.98	125.46	4.88408	2.31441	1778.5	50.4329
AROM1-144	0.108817	6.33885	4.31334	9.38975	0.287123	6.87203	0.737766	0.0842805	9.68294	1627.13	98.829	1695.91	77.5485	1779.71	115.639	1635.51	152.703	8.57295	4.05559	1779.71	115.639
AROM1-062	0.108822	4.65907	4.26394	7.04714	0.283883	5.3989	0.750436	0.0867901	5.96859	1610.89	76.9586	1686.43	58.025	1779.78	84.9944	1682.23	96.5712	9.48969	4.47941	1779.78	84.9944
AROM1-074	0.108913	5.04445	4.60595	7.24287	0.306438	5.60094	0.719592	0.0903117	5.1854	1723.16	84.695	1750.35	60.4956	1781.32	92.0076	1747.62	87.001	3.26523	1.5535	1781.32	92.0076
AROM1-170	0.108914	3.60687	4.21273	5.80964	0.280234	4.68134	0.784231	0.0847802	5.78046	1592.54	66.0594	1676.5	47.7086	1781.32	65.787	1644.82	91.5192	10.598	5.00827	1781.32	65.787
AROM1-141	0.108961	4.80857	4.20168	7.38169	0.279327	5.5322	0.758775	0.0823219	6.4911	1587.97	77.8698	1674.35	60.615	1782.12	87.6968	1598.96	100.038	10.8939	5.15862	1782.12	87.6968
AROM1-021	0.109302	4.97143	3.9403	9.56149	0.261104	7.77173	0.855255	0.0726197	8.1127	1495.49	103.738	1622	77.5846	1787.82	90.6042	1416.96	111.323	16.3512	7.79963	1787.82	90.6042
AROM1-032	0.109417	4.41919	4.37243	8.57454	0.289426	6.73659	0.860195	0.0801993	5.53363	1638.66	97.4837	1707.14	70.974	1789.73	80.5209	1559.28	83.2117	8.4411	4.01171	1789.73	80.5209
AROM1-028	0.109431	4.20413	4.403	8.50808	0.291413	6.76524	0.872851	0.0844687	5.29804	1648.59	98.4189	1712.9	70.5136	1789.95	76.6003	1639.01	83.5807	7.89789	3.75494	1789.95	76.6003
AROM1-067	0.109444	3.72029	4.31925	5.26705	0.285946	3.97906	0.709379	0.0778405	4.78285	1621.24	57.039	1697.04	43.4531	1790.18	67.7827	1515.1	69.9365	9.4372	4.4667	1790.18	67.7827
AROM1-071	0.109713	5.40641	4.87082	7.60608	0.321688	5.74366	0.705167	0.0905118	5.84007	1797.97	90.124	1797.22	64.1611	1794.64	98.4501	1751.33	98.2114	-0.1851	-0.0413819	1794.64	98.4501
AROM1-103	0.109882	5.51337	4.16097	8.25254	0.274415	6.13212	0.744088	0.085465	8.94023	1563.18	85.124	1666.37	67.6585	1797.45	100.364	1657.57	142.78	13.0335	6.19274	1797.45	100.364
AROM1-129	0.10996	4.48237	4.53305	6.5865	0.298662	4.86769	0.732738	0.0837005	5.55777	1684.67	72.1678	1737.06	54.8444	1798.74	81.5831	1624.69	86.9496	6.34164	3.01559	1798.74	81.5831
AROM1-131	0.110039	3.5676	4.27407	5.5859	0.281389	4.3032	0.769474	0.0807449	5.70064	1598.35	60.9183	1688.38	45.9955	1800.05	64.9231	1569.49	86.2693	11.2052	5.33235	1800.05	64.9231
AROM1-001	0.110144	4.35869	4.75811	7.75566	0.312966	6.19351	0.827647	0.0922562	4.70607	1755.28	95.1765	1777.54	65.1627	1801.78	79.3029	1783.64	80.5023	2.58041	1.25204	1801.78	79.3029
AROM1-125	0.110161	4.42436	4.24102	6.74933	0.278923	5.1364	0.755195	0.0832513	6.23922	1585.94	72.2163	1682	55.5108	1802.07	80.4948	1616.31	97.1515	11.9936	5.7112	1802.07	80.4948
AROM1-116	0.110225	3.20562	4.49977	5.19558	0.295803	3.97421	0.787289	0.0894451	5.02717	1670.46	58.485	1730.93	43.1888	1803.12	58.3142	1731.55	83.5963	7.35736	3.4933	1803.12	58.3142
AROM1-153	0.110278	3.56437	4.07878	5.92085	0.267893	4.74409	0.798498	0.0811194	4.95671	1530.1	64.6196	1650.07	48.3184	1803.99	64.8159	1576.49	75.3126	15.1825	7.27085	1803.99	64.8159
AROM1-014	0.110306	4.15559	4.51414	7.68218	0.296429	5.86353	0.845027	0.0819715	5.05889	1673.58	86.4321	1733.58	63.9418	1804.46	75.5628	1592.42	77.6158	7.25318	3.46127	1804.46	75.5628
AROM1-151	0.11035	3.65321	4.37327	5.26083	0.287047	3.80592	0.719583	0.0707156	4.22657	1626.75	54.7201	1707.3	43.5028	1805.18	66.4221	1381.05	56.5002	9.88437	4.71792	1805.18	66.4221
AROM1-013	0.110396	3.8771	4.51034	7.2834	0.295939	5.70484	0.849099	0.0795841	4.08849	1671.14	83.9854	1732.88	60.6052	1805.95	70.4868	1547.77	61.0102	7.46455	3.56275	1805.95	70.4868
AROM1-009	0.110825	3.19257	4.55844	6.64753	0.297956	5.58611	0.87793	0.0815467	4.31349	1681.17	82.6693	1741.7	55.4095	1812.98	57.9948	1584.48	65.8432	7.27045	3.47576	1812.98	57.9948
AROM1-058	0.110827	4.17462	4.91922	6.88573	0.321565	5.45753	0.795263	0.0878687	6.24373	1797.37	85.6091	1805.56	58.1683	1813.01	75.834	1702.28	102.191	0.8631	0.453713	1813.01	75.834
AROM1-053	0.110965	8.57091	4.86635	12.5156	0.317678	9.13974	0.728717	0.0851787	4.75641	1778.38	142.069	1796.45	105.8	1815.27	155.655	1652.24	75.6024	2.03243	1.00596	1815.27	155.655
AROM1-004	0.110984	2.65713	4.83568	5.98123	0.315648	5.09139	0.897078	0.0894299	3.394	1768.44	78.748	1791.13	50.3666	1815.58	48.2538	1731.27	56.3917	2.59652	1.26656	1815.58	48.2538
AROM1-049	0.111639	4.73185	4.7834	7.95682	0.31036	6.57276	0.80425	0.0844683	7.53922	1742.48	100.364	1781.99	66.9193	1826.28	85.8258	1639.01	119.041	4.58844	2.21722	1826.28	85.8258
AROM1-039	0.111833	7.64495	4.57686	13.6838	0.29642	10.5684	0.831487	0.0891578	8.46629	1673.53	155.802	1745.06	114.512	1829.42	138.614	1726.22	140.567	8.52147	4.09925	1829.42	138.614
AROM1-075	0.111946	5.95206	4.76692	8.83893	0.308557	6.85984	0.740159	0.0902691	8.07668	1733.6	104.283	1779.09	74.3187	1831.25	107.897	1746.83	135.615	5.33226	2.55677	1831.25	107.897
AROM1-076	0.112099	4.72673	4.7367	6.40525	0.306187	4.80033	0.678571	0.0878022	4.85561	1721.92	72.542	1773.76	53.7509	1833.72	85.6602	1701.05	79.3717	6.09697	2.92253	1833.72	85.6602
AROM1-066	0.112449	3.47201	4.73912	4.96103	0.305357	3.8064	0.716112	0.0846752	4.29703	1717.82	57.4013	1774.19	41.6196	1839.37	62.8811	1642.86	67.9154	6.60843	3.17713	1839.37	62.8811
AROM1-180	0.113178	7.34112	5.03095	10.3233	0.322142	7.37509	0.703156	0.090317	7.28074	1800.18	115.852	1824.55	87.6572	1851.06	132.704	1747.72	122.27	2.74837	1.33533	1851.06	132.704
AROM1-082	0.113233	4.94921	4.28716	7.45551	0.274365	5.82191	0.748579	0.0849332	6.84699	1562.92	80.8056	1690.9	61.4589	1851.94	89.4564	1647.67	108.631	15.6063	7.56863	1851.94	89.4564
AROM1-152	0.113823	3.77417	4.97211	5.65814	0.316394	4.23378	0.745035	0.0916793	5.42796	1772.1	65.6001	1814.59	47.8672	1861.33	68.1427	1772.96	92.3462	4.79407	2.34189	1861.33	68.1427
AROM1-136	0.114076	5.37716	4.90619	7.95511	0.31156	5.87737	0.736961	0.0887783	6.8894	1748.38	90.0083	1803.32	67.1965	1865.33	97.0394	1719.18	113.864	6.26977	3.04682	1865.33	97.0394
AROM1-145	0.114176	5.02736	4.51182	8.46684	0.286235	6.66375	0.804831	0.0826517	7.95355	1622.69	95.6029	1733.15	70.4863	1866.92	90.7099	1605.12	123.1	13.0822	6.37352	1866.92	90.7099
AROM1-065	0.114785	4.28935	5.15364	6.45504	0.325305	5.02003	0.747885	0.0914998	4.89813	1815.58	79.4367	1844.99	54.9458	1876.51	77.3073	1769.64	83.1639	3.24679	1.59407	1876.51	77.3073
AROM1-016	0.115202	4.46473	4.92585	8.34901	0.309709	6.512	0.847714	0.0894252	4.88949	1739.28	99.2764	1806.7	70.582	1883.05	80.407	1731.18	81.2855	7.63503	3.73169	1883.05	80.407
AROM1-121	0.11559	5.18315	4.59921	8.64748	0.288287	6.86814	0.800487	0.0911143	7.36306	1632.96	99.084	1749.12	72.245	1889.1	93.2797	1762.5	124.66	13.5588	6.64123	1889.1	93.2797
AROM1-052	0.118367	3.11887	4.77525	5.08975	0.292234	4.06607	0.790304	0.0800809	4.97546	1652.68	59.2782	1780.56	42.7571	1931.71	55.8541	1557.07	74.7003	14.4446	7.18174	1931.71	55.8541
AROM1-108	0.122234	4.13281	5.8225	6.13627	0.345181	4.44248	0.739342	0.100532	7.34806	1911.54	73.4901	1949.76	53.2228	1989.08	73.5247	1936.2	136.128	3.89823	1.96027	1989.08	73.5247
AROM1-097	0.122424	5.37762	5.29177	8.532	0.313249	6.61488	0.776362	0.0902537	8.07445	1756.68	101.723	1867.54	72.9888	1991.85	95.639	1746.55	135.556	11.8066	5.93605	1991.85	95.639
AROM1-146	0.164238	3.14569	9.52317	4.99244	0.420002	3.60852	0.778517	0.119723	4.57983	2260.49	68.8061	2389.78	45.9064	2499.76	52.9511	2285.63	99.2195	9.57178	5.41035	2499.76	52.9511
AROM1-130	0.182139	3.09005	10.493	4.85048	0.417367	3.74456	0.770815	0.127066	4.82209	2248.52	71.0842	2479.3	44.9951	2672.44	51.1442	2417.75	110.183	15.8629	9.30843	2672.44	51.1442
AROM1-173	0.188007	4.17849	12.568	6.32229	0.484358	4.86664	0.750704	0.141248	5.0129	2546.22	102.379	2647.83	59.5322	2724.81	68.822	2670.48	125.793	6.55411	3.83739	2724.81	68.822
AROM1-055	0.192178	3.55986	12.5422	5.81209	0.472782	4.57237	0.790486	0.14069	14.1335	2495.75	94.6266	2645.9	54.71	2760.89	58.4393	2660.61	355.445	9.60356	5.67487	2760.89	58.4393
Rejected data
Analysis_name	bias_corr_samples_Pb207_Pb206	bias_corr_samples_Pb207_Pb206_err	bias_corr_samples_Pb207_U235	bias_corr_samples_Pb207_U235_err	bias_corr_samples_Pb206_U238	bias_corr_samples_Pb206_U238_err	rho	bias_corr_samples_Pb208_Th232	bias_corr_samples_Pb208_Th232_err	samples_Pb206_U238_age,	samples_Pb206_U238_age_err	samples_Pb207_U235_age	samples_Pb207_U235_age_err	samples_Pb207_Pb206_age	samples_Pb207_Pb206_age_err	samples_Pb208_Th232_age	samples_Pb208_Th232_age_err	discordance_Pb206U238_Pb207Pb206	discordance_Pb206U238_Pb207U235	best_age	best_age_err
AROM1-105	0.124998	3.33156	1.0803	7.16589	0.0626289	6.27794	0.885402	0.0140961	12.4988	391.593	23.8523	743.779	37.8023	2028.77	58.9934	282.923	35.1462	80.698	47.3508	391.593	23.8523
AROM1-106	0.528874	4.35995	9.45934	5.76621	0.129611	3.66087	0.654733	1.28588	7.55282	785.645	27.078	2383.61	52.9994	4323.77	63.9689	16710.4	877.533	81.8296	67.0397	785.645	27.078
AROM1-064	0.081063	7.61856	1.48172	10.7841	0.132434	7.7579	0.707842	0.051499	14.4964	801.737	58.4872	922.933	65.4675	1222.97	149.683	1014.99	144.016	34.4435	13.1316	801.737	58.4872
AROM1-072	0.0935235	4.2654	1.7714	7.24749	0.137244	6.22084	0.809921	0.0452017	6.91713	829.058	48.3966	1035.03	47.0702	1498.51	80.6667	893.579	60.5542	44.6745	19.9003	829.058	48.3966
AROM1-179	0.0792203	5.29334	1.53558	7.38502	0.14047	5.31354	0.697655	0.0431629	5.68333	847.319	42.1898	944.735	45.443	1177.65	104.685	854.114	47.5868	28.0497	10.3114	847.319	42.1898
AROM1-138	0.0797894	5.24183	1.54902	10.0559	0.140634	8.59173	0.853393	0.0535989	6.11316	848.247	68.2903	950.104	62.1264	1191.79	103.453	1055.32	62.956	28.8256	10.7206	848.247	68.2903
AROM1-109	0.105226	5.71211	2.15652	9.29325	0.14851	7.27312	0.788823	0.0468077	9.16192	892.604	60.6278	1167.15	64.5546	1718.27	104.996	924.612	82.974	48.0521	23.5229	892.604	60.6278
AROM1-169	0.0865544	4.82584	2.11808	8.639	0.177288	7.24681	0.829483	0.061245	6.69091	1052.14	70.3524	1154.71	59.6552	1350.59	93.1166	1201.47	78.1977	22.0978	8.88277	1350.59	93.1166
AROM1-101	0.0877901	3.65937	2.15137	5.18981	0.177588	3.66592	0.709106	0.059236	5.67642	1053.78	35.639	1165.49	35.9897	1377.89	70.343	1163.17	64.2646	23.5222	9.58486	1377.89	70.343
AROM1-010	0.0886722	3.73283	2.30737	6.6778	0.188494	5.25455	0.830311	0.0582604	4.58045	1113.21	53.7235	1214.55	47.3383	1397.09	71.5663	1144.55	51.0331	20.3192	8.34401	1397.09	71.5663
AROM1-089	0.0889081	9.16199	2.18524	14.262	0.178117	11.1297	0.766492	0.0700167	12.5835	1056.68	108.482	1176.35	99.6689	1402.18	175.533	1367.85	167.117	24.6404	10.1731	1402.18	175.533
AROM1-124	0.0896811	4.30349	2.37447	6.52698	0.191829	4.94829	0.751872	0.0659555	5.08353	1131.27	51.3431	1234.95	46.6669	1418.75	82.2637	1290.99	63.676	20.2625	8.395	1418.75	82.2637
AROM1-149	0.0913269	5.31237	2.04292	8.08409	0.162025	5.92652	0.754061	0.0486596	7.10413	968.02	53.2714	1129.94	55.1631	1453.43	101.074	960.34	66.7384	33.3974	14.3297	1453.43	101.074
AROM1-157	0.0920311	3.43856	2.21559	5.06978	0.17437	3.76127	0.734868	0.0573513	3.62145	1036.14	36.0017	1185.98	35.4833	1468.03	65.2934	1127.18	39.7418	29.4195	12.6341	1468.03	65.2934
AROM1-020	0.0937405	7.25873	2.61889	10.9245	0.202353	7.7684	0.74826	0.0556717	14.9404	1187.95	84.2855	1305.95	80.4415	1502.89	137.197	1095.04	159.881	20.9557	9.03578	1502.89	137.197
AROM1-087	0.0970262	5.6622	2.66326	8.10304	0.198915	6.16477	0.716699	0.0742559	7.54981	1169.49	65.9371	1318.33	59.8862	1567.72	106.116	1447.77	105.757	25.402	11.2897	1567.72	106.116
AROM1-123	0.102958	4.89649	2.90658	6.67755	0.204538	4.45775	0.680044	0.0719693	4.85635	1199.66	48.7974	1383.62	50.4882	1678.11	90.4563	1404.7	66.0083	28.5117	13.2961	1678.11	90.4563
AROM1-002	0.105894	5.33064	3.01555	9.9485	0.206305	8.23191	0.844502	0.0660938	7.20393	1209.1	90.7611	1411.56	76.0009	1729.9	97.8428	1293.61	90.4734	30.1056	14.3429	1729.9	97.8428
AROM1-079	0.107486	4.44296	3.08961	5.73821	0.208292	4.18867	0.639307	0.0455743	5.21344	1219.71	46.5481	1430.12	44.0454	1757.24	81.2755	900.783	45.9829	30.5893	14.7125	1757.24	81.2755
AROM1-056	0.107988	3.12606	3.46328	6.05768	0.232329	5.16933	0.856565	0.0482837	5.92301	1346.7	62.8266	1518.89	47.7628	1765.75	57.1258	953.093	55.2169	23.7324	11.3371	1765.75	57.1258
AROM1-012	0.108856	3.55028	3.0043	6.95843	0.199914	5.68541	0.861179	0.0708309	4.27539	1174.86	61.0642	1408.71	53.0583	1780.36	64.7625	1383.22	57.241	34.0101	16.6005	1780.36	64.7625
AROM1-126	0.110111	2.62003	3.50046	4.43399	0.230321	3.63315	0.806844	0.0642307	3.97673	1336.18	43.8453	1527.32	35.032	1801.24	47.6724	1258.25	48.57	25.8186	12.5145	1801.24	47.6724
AROM1-111	0.110607	7.24525	3.81512	11.1949	0.249941	8.49816	0.762336	0.0798507	10.5251	1438.17	109.555	1595.94	90.3017	1809.41	131.668	1552.76	157.925	20.517	9.88559	1809.41	131.668
AROM1-177	0.111128	3.84099	3.85612	6.51145	0.25145	5.41852	0.807855	0.0907646	5.03891	1445.95	70.1867	1604.55	52.548	1817.94	69.734	1756.02	84.9275	20.4622	9.88427	1817.94	69.734
AROM1-047	0.112166	4.42969	3.59946	7.87555	0.23244	6.6845	0.827107	0.0908153	6.95565	1347.28	81.2748	1549.41	62.6603	1834.81	80.2671	1756.96	117.387	26.5714	13.046	1834.81	80.2671
AROM1-117	0.114838	3.77635	2.65592	6.35544	0.167578	5.02067	0.804453	0.0356303	6.92353	998.752	46.4535	1316.29	46.914	1877.34	68.0549	707.634	48.203	46.7997	24.1236	1877.34	68.0549
AROM1-150	0.116984	5.95425	2.46571	9.40694	0.152665	7.26091	0.774185	0.0460917	8.6877	915.887	61.9955	1262.04	68.0578	1910.65	106.89	910.783	77.5182	52.0641	27.4279	1910.65	106.89
AROM1-128	0.11722	7.88645	2.92049	17.5049	0.180503	15.6406	0.892762	0.0653834	16.5016	1069.72	154.196	1387.23	133.163	1914.26	141.518	1280.14	205.736	44.1183	22.8881	1914.26	141.518
AROM1-078	0.117708	4.16836	4.24506	5.50714	0.261335	4.16067	0.66041	0.0766202	6.95038	1496.67	55.5724	1682.78	45.2874	1921.71	74.7347	1492.2	100.226	22.118	11.0599	1921.71	74.7347
AROM1-022	0.118028	3.28259	4.15421	7.72123	0.254927	6.52187	0.907293	0.08617	8.14654	1463.83	85.4107	1665.04	63.271	1926.58	58.8206	1670.7	131.055	24.0193	12.0842	1926.58	58.8206
AROM1-090	0.511202	83.7121	273.467	132.041	3.87668	102.124	0.773346	3.96209	87.198	10214.1	7299.72	5701.2	65535	4273.84	1231.9	32376.5	24084	-138.992	-79.1573	4273.84	1231.9
Primary reference material
Analysis_name	bias_corr_pleis_Pb207_Pb206	bias_corr_pleis_Pb207_Pb206_err	bias_corr_pleis_Pb207_U235	bias_corr_pleis_Pb207_U235_err	bias_corr_pleis_Pb206_U238	bias_corr_pleis_Pb206_U238_err	rho	bias_corr_pleis_Pb208_Th232	bias_corr_pleis_Pb208_Th232_err	pleis_Pb206_U238_age,	pleis_Pb206_U238_age_err	pleis_Pb207_U235_age	pleis_Pb207_U235_age_err	pleis_Pb207_Pb206_age	pleis_Pb207_Pb206_age_err	pleis_Pb208_Th232_age	pleis_Pb208_Th232_age_err	discordance_Pb206U238_Pb207Pb206	discordance_Pb206U238_Pb207U235
PLEIS-01	0.0536144	4.04835	0.413019	10.2184	0.0558131	9.2679	0.91824	0.0163472	6.07283	350.112	31.5829	351.047	30.3363	354.889	91.4266	327.742	19.7524	1.34592	0.266291
PLEIS-02	0.0532004	4.17413	0.398219	11.6373	0.0542311	10.2099	0.935254	0.0169062	5.8771	340.446	33.8575	340.356	33.6659	337.355	94.5633	338.856	19.7585	-0.916143	-0.0264437
PLEIS-03	0.0534829	4.39385	0.410982	11.6675	0.0556729	10.152	0.928201	0.017111	6.09712	349.256	34.5134	349.582	34.5205	349.338	99.3275	342.926	20.7429	0.0233932	0.0932864
PLEIS-04	0.0523402	4.33278	0.373376	11.4915	0.0516741	9.75652	0.929704	0.0173469	6.5114	324.791	30.9035	322.152	31.7326	300.301	98.7917	347.612	22.4534	-8.15526	-0.819188
PLEIS-05	0.0537226	4.64372	0.376385	11.3202	0.0507449	9.0307	0.920168	0.0164866	5.56598	319.093	28.115	324.375	31.4423	359.437	104.787	330.514	18.255	11.2242	1.62814
PLEIS-06	0.0522123	4.3579	0.359671	13.2301	0.0498921	11.0361	0.951449	0.016637	5.90728	313.859	33.8085	311.969	35.5502	294.717	99.4647	333.504	19.5488	-6.49502	-0.605745
PLEIS-07	0.0537643	4.45584	0.40379	13.7992	0.0543972	11.5688	0.953395	0.0170532	5.28171	341.462	38.4754	344.393	40.3241	361.189	100.516	341.777	17.9078	5.46181	0.851277
PLEIS-08	0.0533979	3.47351	0.397964	7.24189	0.0539852	6.48063	0.877634	0.0166493	6.26584	338.942	21.3982	340.171	20.9359	345.741	78.573	333.749	20.7511	1.96638	0.361048
PLEIS-09	0.0539258	4.05185	0.411243	6.98335	0.0552499	6.10909	0.816544	0.0166162	6.73291	346.673	20.6192	349.77	20.6657	367.953	91.2927	333.091	22.2552	5.78336	0.885438
PLEIS-10	0.0530934	5.12037	0.40871	5.63077	0.0557777	4.81173	0.528537	0.0167007	6.1658	349.896	16.3873	347.946	16.5894	332.789	116.095	334.771	20.4817	-5.14069	-0.56059
PLEIS-11	0.0543116	6.05068	0.410341	7.58141	0.0547495	5.68205	0.616937	0.0172803	9.95393	343.615	19.0132	349.121	22.4012	383.992	135.94	346.289	34.2047	10.5151	1.57703
PLEIS-12	0.0529576	5.35819	0.398123	6.78068	0.0544803	5.10506	0.625858	0.0168733	9.74922	341.97	17.0028	340.286	19.6078	326.981	121.614	338.202	32.7242	-4.58381	-0.494672
PLEIS-13	0.0517766	4.39129	0.388104	6.37908	0.0543201	4.60356	0.725351	0.0159729	9.68161	340.99	15.2898	332.984	18.1117	275.554	100.576	320.296	30.7889	-23.7471	-2.40458
PLEIS-14	0.0525309	4.40385	0.38522	6.56187	0.0531386	4.62674	0.742273	0.0179415	9.80663	333.762	15.0494	330.872	18.5309	308.587	100.262	359.424	34.9661	-8.158	-0.873471
PLEIS-15	0.053553	3.36575	0.397303	5.4388	0.0537537	3.93478	0.788178	0.017284	7.4386	337.526	12.9392	339.69	15.7036	352.3	76.046	346.363	25.5612	4.19351	0.636917
PLEIS-16	0.0538001	3.72786	0.390275	5.96616	0.0525538	4.69788	0.780786	0.0166855	6.18003	330.182	15.121	334.57	17.0073	362.689	84.0717	334.468	20.5106	8.96297	1.31172
PLEIS-17	0.0533498	4.23462	0.389463	6.27592	0.052881	4.31376	0.739926	0.0163586	7.10923	332.185	13.9667	333.977	17.8637	343.701	95.8245	327.968	23.1411	3.35072	0.536618
PLEIS-18	0.0537055	4.32529	0.395961	6.26859	0.0534018	4.43851	0.72399	0.0162117	7.25591	335.373	14.505	338.714	18.0561	358.721	97.6141	325.046	23.41	6.5088	0.986509
PLEIS-19	0.0535665	4.23083	0.38565	6.20504	0.0521457	4.70571	0.731979	0.0170804	6.57791	327.682	15.0344	331.187	17.5371	352.867	95.5821	342.317	22.34	7.13728	1.05836
PLEIS-20	0.0521829	4.21311	0.382132	5.70515	0.0530558	4.43721	0.681164	0.0172056	5.1362	333.256	14.4116	328.606	16.0176	293.433	96.1824	344.805	17.5673	-13.5714	-1.41509
PLEIS-21	0.054024	4.28847	0.39716	5.87869	0.0532782	4.63806	0.69097	0.0171333	5.24877	334.617	15.1238	339.586	16.9695	372.051	96.5536	343.369	17.8783	10.0615	1.46336
PLEIS-22	0.0534782	4.20644	0.400625	5.53327	0.0542931	4.27393	0.659428	0.0166567	5.40362	340.825	14.1883	342.102	16.0718	349.139	95.0944	333.896	17.9022	2.38139	0.37319
PLEIS-23	0.0527822	4.56758	0.40164	6.3049	0.0551498	4.92265	0.694682	0.0165285	5.28453	346.061	16.5862	342.837	18.3466	319.446	103.786	331.347	17.3748	-8.33162	-0.940355
Secondary reference material
Analysis_name	bias_corr_fc5z_Pb207_Pb206	bias_corr_fc5z_Pb207_Pb206_err	bias_corr_fc5z_Pb207_U235	bias_corr_fc5z_Pb207_U235_err	bias_corr_fc5z_Pb206_U238	bias_corr_fc5z_Pb206_U238_err	rho	bias_corr_fc5z_Pb208_Th232	bias_corr_fc5z_Pb208_Th232_err	fc5z_Pb206_U238_age,	fc5z_Pb206_U238_age_err	fc5z_Pb207_U235_age	fc5z_Pb207_U235_age_err	fc5z_Pb207_Pb206_age	fc5z_Pb207_Pb206_age_err	fc5z_Pb208_Th232_age	fc5z_Pb208_Th232_age_err	discordance_Pb206U238_Pb207Pb206	discordance_Pb206U238_Pb207U235
FC5Z-1	0.0764085	2.97949	2.00689	6.18696	0.190287	5.15835	0.877496	0.0551942	3.4993	1122.93	53.1615	1117.84	41.9528	1105.79	59.5518	1085.9	37.0301	-1.54976	-0.455247
FC5Z-2	0.0754464	3.54372	1.80499	7.68609	0.173274	6.15679	0.892024	0.0503975	4.12983	1030.13	58.6165	1047.27	50.2612	1080.42	71.0979	993.809	40.0896	4.65469	1.63644
FC5Z-3	0.0759896	2.97218	1.99785	4.87532	0.190477	4.01594	0.793266	0.0555499	3.92636	1123.96	41.4222	1114.78	33.0019	1094.8	59.5031	1092.71	41.8079	-2.6636	-0.823007
FC5Z-4	0.0749867	3.62167	1.90321	4.89928	0.183931	3.6104	0.676192	0.0536906	5.57982	1088.41	36.1582	1082.21	32.6227	1068.14	72.7957	1057.08	57.549	-1.89761	-0.572887
FC5Z-5	0.0756281	3.44694	1.9144	5.10836	0.183407	3.67035	0.738298	0.0536808	4.41891	1085.56	36.6701	1086.12	34.0846	1085.24	69.1064	1056.89	45.5542	-0.0294384	0.0513495
FC5Z-6	0.0769348	2.62571	1.89945	3.93253	0.178824	2.95383	0.74447	0.0512555	3.4039	1060.55	28.8858	1080.9	26.1644	1119.5	52.3741	1010.31	33.5725	5.2658	1.88258
FC5Z-6	0.0749856	3.49308	1.93801	5.02852	0.187327	3.84694	0.720709	0.0546689	4.16062	1106.88	39.1263	1094.31	33.6924	1068.11	70.2113	1075.83	43.638	-3.62902	-1.14816
User-defined input parameters
pleis_Pb206_U238_known	0.0536372
pleis_Pb207_Pb206_known	0.053243
pleis_Pb207_U235_known	0.394138
pleis_Pb208_Th232_known	0.0168179
pleis_Pb206_U238_known_err	1
pleis_Pb207_Pb206_known_err	0.8
pleis_Pb207_U235_known_err	1.2
pleis_Pb208_Th232_known_err	1
fc5z_Pb206_U238_known	0.185154
fc5z_Pb207_Pb206_known	0.0762119
fc5z_Pb207_U235_known	1.94561
fc5z_Pb208_Th232_known	0.0557219
fc5z_Pb206_U238_known_err	0.75
fc5z_Pb207_Pb206_known_err	0.8
fc5z_Pb207_U235_known_err	1.25
fc5z_Pb208_Th232_known_err	1
reject_poly_order	3
reject_spline_breaks	5
outlier_cutoff_68	15
outlier_cutoff_76	15
outlier_cutoff_75	15
outlier_cutoff_82	25
replace_bad_rho	0.7
BL_xmin	0
BL_xmax	7
threshold_U238	5000
add_sec	5
int_time	14
filter_unc_cutoff	15
filter_transition_68_76	900
filter_disc_transition	600
filter_disc_young	15
filter_disc_old	20
filter_disc_rev	10
poly_order	3

## Sheet: 2SMBT4
Filtered data																								Smith, T.M., Saylor, J.E., Lapen, T.J., Hatfield, K., and Sundell, K.E., 2022, Identifying sources of non-unique detrital age distributions through integrated provenance analysis: An example from the Paleozoic Central Colorado Trough: Geosphere, v. 18, https://doi.org/10.1130/GES02541.1
Analysis_name	bias_corr_samples_Pb207_Pb206	bias_corr_samples_Pb207_Pb206_err	bias_corr_samples_Pb207_U235	bias_corr_samples_Pb207_U235_err	bias_corr_samples_Pb206_U238	bias_corr_samples_Pb206_U238_err	rho	bias_corr_samples_Pb208_Th232	bias_corr_samples_Pb208_Th232_err	samples_Pb206_U238_age,	samples_Pb206_U238_age_err	samples_Pb207_U235_age	samples_Pb207_U235_age_err	samples_Pb207_Pb206_age	samples_Pb207_Pb206_age_err	samples_Pb208_Th232_age	samples_Pb208_Th232_age_err	discordance_Pb206U238_Pb207Pb206	discordance_Pb206U238_Pb207U235	best_age	best_age_err
2SMBT4-59	0.0579699	3.87766	0.614846	6.10476	0.0767898	4.83199	0.77259	0.0245963	6.68701	476.933	22.2136	486.612	23.6054	528.624	84.9688	491.131	32.4722	9.77845	1.98904	476.933	22.2136
2SMBT4-54	0.0570464	4.57248	0.605259	7.27703	0.0768163	5.75881	0.778049	0.0245985	9.25538	477.092	26.4829	480.566	27.867	493.329	100.804	491.173	44.962	3.29133	0.722933	477.092	26.4829
2SMBT4-53	0.0586122	3.50078	0.624974	5.74232	0.0771996	4.69202	0.793038	0.026769	6.08068	479.386	21.677	492.96	22.4287	552.721	76.3955	533.945	32.0678	13.2681	2.75357	479.386	21.677
2SMBT4-86	0.0578062	4.42846	0.64393	6.97948	0.0806692	5.35747	0.772944	0.0253607	5.70935	500.116	25.7807	504.736	27.7662	522.426	97.1413	506.204	28.5622	4.27052	0.915435	500.116	25.7807
2SMBT4-56	0.0578449	5.68507	0.649479	8.93603	0.0812904	6.97488	0.77158	0.0296446	8.23206	503.82	33.8031	508.158	35.7414	523.894	124.674	590.474	47.9619	3.83155	0.853591	503.82	33.8031
2SMBT4-94	0.0598499	5.35374	0.672043	7.48776	0.0813282	4.76744	0.702186	0.0269606	6.139	504.045	23.1147	521.954	30.5677	598.152	115.937	537.718	32.6016	15.7329	3.43098	504.045	23.1147
2SMBT4-97	0.056625	6.37638	0.640496	8.05915	0.0819295	4.429	0.615057	0.0259975	5.51149	507.629	21.6206	502.613	31.9598	476.959	140.939	518.753	28.247	-6.43045	-0.997966	507.629	21.6206
2SMBT4-254	0.0588471	7.84117	0.681482	11.2631	0.0838851	8.11055	0.717868	0.0262425	10.2277	519.271	40.4647	527.67	46.3822	561.445	170.859	523.58	52.9317	7.51165	1.59166	519.271	40.4647
2SMBT4-200	0.0618299	8.295	0.724133	10.6566	0.0849008	7.04256	0.628611	0.0276106	12.4269	525.309	35.5284	553.104	45.4766	668.23	177.545	550.507	67.6004	21.388	5.02524	525.309	35.5284
2SMBT4-224	0.0582979	4.78964	0.69248	6.58548	0.0860834	4.52372	0.686317	0.0270058	7.73133	532.332	23.1138	534.289	27.3656	540.976	104.731	538.607	41.1334	1.59779	0.36628	532.332	23.1138
2SMBT4-179	0.057695	5.18004	0.686751	6.64047	0.0862977	4.48386	0.627507	0.0268329	5.86096	533.604	22.9627	530.846	27.4589	518.2	113.71	535.203	30.9801	-2.97259	-0.519459	533.604	22.9627
2SMBT4-164	0.0584308	4.41503	0.697201	5.12201	0.086506	3.21226	0.518473	0.0273807	6.19751	534.84	16.4871	537.118	21.3678	545.953	96.4577	545.985	33.4121	2.03549	0.424109	534.84	16.4871
2SMBT4-137	0.058315	4.97934	0.735504	6.8493	0.0914157	4.90465	0.687258	0.0285026	5.71275	563.904	26.4825	559.778	29.482	541.618	108.867	568.044	32.0245	-4.11482	-0.737093	563.904	26.4825
2SMBT4-385	0.0880789	4.65134	2.79117	5.68181	0.229644	2.74748	0.582828	0.0407684	7.86249	1332.63	33.0775	1353.17	42.4994	1384.21	89.3337	807.667	62.3468	3.72574	1.51798	1384.21	89.3337
2SMBT4-39	0.0886654	4.82397	2.84302	7.39547	0.23218	5.70767	0.758095	0.0707328	4.81667	1345.92	69.3338	1366.97	55.6079	1396.94	92.4876	1381.37	64.4158	3.65266	1.54003	1396.94	92.4876
2SMBT4-286	0.0888676	7.14591	2.63673	11.5097	0.214839	9.26756	0.784201	0.0630119	5.8565	1254.55	105.662	1310.95	84.9294	1401.31	136.923	1235.09	70.2897	10.4732	4.30218	1401.31	136.923
2SMBT4-20	0.0890281	7.1031	2.576	10.7579	0.209649	8.08717	0.751032	0.0217421	23.1186	1226.95	90.3601	1293.85	78.8458	1404.76	136.039	434.748	99.6798	12.6581	5.17062	1404.76	136.039
2SMBT4-95	0.0893557	8.55817	3.14568	12.7014	0.254984	9.13275	0.73919	0.0737504	30.9537	1464.13	119.631	1443.94	98.1634	1411.8	163.749	1438.25	434.355	-3.70663	-1.3977	1411.8	163.749
2SMBT4-387	0.0895387	7.97291	2.99408	11.3465	0.242323	7.8788	0.711719	0.0204154	9.79563	1398.76	99.077	1406.11	86.574	1415.71	152.47	408.484	39.6508	1.19699	0.522818	1415.71	152.47
2SMBT4-359	0.0896579	6.66411	3.04981	8.90218	0.246433	6.21636	0.663919	0.0709297	15.1772	1420.05	79.2329	1420.19	68.1736	1418.25	127.397	1385.09	204.205	-0.126754	0.00953716	1418.25	127.397
2SMBT4-383	0.0896812	4.1251	2.67777	5.85562	0.216376	3.89968	0.711174	0.0278598	15.6168	1262.7	44.7195	1322.34	43.3167	1418.75	78.8537	555.407	85.7376	10.9991	4.51018	1418.75	78.8537
2SMBT4-317	0.0897109	4.03605	2.89839	5.4597	0.233932	4.24801	0.680473	0.065812	16.4984	1355.07	51.9172	1381.49	41.2391	1419.38	77.1448	1288.27	206.967	4.53074	1.91232	1419.38	77.1448
2SMBT4-363	0.0899198	5.7747	2.91485	7.35355	0.23486	4.83621	0.620253	0.0169449	11.8474	1359.92	59.2963	1385.77	55.6496	1423.83	110.311	339.625	39.9399	4.48831	1.86538	1423.83	110.311
2SMBT4-29	0.0900583	12.7497	2.47527	18.3756	0.19906	13.2438	0.72013	0.0373723	21.9917	1170.27	141.757	1264.83	133.66	1426.77	243.453	741.605	160.773	17.9775	7.47651	1426.77	243.453
2SMBT4-331	0.0900606	4.88113	2.95702	6.19416	0.237774	4.28437	0.619827	0.0706951	8.83737	1375.11	53.0564	1396.65	47.0336	1426.81	93.2036	1380.66	118.285	3.62362	1.54215	1426.81	93.2036
2SMBT4-112	0.0902498	7.10358	3.12372	10.7908	0.250765	8.15387	0.752764	0.0719551	7.00367	1442.42	105.393	1438.55	83.1836	1430.82	135.567	1404.43	95.2462	-0.810839	-0.269166	1430.82	135.567
2SMBT4-212	0.0903384	11.7221	3.35218	16.7274	0.26896	12.0706	0.713432	0.070617	9.31257	1535.52	164.961	1493.3	131.553	1432.69	223.652	1379.18	124.536	-7.17705	-2.82714	1432.69	223.652
2SMBT4-395	0.0903593	7.43582	3.20741	10.3284	0.257226	6.67623	0.69579	0.0790871	14.0727	1475.64	88.0599	1458.95	80.1126	1433.14	141.863	1538.46	209.551	-2.96555	-1.14364	1433.14	141.863
2SMBT4-189	0.0906309	11.7142	2.67148	17.3443	0.213697	12.9412	0.737509	0.051099	14.9684	1248.49	146.911	1320.6	128.831	1438.86	223.315	1007.3	147.619	13.2308	5.46082	1438.86	223.315
2SMBT4-241	0.0906781	4.02945	2.99329	6.03451	0.239162	4.41525	0.74451	0.066765	8.79199	1382.34	54.9347	1405.91	45.9607	1439.85	76.8056	1306.33	111.527	3.99445	1.67701	1439.85	76.8056
2SMBT4-31	0.0908489	2.70211	2.83364	4.71276	0.225883	3.88119	0.819315	0.0712769	4.31404	1312.88	46.1025	1364.49	35.3846	1443.44	51.4801	1391.64	58.099	9.04455	3.78187	1443.44	51.4801
2SMBT4-214	0.0909421	5.418	3.4545	7.21045	0.275323	4.69791	0.659889	6.76292	227.261	1567.76	65.3822	1516.9	56.8371	1445.39	103.196	41422.1	41422.1	-8.46643	-3.35347	1445.39	103.196
2SMBT4-226	0.0910573	6.78187	2.71401	11.3053	0.215999	9.05003	0.800086	0.0566187	15.2186	1260.7	103.639	1332.3	84.0758	1447.8	129.131	1113.17	165.504	12.9232	5.37403	1447.8	129.131
2SMBT4-84	0.0910845	7.89541	2.9394	12.4866	0.233694	9.65294	0.774718	0.0498646	9.01223	1353.83	117.887	1392.12	94.8779	1448.37	150.322	983.552	86.7036	6.52721	2.75034	1448.37	150.322
2SMBT4-352	0.0912188	7.6787	2.81285	10.8858	0.223374	7.87103	0.708964	0.0618387	11.5637	1299.68	92.6517	1358.96	81.7191	1451.18	146.141	1212.78	136.577	10.4395	4.36251	1451.18	146.141
2SMBT4-132	0.0914364	7.8011	3.4433	11.397	0.272927	8.51989	0.729257	0.0727004	57.6988	1555.64	117.772	1514.34	89.9134	1455.71	148.38	1418.48	806.255	-6.865	-2.72735	1455.71	148.38
2SMBT4-253	0.0914392	8.23874	2.97319	12.2343	0.235533	9.05493	0.739265	0.0652906	5.56329	1363.43	111.287	1400.79	93.22	1455.77	156.703	1278.38	69.0351	6.34272	2.66706	1455.77	156.703
2SMBT4-272	0.091757	10.0393	2.98862	14.835	0.235875	11.0975	0.73632	0.0691273	12.6571	1365.21	136.558	1404.73	113.335	1462.36	190.777	1351.04	166.093	6.64314	2.81279	1462.36	190.777
2SMBT4-394	0.091985	13.7896	3.37134	20.1938	0.265596	14.647	0.730562	0.0865341	12.5358	1518.41	198.212	1497.76	159.435	1467.08	261.879	1677.47	202.808	-3.49887	-1.37864	1467.08	261.879
2SMBT4-340	0.0920135	6.75585	3.02625	9.22568	0.2382	6.48126	0.681326	0.0749626	9.1912	1377.33	80.3805	1414.26	70.5229	1467.66	128.29	1461.06	129.967	6.1549	2.61121	1467.66	128.29
2SMBT4-143	0.0921911	9.12123	2.5768	12.7929	0.202601	9.02001	0.701184	0.0224708	8.76323	1189.28	97.9668	1294.07	93.8468	1471.33	173.123	449.157	38.964	19.1695	8.09805	1471.33	173.123
2SMBT4-266	0.0922755	13.0098	2.94328	19.3384	0.23101	14.3685	0.739883	0.0177857	11.2965	1339.79	173.862	1393.12	147.594	1473.06	246.872	356.33	39.9395	9.04732	3.8281	1473.06	246.872
2SMBT4-88	0.0924504	6.43636	2.9247	9.89726	0.229101	7.49197	0.759667	0.0507242	6.7169	1329.79	90.029	1388.32	75.0255	1476.65	122.077	1000.09	65.647	9.94589	4.21629	1476.65	122.077
2SMBT4-63	0.0926394	4.9974	2.66761	7.95387	0.208484	6.75821	0.780998	0.0507709	6.22309	1220.74	75.1626	1319.53	58.8075	1480.53	94.7359	1000.99	60.8669	17.5471	7.48711	1480.53	94.7359
2SMBT4-100	0.0928651	10.6756	2.97138	17.9028	0.231769	14.2752	0.802773	0.0336914	13.6899	1343.77	173.193	1400.33	136.831	1485.14	202.254	669.758	90.3886	9.51914	4.03923	1485.14	202.254
2SMBT4-81	0.0929014	10.6363	2.93019	16.1113	0.228398	12.0872	0.751114	0.0634064	9.489	1326.1	144.901	1389.74	122.559	1485.88	201.489	1242.59	114.683	10.7534	4.57974	1485.88	201.489
2SMBT4-400	0.094486	7.46828	3.75837	9.67223	0.288235	5.56464	0.638601	0.0878547	11.7312	1632.7	80.2656	1583.9	77.7222	1517.85	140.879	1702.02	192.405	-7.56714	-3.08116	1517.85	140.879
2SMBT4-108	0.0947882	8.42193	3.68023	12.5693	0.281274	9.33668	0.742324	0.0721772	7.31635	1597.77	132.147	1567.09	100.686	1523.87	158.743	1408.62	99.7962	-4.84978	-1.9581	1523.87	158.743
2SMBT4-213	0.0955247	7.6181	3.58149	11.8515	0.271753	9.25861	0.766184	0.0824134	12.6181	1549.7	127.554	1545.44	94.3423	1538.44	143.318	1600.67	195.122	-0.731585	-0.275583	1538.44	143.318
2SMBT4-102	0.0956574	12.4052	3.21768	18.0967	0.243666	13.0706	0.728101	0.0329592	18.1088	1405.73	165.12	1461.43	141.085	1541.05	233.297	655.437	117.127	8.7814	3.81135	1541.05	233.297
2SMBT4-181	0.0957362	3.75359	3.46694	5.62023	0.262547	4.62813	0.748086	0.0791072	6.1597	1502.86	62.0435	1519.73	44.3196	1542.6	70.5771	1538.84	91.4762	2.57632	1.11004	1542.6	70.5771
2SMBT4-301	0.0958311	14.725	3.12844	21.222	0.236365	15.4197	0.720146	0.0322383	10.4114	1367.77	190.089	1439.71	164.72	1544.46	276.8	641.325	65.8297	11.4404	4.99679	1544.46	276.8
2SMBT4-05	0.0959359	8.8118	3.4741	13.8225	0.262589	10.7759	0.770505	0.0748869	22.7925	1503.08	144.497	1521.35	109.403	1546.52	165.6	1459.63	323.534	2.80898	1.20143	1546.52	165.6
2SMBT4-177	0.0962482	4.99597	3.65736	6.30569	0.275495	4.20048	0.612492	0.0558738	21.5972	1568.64	58.4877	1562.11	50.3206	1552.62	93.8143	1098.91	232.328	-1.03144	-0.417462	1552.62	93.8143
2SMBT4-51	0.096724	9.19724	3.32694	14.2963	0.249032	11.0041	0.7656	0.0729118	9.27442	1433.48	141.457	1487.39	112.067	1561.87	172.498	1422.46	127.793	8.22047	3.62472	1561.87	172.498
2SMBT4-323	0.0969647	12.5749	3.19578	18.7441	0.238654	14.0017	0.741595	0.0579537	13.6962	1379.69	173.949	1456.14	145.961	1566.54	235.704	1138.69	152.217	11.927	5.24993	1566.54	235.704
2SMBT4-227	0.0970732	4.84111	3.48713	6.51083	0.260326	4.36369	0.668685	0.0824363	10.3017	1491.51	58.1058	1524.31	51.4205	1568.63	90.7173	1601.1	159.203	4.91623	2.15152	1568.63	90.7173
2SMBT4-126	0.0975817	3.70242	3.76683	6.4531	0.27974	5.4794	0.819568	0.0814361	20.8288	1590.05	77.2155	1585.7	51.8229	1578.41	69.2916	1582.41	319.538	-0.737417	-0.274115	1578.41	69.2916
2SMBT4-207	0.0978096	9.66046	3.85144	12.9828	0.28543	8.97353	0.668457	0.0680702	22.9521	1618.65	128.467	1603.57	105.025	1582.78	180.696	1331.04	297.844	-2.26669	-0.940526	1582.78	180.696
2SMBT4-396	0.0979719	11.1181	3.62093	16.1655	0.267824	11.4412	0.726164	0.0638766	11.8366	1529.75	155.834	1554.14	129.315	1585.88	207.878	1251.53	144.159	3.53929	1.56962	1585.88	207.878
2SMBT4-346	0.0980465	6.75326	3.3298	8.58726	0.245989	5.66984	0.619056	0.0446984	13.6599	1417.75	72.1619	1488.07	67.1533	1587.3	126.244	883.846	118.477	10.6813	4.72496	1587.3	126.244
2SMBT4-281	0.0982442	13.0976	3.68905	20.4003	0.271903	15.7327	0.766694	0.0788421	5.98219	1550.46	216.894	1569	164.387	1591.06	244.724	1533.87	88.5576	2.5522	1.18204	1591.06	244.724
2SMBT4-123	0.0983723	8.65393	3.99338	11.91	0.294166	8.53412	0.687657	0.083495	25.6704	1662.32	125.065	1632.85	97.0078	1593.5	161.645	1620.86	403.842	-4.31876	-1.80447	1593.5	161.645
2SMBT4-32	0.0984692	3.00985	3.3397	5.18349	0.245615	4.23844	0.814153	0.0812906	11.6748	1415.82	53.8773	1490.38	40.5257	1595.34	56.2071	1579.69	178.186	11.2522	5.00268	1595.34	56.2071
2SMBT4-90	0.0986203	3.73455	3.64199	6.26854	0.267453	4.92156	0.80337	0.0767125	5.6295	1527.86	66.9502	1558.76	49.9783	1598.2	69.7147	1493.93	81.2312	4.401	1.98224	1598.2	69.7147
2SMBT4-354	0.0987644	7.01539	3.7358	10.1064	0.27401	7.43899	0.720007	0.0834574	11.2894	1561.13	103.148	1579.07	81.1222	1600.92	130.914	1620.16	176.536	2.48585	1.13665	1600.92	130.914
2SMBT4-271	0.0989222	8.0346	3.1418	10.3909	0.230006	6.87626	0.634694	0.0484788	10.9642	1334.53	82.8948	1442.99	80.1997	1603.9	149.876	956.853	102.728	16.7945	7.51638	1603.9	149.876
2SMBT4-162	0.0990559	14.7448	4.04653	22.5466	0.296162	17.1069	0.756523	0.0816764	8.55105	1672.25	252.105	1643.6	185.609	1606.42	274.957	1586.9	130.93	-4.09802	-1.74294	1606.42	274.957
2SMBT4-127	0.0992116	4.58302	3.99055	7.70394	0.291493	6.35892	0.804088	0.0854192	9.97762	1648.98	92.5267	1632.28	62.6293	1609.35	85.431	1656.72	159.335	-2.46299	-1.02358	1609.35	85.431
2SMBT4-98	0.0993122	9.35229	3.27791	13.9391	0.239074	10.1073	0.741698	0.0250782	23.544	1381.88	125.731	1475.82	108.865	1611.24	174.292	500.634	116.758	14.2346	6.36539	1611.24	174.292
2SMBT4-389	0.0993177	5.3398	4.0206	6.97849	0.293365	4.13357	0.646053	0.0901471	8.79026	1658.32	60.4427	1638.37	56.804	1611.34	99.5127	1744.57	147.457	-2.91591	-1.21774	1611.34	99.5127
2SMBT4-373	0.099379	5.64075	3.87529	8.40482	0.282563	6.0983	0.741508	0.0908581	8.38347	1604.26	86.6142	1608.55	67.9375	1612.49	105.106	1757.75	141.63	0.510502	0.266977	1612.49	105.106
2SMBT4-41	0.099547	6.19659	3.564	9.5099	0.259231	7.37929	0.758763	0.071689	7.44365	1485.91	97.9371	1541.55	75.5437	1615.63	115.416	1399.41	100.894	8.02955	3.60991	1615.63	115.416
2SMBT4-386	0.0995695	5.46763	3.9739	6.92715	0.289223	3.87183	0.616714	0.0862106	8.75639	1637.65	55.9951	1628.88	56.2534	1616.05	101.833	1671.45	140.961	-1.33609	-0.538031	1616.05	101.833
2SMBT4-169	0.0996389	5.37586	3.80492	7.67232	0.276856	5.68359	0.713977	0.0798753	7.07223	1575.51	79.4465	1593.79	61.7663	1617.35	100.108	1553.22	106.01	2.58707	1.14682	1617.35	100.108
2SMBT4-75	0.0998273	4.73428	3.62711	8.50776	0.263084	7.71848	0.834084	0.0592786	6.45986	1505.6	103.645	1555.5	67.8174	1620.87	88.1206	1163.98	73.2001	7.11149	3.2079	1620.87	88.1206
2SMBT4-136	0.099912	10.027	3.62935	16.4697	0.263283	13.1394	0.793323	0.0595893	5.37777	1506.62	176.574	1555.99	131.842	1622.45	186.598	1169.91	61.2217	7.13928	3.1732	1622.45	186.598
2SMBT4-353	0.0999979	4.59374	3.81149	5.79852	0.27611	3.86458	0.612599	0.0851025	8.09491	1571.74	53.9044	1595.17	46.6732	1624.04	85.4701	1650.82	128.73	3.22059	1.46906	1624.04	85.4701
2SMBT4-03	0.100005	8.70543	4.16612	13.7251	0.302123	10.7378	0.773165	0.0849541	6.29788	1701.83	160.641	1667.38	112.848	1624.18	161.968	1648.06	99.9204	-4.78073	-2.066	1624.18	161.968
2SMBT4-111	0.100015	6.75714	3.98467	9.86578	0.288643	7.22349	0.728639	0.0829313	11.7348	1634.75	104.312	1631.08	80.2454	1624.37	125.716	1610.34	182.46	-0.639119	-0.224869	1624.37	125.716
2SMBT4-279	0.100102	5.38462	3.65006	8.63934	0.264044	7.03648	0.782655	0.0547698	5.33371	1510.5	94.7586	1560.52	68.9634	1625.99	100.16	1077.77	56.057	7.10273	3.20555	1625.99	100.16
2SMBT4-72	0.100151	3.56028	3.3733	6.76172	0.243879	6.53177	0.857099	0.0577183	15.8693	1406.83	82.5598	1498.22	53.0063	1626.88	66.2177	1134.19	175.794	13.5259	6.09967	1626.88	66.2177
2SMBT4-388	0.100218	7.57599	3.8737	10.4079	0.280106	6.91588	0.686013	0.0787183	14.3619	1591.9	97.5608	1608.22	84.1887	1628.14	140.883	1531.55	212.951	2.22611	1.01496	1628.14	140.883
2SMBT4-130	0.100233	3.65495	3.5457	5.95519	0.25637	5.06546	0.7917	0.0444328	5.84379	1471.24	66.6349	1537.47	47.1997	1628.4	67.9653	878.705	50.3121	9.65128	4.30788	1628.4	67.9653
2SMBT4-398	0.100312	6.80481	4.23014	8.75351	0.305579	4.84838	0.634128	0.0920096	11.0977	1718.92	73.1566	1679.89	72.008	1629.88	126.514	1779.07	189.886	-5.46258	-2.32322	1629.88	126.514
2SMBT4-138	0.1004	5.31815	4.34768	8.13363	0.313868	6.30949	0.756861	0.0845736	4.98203	1759.71	97.1719	1702.46	67.242	1631.5	98.8542	1640.97	78.6758	-7.85854	-3.3632	1631.5	98.8542
2SMBT4-96	0.100557	5.68827	4.14585	8.31944	0.298626	5.67284	0.731412	0.0835897	7.10785	1684.49	84.0983	1663.39	68.1604	1634.4	105.695	1622.62	111.131	-3.0647	-1.26862	1634.4	105.695
2SMBT4-121	0.100603	8.52496	4.13951	12.4368	0.298162	9.37408	0.728545	0.0868793	8.16332	1682.19	138.815	1662.14	102.053	1635.25	158.387	1683.89	132.323	-2.87023	-1.20613	1635.25	158.387
2SMBT4-230	0.10064	6.61829	3.90885	8.84889	0.281456	5.88118	0.663785	0.0541895	11.7914	1598.69	83.2748	1615.51	71.6652	1635.94	122.952	1066.64	122.884	2.27693	1.04139	1635.94	122.952
2SMBT4-168	0.100648	8.35787	3.9863	11.9563	0.287144	8.75644	0.715292	0.0453419	12.1125	1627.24	125.943	1631.41	97.3523	1636.1	155.266	896.291	106.472	0.541309	0.25563	1636.1	155.266
2SMBT4-399	0.100679	8.9897	4.10391	12.3686	0.295377	8.08436	0.687679	0.0859989	9.71629	1668.34	118.849	1655.08	101.318	1636.67	166.991	1667.51	156.118	-1.93537	-0.801271	1636.67	166.991
2SMBT4-173	0.100687	7.99524	4.36514	12.1425	0.314316	9.26583	0.752696	0.0859427	4.81959	1761.91	142.87	1705.77	100.641	1636.8	148.516	1666.47	77.2425	-7.64375	-3.29156	1636.8	148.516
2SMBT4-262	0.100711	2.75954	4.12652	4.2599	0.296766	3.34771	0.762183	0.0823861	5.77787	1675.25	49.3886	1659.57	34.8306	1637.24	51.2571	1600.16	89.0862	-2.32149	-0.944948	1637.24	51.2571
2SMBT4-223	0.100734	4.44463	3.61809	7.12665	0.260301	5.57411	0.781694	0.052406	8.51213	1491.38	74.2188	1553.52	56.7524	1637.67	82.5522	1032.42	85.8564	8.93254	3.99966	1637.67	82.5522
2SMBT4-147	0.100781	3.47378	4.20667	5.05833	0.302576	3.93525	0.728575	0.0807277	4.63408	1704.07	58.9297	1675.32	41.52	1638.55	64.513	1569.17	70.0869	-3.99904	-1.71608	1638.55	64.513
2SMBT4-36	0.100864	2.50854	3.61263	4.45182	0.259363	3.8316	0.826819	0.077414	5.31307	1486.58	50.8702	1552.32	35.4175	1640.07	46.578	1507.1	77.3084	9.35874	4.23478	1640.07	46.578
2SMBT4-10	0.100886	7.60737	3.87674	11.942	0.278556	9.31798	0.770899	0.0854589	8.13816	1584.09	130.886	1608.85	96.6838	1640.48	141.245	1657.46	129.921	3.43725	1.53922	1640.48	141.245
2SMBT4-62	0.100903	5.62944	3.36875	9.24226	0.241717	7.81742	0.794739	0.0331667	7.54619	1395.62	98.1071	1497.16	72.4864	1640.79	104.517	659.495	49.023	14.9423	6.78225	1640.79	104.517
2SMBT4-278	0.100906	6.69446	3.49709	10.4861	0.250967	8.30719	0.770012	0.0416832	11.9934	1443.46	107.444	1526.56	82.9818	1640.84	124.289	825.425	97.2361	12.0291	5.44356	1640.84	124.289
2SMBT4-219	0.100943	10.5695	4.28435	15.1759	0.307615	10.864	0.71759	0.0862813	13.0845	1728.96	164.79	1690.36	125.569	1641.52	196.216	1672.77	211.16	-5.32698	-2.28364	1641.52	196.216
2SMBT4-194	0.101044	3.89779	3.98804	4.5355	0.286126	3.25757	0.541119	0.0843953	6.28089	1622.14	46.7189	1631.76	36.8362	1643.39	72.3231	1637.65	99.0444	1.29284	0.589858	1643.39	72.3231
2SMBT4-282	0.101078	5.04238	3.79801	7.26853	0.272083	5.50445	0.721144	0.0752361	6.55853	1551.37	75.8994	1592.33	58.4859	1644.01	93.5536	1466.2	92.9698	5.63515	2.57233	1644.01	93.5536
2SMBT4-332	0.101105	7.51337	3.97983	10.2433	0.285064	7.231	0.680183	0.0810598	10.3375	1616.82	103.412	1630.09	83.3088	1644.49	139.39	1575.38	157.281	1.68298	0.814492	1644.49	139.39
2SMBT4-285	0.101185	3.40365	3.93024	5.08775	0.281252	4.33359	0.750182	0.0784202	4.84231	1597.67	61.3253	1619.93	41.2045	1645.97	63.1337	1525.97	71.2973	2.93457	1.37437	1645.97	63.1337
2SMBT4-148	0.10139	13.0763	4.40628	18.6275	0.315034	13.3402	0.712199	0.0846805	15.9001	1765.43	206.086	1713.52	155.356	1649.72	242.435	1642.96	252.468	-7.01397	-3.02934	1649.72	242.435
2SMBT4-299	0.101398	7.99324	3.24395	11.5209	0.231637	8.70946	0.721013	0.0389549	15.5741	1343.08	105.602	1467.73	89.6492	1649.87	148.192	772.416	118.373	18.5948	8.49302	1649.87	148.192
2SMBT4-380	0.101422	6.74019	4.14297	9.42561	0.296011	6.43021	0.699236	0.0886968	8.57084	1671.5	94.6833	1662.82	77.2457	1650.31	124.954	1717.66	141.631	-1.28367	-0.52156	1650.31	124.954
2SMBT4-361	0.101444	9.70755	3.9519	14.0298	0.282238	10.2597	0.722032	0.0845501	9.5682	1602.62	145.604	1624.38	114.167	1650.71	179.955	1640.53	151.333	2.91314	1.33937	1650.71	179.955
2SMBT4-140	0.101481	4.24247	4.28966	6.06797	0.306385	4.4408	0.715163	0.087275	5.19624	1722.9	67.1416	1691.38	50.0057	1651.39	78.6388	1691.25	84.4815	-4.33007	-1.86336	1651.39	78.6388
2SMBT4-375	0.101499	6.19048	3.97632	8.30131	0.283879	5.34092	0.666663	0.0836053	8.82282	1610.87	76.1313	1629.38	67.4509	1651.71	114.743	1622.92	138.06	2.47273	1.13598	1651.71	114.743
2SMBT4-163	0.10155	12.1496	3.52356	20.3532	0.251553	16.3813	0.802291	0.0771186	15.3226	1446.48	212.326	1532.52	162.346	1652.64	225.17	1501.56	222.964	12.4746	5.61403	1652.64	225.17
2SMBT4-356	0.101608	12.6685	4.17861	18.0237	0.29792	12.968	0.711356	0.0858446	18.7426	1680.98	191.942	1669.84	148.725	1653.7	234.756	1664.64	301.736	-1.6498	-0.667662	1653.7	234.756
2SMBT4-284	0.101626	3.7558	3.35367	5.50301	0.238952	4.54496	0.736351	0.0545139	9.64319	1381.25	56.5088	1493.65	43.0681	1654.03	69.5946	1072.86	101.012	16.4921	7.52523	1654.03	69.5946
2SMBT4-334	0.101631	4.96706	4.13138	6.09051	0.294393	4.01102	0.583542	0.0855676	10.3636	1663.44	58.8094	1660.53	49.8303	1654.12	92.0381	1659.48	165.79	-0.563769	-0.17535	1654.12	92.0381
2SMBT4-298	0.101689	5.02491	3.7677	6.6833	0.268267	5.14123	0.667179	0.0746679	7.12223	1532	70.1065	1585.89	53.6775	1655.18	93.0974	1455.52	100.269	7.44223	3.39823	1655.18	93.0974
2SMBT4-370	0.101821	5.73169	4.00297	7.40533	0.284859	4.50349	0.633707	0.0844669	9.92712	1615.79	64.366	1634.8	60.2334	1657.58	106.16	1638.98	156.889	2.52129	1.16294	1657.58	106.16
2SMBT4-46	0.101871	6.62503	3.22058	9.84316	0.228898	7.4116	0.739707	0.0518152	6.47238	1328.72	88.999	1462.12	76.4091	1658.48	122.692	1021.07	64.549	19.8831	9.12372	1658.48	122.692
2SMBT4-68	0.101912	6.1286	3.81268	9.6668	0.270869	8.08145	0.775694	0.0820265	8.756	1545.21	111.048	1595.42	77.9125	1659.24	113.487	1593.44	134.611	6.87223	3.14719	1659.24	113.487
2SMBT4-314	0.101919	8.00475	3.85831	12.0853	0.274103	9.17983	0.749262	0.0127439	9.22153	1561.59	127.326	1605.01	97.7549	1659.36	148.227	255.955	23.4678	5.89184	2.70481	1659.36	148.227
2SMBT4-103	0.101933	3.78193	3.89944	5.90278	0.277118	4.2165	0.769789	0.0551013	6.50144	1576.83	58.9817	1613.57	47.7378	1659.61	70.0294	1084.12	68.7432	4.98755	2.27649	1659.61	70.0294
2SMBT4-119	0.101952	10.8651	4.06342	15.2098	0.288791	10.9704	0.70011	0.0773854	21.4369	1635.48	158.5	1646.99	124.558	1659.95	201.178	1506.56	313.639	1.47417	0.698845	1659.95	201.178
2SMBT4-61	0.101953	4.20653	3.36501	8.90993	0.238961	8.31116	0.882944	0.0774908	8.48293	1381.29	103.344	1496.29	69.8537	1659.98	77.8879	1508.54	123.687	16.7887	7.68542	1659.98	77.8879
2SMBT4-76	0.101965	6.18471	3.48701	9.96547	0.247621	8.40633	0.78621	0.043115	8.12053	1426.19	107.565	1524.28	78.7942	1660.2	114.513	853.188	67.9555	14.0952	6.43484	1660.2	114.513
2SMBT4-191	0.102023	6.91633	3.3475	11.9459	0.237871	10.0052	0.815643	0.0404256	14.7939	1375.62	123.954	1492.21	93.6612	1661.24	128.042	801.008	116.518	17.1934	7.81322	1661.24	128.042
2SMBT4-195	0.102037	14.9319	4.30578	21.4016	0.305914	15.6191	0.716515	0.0861985	14.395	1720.57	235.968	1694.47	178.157	1661.51	276.424	1671.23	232.225	-3.55473	-1.54043	1661.51	276.424
2SMBT4-176	0.102053	8.52691	3.93711	13.7947	0.279699	10.9739	0.786132	0.0850277	5.35085	1589.85	154.649	1621.34	112.152	1661.8	157.848	1649.43	84.9315	4.32953	1.94266	1661.8	157.848
2SMBT4-319	0.102084	12.9701	3.73932	19.282	0.265228	14.4256	0.740001	0.0612179	16.2021	1516.54	195	1579.83	155.683	1662.35	240.082	1200.95	189.8	8.77147	4.0063	1662.35	240.082
2SMBT4-374	0.102096	9.5255	4.25088	13.5887	0.301703	9.58396	0.713216	0.0886056	12.1591	1699.75	143.22	1683.91	112.154	1662.57	176.316	1715.97	201.032	-2.23635	-0.940813	1662.57	176.316
2SMBT4-11	0.1021	6.41421	3.85436	9.7974	0.273628	7.54536	0.756033	0.0751179	6.64756	1559.19	104.509	1604.18	79.1479	1662.65	118.725	1463.98	94.0967	6.22264	2.80449	1662.65	118.725
2SMBT4-166	0.102102	5.97131	4.00941	8.59431	0.284695	6.46387	0.719924	0.0694955	8.80443	1614.97	92.3466	1636.11	69.9554	1662.68	110.527	1358	115.968	2.86981	1.29206	1662.68	110.527
2SMBT4-113	0.102103	8.07058	4.23816	12.4167	0.300737	9.46277	0.759956	0.0840075	7.09729	1694.96	141.06	1681.44	102.353	1662.7	149.383	1630.42	111.478	-1.94051	-0.804024	1662.7	149.383
2SMBT4-174	0.102147	4.42302	4.56121	6.37068	0.323739	4.88513	0.721154	0.0897083	5.66588	1807.96	77.0207	1742.21	53.1034	1663.49	81.8601	1736.43	94.4971	-8.68455	-3.77404	1663.49	81.8601
2SMBT4-206	0.102166	14.7233	3.37996	21.9697	0.239809	16.4678	0.742249	0.0409182	16.0461	1385.7	205.405	1499.76	173.824	1663.85	272.482	810.575	127.896	16.7168	7.60498	1663.85	272.482
2SMBT4-371	0.102195	5.50565	4.17726	7.35384	0.296181	4.70458	0.663354	0.0828533	8.36315	1672.35	69.3023	1669.57	60.3179	1664.37	101.886	1608.88	129.753	-0.47923	-0.166176	1664.37	101.886
2SMBT4-114	0.102218	4.06717	4.40603	6.97235	0.312303	5.70753	0.812261	0.0838442	7.37141	1752.03	87.566	1713.47	57.7625	1664.78	75.2619	1627.37	115.588	-5.24111	-2.25012	1664.78	75.2619
2SMBT4-91	0.10222	3.43723	3.9681	6.0537	0.281149	4.86896	0.823396	0.084263	4.63635	1597.15	68.8823	1627.7	49.134	1664.82	63.6046	1635.18	72.9585	4.06471	1.87692	1664.82	63.6046
2SMBT4-73	0.102233	5.88167	3.47226	10.678	0.245921	9.43632	0.835986	0.0485181	18.8255	1417.4	120.081	1520.94	84.3728	1665.06	108.835	957.612	176.843	14.8737	6.80714	1665.06	108.835
2SMBT4-364	0.102252	5.17665	4.08284	6.14159	0.289298	3.47037	0.538738	0.0857464	8.35415	1638.02	50.199	1650.88	50.1325	1665.4	95.785	1662.81	133.795	1.64386	0.77906	1665.4	95.785
2SMBT4-135	0.102293	3.9728	4.28098	6.22003	0.303322	4.98419	0.77008	0.0850784	4.052	1707.76	74.7798	1689.71	51.2412	1666.14	73.503	1650.37	64.318	-2.49806	-1.06818	1666.14	73.503
2SMBT4-37	0.102298	4.49459	3.83631	7.13707	0.271556	5.64728	0.776928	0.0823931	6.05245	1548.69	77.7503	1600.4	57.5459	1666.23	83.1558	1600.29	93.3369	7.05423	3.23075	1666.23	83.1558
2SMBT4-328	0.102318	13.9392	3.92812	20.3607	0.278007	14.8824	0.72891	0.0784763	10.7863	1581.32	208.769	1619.49	166.258	1666.59	257.882	1527.02	159.266	5.11668	2.35716	1666.59	257.882
2SMBT4-288	0.102329	8.28212	3.35603	13.9968	0.237473	11.4803	0.806268	0.0512569	15.0355	1373.55	142.043	1494.2	109.922	1666.78	153.22	1010.34	148.721	17.5928	8.07455	1666.78	153.22
2SMBT4-291	0.102337	3.85432	3.56116	5.63068	0.251962	4.64486	0.73457	0.0506418	8.77187	1448.59	60.2626	1540.92	44.667	1666.94	71.3038	998.509	85.6408	13.0988	5.99217	1666.94	71.3038
2SMBT4-382	0.10239	4.74195	4.13748	6.28074	0.292828	3.85969	0.657106	0.0918855	7.08071	1655.65	56.3577	1661.74	51.404	1667.9	87.714	1776.78	120.797	0.734669	0.366518	1667.9	87.714
2SMBT4-175	0.102446	3.87819	4.5028	5.32426	0.318659	4.01863	0.688363	0.0926069	9.04932	1783.18	62.6041	1731.49	44.2652	1668.91	71.7275	1790.13	155.625	-6.84655	-2.98504	1668.91	71.7275
2SMBT4-358	0.102468	5.50886	3.86045	7.79278	0.272933	5.84677	0.708526	0.0655299	10.6714	1555.67	80.8179	1605.45	62.9273	1669.3	101.882	1282.91	133.088	6.80708	3.10072	1669.3	101.882
2SMBT4-247	0.102522	4.06376	4.06534	5.95703	0.287264	4.44247	0.731328	0.066727	4.36149	1627.84	63.9104	1647.38	48.5824	1670.28	75.1466	1305.61	55.2193	2.54061	1.18587	1670.28	75.1466
2SMBT4-202	0.102591	4.94669	4.21646	6.6769	0.297932	4.99519	0.675561	0.0844427	8.94698	1681.05	73.9187	1677.23	54.8528	1671.52	91.4595	1638.53	141.307	-0.570222	-0.227563	1671.52	91.4595
2SMBT4-234	0.102641	3.95837	3.88247	5.68628	0.274086	4.09297	0.717922	0.0668471	9.03352	1561.51	56.7619	1610.04	45.9434	1672.42	73.178	1307.89	114.732	6.63176	3.01437	1672.42	73.178
2SMBT4-09	0.102651	6.23627	3.33178	12.0227	0.235295	10.3798	0.854992	0.0389071	8.52866	1362.19	127.469	1488.53	94.1639	1672.6	115.287	771.487	64.6609	18.5584	8.48747	1672.6	115.287
2SMBT4-350	0.102681	10.7752	3.6933	15.2671	0.26054	10.9267	0.708465	0.0680718	14.3838	1492.6	145.612	1569.92	122.581	1673.15	199.183	1331.08	186.146	10.7905	4.92475	1673.15	199.183
2SMBT4-92	0.102689	5.91419	4.13096	9.32307	0.291353	7.12853	0.773084	0.0840428	5.7531	1648.29	103.689	1660.45	76.3587	1673.29	109.323	1631.07	90.3526	1.49435	0.732286	1673.29	109.323
2SMBT4-55	0.102701	4.67677	3.79527	7.24028	0.267552	5.62724	0.763513	0.0813822	13.6705	1528.36	76.5732	1591.74	58.2494	1673.5	86.4473	1581.4	209.022	8.67247	3.98179	1673.5	86.4473
2SMBT4-133	0.102711	2.82274	4.27906	5.21178	0.301945	4.76949	0.843664	0.0866058	5.35981	1700.95	71.3088	1689.34	42.9207	1673.68	52.1756	1678.81	86.5303	-1.62903	-0.686826	1673.68	52.1756
2SMBT4-378	0.102752	6.38708	4.09326	8.91221	0.288669	6.04718	0.697679	0.0822459	10.1321	1634.87	87.3285	1652.96	72.8506	1674.43	118.048	1597.54	156.235	2.36213	1.09414	1674.43	118.048
2SMBT4-149	0.102759	9.46737	4.09717	13.3531	0.289032	9.52053	0.705248	0.0633931	7.51109	1636.69	137.634	1653.74	109.406	1674.55	174.976	1242.34	90.7067	2.2611	1.031	1674.55	174.976
2SMBT4-167	0.102848	11.6062	4.33169	17.0727	0.305349	12.663	0.733435	0.0646055	8.3538	1717.78	191.007	1699.41	141.754	1676.14	214.463	1265.37	102.726	-2.48403	-1.08068	1676.14	214.463
2SMBT4-60	0.10286	6.31488	3.75179	10.0382	0.264077	8.26267	0.778611	0.0551919	14.9089	1510.67	111.286	1582.5	80.6455	1676.37	116.685	1085.85	158.235	9.88455	4.53904	1676.37	116.685
2SMBT4-52	0.102893	3.76401	3.73183	6.40928	0.262591	5.31107	0.809612	0.0846346	5.79648	1503.09	71.2091	1578.22	51.3692	1676.95	69.5452	1642.11	91.6277	10.3676	4.76081	1676.95	69.5452
2SMBT4-362	0.102905	4.72366	4.11905	5.21668	0.290003	2.74995	0.434383	0.0859845	8.94161	1641.54	39.8528	1658.09	42.6468	1677.18	87.2737	1667.24	143.605	2.12468	0.997969	1677.18	87.2737
2SMBT4-01	0.102915	4.19295	4.43175	7.56588	0.31234	6.50913	0.832842	0.0869119	7.06475	1752.21	99.8751	1718.29	62.7592	1677.34	77.4668	1684.5	114.505	-4.46364	-1.9739	1677.34	77.4668
2SMBT4-154	0.102918	5.61345	4.37468	8.18779	0.308147	6.10969	0.728212	0.0878021	5.32589	1731.58	92.7831	1707.57	67.7695	1677.4	103.71	1701.05	87.0757	-3.23044	-1.40645	1677.4	103.71
2SMBT4-101	0.102936	3.90289	4.31943	6.39532	0.303963	4.7861	0.793475	0.086942	7.2949	1710.93	71.9239	1697.08	52.777	1677.73	72.1041	1685.06	118.284	-1.97885	-0.816365	1677.73	72.1041
2SMBT4-335	0.103031	11.9104	4.19775	16.7382	0.29506	11.9153	0.702671	0.0852654	18.902	1666.77	175.045	1673.58	138.104	1679.43	219.993	1653.86	302.416	0.754186	0.407168	1679.43	219.993
2SMBT4-170	0.103045	3.59466	4.06647	5.03706	0.286108	3.84563	0.703105	0.0775903	5.40363	1622.05	55.1504	1647.61	41.0729	1679.68	66.3936	1510.41	78.7952	3.43079	1.55115	1679.68	66.3936
2SMBT4-79	0.103072	6.32549	3.95664	10.2966	0.277961	8.69568	0.790873	0.0839265	7.10845	1581.08	121.938	1625.35	83.6459	1680.17	116.825	1628.91	111.554	5.89725	2.72357	1680.17	116.825
2SMBT4-12	0.103076	14.9117	3.99384	21.7856	0.280831	16.0223	0.729063	0.0886562	16.0375	1595.55	226.556	1632.94	178.735	1680.24	275.401	1716.91	265.719	5.04061	2.29003	1680.24	275.401
2SMBT4-261	0.103087	4.55655	4.03375	6.69791	0.283412	4.97749	0.733009	0.0774769	7.75065	1608.52	70.8595	1641.03	54.5512	1680.42	84.1518	1508.28	112.961	4.27873	1.98078	1680.42	84.1518
2SMBT4-397	0.103126	6.44576	4.39254	8.28274	0.308656	4.49936	0.634611	0.0967402	10.5202	1734.09	68.4123	1710.94	68.6099	1681.13	119.032	1866.44	188.437	-3.15023	-1.35323	1681.13	119.032
2SMBT4-381	0.103155	6.93761	4.33808	9.6617	0.304747	6.56914	0.696179	0.0769496	7.83015	1714.81	98.9179	1700.63	79.8897	1681.66	128.106	1498.38	113.4	-1.97139	-0.833634	1681.66	128.106
2SMBT4-24	0.103206	3.6584	3.70659	5.517	0.260151	4.1445	0.748524	0.0863618	4.39521	1490.61	55.1573	1572.79	44.1443	1682.56	67.5463	1674.27	70.7458	11.408	5.22497	1682.56	67.5463
2SMBT4-78	0.103225	9.01167	3.97307	13.8092	0.278699	10.9128	0.758386	0.0865684	8.81293	1584.81	153.357	1628.71	112.479	1682.91	166.379	1678.11	142.418	5.82928	2.6958	1682.91	166.379
2SMBT4-66	0.103229	3.00992	3.87681	5.81512	0.271908	5.84624	0.866772	0.0862764	5.93301	1550.48	80.572	1608.86	46.9717	1682.98	55.5702	1672.68	95.4698	7.87295	3.62888	1682.98	55.5702
2SMBT4-390	0.103233	5.59072	4.08585	6.75751	0.286819	3.36279	0.565833	0.0677939	8.61186	1625.61	48.3189	1651.48	55.1775	1683.04	103.217	1325.82	110.816	3.41201	1.56632	1683.04	103.217
2SMBT4-120	0.103238	13.5379	4.0402	19.7061	0.283566	14.5233	0.726736	0.0624919	7.97544	1609.3	206.904	1642.33	161.747	1683.14	249.938	1225.2	95.0358	4.3872	2.01111	1683.14	249.938
2SMBT4-185	0.103246	5.71569	4.09952	8.2954	0.287866	6.32583	0.725682	0.0843893	7.35132	1630.86	91.1558	1654.21	67.8135	1683.28	105.521	1637.53	115.965	3.11449	1.41165	1683.28	105.521
2SMBT4-225	0.103249	3.68364	3.53703	5.54172	0.248263	4.15076	0.747104	0.0312028	13.1111	1429.51	53.2183	1535.54	43.8947	1683.34	68.0057	621.039	80.3461	15.0788	6.90481	1683.34	68.0057
2SMBT4-50	0.103255	5.81975	3.93202	8.92862	0.27571	6.86637	0.758457	0.0844128	9.37895	1569.72	95.6705	1620.3	72.4003	1683.44	107.44	1637.97	148.106	6.7549	3.1213	1683.44	107.44
2SMBT4-82	0.103256	8.48108	3.94566	13.4547	0.276711	10.4286	0.776316	0.042787	8.0902	1574.78	145.731	1623.1	109.414	1683.46	156.572	846.83	67.2065	6.45582	2.97718	1683.46	156.572
2SMBT4-106	0.103275	3.36531	4.34225	5.35586	0.304591	4.18045	0.777942	0.0874553	8.36137	1714.03	62.9212	1701.42	44.2307	1683.79	62.1253	1694.6	136.374	-1.79606	-0.741088	1683.79	62.1253
2SMBT4-23	0.103283	8.90791	3.81997	12.929	0.267915	9.37725	0.724776	0.0857746	9.47637	1530.21	127.749	1596.96	104.409	1683.94	164.441	1663.34	151.882	9.12925	4.17983	1683.94	164.441
2SMBT4-105	0.103321	3.47669	4.40218	5.56727	0.308651	4.36157	0.781038	0.087458	7.48337	1734.07	66.3163	1712.75	46.0966	1684.62	64.1749	1694.65	122.014	-2.93542	-1.24461	1684.62	64.1749
2SMBT4-327	0.103323	4.95629	3.94789	7.01742	0.276687	5.09006	0.708138	0.0787966	7.96413	1574.66	71.1154	1623.56	56.9124	1684.65	91.4858	1533.02	117.92	6.52889	3.01191	1684.65	91.4858
2SMBT4-19	0.103342	2.99284	3.87447	4.87682	0.27166	3.85979	0.789552	0.0858041	4.061	1549.22	53.1553	1608.38	39.3794	1684.99	55.241	1663.89	64.9684	8.05756	3.67797	1684.99	55.241
2SMBT4-296	0.103374	5.22433	3.77742	7.47864	0.264577	5.97091	0.719843	0.0391037	10.6893	1513.22	80.5357	1587.96	60.112	1685.57	96.4224	775.312	81.4703	10.2249	4.70679	1685.57	96.4224
2SMBT4-71	0.103398	3.96695	3.85034	7.2545	0.269621	6.8198	0.84287	0.0832654	5.90127	1538.88	93.3686	1603.34	58.5389	1686	73.2117	1616.57	91.8917	8.7257	4.02028	1686	73.2117
2SMBT4-145	0.103425	7.55513	4.30092	10.9269	0.301436	8.01773	0.722536	0.085578	11.4171	1698.43	119.727	1693.54	90.2566	1686.47	139.425	1659.68	182.74	-0.70906	-0.288775	1686.47	139.425
2SMBT4-222	0.103431	5.22025	3.64421	7.50622	0.255346	5.39709	0.718569	0.0612716	7.88371	1465.98	70.7718	1559.24	59.8751	1686.58	96.3347	1201.98	92.2078	13.0797	5.98109	1686.58	96.3347
2SMBT4-80	0.103457	6.8167	4.04884	10.7679	0.283383	8.31478	0.774105	0.0900305	11.5709	1608.38	118.368	1644.07	87.8985	1687.05	125.788	1742.41	194.096	4.66343	2.17087	1687.05	125.788
2SMBT4-134	0.103457	4.54956	4.44511	6.87733	0.311403	5.34187	0.750381	0.0858182	5.36868	1747.61	81.7751	1720.79	57.0667	1687.05	83.9529	1664.15	85.9463	-3.58933	-1.55841	1687.05	83.9529
2SMBT4-216	0.103459	6.24167	3.88765	9.27072	0.272354	6.81339	0.739413	0.0587446	12.6756	1552.74	94.0238	1611.12	75.0101	1687.07	115.177	1153.79	142.656	7.96267	3.62369	1687.07	115.177
2SMBT4-218	0.103486	4.68275	4.34827	6.76637	0.304535	4.82598	0.72189	0.0890221	8.85702	1713.76	72.628	1702.57	55.9149	1687.57	86.405	1723.7	146.872	-1.55208	-0.657269	1687.57	86.405
2SMBT4-156	0.103497	6.98163	4.40296	9.81328	0.308408	7.10065	0.70304	0.0855733	11.1296	1732.87	107.904	1712.9	81.374	1687.76	128.82	1659.59	178.108	-2.67279	-1.16591	1687.76	128.82
2SMBT4-239	0.10353	3.45098	4.14138	5.70868	0.289834	4.43222	0.796857	0.081541	10.9634	1640.7	64.2051	1662.51	46.7237	1688.35	63.6705	1584.37	167.761	2.82211	1.31177	1688.35	63.6705
2SMBT4-85	0.103538	4.25909	3.90454	7.59264	0.273091	6.25371	0.82786	0.0621767	7.54371	1556.47	86.483	1614.62	61.4503	1688.49	78.5787	1219.21	89.4522	7.81863	3.60133	1688.49	78.5787
2SMBT4-192	0.103552	7.10296	4.30828	9.99104	0.30162	7.38936	0.704153	0.0850083	9.23601	1699.34	110.393	1694.95	82.5173	1688.74	131.043	1649.07	146.792	-0.627749	-0.259111	1688.74	131.043
2SMBT4-196	0.103557	6.3802	4.70903	9.16301	0.329651	7.22099	0.720888	0.0732399	9.62144	1836.69	115.419	1768.85	76.8893	1688.84	117.707	1428.64	133.148	-8.75474	-3.83538	1688.84	117.707
2SMBT4-366	0.103584	6.80729	3.88108	9.53387	0.271472	6.75851	0.700188	0.0513593	24.8327	1548.27	93.0287	1609.75	77.1205	1689.31	125.579	1012.31	246.692	8.34919	3.81967	1689.31	125.579
2SMBT4-159	0.103604	5.4716	4.53691	7.8319	0.317468	5.85337	0.716163	0.0877012	6.86547	1777.35	90.9312	1737.76	65.2509	1689.66	100.934	1699.17	112.198	-5.1898	-2.27818	1689.66	100.934
2SMBT4-339	0.103614	9.11203	4.04984	12.9583	0.283075	9.41027	0.711167	0.0776363	10.9596	1606.83	133.854	1644.27	105.903	1689.85	168.085	1511.27	160.222	4.91287	2.27689	1689.85	168.085
2SMBT4-33	0.103634	4.1027	3.8512	6.37909	0.269115	4.90057	0.765745	0.0826715	4.4055	1536.31	66.991	1603.52	51.4644	1690.19	75.6772	1605.49	68.1083	9.10454	4.19162	1690.19	75.6772
2SMBT4-04	0.10364	9.13349	4.44144	13.9053	0.310777	10.6134	0.754092	0.0885796	11.8634	1744.53	162.25	1720.1	115.744	1690.3	168.471	1715.49	196.066	-3.20807	-1.41988	1690.3	168.471
2SMBT4-341	0.103669	4.50863	3.6242	6.27326	0.2532	4.64338	0.696675	0.0575142	8.65509	1454.96	60.4796	1554.86	49.9631	1690.82	83.1582	1130.29	95.3672	13.9498	6.42526	1690.82	83.1582
2SMBT4-329	0.103674	5.24608	3.73366	6.27389	0.260791	3.95652	0.553815	0.0553712	9.37794	1493.89	52.7583	1578.61	50.2874	1690.91	96.7588	1089.29	99.6943	11.6522	5.36731	1690.91	96.7588
2SMBT4-152	0.103749	6.60945	4.4881	9.47623	0.313598	6.92196	0.716739	0.087036	7.96602	1758.39	106.536	1728.77	78.8457	1692.25	121.885	1686.81	129.33	-3.90843	-1.71323	1692.25	121.885
2SMBT4-244	0.103801	3.36819	3.90738	6.55358	0.272713	5.68931	0.857883	0.0657872	4.40618	1554.56	78.5914	1615.21	53.0321	1693.17	62.1055	1287.8	55.0476	8.1866	3.75492	1693.17	62.1055
2SMBT4-48	0.103804	4.76531	3.72662	7.62638	0.259928	6.11463	0.781025	0.0708091	9.01495	1489.47	81.324	1577.1	61.1276	1693.22	87.8661	1382.81	120.852	12.0333	5.55643	1693.22	87.8661
2SMBT4-313	0.103821	6.22475	4.05915	8.00977	0.283088	5.26303	0.629909	0.0792476	8.34937	1606.9	74.8582	1646.14	65.3441	1693.52	114.772	1541.47	124.299	5.11471	2.3838	1693.52	114.772
2SMBT4-197	0.103824	4.30833	4.40181	5.33626	0.30735	4.33622	0.620522	0.0830515	5.73884	1727.65	65.7183	1712.68	44.1807	1693.58	79.4365	1612.58	89.1444	-2.01168	-0.874168	1693.58	79.4365
2SMBT4-128	0.103851	10.1794	4.41189	15.0458	0.307877	11.1734	0.736412	0.0839133	11.8775	1730.25	169.596	1714.57	125.174	1694.05	187.676	1628.66	186.716	-2.13681	-0.914353	1694.05	187.676
2SMBT4-151	0.103861	3.77364	4.49866	5.45548	0.313997	4.16187	0.723257	0.0808985	6.958	1760.35	64.114	1730.73	45.3501	1694.23	69.5723	1572.36	105.533	-3.90271	-1.71158	1694.23	69.5723
2SMBT4-322	0.103905	3.41193	3.97714	4.59237	0.277164	3.50447	0.6751	0.0844567	6.19249	1577.06	49.0274	1629.54	37.278	1695.01	62.8976	1638.79	97.7126	6.95847	3.22049	1695.01	62.8976
2SMBT4-349	0.10393	5.0384	4.34331	6.22157	0.302709	4.16353	0.591759	0.078227	9.8974	1704.73	62.3694	1701.62	51.3938	1695.46	92.8755	1522.35	145.662	-0.546823	-0.182453	1695.46	92.8755
2SMBT4-201	0.104006	4.62451	3.93546	6.56594	0.274296	5.15424	0.713478	0.0497651	9.15193	1562.57	71.5237	1621.01	53.2099	1696.8	85.2319	981.636	87.8828	7.91066	3.60476	1696.8	85.2319
2SMBT4-309	0.104009	8.01024	3.85865	11.0518	0.268614	7.89357	0.689417	0.0727723	10.8093	1533.76	107.754	1605.08	89.3517	1696.85	147.632	1419.83	148.754	9.61126	4.44295	1696.85	147.632
2SMBT4-08	0.104018	3.12026	4.11183	6.57427	0.28658	6.01599	0.880858	0.0682281	9.12802	1624.42	86.3894	1656.66	53.7455	1697.02	57.5062	1334.03	118.184	4.27836	1.94608	1697.02	57.5062
2SMBT4-295	0.104035	5.31572	4.10395	6.9998	0.285624	5.26836	0.657527	0.0839601	5.48501	1619.62	75.456	1655.09	57.2098	1697.31	97.965	1629.53	86.0549	4.57724	2.14296	1697.31	97.965
2SMBT4-221	0.104061	4.48783	4.30281	6.41645	0.299673	4.58981	0.714705	0.0871421	7.67721	1689.69	68.2248	1693.9	52.9132	1697.77	82.7028	1688.78	124.767	0.476246	0.24874	1697.77	82.7028
2SMBT4-178	0.104143	6.08684	4.41657	8.84548	0.307465	6.63588	0.725991	0.0860174	7.85382	1728.22	100.605	1715.45	73.3613	1699.22	112.149	1667.86	126.124	-1.70638	-0.744265	1699.22	112.149
2SMBT4-311	0.104143	3.54676	3.80115	4.63349	0.264272	3.3437	0.647714	0.0617359	6.83906	1511.66	45.0571	1592.99	37.2652	1699.24	65.3485	1210.82	80.5372	11.0389	5.10547	1699.24	65.3485
2SMBT4-18	0.104144	6.7909	3.88452	10.1576	0.270278	7.55854	0.743662	0.0845505	12.3633	1542.21	103.682	1610.47	82.202	1699.25	125.121	1640.54	195.756	9.24169	4.23836	1699.25	125.121
2SMBT4-160	0.104145	3.22983	4.49726	4.50567	0.313059	3.40243	0.699461	0.0870773	6.78112	1755.74	52.2948	1730.47	37.4445	1699.27	59.5088	1687.57	110.089	-3.32305	-1.46062	1699.27	59.5088
2SMBT4-104	0.104156	4.80109	4.70484	7.35555	0.327223	5.31908	0.758423	0.0885204	7.03275	1824.91	84.5433	1768.1	61.6708	1699.46	88.457	1714.39	115.929	-7.38144	-3.21271	1699.46	88.457
2SMBT4-290	0.104161	4.4499	3.85968	6.47148	0.268304	5.1773	0.729491	0.049912	4.83359	1532.19	70.6062	1605.29	52.2348	1699.55	81.9856	984.463	46.4981	9.84741	4.55402	1699.55	81.9856
2SMBT4-187	0.104188	3.71869	4.42828	5.31303	0.308139	4.27447	0.719291	0.0805029	7.32091	1731.54	64.9096	1717.64	44.037	1700.02	68.5096	1564.96	110.548	-1.85443	-0.809282	1700.02	68.5096
2SMBT4-124	0.104214	4.12877	4.18377	6.89854	0.290922	5.71248	0.801562	0.0511316	9.06717	1646.14	82.9933	1670.85	56.5925	1700.48	76.0601	1007.93	89.3465	3.19602	1.47891	1700.48	76.0601
2SMBT4-27	0.104221	3.62214	3.63139	5.57795	0.25237	4.27614	0.7605	0.079611	4.29875	1450.69	55.5502	1556.44	44.4368	1700.61	66.7259	1548.27	64.1728	14.6962	6.79444	1700.61	66.7259
2SMBT4-369	0.104232	5.10957	4.27777	6.28889	0.297369	3.31886	0.58589	0.086899	13.5612	1678.25	49.0397	1689.09	51.8021	1700.81	94.1245	1684.26	220.345	1.32652	0.642114	1700.81	94.1245
2SMBT4-303	0.104234	6.73879	3.41672	11.3948	0.237334	9.41523	0.806624	0.0534111	10.6259	1372.82	116.431	1508.25	89.7376	1700.84	124.136	1051.71	109.19	19.2856	8.97883	1700.84	124.136
2SMBT4-274	0.104241	7.65639	3.70406	10.4462	0.257324	7.37371	0.680764	0.0541429	8.95658	1476.13	97.2903	1572.24	83.71	1700.97	141.037	1065.75	93.1964	13.2179	6.11295	1700.97	141.037
2SMBT4-302	0.104289	7.84017	3.90942	11.6605	0.271416	8.87223	0.740498	0.0683182	12.0691	1547.99	122.11	1615.63	94.5547	1701.81	144.407	1335.74	156.604	9.03892	4.18703	1701.81	144.407
2SMBT4-220	0.104331	9.46477	3.89318	13.4901	0.270449	9.61446	0.712564	0.0248694	8.51044	1543.08	131.957	1612.27	109.405	1702.55	174.315	496.517	41.7842	9.36623	4.2913	1702.55	174.315
2SMBT4-131	0.104372	5.78123	4.47761	8.94649	0.31092	7.0831	0.763683	0.0862828	6.37	1745.23	108.307	1726.83	74.3899	1703.27	106.465	1672.8	102.526	-2.46347	-1.06556	1703.27	106.465
2SMBT4-365	0.104387	5.5555	4.37569	6.94992	0.30371	4.30811	0.601141	0.0892431	9.20849	1709.68	64.699	1707.76	57.5024	1703.54	102.304	1727.8	153.072	-0.3602	-0.112423	1703.54	102.304
2SMBT4-245	0.10441	3.64249	4.23377	5.04166	0.293766	3.59362	0.691714	0.0815642	4.00813	1660.32	52.6024	1680.59	41.434	1703.95	67.0729	1584.81	61.1872	2.5607	1.20624	1703.95	67.0729
2SMBT4-198	0.104433	4.90633	4.25471	5.84795	0.295345	4.36066	0.571388	0.0819626	6.00338	1668.18	64.0957	1684.65	48.1149	1704.35	90.3406	1592.25	92.1304	2.12229	0.977246	1704.35	90.3406
2SMBT4-16	0.104489	4.96117	4.02385	7.66679	0.27907	5.85133	0.762406	0.0851146	7.26005	1586.68	82.3029	1639.03	62.4303	1705.34	91.3393	1651.05	115.431	6.9584	3.19414	1705.34	91.3393
2SMBT4-248	0.104496	6.42288	3.84051	9.29716	0.266247	6.77845	0.72303	0.0530833	7.79165	1521.72	91.8848	1601.28	75.0356	1705.47	118.249	1045.42	79.5414	10.7739	4.96833	1705.47	118.249
2SMBT4-64	0.104497	11.8362	4.24971	17.2021	0.294443	12.775	0.725842	0.0854484	8.63101	1663.7	187.378	1683.68	142.32	1705.49	217.91	1657.27	137.8	2.45039	1.18698	1705.49	217.91
2SMBT4-392	0.104526	7.14105	3.67735	9.00771	0.254948	5.20047	0.610417	0.0508737	11.0827	1463.95	68.1089	1566.46	72.0289	1705.99	131.462	1002.97	108.736	14.1877	6.54459	1705.99	131.462
2SMBT4-180	0.104601	4.10805	4.65688	5.67002	0.322772	4.38122	0.693759	0.0933378	5.86482	1803.25	68.9193	1759.53	47.4295	1707.32	75.6139	1803.64	101.452	-5.61924	-2.48497	1707.32	75.6139
2SMBT4-171	0.104606	3.63932	4.21595	5.47177	0.292197	4.36282	0.748352	0.0815794	4.56429	1652.5	63.5985	1677.13	44.9369	1707.41	66.9856	1585.09	69.7041	3.21585	1.4686	1707.41	66.9856
2SMBT4-337	0.104617	6.60158	4.23947	8.91934	0.293483	6.29599	0.673243	0.0853953	12.2713	1658.91	92.0946	1681.7	73.4079	1707.59	121.506	1656.28	196.089	2.85064	1.35498	1707.59	121.506
2SMBT4-125	0.104673	3.10274	4.47087	5.69295	0.309527	4.98718	0.839234	0.087389	5.49392	1738.38	75.9935	1725.58	47.2733	1708.58	57.1009	1693.37	89.4395	-1.74419	-0.741611	1708.58	57.1009
2SMBT4-139	0.104685	4.64326	4.39886	7.49859	0.304566	6.05025	0.78551	0.0831135	6.53117	1713.91	91.0618	1712.13	62.1139	1708.79	85.4495	1613.74	101.553	-0.299656	-0.104256	1708.79	85.4495
2SMBT4-260	0.10471	7.91004	4.22689	11.5344	0.292386	8.43501	0.72782	0.0849107	8.71591	1653.44	123.033	1679.26	94.9876	1709.22	145.56	1647.25	138.351	3.26342	1.53732	1709.22	145.56
2SMBT4-15	0.104743	10.9877	3.51014	16.7606	0.242862	12.6594	0.755138	0.0444623	6.68297	1401.56	159.498	1529.5	133.209	1709.81	202.18	879.276	57.5839	18.0283	8.36506	1709.81	202.18
2SMBT4-306	0.104762	4.44533	4.18995	6.40687	0.289579	5.06128	0.723218	0.0843954	7.60974	1639.43	73.2683	1672.06	52.5665	1710.14	81.7934	1637.65	120.062	4.13488	1.95149	1710.14	81.7934
2SMBT4-172	0.104841	13.2017	4.28798	19.5949	0.296526	14.5607	0.738989	0.0659044	4.40127	1674.06	214.756	1691.06	162.717	1711.52	242.867	1290.02	55.0782	2.18866	1.00506	1711.52	242.867
2SMBT4-122	0.104869	3.96827	4.27661	6.45858	0.295509	5.64265	0.793085	0.0701772	7.92783	1669	82.9767	1688.87	53.1996	1712.02	72.9985	1370.88	105.351	2.51248	1.17639	1712.02	72.9985
2SMBT4-229	0.104886	4.11606	4.10118	5.70295	0.283355	3.9584	0.692164	0.0667931	13.9462	1608.24	56.3421	1654.54	46.5878	1712.31	75.7144	1306.86	177.265	6.0782	2.79859	1712.31	75.7144
2SMBT4-238	0.104895	3.01674	4.27016	4.89805	0.294962	3.72223	0.78833	0.0777213	10.5536	1666.28	54.6563	1687.63	40.3182	1712.48	55.4914	1512.86	154.42	2.69775	1.26514	1712.48	55.4914
2SMBT4-256	0.104934	3.05922	4.05627	4.38141	0.279999	3.2009	0.716024	0.0750052	8.61145	1591.36	45.1382	1645.56	35.7042	1713.15	56.268	1461.86	121.809	7.1096	3.29391	1713.15	56.268
2SMBT4-44	0.10497	5.37238	3.84535	8.41911	0.265239	6.62979	0.770134	0.0806985	6.32014	1516.59	89.6006	1602.29	67.9445	1713.78	98.8061	1568.62	95.6156	11.5063	5.3489	1713.78	98.8061
2SMBT4-232	0.10505	4.54624	4.15625	6.62216	0.286694	4.82412	0.727114	0.0753732	9.87231	1624.99	69.2941	1665.44	54.2513	1715.19	83.5975	1468.78	140.345	5.25875	2.42896	1715.19	83.5975
2SMBT4-184	0.105094	10.4782	4.41711	14.9145	0.304716	10.7968	0.711736	0.0871377	11.0677	1714.65	162.587	1715.55	124.098	1715.96	192.658	1688.7	180.106	0.0761001	0.0526997	1715.96	192.658
2SMBT4-292	0.105124	3.2382	4.14847	4.1558	0.285733	3.39274	0.648794	0.0780252	4.94409	1620.17	48.6057	1663.91	34.0139	1716.48	59.5354	1518.56	72.4578	5.61086	2.62841	1716.48	59.5354
2SMBT4-186	0.105138	12.3589	4.62223	17.0767	0.31873	11.9474	0.690147	0.0919476	9.08233	1783.52	186.201	1753.29	143.501	1716.73	227.216	1777.93	155.173	-3.89108	-1.72439	1716.73	227.216
2SMBT4-368	0.10514	4.95867	3.7028	5.84512	0.255176	3.27095	0.530259	0.063693	8.78659	1465.11	42.8679	1571.97	46.7632	1716.76	91.1636	1248.04	106.624	14.6582	6.79793	1716.76	91.1636
2SMBT4-117	0.105183	4.84103	3.61281	9.89501	0.24887	9.02979	0.873044	0.0393518	12.6346	1432.65	116.011	1552.36	78.8492	1717.52	88.9924	780.136	96.9209	16.5863	7.71144	1717.52	88.9924
2SMBT4-255	0.105219	4.62178	4.07458	6.8828	0.280504	5.14003	0.74103	0.0597633	4.9014	1593.9	72.5871	1649.23	56.1721	1718.15	84.9553	1173.23	55.9449	7.23164	3.35503	1718.15	84.9553
2SMBT4-293	0.105235	5.15956	4.13818	7.32872	0.284722	5.64048	0.712478	0.0770123	7.37883	1615.1	80.5878	1661.88	60.0016	1718.42	94.8373	1499.56	106.928	6.01269	2.81455	1718.42	94.8373
2SMBT4-150	0.105236	11.3998	4.4104	16.4266	0.303808	11.9028	0.720006	0.0869725	12.428	1710.16	178.84	1714.3	136.786	1718.45	209.537	1685.63	201.998	0.482141	0.240961	1718.45	209.537
2SMBT4-268	0.105291	11.1645	4.26141	16.7731	0.293114	12.5867	0.746304	0.0832511	5.91265	1657.07	183.97	1685.94	138.799	1719.41	205.188	1616.31	92.0547	3.62555	1.71249	1719.41	205.188
2SMBT4-118	0.105312	4.10483	4.25827	6.64946	0.292977	5.86747	0.791902	0.0835618	6.16684	1656.39	85.7112	1685.33	54.7302	1719.77	75.4377	1622.1	96.3531	3.68556	1.7174	1719.77	75.4377
2SMBT4-357	0.105316	4.43306	3.85295	5.46149	0.265034	3.73908	0.591465	0.050186	10.4213	1515.55	50.5	1603.89	44.0556	1719.83	81.4694	989.739	100.911	11.8783	5.50784	1719.83	81.4694
2SMBT4-265	0.105378	5.95618	3.92329	8.44232	0.269643	6.1263	0.708894	0.0721848	6.06581	1538.99	83.8781	1618.5	68.4137	1720.92	109.446	1408.76	82.7118	10.5719	4.9124	1720.92	109.446
2SMBT4-107	0.105401	4.02231	4.304	6.52932	0.295822	5.15454	0.787719	0.0882788	7.41368	1670.56	75.8601	1694.13	53.8485	1721.31	73.9071	1709.9	121.92	2.94864	1.39114	1721.31	73.9071
2SMBT4-283	0.105471	6.52125	3.87973	9.1749	0.26636	6.67422	0.70382	0.0679397	10.3279	1522.3	90.5021	1609.47	74.2009	1722.54	119.805	1328.58	133.24	11.6248	5.41643	1722.54	119.805
2SMBT4-316	0.10556	4.9174	3.84721	6.19967	0.263889	4.33382	0.614798	0.0490345	7.97708	1509.71	58.3329	1602.68	50.0038	1724.09	90.3226	967.564	75.5059	12.4346	5.80125	1724.09	90.3226
2SMBT4-243	0.105615	14.6371	3.91289	22.1915	0.268413	16.6593	0.751632	0.084345	13.7486	1532.74	227.351	1616.35	181.368	1725.04	268.822	1636.71	217.318	11.1477	5.17278	1725.04	268.822
2SMBT4-315	0.105629	5.20402	3.72623	7.06134	0.255423	5.22567	0.6787	0.0693956	8.32046	1466.38	68.5405	1577.02	56.5876	1725.29	95.5731	1356.11	109.428	15.0064	7.01548	1725.29	95.5731
2SMBT4-252	0.105646	7.92377	4.44822	11.199	0.305001	7.92611	0.706673	0.084303	13.6441	1716.06	119.431	1721.37	93.1015	1725.58	145.517	1635.92	215.558	0.551843	0.308387	1725.58	145.517
2SMBT4-305	0.105671	4.15912	4.20801	5.77971	0.288325	4.52065	0.699307	0.0837415	6.05031	1633.15	65.2215	1675.58	47.4523	1726.02	76.3764	1625.46	94.7161	5.38027	2.53222	1726.02	76.3764
2SMBT4-17	0.105699	14.2015	4.12701	20.7005	0.282937	15.0632	0.727559	0.0862946	15.9763	1606.14	214.23	1659.67	170.785	1726.5	260.774	1673.02	258.164	6.9717	3.2253	1726.5	260.774
2SMBT4-30	0.105772	2.60367	4.00279	4.89624	0.274073	4.16521	0.846897	0.0860408	3.0276	1561.44	57.7614	1634.76	39.7984	1727.78	47.8024	1668.29	48.5392	9.62733	4.48505	1727.78	47.8024
2SMBT4-351	0.105777	5.97261	4.28953	8.15863	0.293754	5.77112	0.681722	0.0857674	9.34333	1660.26	84.4765	1691.35	67.2782	1727.86	109.654	1663.2	149.73	3.91212	1.83817	1727.86	109.654
2SMBT4-312	0.105884	4.73722	4.15023	8.53354	0.283799	7.25745	0.831969	0.0793721	5.24393	1610.47	103.432	1664.26	69.9344	1729.71	86.9527	1543.8	78.092	6.89405	3.23196	1729.71	86.9527
2SMBT4-257	0.105889	4.97962	4.28455	7.18187	0.293086	5.21445	0.720612	0.0785658	9.67376	1656.93	76.1928	1690.4	59.1911	1729.8	91.401	1528.69	142.933	4.21238	1.97977	1729.8	91.401
2SMBT4-69	0.105908	3.76192	4.27365	6.56951	0.292167	6.19911	0.827934	0.0872144	7.97937	1652.35	90.3626	1688.3	54.108	1730.12	69.0472	1690.12	129.792	4.49523	2.12936	1730.12	69.0472
2SMBT4-280	0.105995	6.09492	3.99359	8.86813	0.272833	6.6625	0.726802	0.0473832	8.7656	1555.17	92.0683	1632.89	72.1344	1731.63	111.847	935.722	80.3114	10.1907	4.76009	1731.63	111.847
2SMBT4-263	0.106076	8.25699	4.346	12.0731	0.296739	8.8463	0.729566	0.0864506	10.2593	1675.12	130.515	1702.14	99.9792	1733.03	151.497	1675.92	165.679	3.34201	1.58741	1733.03	151.497
2SMBT4-183	0.106157	4.83326	4.59425	6.9695	0.313762	5.39774	0.722352	0.0876942	6.66192	1759.19	83.107	1748.22	58.1808	1734.44	88.6637	1699.04	108.855	-1.42727	-0.627418	1734.44	88.6637
2SMBT4-204	0.106225	3.85808	4.44194	4.99311	0.303121	3.91699	0.649076	0.062714	11.0239	1706.77	58.7372	1720.2	41.4058	1735.62	70.7641	1229.43	131.921	1.66224	0.780812	1735.62	70.7641
2SMBT4-231	0.106262	4.06378	4.47884	5.56293	0.305424	3.8104	0.682903	0.0855135	9.14194	1718.15	57.4714	1727.06	46.2072	1736.26	74.5312	1658.48	146.09	1.04303	0.515745	1736.26	74.5312
2SMBT4-258	0.106274	2.19219	4.23546	3.63597	0.288672	2.97025	0.798027	0.0819247	3.4428	1634.89	42.8924	1680.92	29.8759	1736.47	40.2045	1591.54	52.7607	5.84966	2.73838	1736.47	40.2045
2SMBT4-249	0.106398	9.27648	4.59067	13.2335	0.312558	9.4479	0.713175	0.0854399	7.1546	1753.28	145.057	1747.57	110.773	1738.61	170.085	1657.11	114.151	-0.844224	-0.326724	1738.61	170.085
2SMBT4-237	0.10668	4.74664	3.98517	6.98958	0.270673	5.02876	0.734191	0.0512555	10.7431	1544.22	69.0569	1631.18	56.7937	1743.46	86.9779	1010.31	106.149	11.4279	5.3313	1743.46	86.9779
2SMBT4-240	0.106789	3.04112	4.32864	4.39507	0.293691	3.0633	0.722403	0.0848493	9.07821	1659.95	44.8306	1698.83	36.2673	1745.32	55.7131	1646.11	144.026	4.89121	2.28892	1745.32	55.7131
2SMBT4-208	0.107174	6.70614	4.44219	9.11444	0.300443	6.58765	0.678665	0.0815578	11.9346	1693.51	98.119	1720.24	75.6809	1751.91	122.756	1584.69	182.725	3.33352	1.55428	1751.91	122.756
2SMBT4-273	0.107347	4.82573	4.40993	7.07182	0.297499	5.53091	0.73266	0.0800723	6.12458	1678.89	81.7553	1714.21	58.598	1754.87	88.3032	1556.91	91.983	4.32937	2.05999	1754.87	88.3032
2SMBT4-211	0.107396	7.1748	4.64659	10.4237	0.313605	7.77653	0.725693	0.0855552	10.7046	1758.42	119.694	1757.68	87.3105	1755.69	131.274	1659.25	171.245	-0.155281	-0.04213	1755.69	131.274
2SMBT4-246	0.107621	4.37692	4.12945	6.85514	0.277975	5.34781	0.769703	0.0693487	11.1392	1581.15	74.9888	1660.15	56.0931	1759.52	80.045	1355.22	146.542	10.1372	4.75844	1759.52	80.045
2SMBT4-109	0.107739	4.64301	4.34224	6.35229	0.291982	4.34858	0.682466	0.0894144	8.52823	1651.43	63.3549	1701.42	52.4731	1761.53	84.8905	1730.98	141.975	6.2501	2.93836	1761.53	84.8905
2SMBT4-70	0.109005	6.11687	4.44513	9.80739	0.295257	8.26968	0.78391	0.0882023	8.49213	1667.75	121.535	1720.79	81.4686	1782.85	111.547	1708.48	139.605	6.45634	3.08262	1782.85	111.547
2SMBT4-209	0.109486	3.51514	4.40038	4.92967	0.291327	3.90451	0.706325	0.045546	11.4149	1648.16	56.7859	1712.41	40.8082	1790.87	64.0396	900.237	100.757	7.96902	3.75216	1790.87	64.0396
2SMBT4-307	0.110331	7.99508	4.53089	11.5557	0.297335	8.59895	0.722346	0.0762306	13.0248	1678.08	127.061	1736.66	96.4086	1804.88	145.371	1484.89	187.335	7.02523	3.37313	1804.88	145.371
2SMBT4-344	0.110823	5.2702	4.79134	6.9938	0.313145	4.86551	0.658441	0.0962633	8.59108	1756.16	74.7994	1783.38	58.8175	1812.95	95.7365	1857.65	153.056	3.13229	1.52626	1812.95	95.7365
2SMBT4-376	0.110893	4.7493	4.75475	6.28387	0.310699	3.85575	0.656196	0.0961036	7.61756	1744.14	58.9218	1776.95	52.7654	1814.1	86.2627	1854.71	135.448	3.85627	1.84594	1814.1	86.2627
2SMBT4-251	0.111874	5.86027	4.23027	9.99817	0.273913	8.11246	0.810215	0.0860198	7.26223	1560.63	112.457	1679.91	82.2894	1830.08	106.247	1667.9	116.6	14.723	7.10033	1830.08	106.247
2SMBT4-217	0.11271	5.0014	4.46824	9.30641	0.287329	7.81215	0.843327	0.0930596	9.13284	1628.17	112.415	1725.09	77.3642	1843.57	90.4885	1798.5	157.772	11.684	5.61836	1843.57	90.4885
2SMBT4-333	0.115109	4.36314	5.17199	5.42227	0.325389	3.76533	0.601023	0.0989275	8.38863	1815.99	59.5928	1848.02	46.1682	1881.58	78.5908	1906.71	153.214	3.48594	1.73291	1881.58	78.5908
2SMBT4-269	0.13074	3.68148	6.56536	5.38863	0.363682	4.14955	0.731266	0.104602	4.89724	1999.6	71.342	2054.71	47.5175	2107.92	64.5934	2010.81	93.9523	5.1387	2.68196	2107.92	64.5934
2SMBT4-40	0.148944	3.95027	8.16863	6.35982	0.397119	5.22073	0.78455	0.119708	5.44687	2155.76	95.6684	2249.87	57.595	2333.83	67.6525	2285.35	118.045	7.63021	4.18315	2333.83	67.6525
2SMBT4-45	0.164657	3.28875	8.82862	5.68813	0.388217	4.845	0.816665	0.12041	4.96105	2114.56	87.3486	2320.45	51.9252	2504.05	55.3353	2298.03	108.052	15.5546	8.87319	2504.05	55.3353
2SMBT4-308	0.180836	11.0654	10.7268	16.4661	0.429485	12.3701	0.740618	0.131797	6.47642	2303.4	239.695	2499.75	154.109	2660.55	183.352	2502.4	153.013	13.4241	7.85489	2660.55	183.352
2SMBT4-345	0.184134	5.14968	12.3908	6.8678	0.487403	4.96587	0.664241	0.141183	9.7781	2559.43	104.909	2634.48	64.6139	2690.46	85.0893	2669.33	246	4.87024	2.84876	2690.46	85.0893
2SMBT4-35	0.185956	3.53051	12.538	5.86684	0.488253	4.80734	0.79893	0.152403	3.9641	2563.11	101.678	2645.58	55.225	2706.72	58.2469	2867.08	106.24	5.30576	3.11732	2706.72	58.2469
2SMBT4-215	0.188625	8.06054	13.6394	11.5889	0.524098	8.29247	0.718494	0.140607	10.1969	2716.54	183.874	2725	110.063	2730.21	132.695	2659.13	255.679	0.500887	0.310544	2730.21	132.695
2SMBT4-379	0.205728	12.0782	12.6695	12.8537	0.446263	4.15579	0.342636	0.32725	20.3961	2378.62	82.6684	2655.39	121.544	2872.19	196.334	5722.27	1042.91	17.1846	10.4232	2872.19	196.334
2SMBT4-377	0.206751	4.66352	14.7562	6.15962	0.517184	3.75874	0.654805	0.154433	7.37641	2687.23	82.6022	2799.65	58.6393	2880.25	75.7537	2902.66	200.438	6.70158	4.01547	2880.25	75.7537
2SMBT4-42	0.214169	5.45689	13.9169	7.59064	0.470499	5.50032	0.695717	0.147735	11.1607	2485.75	113.461	2744.07	72.0277	2937.36	88.2134	2785.06	292.475	15.3747	9.41369	2937.36	88.2134
Rejected data
Analysis_name	bias_corr_samples_Pb207_Pb206	bias_corr_samples_Pb207_Pb206_err	bias_corr_samples_Pb207_U235	bias_corr_samples_Pb207_U235_err	bias_corr_samples_Pb206_U238	bias_corr_samples_Pb206_U238_err	rho	bias_corr_samples_Pb208_Th232	bias_corr_samples_Pb208_Th232_err	samples_Pb206_U238_age,	samples_Pb206_U238_age_err	samples_Pb207_U235_age	samples_Pb207_U235_age_err	samples_Pb207_Pb206_age	samples_Pb207_Pb206_age_err	samples_Pb208_Th232_age	samples_Pb208_Th232_age_err	discordance_Pb206U238_Pb207Pb206	discordance_Pb206U238_Pb207U235	best_age	best_age_err
2SMBT4-277	0.0901588	4.68963	0.910437	17.9316	0.0731259	17.4189	0.965216	0.00804874	24.5084	454.96	76.5208	657.29	86.9815	1428.9	89.5218	162.032	39.5913	68.16	30.7824	454.96	76.5208
2SMBT4-193	0.100745	7.11449	1.18164	12.7216	0.0850309	10.7915	0.829222	0.0159087	12.3615	526.082	54.5188	792.078	70.075	1637.87	132.137	319.019	39.1638	67.8801	33.582	526.082	54.5188
2SMBT4-142	0.0579668	14.9864	0.730617	21.4479	0.0913601	15.3727	0.715383	0.0273972	15.5442	563.576	82.9623	556.915	92.1923	528.506	328.394	546.308	83.9561	-6.6357	-1.19601	563.576	82.9623
2SMBT4-89	0.103635	11.3753	1.41216	23.2712	0.0986836	20.2737	0.872388	0.0185075	23.8378	606.69	117.401	894.066	139.198	1690.22	209.825	370.658	87.7417	64.1058	32.1426	606.69	117.401
2SMBT4-26	0.0918572	3.37771	1.42982	6.65873	0.112746	5.76381	0.861802	0.023135	9.31203	688.674	37.6476	901.475	39.8063	1464.43	64.1687	462.283	42.6043	52.9734	23.6059	688.674	37.6476
2SMBT4-07	0.106084	19.4095	1.76728	37.1116	0.120781	31.6741	0.852332	0.0171218	38.801	735.056	220.125	1033.52	245.318	1733.18	356.112	343.14	132.451	57.5891	28.8786	735.056	220.125
2SMBT4-116	0.101312	6.53391	1.96757	16.8392	0.140713	15.7458	0.921748	0.00538539	21.0684	848.695	125.226	1104.48	113.84	1648.29	121.161	108.559	22.8231	48.5107	23.1585	848.695	125.226
2SMBT4-25	0.102802	5.70684	2.01452	12.5976	0.141943	11.2439	0.891507	0.066839	9.54048	855.641	90.1014	1120.42	85.6845	1675.32	105.463	1307.73	121.176	48.9266	23.6319	855.641	90.1014
2SMBT4-65	0.0936472	3.43489	1.83982	8.16861	0.142243	8.02186	0.910137	0.0185901	20.0574	857.334	64.3992	1059.8	53.7859	1501.01	64.9388	372.298	74.1255	42.8828	19.104	857.334	64.3992
2SMBT4-342	0.10205	15.8058	2.03975	26.9292	0.144767	21.8607	0.809634	0.0132916	24.9908	871.564	178.257	1128.88	185.519	1661.74	292.594	266.883	66.3666	47.551	22.7938	871.564	178.257
2SMBT4-57	0.100094	3.53514	2.00171	10.1561	0.144788	9.57948	0.937483	0.0135483	18.2223	871.681	78.1068	1116.09	68.8742	1625.83	65.759	272.004	49.2933	46.3854	21.8987	871.681	78.1068
2SMBT4-38	0.102041	7.62843	2.12649	16.7579	0.150902	14.9596	0.890385	0.0602293	14.7494	906.017	126.459	1157.45	116.238	1661.58	141.219	1182.12	170.068	45.4726	21.7229	906.017	126.459
2SMBT4-348	0.10338	10.4307	2.17254	19.4387	0.152221	16.5251	0.843865	0.0182794	24.406	913.4	140.757	1172.29	135.97	1685.66	192.511	366.131	88.748	45.8137	22.0844	913.4	140.757
2SMBT4-141	0.100425	7.12403	2.13583	16.2723	0.154159	14.6607	0.899074	0.0246077	19.2671	924.233	126.25	1160.48	113.001	1631.96	132.414	491.355	93.7452	43.3667	20.3574	924.233	126.25
2SMBT4-372	0.100094	4.10656	2.22462	6.04481	0.161045	4.24762	0.734501	0.0180189	7.44147	962.58	37.981	1188.83	42.3684	1625.84	76.3881	360.96	26.6399	40.7948	19.031	962.58	37.981
2SMBT4-264	0.101697	6.29311	2.27495	9.75552	0.162016	7.49949	0.764127	0.0301544	6.23261	967.973	67.4082	1204.55	68.9149	1655.32	116.592	600.479	36.9087	41.5235	19.6404	967.973	67.4082
2SMBT4-14	0.0947959	4.12449	2.13295	8.89527	0.163068	7.88582	0.886007	0.0198688	12.2141	973.801	71.2763	1159.54	61.567	1524.02	77.7401	397.656	48.1526	36.1032	16.0184	973.801	71.2763
2SMBT4-93	0.0986351	8.12282	2.22416	15.4471	0.163319	13.0961	0.850583	0.0256295	18.6796	975.193	118.534	1188.68	108.612	1598.48	151.627	511.503	94.569	38.9924	17.96	975.193	118.534
2SMBT4-06	0.0905212	7.37933	2.06001	11.089	0.165	8.43905	0.746568	0.0280648	6.79721	984.505	77.0532	1135.62	75.941	1436.55	140.72	559.438	37.5396	31.4674	13.3072	984.505	77.0532
2SMBT4-343	0.102992	4.55731	2.37448	12.3741	0.166985	11.6139	0.929751	0.0174823	23.513	995.478	107.14	1234.95	88.6351	1678.72	84.1839	350.304	81.8225	40.7003	19.3913	995.478	107.14
2SMBT4-384	0.0858168	23.0563	2.0257	32.9571	0.171058	23.5055	0.714549	0.0337842	14.6626	1017.94	221.424	1124.17	227.787	1334.06	445.907	671.573	97.085	23.6961	9.45014	1334.06	445.907
2SMBT4-325	0.0882506	3.14126	2.09341	4.41018	0.17177	3.28808	0.703179	0.0417139	9.36612	1021.86	31.072	1146.64	30.3132	1387.94	60.3002	826.02	75.9489	26.3763	10.8828	1387.94	60.3002
2SMBT4-391	0.0886728	15.1636	2.60642	20.9158	0.213008	14.2982	0.688788	0.0188145	10.3572	1244.82	161.891	1302.45	154.673	1397.1	290.717	376.751	38.6964	10.8995	4.42432	1397.1	290.717
2SMBT4-157	0.0890273	10.0505	2.07725	16.8974	0.169152	13.6884	0.8039	0.0448986	16.0905	1007.44	127.683	1141.33	116.324	1404.75	192.488	887.718	140.232	28.2835	11.7312	1404.75	192.488
2SMBT4-13	0.0896393	2.86325	2.26061	5.52845	0.182777	4.53516	0.856185	0.0232405	5.9808	1082.13	45.179	1200.09	38.9379	1417.86	54.7393	464.366	27.4749	23.6786	9.8297	1417.86	54.7393
2SMBT4-235	0.08973	19.6135	2.44459	29.0493	0.197407	21.404	0.737652	0.0483222	11.8704	1161.38	227.571	1255.83	212.375	1419.79	374.871	953.835	110.898	18.2007	7.52122	1419.79	374.871
2SMBT4-259	0.0899734	21.4112	2.25736	35.0391	0.181725	27.7437	0.791581	0.0721657	14.7802	1076.39	275.197	1199.08	251.582	1424.97	408.942	1408.4	202.085	24.462	10.2322	1424.97	408.942
2SMBT4-49	0.0902422	6.52848	2.27723	9.53301	0.182704	7.03942	0.728768	0.0407118	7.80225	1081.73	70.1042	1205.26	67.3591	1430.66	124.594	806.566	61.7856	24.3895	10.2492	1430.66	124.594
2SMBT4-393	0.0915148	16.0455	2.48688	23.8922	0.196926	17.6148	0.740944	0.019728	15.0033	1158.78	186.876	1268.22	174.728	1457.34	305.125	394.865	58.7531	20.4862	8.62919	1457.34	305.125
2SMBT4-360	0.0915894	16.7423	2.89601	25.3713	0.229073	19.1327	0.751366	0.0565521	38.4079	1329.64	229.971	1380.87	193.813	1458.89	318.301	1111.89	419.851	8.85938	3.71024	1458.89	318.301
2SMBT4-236	0.0918842	6.69523	2.48444	11.2633	0.195919	9.00004	0.804165	0.0238019	19.3824	1153.36	95.0536	1267.51	81.7198	1464.99	127.184	475.454	91.2846	21.2721	9.00594	1464.99	127.184
2SMBT4-367	0.09285	16.9131	2.74819	26.085	0.214455	19.8871	0.761315	0.0789547	24.0994	1252.51	226.476	1341.6	196.62	1484.83	320.438	1535.98	359.628	15.6465	6.64077	1484.83	320.438
2SMBT4-228	0.0942683	4.79773	2.58202	6.94183	0.19849	5.02574	0.722728	0.0180757	15.8326	1167.2	53.6577	1295.56	50.8509	1513.5	90.5548	362.088	56.8977	22.8803	9.90722	1513.5	90.5548
2SMBT4-347	0.0947175	22.0929	3.63523	32.3843	0.277995	23.7626	0.731162	0.0834081	16.6675	1581.26	333.508	1557.28	263.654	1522.46	416.5	1619.24	261.038	-3.86165	-1.53958	1522.46	416.5
2SMBT4-99	0.0952907	7.03732	2.68713	13.6267	0.20426	11.4668	0.856456	0.062695	6.91004	1198.16	125.394	1324.92	101.171	1533.83	132.472	1229.07	82.5669	21.8841	9.56724	1533.83	132.472
2SMBT4-74	0.0969242	16.8824	3.35736	27.1594	0.250809	21.4997	0.783375	0.0746819	12.7129	1442.65	278.081	1494.51	215.669	1565.75	316.476	1455.78	179.358	7.86218	3.46993	1565.75	316.476
2SMBT4-275	0.0983191	6.38501	2.55629	14.1827	0.188282	12.816	0.892993	0.0171583	34.6881	1112.06	130.924	1288.23	103.876	1592.49	119.28	343.866	118.619	30.1683	13.6755	1592.49	119.28
2SMBT4-310	0.0983775	22.1584	2.80826	37.0248	0.206684	29.7008	0.801143	0.0413367	21.2967	1211.13	328.227	1357.74	284.44	1593.59	413.887	818.701	171.599	24.0003	10.7985	1593.59	413.887
2SMBT4-304	0.0986848	12.9192	2.98307	16.7324	0.218864	10.8299	0.635603	0.0313167	7.59156	1275.87	125.376	1403.31	127.916	1599.42	241.131	623.271	46.6477	20.229	9.08157	1599.42	241.131
2SMBT4-205	0.098763	3.67578	2.66565	4.63613	0.195647	3.64401	0.629249	0.0324892	11.1764	1151.9	38.4391	1318.99	34.2454	1600.9	68.5937	646.236	71.209	28.0468	12.6682	1600.9	68.5937
2SMBT4-199	0.0988242	19.8876	4.22712	29.216	0.310082	21.6089	0.732586	0.0812037	7.68616	1741.11	329.996	1679.3	244.521	1602.05	371.069	1578.07	117.017	-8.68001	-3.68055	1602.05	371.069
2SMBT4-21	0.0989661	7.75754	2.90098	10.1021	0.212374	6.48048	0.640555	0.0431193	10.0595	1241.45	73.1827	1382.17	76.4244	1604.73	144.692	853.27	84.2238	22.6378	10.1808	1604.73	144.692
2SMBT4-144	0.0990196	4.55817	2.87172	6.69884	0.210221	4.99964	0.732925	0.0274642	6.19714	1229.99	55.986	1374.52	50.4923	1605.74	85.0072	547.627	33.5094	23.3999	10.5148	1605.74	85.0072
2SMBT4-28	0.0990861	8.17465	2.73045	14.6646	0.19958	12.1868	0.830218	0.0228395	31.1341	1173.06	130.724	1336.78	109.408	1606.99	152.428	456.444	141.008	27.0023	12.2472	1606.99	152.428
2SMBT4-158	0.0996772	4.52257	2.88723	7.51466	0.20999	6.23525	0.799206	0.0238829	10.5294	1228.77	69.7601	1378.58	56.7326	1618.07	84.2101	477.052	49.7036	24.0596	10.8674	1618.07	84.2101
2SMBT4-182	0.100032	16.3824	2.95438	26.2665	0.214123	20.6269	0.781674	0.0515973	8.46	1250.74	234.609	1395.97	201.879	1624.68	304.782	1016.88	84.0747	23.0158	10.4034	1624.68	304.782
2SMBT4-58	0.100102	3.73499	2.7952	6.00546	0.202166	4.81992	0.783308	0.0176602	8.96591	1186.95	52.2531	1354.25	44.9404	1625.98	69.4751	353.837	31.4731	27.001	12.3541	1625.98	69.4751
2SMBT4-77	0.100667	9.79276	3.0809	17.4285	0.221606	14.7466	0.827429	0.046671	8.38213	1290.36	172.49	1427.95	134.381	1636.44	181.914	921.973	75.6865	21.1484	9.63584	1636.44	181.914
2SMBT4-289	0.100693	8.24167	3.01403	11.5181	0.216737	8.33473	0.699005	0.0381792	7.06676	1264.61	95.7145	1411.17	88.0368	1636.91	153.091	757.319	52.5961	22.7442	10.386	1636.91	153.091
2SMBT4-83	0.100896	3.69583	2.44096	7.20602	0.175193	6.15824	0.858469	0.00353306	11.569	1040.66	59.1826	1254.76	51.95	1640.65	68.6183	71.2853	8.23417	36.5704	17.0631	1640.65	68.6183
2SMBT4-153	0.100951	4.24368	3.02637	6.99182	0.217325	5.71629	0.795059	0.0337213	8.37278	1267.73	65.7887	1414.29	53.4108	1641.68	78.7583	670.342	55.2813	22.7786	10.3633	1641.68	78.7583
2SMBT4-324	0.100986	5.91706	3.15075	8.53985	0.225924	6.25673	0.721148	0.0492173	9.1464	1313.1	74.3334	1445.18	65.9139	1642.31	109.806	971.085	86.906	20.0453	9.13945	1642.31	109.806
2SMBT4-110	0.101121	17.0588	4.47525	24.7472	0.320626	17.9422	0.724453	0.0907484	19.5889	1792.78	280.988	1726.39	208.257	1644.79	316.469	1755.72	332.125	-8.99782	-3.84567	1644.79	316.469
2SMBT4-326	0.101253	6.01992	2.42655	8.80316	0.173539	6.51809	0.729714	0.0281815	10.8042	1031.58	62.1373	1250.5	63.3818	1647.21	111.645	561.733	59.9439	37.3741	17.5064	1647.21	111.645
2SMBT4-233	0.101379	20.454	3.23211	31.3284	0.231017	23.7317	0.757454	0.0126711	30.2985	1339.83	287.285	1464.89	247.741	1649.52	379.226	254.503	76.7728	18.7748	8.53765	1649.52	379.226
2SMBT4-43	0.101503	16.82	3.81796	23.6924	0.272345	16.758	0.704275	0.0832904	16.7374	1552.7	231.335	1596.54	192.926	1651.79	311.762	1617.04	261.796	5.99907	2.74608	1651.79	311.762
2SMBT4-203	0.101656	18.255	2.37989	26.7368	0.169706	19.6583	0.730651	0.010743	18.0752	1010.49	183.909	1236.58	193.466	1654.58	338.239	215.983	38.8688	38.9275	18.2833	1654.58	338.239
2SMBT4-210	0.101662	11.4387	2.40131	14.8313	0.171212	9.61363	0.636629	0.0218415	9.96772	1018.79	90.6011	1242.99	106.71	1654.68	211.941	436.714	43.1094	38.43	18.0375	1654.68	211.941
2SMBT4-338	0.102038	7.70413	2.76584	9.83037	0.19631	6.39908	0.621814	0.0261911	12.2066	1155.47	67.6942	1346.37	73.4381	1661.52	142.621	522.568	63.0686	30.4572	14.1789	1661.52	142.621
2SMBT4-287	0.102182	6.37162	3.05014	14.3037	0.216139	12.9799	0.895386	0.0645919	10.9605	1261.44	148.736	1420.27	109.803	1664.13	117.915	1265.11	134.862	24.198	11.1827	1664.13	117.915
2SMBT4-34	0.102425	19.7711	2.79215	33.3178	0.197409	26.8204	0.804901	0.0484112	28.4927	1161.39	285.228	1353.44	254.278	1668.53	365.686	955.551	267.692	30.3945	14.19	1668.53	365.686
2SMBT4-47	0.102454	5.87601	3.21407	9.1654	0.227135	7.17023	0.767592	0.0679152	9.0962	1319.46	85.5595	1460.56	71.0958	1669.04	108.676	1328.11	117.264	20.9447	9.66015	1669.04	108.676
2SMBT4-250	0.102508	12.2758	2.67103	19.8455	0.188758	15.5994	0.785732	0.0360722	13.5211	1114.64	159.708	1320.48	147.648	1670.02	227.01	716.258	95.3747	33.2559	15.5878	1670.02	227.01
2SMBT4-188	0.10258	12.8718	3.10075	17.6427	0.219145	12.2251	0.683952	0.0115387	8.50366	1277.35	141.682	1432.88	136.268	1671.32	237.993	231.888	19.6158	23.572	10.8539	1671.32	237.993
2SMBT4-355	0.102938	3.99048	3.03495	5.66663	0.213581	4.47121	0.713955	0.029133	15.1785	1247.87	50.7279	1416.45	43.3044	1677.76	73.7221	580.429	87.0346	25.6231	11.9017	1677.76	73.7221
2SMBT4-165	0.103072	21.4102	3.59876	32.8879	0.25313	25.0358	0.759076	0.0417803	26.0137	1454.6	326.286	1549.26	267.334	1680.17	395.423	827.308	211.977	13.4257	6.11015	1680.17	395.423
2SMBT4-190	0.103261	7.52406	2.94436	12.0698	0.206717	9.71093	0.782238	0.0488389	5.81907	1211.3	107.248	1393.4	91.7325	1683.55	138.902	963.795	54.8421	28.0505	13.0683	1683.55	138.902
2SMBT4-336	0.103647	5.66148	2.97313	7.60104	0.207743	5.42117	0.668735	0.0268547	10.5933	1216.78	60.1141	1400.78	57.8167	1690.42	104.427	535.632	56.0737	28.0191	13.1351	1690.42	104.427
2SMBT4-321	0.103799	6.11832	3.33907	8.66723	0.23293	6.36551	0.708762	0.057241	6.42366	1349.84	77.5282	1490.24	67.8241	1693.14	112.815	1125.07	70.4183	20.2759	9.42121	1693.14	112.815
2SMBT4-270	0.1039	3.80194	2.76262	8.19195	0.192563	7.51806	0.886336	0.0269243	11.3241	1135.24	78.2593	1345.5	61.1466	1694.92	70.088	537.002	60.0995	33.0209	15.6267	1694.92	70.088
2SMBT4-320	0.103902	16.9598	3.77765	25.439	0.263258	19.0353	0.745346	0.0438766	11.1875	1506.49	255.856	1588.01	207.062	1694.97	312.649	867.939	95.2697	11.1197	5.13323	1694.97	312.649
2SMBT4-146	0.103903	5.2415	4.93454	7.17449	0.344264	5.09575	0.683363	0.086033	4.47408	1907.15	84.1313	1808.18	60.6452	1694.98	96.6252	1668.15	71.7648	-12.5177	-5.47319	1694.98	96.6252
2SMBT4-161	0.104071	7.47005	2.95309	12.9168	0.205717	10.6183	0.815832	0.0406915	14.9505	1205.96	116.801	1395.64	98.2827	1697.96	137.657	806.172	118.501	28.9757	13.5908	1697.96	137.657
2SMBT4-294	0.104341	7.11658	2.63187	15.4694	0.182634	13.9883	0.888045	0.0329255	24.1195	1081.35	139.278	1309.59	114.306	1702.73	131.065	654.776	155.998	36.4932	17.4284	1702.73	131.065
2SMBT4-297	0.104365	5.65912	3.38122	7.78288	0.234577	5.96347	0.690653	0.0339738	8.0024	1358.44	73.0472	1500.05	61.0621	1703.15	104.218	675.28	53.2158	20.2394	9.44028	1703.15	104.218
2SMBT4-242	0.104539	2.92763	3.31246	6.76844	0.229566	6.04619	0.901653	0.030256	18.0765	1332.22	72.7735	1483.99	52.8368	1706.23	53.8941	602.472	107.585	21.92	10.2271	1706.23	53.8941
2SMBT4-115	0.104728	11.7392	3.40643	17.3648	0.235667	13.0686	0.737036	0.0358636	14.9833	1364.13	160.707	1505.88	137.133	1709.54	216.015	712.188	105.124	20.2047	9.41291	1709.54	216.015
2SMBT4-276	0.104756	11.282	3.3395	18.211	0.230852	14.43	0.785018	0.0442697	14.1042	1338.96	174.509	1490.34	143.243	1710.04	207.59	875.55	121.216	21.7001	10.1571	1710.04	207.59
2SMBT4-300	0.105193	10.8716	2.46241	16.7409	0.169487	12.895	0.760506	0.0153106	13.5898	1009.28	120.485	1261.07	121.466	1717.7	199.848	307.116	41.4635	41.2422	19.9662	1717.7	199.848
2SMBT4-87	0.105208	6.03864	2.96286	9.22797	0.203944	6.94917	0.756169	0.0423723	9.12442	1196.47	75.8883	1398.15	70.1664	1717.96	111.002	838.79	75.1078	30.3552	14.4247	1717.96	111.002
2SMBT4-67	0.105274	19.7085	3.48975	28.8535	0.240008	21.2961	0.730409	0.0240652	13.3785	1386.74	265.868	1524.9	231.657	1719.11	362.228	480.651	63.6453	19.3339	9.06021	1719.11	362.228
2SMBT4-155	0.105375	8.36654	3.23288	14.5575	0.222412	12.0326	0.818388	0.054387	14.7423	1294.61	141.152	1465.08	113.362	1720.86	153.738	1070.43	154.288	24.7697	11.6355	1720.86	153.738
2SMBT4-22	0.105415	5.30356	3.40506	8.29868	0.233992	6.39247	0.769137	0.0626343	6.30814	1355.39	78.1442	1505.56	65.2241	1721.57	97.4462	1227.91	75.2926	21.2704	9.97478	1721.57	97.4462
2SMBT4-267	0.10606	4.94789	2.5917	10.1991	0.176975	9.01523	0.874492	0.0243279	12.356	1050.43	87.391	1298.29	74.862	1732.76	90.7853	485.835	59.4014	39.3783	19.0916	1732.76	90.7853
2SMBT4-129	0.106771	19.4414	4.51344	28.3327	0.306353	20.6961	0.727435	0.0910222	24.6741	1722.74	313.119	1733.45	239.872	1745.01	356.179	1760.79	420.415	1.27655	0.618105	1745.01	356.179
2SMBT4-318	0.11268	13.086	3.80071	21.667	0.244231	17.3996	0.797039	0.0722659	23.6668	1408.65	220.255	1592.9	175.915	1843.08	236.774	1410.29	324.991	23.5705	11.5665	1843.08	236.774
2SMBT4-330	0.113003	6.39532	3.71106	12.7764	0.237816	11.2317	0.865806	0.0469448	22.5791	1375.33	139.128	1573.76	102.539	1848.26	115.645	927.26	205.68	25.5878	12.6083	1848.26	115.645
2SMBT4-02	0.114446	12.2715	3.24516	18.6195	0.205656	14.0998	0.752105	0.0166891	21.3249	1205.63	155.072	1468.02	145.512	1871.17	221.307	334.54	70.8772	35.5681	17.8737	1871.17	221.307
Primary reference material
Analysis_name	bias_corr_pleis_Pb207_Pb206	bias_corr_pleis_Pb207_Pb206_err	bias_corr_pleis_Pb207_U235	bias_corr_pleis_Pb207_U235_err	bias_corr_pleis_Pb206_U238	bias_corr_pleis_Pb206_U238_err	rho	bias_corr_pleis_Pb208_Th232	bias_corr_pleis_Pb208_Th232_err	pleis_Pb206_U238_age,	pleis_Pb206_U238_age_err	pleis_Pb207_U235_age	pleis_Pb207_U235_age_err	pleis_Pb207_Pb206_age	pleis_Pb207_Pb206_age_err	pleis_Pb208_Th232_age	pleis_Pb208_Th232_age_err	discordance_Pb206U238_Pb207Pb206	discordance_Pb206U238_Pb207U235
Pleis 1	0.0539481	5.42899	0.437125	11.9846	0.0587896	11.0184	0.891934	0.018623	14.0642	368.26	39.4396	368.223	37.0302	368.882	122.301	372.951	52.0385	0.168484	-0.00999542
Pleis 2	0.052202	4.98214	0.420775	12.2963	0.0584793	11.8369	0.915457	0.0162549	11.8438	366.371	42.1583	356.605	36.9932	294.27	113.722	325.906	38.3264	-24.5015	-2.73856
Pleis 3	0.0540178	5.56921	0.42055	12.7223	0.0564794	12.0239	0.900215	0.0171568	14.4815	354.179	41.4381	356.444	38.2614	371.792	125.395	343.837	49.4319	4.73708	0.635344
Pleis 4	0.0534556	5.49853	0.390256	12.6691	0.0529189	11.9577	0.901884	0.0163496	10.4881	332.417	38.7424	334.556	36.1255	348.185	124.326	327.789	34.1304	4.52856	0.639313
Pleis 5	0.0530802	4.4353	0.368176	7.22138	0.0502551	5.75934	0.789201	0.0169334	6.59547	316.088	17.7655	318.301	19.7341	332.225	100.572	339.396	22.2101	4.85727	0.695163
Pleis 6	0.0535098	4.37566	0.362835	7.76278	0.049107	6.47565	0.826039	0.0170675	5.92527	309.037	19.5401	314.329	20.9882	350.474	98.8963	342.061	20.1075	11.8232	1.68385
Pleis 7	0.0532614	4.40131	0.367293	8.07014	0.0499329	7.45716	0.842176	0.0164539	7.46627	314.11	22.8623	317.645	22.0156	339.95	99.6635	329.864	24.4435	7.60116	1.11288
Pleis 8	0.0531491	4.26984	0.366526	8.78719	0.0499292	8.02298	0.874839	0.0163592	10.1388	314.087	24.5952	317.076	23.9358	335.167	96.7694	327.98	33.0118	6.2893	0.942539
Pleis 9	0.0532007	4.94772	0.371258	10.5003	0.0505241	10.7476	0.891811	0.0165165	10.3574	317.738	33.3215	320.585	28.8739	337.368	112.088	331.109	34.0435	5.81852	0.887994
Pleis 10	0.0527473	4.74832	0.371701	10.5946	0.0510222	11.3302	0.908341	0.0156679	9.7257	320.795	35.4576	320.914	29.1588	317.94	107.923	314.229	30.3474	-0.897762	0.0371404
Pleis 11	0.053098	4.92785	0.38215	11.6992	0.0521152	10.5552	0.906974	0.0175132	12.2248	327.495	33.7046	328.619	32.8561	332.986	111.726	350.917	42.5735	1.64904	0.34215
Pleis 12	0.0520021	5.44189	0.391353	10.0578	0.0545042	8.20008	0.841388	0.0161121	9.3657	342.116	27.3225	335.357	28.733	285.502	124.413	323.066	30.0392	-19.8295	-2.01539
Pleis 13	0.0521498	5.57958	0.394692	9.36676	0.0548231	6.76467	0.807768	0.015738	13.8655	344.065	22.6647	337.791	26.9216	291.982	127.412	315.624	43.4695	-17.8376	-1.85718
Pleis 14	0.0544023	5.05597	0.410512	9.86653	0.0546685	8.60246	0.858825	0.0168414	12.8382	343.12	28.7452	349.244	29.1651	387.74	113.517	337.568	43.0236	11.5077	1.75345
Pleis 15	0.0533958	5.33584	0.401493	8.87463	0.0544842	8.60126	0.813996	0.0163762	9.86648	341.993	28.6493	342.73	25.8203	345.652	120.702	328.319	32.1574	1.05847	0.215067
Pleis 16	0.0531124	4.12365	0.409874	8.39499	0.0559286	8.23919	0.877253	0.0176014	10.0142	350.818	28.1323	348.784	24.786	333.6	93.4826	352.668	35.0408	-5.16111	-0.582931
Pleis 17	0.0533587	4.57295	0.422896	6.98305	0.0574467	5.62554	0.757289	0.0171394	6.93287	360.079	19.7011	358.12	21.0765	344.082	103.474	343.49	23.6263	-4.64927	-0.546993
Pleis 18	0.0531911	4.58015	0.410885	6.57913	0.055998	5.45015	0.725255	0.0168682	8.14452	351.241	18.6311	349.513	19.4572	336.955	103.769	338.101	27.3261	-4.23984	-0.494646
Pleis 19	0.0528085	4.94477	0.416289	6.95128	0.0571493	5.55864	0.708702	0.0173151	9.91308	358.266	19.3715	353.394	20.7491	320.579	112.334	346.982	34.1319	-11.7557	-1.37862
Pleis 20	0.0545417	4.80336	0.4134	6.1766	0.0549517	4.96309	0.647698	0.016958	8.50134	344.851	16.6656	351.321	18.3456	393.484	107.736	339.885	28.6736	12.3597	1.84173
Pleis 21	0.0533903	4.75988	0.414762	6.05522	0.0563215	5.46784	0.66306	0.0173082	10.2007	353.216	18.7937	352.299	18.0269	345.419	107.678	346.844	35.1091	-2.25715	-0.260236
Pleis 22	0.0541542	5.49718	0.406812	5.75889	0.0544604	4.90722	0.478175	0.0178713	8.97506	341.848	16.3382	346.577	16.9109	377.469	123.648	358.03	31.8756	9.43684	1.36448
Pleis 23	0.0543864	5.69951	0.403048	6.668	0.0537223	5.6161	0.581048	0.0164561	16.5284	337.334	18.4579	343.857	19.4519	387.085	127.981	329.906	54.1583	12.8528	1.89689
Pleis 24	0.0531498	5.81419	0.4036	6.84312	0.0550415	5.14028	0.560702	0.0178556	16.382	345.399	17.2873	344.256	19.9824	335.197	131.769	357.718	58.1693	-3.04374	-0.332213
Pleis 25	0.0517459	5.03369	0.390138	6.62304	0.0546423	4.34411	0.649919	0.0167171	13.895	342.96	14.5092	334.47	18.8755	274.196	115.317	335.096	46.2306	-25.0786	-2.53834
Pleis 26	0.0539701	7.45005	0.405814	8.69596	0.0544876	4.53635	0.515806	0.019929	15.7049	342.014	15.1106	345.856	25.494	369.803	167.803	398.848	62.1203	7.51445	1.11085
Pleis 27	0.0531412	4.51836	0.393366	6.31094	0.0536321	4.19036	0.699023	0.0170077	14.5239	336.782	13.7501	336.826	18.0926	334.83	102.408	340.874	49.1526	-0.583058	0.0129335
Pleis 28	0.0536317	6.05726	0.389594	7.7031	0.0526223	4.83952	0.61788	0.0165845	6.98696	330.601	15.5962	334.073	21.9325	355.615	136.777	332.461	23.0521	7.03412	1.03928
Pleis 29	0.0822585	4.77596	0.625283	6.40087	0.0550569	4.51529	0.6669	0.0430808	7.57418	345.494	15.1894	493.154	25.0095	1251.68	93.4478	852.525	63.3281	72.3975	29.9419
Pleis 30	0.0529907	4.84913	0.384124	6.97568	0.0524965	6.07864	0.732217	0.0159995	8.67031	329.831	19.545	330.068	19.6593	328.4	110.032	320.826	27.6158	-0.435608	0.0719693
Pleis 31	0.053299	4.10174	0.376866	5.84868	0.0512013	5.39956	0.73682	0.0158905	9.06102	321.893	16.954	324.73	16.2562	341.548	92.8535	318.658	28.6675	5.7546	0.873608
Pleis 32	0.0539655	5.47333	0.381761	6.35832	0.0512218	5.43828	0.579059	0.0165078	9.94099	322.018	17.0821	328.333	17.8392	369.609	123.284	330.935	32.6567	12.8759	1.92332
Pleis 33	0.0527054	6.098	0.390899	7.29318	0.0536997	5.75078	0.585058	0.0167114	10.3236	337.196	18.893	335.026	20.815	316.134	138.644	334.983	34.3263	-6.66229	-0.647801
Pleis 34	0.053757	5.67467	0.378539	7.32244	0.0509849	5.54784	0.642417	0.0164653	10.0042	320.565	17.3495	325.962	20.4191	360.882	128.018	330.09	32.7812	11.1718	1.65575
Pleis 35	0.0512158	4.9138	0.371962	5.53365	0.0525876	4.24344	0.521313	0.0155178	11.7049	330.388	13.6667	321.106	15.2346	250.554	113.056	311.24	36.1836	-31.8634	-2.89064
Pleis 36	0.0528712	7.34406	0.381225	7.28497	0.0522155	3.81972	0.24663	0.0173222	17.1409	328.109	12.2193	327.939	20.4189	323.274	166.76	347.123	59.0782	-1.49576	-0.0517977
Pleis 37	0.0519603	6.80042	0.375897	7.37768	0.0523952	4.30396	0.420563	0.0163911	16.5959	329.21	13.8134	324.015	20.4688	283.665	155.524	328.616	54.1682	-16.0558	-1.60338
Pleis 38	0.0519699	7.06992	0.38076	7.83272	0.0530712	4.6072	0.451605	0.0180015	15.8146	333.349	14.9678	327.598	21.9353	284.086	161.675	360.614	56.6031	-17.3408	-1.75576
Pleis 39	0.0556233	8.95468	0.404675	9.52593	0.0527078	4.62634	0.362606	0.0147777	17.721	331.125	14.9322	345.033	27.8726	437.363	199.3	296.504	52.2273	24.2906	4.03105
Pleis 40	0.0537252	7.83806	0.396165	9.32185	0.0534304	3.98249	0.556539	0.017512	15.6456	335.548	13.0214	338.863	26.8642	359.547	176.865	350.893	54.4988	6.67484	0.978265
Pleis 41	0.0528827	8.28849	0.397467	9.88254	0.0544652	4.34094	0.557224	0.0166235	15.5532	341.878	14.4541	339.81	28.5478	323.767	188.188	333.237	51.4694	-5.59357	-0.608586
Pleis 42	0.057629	8.64545	0.436479	10.1927	0.0548865	4.11693	0.549248	0.0154042	14.7261	344.452	13.8087	367.767	31.4573	515.687	189.864	308.979	45.205	33.2052	6.33957
Pleis 43	0.0510012	10.4538	0.386055	12.3448	0.0548501	4.78283	0.558798	0.016303	22.323	344.23	16.0321	331.483	34.9263	240.882	240.946	326.862	72.5084	-42.904	-3.8453
Pleis 44	0.0534541	9.56153	0.403014	11.381	0.0546313	4.22714	0.581726	0.0183403	16.3488	342.893	14.1158	343.832	33.2064	348.123	216.195	367.341	59.6012	1.50234	0.273148
Pleis 45	0.0524185	9.84846	0.396433	11.9796	0.0548002	5.1267	0.592692	0.0188509	16.4432	343.925	17.1699	339.058	34.5453	303.71	224.417	377.471	61.586	-13.2414	-1.43539
Secondary reference material
Analysis_name	bias_corr_fc5z_Pb207_Pb206	bias_corr_fc5z_Pb207_Pb206_err	bias_corr_fc5z_Pb207_U235	bias_corr_fc5z_Pb207_U235_err	bias_corr_fc5z_Pb206_U238	bias_corr_fc5z_Pb206_U238_err	rho	bias_corr_fc5z_Pb208_Th232	bias_corr_fc5z_Pb208_Th232_err	fc5z_Pb206_U238_age,	fc5z_Pb206_U238_age_err	fc5z_Pb207_U235_age	fc5z_Pb207_U235_age_err	fc5z_Pb207_Pb206_age	fc5z_Pb207_Pb206_age_err	fc5z_Pb208_Th232_age	fc5z_Pb208_Th232_age_err	discordance_Pb206U238_Pb207Pb206	discordance_Pb206U238_Pb207U235
FC5Z 1	0.0770127	4.24612	2.05619	7.70206	0.193676	6.63319	0.834729	0.0571565	5.94276	1141.26	69.382	1134.36	52.6634	1121.52	84.6705	1123.45	65.0471	-1.76008	-0.608494
FC5Z 2	0.0768715	3.56242	1.81853	5.78501	0.171292	4.81549	0.789091	0.0568676	4.04909	1019.23	45.3981	1052.16	37.917	1117.86	71.0756	1117.93	44.0849	8.8231	3.12965
FC5Z 3	0.0761637	4.37987	1.84852	7.74824	0.175748	6.3646	0.824911	0.0552058	6.16516	1043.7	61.3307	1062.9	51.0981	1099.38	87.6253	1086.12	65.2991	5.06401	1.80647
FC5Z 4	0.0768559	4.00748	1.99302	6.36721	0.187906	5.50953	0.781584	0.0573198	5.49052	1110.02	56.1826	1113.15	43.0766	1117.45	79.9599	1126.57	60.2522	0.665264	0.280859
FC5Z 5	0.0747696	4.17264	1.98866	6.24977	0.192823	4.83279	0.745013	0.0591958	5.79056	1136.65	50.3626	1111.67	42.2502	1062.31	83.9438	1162.4	65.5169	-6.99758	-2.24729
FC5Z 6	0.0769425	4.26002	1.99058	5.59424	0.187542	4.24127	0.65614	0.0566708	8.57561	1108.04	43.1787	1112.32	37.8265	1119.7	84.9705	1114.16	93.175	1.04103	0.384348
FC5Z 7	0.0761155	3.85917	1.92509	5.51054	0.183244	3.84558	0.714006	0.0561255	8.65685	1084.67	38.3919	1089.84	36.8406	1098.11	77.2226	1103.73	93.2009	1.22376	0.473854
FC5Z 8	0.0751821	3.73196	1.86114	5.47991	0.179256	4.35833	0.73476	0.0537758	4.79227	1062.91	42.708	1067.39	36.2098	1073.37	74.9536	1058.71	49.491	0.974993	0.419901
FC5Z 9	0.0764653	4.21174	1.88365	5.67804	0.178372	4.16342	0.673336	0.0570762	5.95658	1058.08	40.6274	1075.35	37.6777	1107.28	84.1626	1121.92	65.1117	4.44352	1.60611
FC5Z 10	0.0752878	5.59193	1.86129	6.84778	0.17911	4.27597	0.578984	0.0569231	9.37397	1062.11	41.8721	1067.44	45.2605	1076.2	112.262	1118.99	102.301	1.30858	0.499451
FC5Z 11	0.0732492	6.20412	1.90424	7.80382	0.188366	3.94929	0.61658	0.0606402	9.45551	1112.52	40.3548	1082.57	52.0004	1020.85	125.622	1189.95	109.564	-8.97905	-2.76592
User-defined input parameters
pleis_Pb206_U238_known	0.0536372
pleis_Pb207_Pb206_known	0.053243
pleis_Pb207_U235_known	0.394138
pleis_Pb208_Th232_known	0.0168179
pleis_Pb206_U238_known_err	1
pleis_Pb207_Pb206_known_err	0.8
pleis_Pb207_U235_known_err	1.2
pleis_Pb208_Th232_known_err	1
fc5z_Pb206_U238_known	0.185154
fc5z_Pb207_Pb206_known	0.0762119
fc5z_Pb207_U235_known	1.94561
fc5z_Pb208_Th232_known	0.0557219
fc5z_Pb206_U238_known_err	0.75
fc5z_Pb207_Pb206_known_err	0.8
fc5z_Pb207_U235_known_err	1.25
fc5z_Pb208_Th232_known_err	1
reject_poly_order	4
reject_spline_breaks	5
outlier_cutoff_68	10
outlier_cutoff_76	10
outlier_cutoff_75	10
outlier_cutoff_82	15
replace_bad_rho	0.7
BL_xmin	0
BL_xmax	7
threshold_U238	5000
add_sec	5
int_time	14
filter_unc_cutoff	15
filter_transition_68_76	1000
filter_disc_transition	600
filter_disc_young	15
filter_disc_old	20
filter_disc_rev	10
poly_order	3

## Sheet: 1SMBT4
Filtered data																								Smith, T.M., Saylor, J.E., Lapen, T.J., Hatfield, K., and Sundell, K.E., 2022, Identifying sources of non-unique detrital age distributions through integrated provenance analysis: An example from the Paleozoic Central Colorado Trough: Geosphere, v. 18, https://doi.org/10.1130/GES02541.1
Analysis_name	bias_corr_samples_Pb207_Pb206	bias_corr_samples_Pb207_Pb206_err	bias_corr_samples_Pb207_U235	bias_corr_samples_Pb207_U235_err	bias_corr_samples_Pb206_U238	bias_corr_samples_Pb206_U238_err	rho	bias_corr_samples_Pb208_Th232	bias_corr_samples_Pb208_Th232_err	samples_Pb206_U238_age,	samples_Pb206_U238_age_err	samples_Pb207_U235_age	samples_Pb207_U235_age_err	samples_Pb207_Pb206_age	samples_Pb207_Pb206_age_err	samples_Pb208_Th232_age	samples_Pb208_Th232_age_err	discordance_Pb206U238_Pb207Pb206	discordance_Pb206U238_Pb207U235	best_age	best_age_err
1SMBT4-199	0.0586043	5.90462	0.627254	8.12436	0.0775561	5.68189	0.686982	0.0245389	8.1214	481.519	26.3627	494.384	31.8089	552.427	128.859	489.999	39.3546	12.8357	2.60218	481.519	26.3627
1SMBT4-67	0.0586971	3.72861	0.660789	5.76774	0.0815916	4.62068	0.763858	0.0242652	4.60679	505.616	22.4702	515.096	23.3056	555.878	81.3234	484.598	22.071	9.0419	1.8405	505.616	22.4702
1SMBT4-92	0.0585553	11.2948	0.659966	15.9197	0.08168	11.2754	0.704731	0.0269194	13.1625	506.143	54.8882	514.593	64.3529	550.6	246.568	536.905	69.8602	8.0743	1.64218	506.143	54.8882
1SMBT4-166	0.0660969	4.43388	0.746716	6.48834	0.0818442	3.71482	0.751756	0.0268417	7.18413	507.121	18.1168	566.317	28.1714	809.445	92.7622	535.378	37.993	37.3495	10.4528	507.121	18.1168
1SMBT4-107	0.0583159	5.82937	0.675555	7.5968	0.0839459	5.15739	0.642277	0.0267984	6.70825	519.632	25.7479	524.084	31.1099	541.649	127.451	534.525	35.4183	4.06472	0.849411	519.632	25.7479
1SMBT4-155	0.0589273	9.15781	0.694524	12.9544	0.0853855	9.40444	0.707526	0.0274701	10.7261	528.189	47.6935	535.515	53.9628	564.41	199.449	547.743	58.0459	6.41761	1.36806	528.189	47.6935
1SMBT4-72	0.0678988	7.79747	0.842048	10.5315	0.0898823	7.23612	0.672332	0.0308277	6.75689	554.841	38.4701	620.275	48.9205	865.468	161.708	613.686	40.8842	35.8912	10.5492	554.841	38.4701
1SMBT4-230	0.0592505	6.57043	0.74715	9.17498	0.0913984	6.30549	0.698056	0.0268765	7.8453	563.802	34.0406	566.57	39.8599	576.313	142.81	536.061	41.5455	2.17086	0.488391	563.802	34.0406
1SMBT4-243	0.0673286	13.0295	0.854929	19.408	0.0920272	14.371	0.741146	0.0305351	15.8831	567.515	78.0744	627.351	91.0701	847.955	270.949	607.946	95.3476	33.0725	9.53785	567.515	78.0744
1SMBT4-88	0.0772798	4.2639	1.88179	5.79857	0.176472	4.14096	0.678631	0.0548842	6.50876	1047.67	40.0422	1074.69	38.4652	1128.42	84.9382	1079.96	68.5632	7.15594	2.51454	1128.42	84.9382
1SMBT4-09	0.086738	14.411	2.89862	20.2415	0.242129	14.2723	0.70223	0.0523812	10.277	1397.76	179.392	1381.55	153.98	1354.68	277.909	1031.94	103.657	-3.17984	-1.17291	1354.68	277.909
1SMBT4-73	0.0876963	6.50242	2.42719	9.14866	0.200596	6.60807	0.70369	0.0667515	5.05707	1178.52	71.1763	1250.69	65.8812	1375.84	125.03	1306.08	64.0618	14.3418	5.77033	1375.84	125.03
1SMBT4-82	0.0879177	10.5169	3.12916	15.2508	0.257947	11.1553	0.724232	0.0721023	9.77873	1479.33	147.484	1439.89	117.878	1380.69	202.085	1407.2	133.365	-7.14469	-2.73937	1380.69	202.085
1SMBT4-21	0.0886674	4.32088	2.70863	6.38027	0.221354	4.89133	0.736397	0.054712	8.12431	1289.03	57.1481	1330.83	47.35	1396.98	82.8416	1076.66	85.3623	7.72805	3.14095	1396.98	82.8416
1SMBT4-48	0.0888919	4.36959	2.79739	6.57705	0.228068	4.81621	0.74756	0.0646647	6.40206	1324.36	57.6602	1354.84	49.2345	1401.83	83.7201	1266.5	78.7469	5.52624	2.24944	1401.83	83.7201
1SMBT4-06	0.0888942	4.12464	2.92437	5.34411	0.238353	3.70779	0.638273	0.0612053	9.58759	1378.13	46.0062	1388.24	40.4573	1401.88	79.0264	1200.71	112.077	1.69424	0.728123	1401.88	79.0264
1SMBT4-121	0.0892449	4.9635	3.04469	7.91173	0.247192	6.15276	0.778731	0.0703265	10.2543	1423.98	78.616	1418.9	60.5444	1409.42	95.0007	1373.7	136.643	-1.03295	-0.357922	1409.42	95.0007
1SMBT4-41	0.089465	5.78588	2.54033	9.14783	0.205777	7.08118	0.774571	0.0521892	21.5758	1206.28	77.9067	1283.67	66.7451	1414.13	110.67	1028.26	217.472	14.6982	6.02864	1414.13	110.67
1SMBT4-226	0.0895203	5.43082	2.927	8.17751	0.236982	6.11173	0.747628	0.0559141	5.53145	1370.99	75.484	1388.92	61.9657	1415.32	103.862	1099.68	59.2902	3.13192	1.29076	1415.32	103.862
1SMBT4-254	0.0914645	12.0057	3.30684	17.3755	0.261981	12.651	0.722912	0.0551388	12.913	1499.97	169.34	1482.67	136.275	1456.29	228.336	1084.84	136.854	-2.99921	-1.16699	1456.29	228.336
1SMBT4-07	0.0928523	10.0346	3.55458	15.5991	0.277369	12.0349	0.765651	0.0658942	10.7708	1578.1	168.501	1539.46	124.231	1484.88	190.117	1289.82	135.035	-6.2782	-2.51025	1484.88	190.117
1SMBT4-14	0.0934542	5.36983	3.38499	8.12509	0.262444	6.35888	0.751139	0.0788845	17.9837	1502.34	85.2215	1500.93	63.7701	1497.11	101.572	1534.67	267.536	-0.349176	-0.0938738	1497.11	101.572
1SMBT4-32	0.0944922	7.61168	3.34341	11.2523	0.256404	8.40848	0.736561	0.0325834	27.7267	1471.42	110.63	1491.25	88.1697	1517.97	143.582	648.082	177.619	3.06671	1.32994	1517.97	143.582
1SMBT4-127	0.0958475	5.94554	3.5018	10.0412	0.264712	7.93333	0.806012	0.0806484	16.4451	1513.9	107.052	1527.62	79.4706	1544.78	111.76	1567.69	249.598	1.99903	0.897897	1544.78	111.76
1SMBT4-60	0.0959931	8.59821	3.5114	12.2949	0.265116	8.75476	0.714802	0.0574654	10.9176	1515.96	118.281	1529.78	97.4663	1547.64	161.562	1129.36	120.274	2.04652	0.903414	1547.64	161.562
1SMBT4-169	0.0960068	6.38025	3.20513	10.4407	0.241857	8.05172	0.791828	0.0572179	8.27929	1396.35	101.095	1458.4	80.9741	1547.9	119.882	1124.63	90.7716	9.79119	4.25498	1547.9	119.882
1SMBT4-187	0.096183	10.8079	3.73108	17.153	0.281063	13.4009	0.776537	0.0835267	14.7528	1596.71	189.587	1578.06	138.202	1551.35	202.985	1621.45	231.183	-2.92399	-1.18177	1551.35	202.985
1SMBT4-85	0.0962083	5.41754	3.12006	7.11057	0.235031	4.78701	0.648179	0.0461848	9.37817	1360.81	58.7274	1437.65	54.7285	1551.84	101.741	912.582	83.8539	12.31	5.34463	1551.84	101.741
1SMBT4-217	0.0966003	4.79609	3.84307	7.09947	0.288329	5.06968	0.737685	0.0794227	18.4943	1633.17	73.1439	1601.82	57.2629	1559.48	89.9807	1544.75	276.934	-4.72566	-1.95748	1559.48	89.9807
1SMBT4-65	0.0974006	7.71762	3.84604	11.6609	0.286188	8.85445	0.749709	0.0847108	5.89945	1622.45	127.023	1602.44	94.2396	1574.93	144.502	1643.53	93.3367	-3.01705	-1.24884	1574.93	144.502
1SMBT4-182	0.0975997	5.5173	4.06481	9.0222	0.301749	7.09678	0.791239	0.069358	9.46646	1699.98	106.057	1647.27	73.6513	1578.76	103.253	1355.4	124.484	-7.67819	-3.19951	1578.76	103.253
1SMBT4-249	0.0978686	12.1904	3.73887	19.3652	0.276853	14.9573	0.777014	0.0404513	12.4184	1575.49	209.138	1579.73	156.362	1583.9	227.984	801.507	97.8228	0.531051	0.268397	1583.9	227.984
1SMBT4-49	0.0979643	2.50721	3.55798	4.10653	0.263215	2.98011	0.795011	0.0385257	6.2477	1506.27	40.0303	1540.21	32.56	1585.73	46.8786	764.065	46.8999	5.01114	2.20396	1585.73	46.8786
1SMBT4-213	0.098389	5.67672	3.042	8.28186	0.22407	5.90652	0.728285	0.0193963	7.15333	1303.35	69.7019	1418.22	63.37	1593.81	106.03	388.289	27.5292	18.2246	8.1001	1593.81	106.03
1SMBT4-19	0.0986462	11.0487	3.91437	17.2377	0.287524	13.3537	0.767609	0.0798786	7.32302	1629.15	192.294	1616.65	140.299	1598.69	206.238	1553.28	109.784	-1.90527	-0.772647	1598.69	206.238
1SMBT4-27	0.0987619	13.662	3.69493	19.9694	0.271102	14.6733	0.729365	0.0810756	14.1809	1546.39	201.808	1570.27	160.911	1600.87	254.947	1575.67	216.109	3.40314	1.52071	1600.87	254.947
1SMBT4-79	0.0988103	3.3762	3.02155	4.74154	0.221623	3.86371	0.709929	0.0415806	12.6495	1290.45	45.1864	1413.08	36.1884	1601.79	62.9962	823.433	102.325	19.4372	8.67813	1601.79	62.9962
1SMBT4-181	0.0990157	4.39398	3.86424	6.67116	0.282756	4.96005	0.752501	0.0472785	9.34953	1605.23	70.4837	1606.25	53.8626	1605.66	81.9459	933.702	85.4916	0.0270889	0.0634813	1605.66	81.9459
1SMBT4-112	0.099375	4.75541	3.7007	8.03314	0.269847	6.48759	0.805958	0.087621	6.13177	1540.03	88.8782	1571.52	64.3008	1612.41	88.6098	1697.68	100.094	4.4893	2.00407	1612.41	88.6098
1SMBT4-109	0.0995993	8.93199	3.64688	15.5556	0.265329	12.8478	0.818749	0.0842481	10.8692	1517.05	173.713	1559.83	124.58	1616.61	166.344	1634.9	171.429	6.15866	2.74248	1616.61	166.344
1SMBT4-123	0.0998104	5.56986	3.16893	8.641	0.230042	6.59855	0.764533	0.0414692	8.00403	1334.72	79.5566	1449.62	66.7894	1620.55	103.678	821.271	64.52	17.638	7.92624	1620.55	103.678
1SMBT4-139	0.0998265	3.49269	4.01742	5.63193	0.291565	4.62048	0.785264	0.0845864	5.68496	1649.35	67.242	1637.73	45.8194	1620.85	65.0106	1641.21	89.8137	-1.75793	-0.709418	1620.85	65.0106
1SMBT4-36	0.100079	6.02089	3.31376	9.02919	0.239949	6.77655	0.745233	0.052421	11.0773	1386.43	84.541	1484.3	70.541	1625.56	112.001	1032.71	111.831	14.7104	6.59318	1625.56	112.001
1SMBT4-10	0.100313	12.3124	3.34574	16.475	0.241659	11.0222	0.664459	0.0318042	9.11835	1395.32	138.31	1491.8	129.488	1629.89	228.91	632.823	56.889	14.392	6.4674	1629.89	228.91
1SMBT4-258	0.100349	8.49209	3.48203	11.5819	0.25142	8.01886	0.680098	0.0181841	28.5685	1445.79	103.864	1523.15	91.6098	1630.56	157.87	364.239	103.39	11.3317	5.07891	1630.56	157.87
1SMBT4-11	0.100504	6.6372	4.02229	9.34067	0.289975	6.69731	0.703752	0.0815594	12.5617	1641.41	97.0579	1638.71	76.1013	1633.43	123.342	1584.72	192.376	-0.488542	-0.164367	1633.43	123.342
1SMBT4-38	0.100531	3.06007	3.33151	4.58014	0.240154	3.50143	0.744328	0.034425	12.2587	1387.5	43.7104	1488.47	35.7841	1633.92	56.8632	684.098	82.6269	15.0818	6.78333	1633.92	56.8632
1SMBT4-197	0.100604	4.63226	3.78092	6.42053	0.27232	4.57258	0.692712	0.0724535	7.86519	1552.57	63.0924	1588.7	51.6013	1635.27	86.0634	1413.83	107.686	5.05755	2.27443	1635.27	86.0634
1SMBT4-241	0.100672	3.37008	4.29465	5.09561	0.309181	3.77214	0.750125	0.0883601	5.86285	1736.68	57.429	1692.34	41.9918	1636.54	62.6031	1711.41	96.4368	-6.11916	-2.62019	1636.54	62.6031
1SMBT4-198	0.100847	5.16828	3.8354	7.66812	0.275581	5.76473	0.738848	0.0790863	4.43806	1569.07	80.2898	1600.21	61.8349	1639.75	95.9676	1538.45	65.8505	4.31051	1.94599	1639.75	95.9676
1SMBT4-173	0.100996	8.16511	3.7438	11.8489	0.26856	8.38198	0.724877	0.0795071	15.4035	1533.49	114.404	1580.79	95.2284	1642.49	151.52	1546.33	230.616	6.63671	2.99223	1642.49	151.52
1SMBT4-08	0.101118	6.21739	4.0118	8.50034	0.287459	5.98337	0.682262	0.0749099	10.4689	1628.82	86.1255	1636.59	69.1964	1644.73	115.343	1460.07	148.003	0.967624	0.474848	1644.73	115.343
1SMBT4-56	0.101131	6.0304	3.82427	9.08056	0.274068	6.59958	0.747943	0.0802893	6.13744	1561.42	91.5227	1597.87	73.2169	1644.97	111.871	1560.97	92.4085	5.07916	2.28127	1644.97	111.871
1SMBT4-236	0.101242	8.54948	4.07764	12.4338	0.291928	9.00705	0.726092	0.0802281	7.67089	1651.16	131.22	1649.84	101.726	1647.01	158.562	1559.82	115.481	-0.25169	-0.0798265	1647.01	158.562
1SMBT4-20	0.101277	10.4601	4.01471	15.1367	0.287238	11.0269	0.722838	0.0667744	11.5546	1627.71	158.651	1637.18	123.654	1647.64	193.981	1306.51	146.717	1.20963	0.578314	1647.64	193.981
1SMBT4-143	0.101278	4.5754	3.41543	9.38061	0.244319	8.27643	0.873032	0.0338846	19.6112	1409.11	104.767	1507.95	73.807	1647.67	84.85	673.536	130.331	14.4786	6.55459	1647.67	84.85
1SMBT4-91	0.101299	5.56274	3.82844	7.43038	0.273893	5.05339	0.663182	0.0477794	10.1801	1560.53	70.0431	1598.74	59.8906	1648.04	103.155	943.367	94.0474	5.31019	2.39024	1648.04	103.155
1SMBT4-76	0.101332	3.63146	3.8864	5.62134	0.27797	4.71771	0.766761	0.0710968	7.55059	1581.13	66.1519	1610.86	45.4274	1648.65	67.3364	1388.24	101.556	4.09539	1.8456	1648.65	67.3364
1SMBT4-179	0.101333	8.8408	3.35066	12.1908	0.239565	8.32435	0.688557	0.03465	5.72292	1384.43	103.719	1492.95	95.613	1648.68	163.93	688.494	38.7756	16.0275	7.26831	1648.68	163.93
1SMBT4-24	0.101472	8.24038	4.00333	11.7696	0.285879	8.51503	0.714064	0.080435	10.9963	1620.9	122.05	1634.87	95.905	1651.22	152.748	1563.69	166.147	1.83592	0.854363	1651.22	152.748
1SMBT4-99	0.101483	4.55386	4.11757	6.48629	0.29403	4.58879	0.712118	0.082586	6.70275	1661.64	67.217	1657.8	53.0394	1651.42	84.4104	1603.89	103.615	-0.618375	-0.231676	1651.42	84.4104
1SMBT4-50	0.101517	3.50787	3.78532	5.16863	0.270233	3.56555	0.735871	0.0559977	6.27248	1541.98	48.8999	1589.64	41.5374	1652.05	65.0167	1101.28	67.3417	6.66227	2.99768	1652.05	65.0167
1SMBT4-228	0.101518	4.43028	3.98421	6.67953	0.284458	4.99642	0.748387	0.0879627	6.85867	1613.77	71.3334	1630.98	54.2669	1652.05	82.1131	1704.03	112.395	2.31705	1.05516	1652.05	82.1131
1SMBT4-133	0.101601	8.90473	4.03512	14.3175	0.287744	11.2547	0.783063	0.0728593	11.3992	1630.25	162.151	1641.3	117.02	1653.58	165.013	1421.47	157.079	1.41098	0.673682	1653.58	165.013
1SMBT4-12	0.101606	5.6446	4.23981	7.98033	0.302343	5.81943	0.707241	0.0782158	16.1031	1702.92	87.0963	1681.76	65.6578	1653.66	104.599	1522.14	237.499	-2.97889	-1.25786	1653.66	104.599
1SMBT4-146	0.101612	7.69699	3.31306	11.384	0.236216	8.65371	0.737146	0.0581064	9.63546	1366.99	106.604	1484.13	89.018	1653.77	142.629	1141.6	107.234	17.3407	7.89281	1653.77	142.629
1SMBT4-132	0.101658	6.21937	3.76439	9.66306	0.268289	7.46106	0.765373	0.0699446	5.92944	1532.11	101.751	1585.19	77.6744	1654.62	115.236	1366.49	78.499	7.40388	3.34813	1654.62	115.236
1SMBT4-137	0.101703	11.3424	3.97889	16.3794	0.283443	11.8939	0.721455	0.0843004	14.0445	1608.68	169.369	1629.9	133.677	1655.43	210.136	1635.88	221.913	2.82407	1.30186	1655.43	210.136
1SMBT4-45	0.101767	7.69686	3.73147	10.4994	0.26573	7.07304	0.68018	0.042219	7.44141	1519.09	95.7318	1578.14	84.2703	1656.59	142.576	835.817	61.0202	8.29993	3.74181	1656.59	142.576
1SMBT4-114	0.101769	7.25143	3.85156	11.0912	0.274239	8.4026	0.756669	0.0805628	5.03289	1562.28	116.589	1603.6	89.6379	1656.63	134.324	1566.08	75.9857	5.69523	2.57636	1656.63	134.324
1SMBT4-256	0.101786	4.07695	4.42261	6.08069	0.314836	4.75727	0.742977	0.0793541	3.35401	1764.46	73.4359	1716.58	50.3976	1656.94	75.5176	1543.46	49.9023	-6.48896	-2.78918	1656.94	75.5176
1SMBT4-75	0.101816	3.00804	4.05596	4.72474	0.28872	4.1376	0.777393	0.056828	7.23373	1635.13	59.7583	1645.5	38.504	1657.48	55.7143	1117.17	78.7736	1.34848	0.629901	1657.48	55.7143
1SMBT4-140	0.101834	9.66203	4.17311	14.0842	0.296894	10.3173	0.727598	0.0850289	8.36296	1675.89	152.286	1668.76	115.864	1657.81	178.951	1649.45	132.901	-1.09072	-0.427476	1657.81	178.951
1SMBT4-128	0.10193	6.93363	3.48282	11.6708	0.247564	9.25165	0.804476	0.0361186	11.7658	1425.9	118.362	1523.33	92.3217	1659.57	128.389	717.163	83.0711	14.0797	6.39564	1659.57	128.389
1SMBT4-219	0.101954	8.6903	4.01058	12.7575	0.285098	9.24844	0.73214	0.0770411	12.1802	1616.99	132.284	1636.34	104.047	1660	160.909	1500.1	176.872	2.59133	1.18286	1660	160.909
1SMBT4-206	0.101958	5.36019	3.70259	7.94373	0.263163	5.82897	0.73804	0.0809263	6.35242	1506	78.2883	1571.93	63.5902	1660.08	99.2478	1572.88	96.3567	9.281	4.19386	1660.08	99.2478
1SMBT4-218	0.102024	13.091	4.38912	18.5578	0.311793	13.0889	0.708801	0.0819448	4.94349	1749.53	200.615	1710.29	154.652	1661.26	242.352	1591.92	75.819	-5.31302	-2.29389	1661.26	242.352
1SMBT4-31	0.10204	4.85284	3.93601	6.43232	0.27952	4.45543	0.657313	0.0762689	10.6323	1588.95	62.7462	1621.12	52.1266	1661.56	89.837	1485.6	152.865	4.37054	1.98454	1661.56	89.837
1SMBT4-135	0.102264	2.82602	3.99838	4.60218	0.283271	3.87591	0.790921	0.0795374	3.75189	1607.82	55.1553	1633.87	37.3977	1665.62	52.2893	1546.89	55.9498	3.47024	1.59444	1665.62	52.2893
1SMBT4-259	0.102307	4.04243	3.79774	5.75445	0.268963	4.36472	0.713139	0.0721744	4.97272	1535.53	59.639	1592.27	46.2832	1666.39	74.7889	1408.56	67.7726	7.85283	3.56302	1666.39	74.7889
1SMBT4-239	0.102316	4.47266	3.85776	7.00845	0.27329	5.3605	0.769903	0.0530629	7.0118	1557.48	74.1717	1604.89	56.5718	1666.55	82.7469	1045.03	71.54	6.54489	2.95438	1666.55	82.7469
1SMBT4-111	0.102351	3.63971	3.96131	6.34983	0.280452	5.21961	0.819422	0.0832195	5.21098	1593.64	73.7006	1626.31	51.5237	1667.19	67.3313	1615.72	81.0799	4.41153	2.00868	1667.19	67.3313
1SMBT4-161	0.102363	3.58502	3.77685	5.88968	0.2673	4.29006	0.796304	0.0673363	6.9996	1527.08	58.3328	1587.84	47.3178	1667.4	66.318	1317.15	89.4532	8.41542	3.82622	1667.4	66.318
1SMBT4-153	0.102441	8.98975	3.26754	13.1433	0.231079	9.8217	0.729711	0.0614138	11.516	1340.15	118.858	1473.36	102.53	1668.82	166.268	1204.69	135.129	19.6944	9.04093	1668.82	166.268
1SMBT4-152	0.1025	9.22314	3.43163	15.6235	0.242544	12.7892	0.807236	0.0423277	13.7302	1399.91	160.965	1511.67	123.446	1669.88	170.562	837.926	113.012	16.1671	7.39306	1669.88	170.562
1SMBT4-61	0.102566	5.5504	4.0754	8.02807	0.28798	5.74923	0.722525	0.0829315	7.41312	1631.43	82.8714	1649.39	65.5456	1671.08	102.627	1610.34	115.072	2.37278	1.08938	1671.08	102.627
1SMBT4-145	0.102568	3.75643	3.9163	5.93639	0.276624	5.06613	0.777995	0.0687677	10.9332	1574.34	70.7683	1617.05	48.0523	1671.1	69.4564	1344.24	142.691	5.79014	2.64164	1671.1	69.4564
1SMBT4-189	0.102569	13.5793	4.25878	19.6207	0.300843	14.2387	0.721819	0.0828172	13.4227	1695.49	212.354	1685.43	162.72	1671.13	251.081	1608.21	208.572	-1.45773	-0.596523	1671.13	251.081
1SMBT4-172	0.102575	8.75399	3.46441	12.2059	0.24469	8.29945	0.697085	0.0514256	13.116	1411.03	105.187	1519.15	96.4648	1671.24	161.858	1013.58	130.081	15.5695	7.117	1671.24	161.858
1SMBT4-46	0.102578	7.53952	4.26479	10.572	0.301309	7.34532	0.701027	0.0745854	10.9241	1697.8	109.649	1686.59	87.1701	1671.28	139.402	1453.96	153.838	-1.58641	-0.664316	1671.28	139.402
1SMBT4-196	0.102666	7.62704	4.12236	10.9008	0.290945	7.86119	0.714489	0.0793487	6.8979	1646.25	114.223	1658.74	89.3061	1672.88	140.992	1543.36	102.757	1.59193	0.753351	1672.88	140.992
1SMBT4-63	0.102697	4.1543	4.41421	6.46135	0.311525	4.88892	0.765969	0.0894074	5.72698	1748.21	74.863	1715.01	53.5394	1673.43	76.7904	1730.85	95.2238	-4.46841	-1.93566	1673.43	76.7904
1SMBT4-203	0.102708	3.0693	4.03077	4.55967	0.284392	3.49004	0.739953	0.0798858	5.20942	1613.45	49.8169	1640.43	37.1116	1673.62	56.7332	1553.42	78.0429	3.59538	1.64468	1673.62	56.7332
1SMBT4-90	0.10273	4.83012	4.06483	7.31261	0.286755	5.60487	0.750969	0.0801769	7.77735	1625.29	80.5232	1647.28	59.6594	1674.02	89.2759	1558.86	117.019	2.9111	1.33466	1674.02	89.2759
1SMBT4-77	0.102764	3.68102	4.12761	5.07814	0.291106	4.01029	0.695317	0.0875846	5.52429	1647.06	58.2901	1659.79	41.5298	1674.63	68.0318	1697	90.1204	1.64671	0.766981	1674.63	68.0318
1SMBT4-89	0.102865	6.23504	4.18956	9.33259	0.295168	7.03504	0.74414	0.0836335	5.66436	1667.3	103.363	1671.98	76.6467	1676.45	115.208	1623.44	88.5551	0.545598	0.279772	1676.45	115.208
1SMBT4-260	0.102893	4.62163	4.34031	6.77258	0.305634	5.17559	0.731699	0.0898278	5.3534	1719.19	78.1052	1701.05	55.9471	1676.94	85.391	1738.65	89.3835	-2.51912	-1.066	1676.94	85.391
1SMBT4-101	0.102893	5.54345	3.85361	7.91045	0.271406	5.79741	0.713641	0.0704961	5.88788	1547.94	79.7829	1604.02	63.8566	1676.95	102.423	1376.9	78.5229	7.69354	3.49668	1676.95	102.423
1SMBT4-207	0.102919	11.6634	4.07501	17.6898	0.286931	13.2853	0.751856	0.0876548	9.04841	1626.17	191.003	1649.32	145.208	1677.42	215.484	1698.31	147.931	3.05524	1.40313	1677.42	215.484
1SMBT4-221	0.102954	3.20221	4.0082	5.4868	0.282168	4.26058	0.812838	0.0827703	4.02384	1602.27	60.4452	1635.86	44.6166	1678.04	59.1572	1607.33	62.2675	4.51528	2.05328	1678.04	59.1572
1SMBT4-69	0.103089	7.50071	4.14461	11.2077	0.291386	8.44624	0.743117	0.0847001	9.39641	1648.45	122.87	1663.15	91.9313	1680.47	138.525	1643.33	148.85	1.90539	0.883388	1680.47	138.525
1SMBT4-02	0.10314	5.55061	4.14889	7.97347	0.291448	5.91335	0.71829	0.073373	9.91712	1648.76	86.0323	1663.99	65.3272	1681.39	102.498	1431.15	137.487	1.94055	0.915241	1681.39	102.498
1SMBT4-17	0.103196	11.6465	3.86325	16.7874	0.271254	12.224	0.720242	0.0399298	22.0198	1547.16	168.18	1606.04	136.217	1682.39	215.039	791.373	171.618	8.03778	3.6659	1682.39	215.039
1SMBT4-192	0.103326	3.42394	4.02227	4.9183	0.282062	3.68911	0.718575	0.0598677	4.8407	1601.74	52.322	1638.71	40.0167	1684.71	63.2004	1175.22	55.3424	4.92503	2.25613	1684.71	63.2004
1SMBT4-134	0.103347	10.3245	3.55644	15.6534	0.249324	11.8432	0.751659	0.0347088	7.04454	1434.99	152.391	1539.87	124.682	1685.09	190.565	689.642	47.8191	14.842	6.81116	1685.09	190.565
1SMBT4-227	0.103376	6.14866	3.85102	9.39105	0.270006	7.09656	0.755857	0.0709936	9.29692	1540.83	97.2674	1603.48	75.8391	1685.6	113.482	1386.29	124.947	8.5882	3.90702	1685.6	113.482
1SMBT4-253	0.103416	5.76124	4.18815	7.9847	0.293463	5.28017	0.693109	0.0549689	5.46435	1658.81	77.2301	1671.7	65.5391	1686.31	106.322	1081.58	57.6301	1.63067	0.771246	1686.31	106.322
1SMBT4-157	0.103433	3.17356	3.82033	6.35031	0.26758	5.89474	0.868247	0.0748175	6.19476	1528.51	80.2201	1597.04	51.1465	1686.62	58.5648	1458.33	87.3465	9.37478	4.29122	1686.62	58.5648
1SMBT4-81	0.103485	5.11897	4.32961	7.44845	0.303216	5.63325	0.727009	0.0715335	6.98046	1707.23	84.4962	1699.02	61.5149	1687.55	94.4543	1396.48	94.4096	-1.16645	-0.483567	1687.55	94.4543
1SMBT4-39	0.103509	4.67801	3.62012	9.26371	0.253452	8.0361	0.863141	0.0538819	17.7249	1456.26	104.759	1553.96	73.8327	1687.97	86.3132	1060.75	184.003	13.7272	6.28762	1687.97	86.3132
1SMBT4-37	0.103691	9.29311	3.67454	12.9919	0.256809	9.11444	0.698821	0.0284642	10.8128	1473.49	120.071	1565.85	104.06	1691.2	171.396	567.29	60.5778	12.8731	5.89836	1691.2	171.396
1SMBT4-174	0.103748	7.23855	4.08093	11.1041	0.284978	8.35136	0.758349	0.0375155	11.6676	1616.38	119.41	1650.5	90.8001	1692.23	133.486	744.395	85.4538	4.48203	2.06691	1692.23	133.486
1SMBT4-235	0.103764	3.51665	4.09245	5.905	0.285867	4.70355	0.803356	0.0761862	5.1484	1620.84	67.4106	1652.8	48.2206	1692.51	64.8482	1484.05	73.8019	4.23453	1.93339	1692.51	64.8482
1SMBT4-222	0.103791	9.80543	4.45729	14.4992	0.311254	10.6011	0.736672	0.0860836	6.51813	1746.88	162.251	1723.06	120.812	1692.98	180.805	1669.09	104.693	-3.18336	-1.3824	1692.98	180.805
1SMBT4-149	0.103834	7.80707	3.90855	12.0692	0.272706	9.44727	0.762869	0.0588362	13.404	1554.52	130.512	1615.45	97.8844	1693.76	143.943	1155.54	151.108	8.2207	3.77189	1693.76	143.943
1SMBT4-30	0.103866	5.30001	4.20321	7.83851	0.293246	5.94796	0.737084	0.080213	7.12488	1657.73	86.9487	1674.65	64.3805	1694.32	97.712	1559.54	107.221	2.15967	1.01031	1694.32	97.712
1SMBT4-106	0.103897	6.38774	4.02951	9.63399	0.281044	7.40808	0.748852	0.0753011	9.84344	1596.62	104.779	1640.17	78.5285	1694.88	117.757	1467.42	139.809	5.79749	2.65527	1694.88	117.757
1SMBT4-01	0.103898	4.93618	3.72902	7.09942	0.260044	5.31382	0.719318	0.0522172	10.19	1490.07	70.6974	1577.62	56.9024	1694.89	90.9979	1028.79	102.47	12.0847	5.54973	1694.89	90.9979
1SMBT4-165	0.103939	7.44165	3.89634	10.8293	0.271576	7.29769	0.728543	0.0708627	10.4176	1548.8	100.482	1612.92	87.7191	1695.62	137.173	1383.82	139.82	8.65889	3.9759	1695.62	137.173
1SMBT4-162	0.103951	3.28697	3.8056	6.21715	0.26522	4.94139	0.850647	0.0713884	5.81114	1516.49	66.7765	1593.93	50.032	1695.83	60.5878	1393.74	78.4148	10.5751	4.85818	1695.83	60.5878
1SMBT4-138	0.103956	3.16531	4.09013	5.33207	0.285052	4.49899	0.805636	0.0771443	4.38224	1616.76	64.3355	1652.34	43.5312	1695.92	58.3446	1502.04	63.5364	4.6678	2.15331	1695.92	58.3446
1SMBT4-225	0.103999	5.56504	3.76586	7.28497	0.26245	4.69857	0.645325	0.0605928	7.48249	1502.36	62.9694	1585.5	58.5141	1696.69	102.568	1189.04	86.5889	11.453	5.24342	1696.69	102.568
1SMBT4-102	0.104003	11.039	3.59324	15.1924	0.250367	10.5222	0.687074	0.0706853	10.3912	1440.37	135.84	1548.04	121.25	1696.75	203.454	1380.47	139.136	15.1103	6.95539	1696.75	203.454
1SMBT4-220	0.104011	3.65114	3.36565	5.74126	0.234522	4.23473	0.772522	0.0553826	6.09918	1358.16	51.8607	1496.44	44.9718	1696.9	67.2914	1089.51	64.7954	19.9624	9.24074	1696.9	67.2914
1SMBT4-188	0.104079	3.24249	4.43122	4.41096	0.308482	3.33332	0.681957	0.0832049	3.57944	1733.23	50.6602	1718.19	36.5575	1698.09	59.751	1615.44	55.6501	-2.06955	-0.875327	1698.09	59.751
1SMBT4-04	0.104134	9.86129	4.01245	14.218	0.279175	10.3493	0.720421	0.0679109	14.0473	1587.21	145.629	1636.72	116.068	1699.07	181.697	1328.03	181.368	6.58377	3.02521	1699.07	181.697
1SMBT4-232	0.104153	3.60309	3.57507	5.64571	0.248794	4.32771	0.769878	0.0375576	6.89888	1432.25	55.5822	1544.01	44.8247	1699.41	66.3849	745.215	50.5384	15.7204	7.23837	1699.41	66.3849
1SMBT4-245	0.104174	10.4264	4.73351	15.0894	0.329309	10.7841	0.722926	0.0850065	9.86725	1835.03	172.26	1773.19	127.153	1699.77	192.092	1649.03	156.861	-7.95757	-3.48751	1699.77	192.092
1SMBT4-25	0.104185	3.05126	4.24366	3.96283	0.295151	3.09381	0.651109	0.0805076	8.09485	1667.22	45.4509	1682.51	32.5755	1699.98	56.2138	1565.05	122.277	1.9272	0.908843	1699.98	56.2138
1SMBT4-113	0.104208	7.07721	3.78111	10.6595	0.262921	7.98178	0.74779	0.0355478	6.85859	1504.77	107.129	1588.74	85.8001	1700.39	130.378	706.025	47.6435	11.5045	5.2856	1700.39	130.378
1SMBT4-244	0.104308	14.9359	4.58385	22.1988	0.31849	16.3408	0.739811	0.0516156	6.27867	1782.35	254.587	1746.33	187.126	1702.14	275.092	1017.23	62.3843	-4.7126	-2.06249	1702.14	275.092
1SMBT4-191	0.104324	8.12185	4.26336	11.6838	0.296107	8.46703	0.718902	0.0874571	13.7532	1671.98	124.713	1686.32	96.3841	1702.42	149.584	1694.63	224.809	1.78843	0.850356	1702.42	149.584
1SMBT4-186	0.104367	3.03099	3.63108	4.07528	0.252079	3.09666	0.673956	0.0393583	5.22187	1449.19	40.1904	1556.37	32.4556	1703.18	55.8181	780.263	40.0075	14.9127	6.88641	1703.18	55.8181
1SMBT4-170	0.104434	4.26011	4.15658	7.3692	0.288344	5.71712	0.817007	0.0765589	5.63368	1633.25	82.4895	1665.51	60.386	1704.37	78.4416	1491.05	81.1401	4.17282	1.93688	1704.37	78.4416
1SMBT4-212	0.104451	4.00863	4.13158	5.80238	0.286664	4.01515	0.723683	0.0796293	5.69122	1624.84	57.6687	1660.57	47.4698	1704.67	73.8084	1548.62	85.0219	4.68287	2.1518	1704.67	73.8084
1SMBT4-204	0.104719	5.08699	4.26519	7.65613	0.295154	5.68723	0.747361	0.0841968	6.04843	1667.23	83.5547	1686.67	63.0553	1709.38	93.6086	1633.94	95.1626	2.46564	1.15225	1709.38	93.6086
1SMBT4-96	0.104745	4.59781	4.1887	6.62963	0.289799	4.74709	0.720447	0.0822011	7.437	1640.53	68.7602	1671.81	54.3945	1709.84	84.6021	1596.71	114.501	4.05385	1.87132	1709.84	84.6021
1SMBT4-94	0.104807	6.55902	4.23916	9.44703	0.293121	6.77852	0.719695	0.0734447	5.92615	1657.11	99.0593	1681.64	77.7663	1710.92	120.673	1432.5	82.1202	3.14538	1.45865	1710.92	120.673
1SMBT4-104	0.104925	5.68765	4.04149	8.5005	0.279124	6.45551	0.74335	0.082235	8.602	1586.95	90.8159	1642.59	69.2996	1712.99	104.615	1597.34	132.548	7.35816	3.38733	1712.99	104.615
1SMBT4-131	0.105037	11.8749	4.42521	16.7275	0.305243	11.8225	0.704306	0.0851666	11.7197	1717.26	178.275	1717.07	139.411	1714.96	218.365	1652.02	186.77	-0.134096	-0.0108211	1714.96	218.365
1SMBT4-84	0.1052	4.35914	4.30065	6.49211	0.296274	4.98501	0.741516	0.0829195	8.43661	1672.8	73.4512	1693.49	53.5331	1717.82	80.1309	1610.12	130.993	2.62054	1.22131	1717.82	80.1309
1SMBT4-251	0.105221	3.47889	4.82811	5.63303	0.33251	4.11643	0.788627	0.0874079	5.2046	1850.53	66.2199	1789.81	47.4173	1718.18	63.947	1693.72	84.7364	-7.7031	-3.39288	1718.18	63.947
1SMBT4-159	0.105224	5.83719	3.4696	8.66197	0.238879	6.74166	0.739835	0.0280394	8.54731	1380.87	83.8028	1520.33	68.3775	1718.22	107.295	558.938	47.1747	19.6341	9.17334	1718.22	107.295
1SMBT4-116	0.105298	9.73288	3.67522	13.5953	0.252905	9.49977	0.698202	0.0211385	16.9644	1453.44	123.63	1566	108.933	1719.53	178.874	422.802	71.1059	15.4747	7.18781	1719.53	178.874
1SMBT4-177	0.105419	5.45344	3.48747	7.79359	0.23968	5.46259	0.714533	0.039255	4.92078	1385.03	68.0855	1524.38	61.5755	1721.63	100.199	778.254	37.6032	19.5512	9.14156	1721.63	100.199
1SMBT4-125	0.105471	3.41932	4.0995	6.23625	0.281622	4.96591	0.837287	0.0794832	4.8418	1599.52	70.3462	1654.2	50.9473	1722.54	62.8182	1545.88	72.1865	7.14139	3.30553	1722.54	62.8182
1SMBT4-130	0.10556	4.11568	4.01007	7.08649	0.27524	5.85258	0.814146	0.0381861	4.87998	1567.35	81.4345	1636.24	57.6548	1724.08	75.5969	757.454	36.3122	9.09106	4.21049	1724.08	75.5969
1SMBT4-176	0.105666	3.67987	3.8366	5.90001	0.263055	4.48425	0.781967	0.0476855	10.5492	1505.46	60.2068	1600.46	47.5561	1725.93	67.5763	941.555	97.2825	12.7745	5.93601	1725.93	67.5763
1SMBT4-185	0.105861	5.01863	4.75577	6.97398	0.325496	5.06143	0.695046	0.0922998	5.56482	1816.51	80.1273	1777.13	58.5746	1729.32	92.1224	1784.44	95.268	-5.04186	-2.21626	1729.32	92.1224
1SMBT4-156	0.105886	5.83727	4.24418	8.80317	0.29038	6.92207	0.749449	0.0798602	8.64819	1643.43	100.424	1682.61	72.4639	1729.76	107.144	1552.94	129.687	4.99073	2.32862	1729.76	107.144
1SMBT4-86	0.105925	4.21582	4.49968	6.03798	0.307862	4.51542	0.716569	0.0896521	6.53637	1730.18	68.5214	1730.91	50.2018	1730.43	77.3754	1735.39	108.992	0.0143924	0.0425299	1730.43	77.3754
1SMBT4-44	0.10601	9.87976	3.82598	16.2655	0.261554	12.8837	0.794396	0.0680955	21.051	1497.79	172.233	1598.23	131.668	1731.9	181.296	1331.52	273.103	13.5174	6.28441	1731.9	181.296
1SMBT4-117	0.106075	5.87141	3.63347	8.68144	0.248199	6.40601	0.736612	0.0363411	6.91804	1429.18	82.1194	1556.89	69.2324	1733.03	107.727	721.502	49.093	17.5327	8.20302	1733.03	107.727
1SMBT4-240	0.106077	5.04671	4.6291	7.12908	0.316304	4.99757	0.706327	0.0772218	5.35483	1771.65	77.4188	1754.53	59.5963	1733.06	92.5951	1503.49	77.7374	-2.22702	-0.97599	1733.06	92.5951
1SMBT4-190	0.106087	5.49612	4.27418	8.49016	0.29192	6.55886	0.76226	0.070617	11.689	1651.11	95.5445	1688.4	69.973	1733.24	100.839	1379.18	156.44	4.73812	2.20851	1733.24	100.839
1SMBT4-164	0.106626	6.22268	4.16397	9.31851	0.282916	6.28279	0.74801	0.0796334	11.5322	1606.03	89.3219	1666.96	76.4398	1742.52	114.038	1548.69	172.662	7.83282	3.6551	1742.52	114.038
1SMBT4-208	0.106658	3.80524	4.4277	6.03009	0.300841	4.6355	0.77578	0.0889923	4.98874	1695.48	69.1106	1717.54	49.9881	1743.06	69.731	1723.15	82.5695	2.72994	1.28418	1743.06	69.731
1SMBT4-100	0.107959	4.21298	3.71973	6.43046	0.249686	5.03648	0.755982	0.0285275	8.39699	1436.86	64.8715	1575.62	51.5037	1765.26	76.9927	568.532	47.1293	18.6037	8.80701	1765.26	76.9927
1SMBT4-71	0.108374	3.64285	3.94083	5.25344	0.263551	4.07166	0.722449	0.0776661	6.60939	1507.98	54.7484	1622.11	42.5712	1772.25	66.5167	1511.83	96.5071	14.9115	7.03562	1772.25	66.5167
1SMBT4-257	0.109623	6.10748	4.07078	9.20681	0.26907	7.05283	0.748502	0.0561619	8.98722	1536.08	96.4038	1648.47	75.1856	1793.15	111.237	1104.43	96.8256	14.3359	6.81772	1793.15	111.237
1SMBT4-98	0.109919	3.24811	3.83194	4.86015	0.252634	3.5768	0.743921	0.0614871	6.40529	1452.05	46.5038	1599.48	39.1555	1798.07	59.1233	1206.08	75.1328	19.244	9.21761	1798.07	59.1233
1SMBT4-144	0.113013	6.98033	4.54809	11.7105	0.291559	9.47884	0.802955	0.0964752	6.70586	1649.32	137.96	1739.81	97.7756	1848.42	126.221	1861.56	119.611	10.7716	5.20155	1848.42	126.221
Rejected data
Analysis_name	bias_corr_samples_Pb207_Pb206	bias_corr_samples_Pb207_Pb206_err	bias_corr_samples_Pb207_U235	bias_corr_samples_Pb207_U235_err	bias_corr_samples_Pb206_U238	bias_corr_samples_Pb206_U238_err	rho	bias_corr_samples_Pb208_Th232	bias_corr_samples_Pb208_Th232_err	samples_Pb206_U238_age,	samples_Pb206_U238_age_err	samples_Pb207_U235_age	samples_Pb207_U235_age_err	samples_Pb207_Pb206_age	samples_Pb207_Pb206_age_err	samples_Pb208_Th232_age	samples_Pb208_Th232_age_err	discordance_Pb206U238_Pb207Pb206	discordance_Pb206U238_Pb207U235	best_age	best_age_err
1SMBT4-68	0.079232	5.72089	0.213147	10.9442	0.0194975	9.43576	0.852551	0.00546398	8.87661	124.479	11.6329	196.19	19.5269	1177.94	113.136	110.138	9.75233	89.4324	36.5518	124.479	11.6329
1SMBT4-29	0.147262	53.6979	1.11819	60.6787	0.0550231	28.3128	0.465678	0.0139644	46.5707	345.287	95.1955	762.109	337.113	2314.38	921.414	280.298	130.053	85.0808	54.6932	345.287	95.1955
1SMBT4-229	0.0975539	4.2961	0.825044	7.12593	0.0612988	5.68312	0.79783	0.00310177	6.68968	383.519	21.1603	610.859	32.7209	1577.88	80.408	62.5967	4.18148	75.694	37.2164	383.519	21.1603
1SMBT4-28	0.262144	20.491	2.57782	34.0337	0.0712576	27.2321	0.798438	0.0214038	22.8305	443.728	116.784	1294.36	254.164	3259.64	322.567	428.055	96.9313	86.3872	65.7185	443.728	116.784
1SMBT4-233	0.0960037	3.10572	0.988452	6.96189	0.0746268	6.21769	0.894983	0.00770887	8.88663	463.971	27.8347	697.93	35.1537	1547.84	58.3556	155.216	13.7453	70.0247	33.5219	463.971	27.8347
1SMBT4-70	0.0988514	3.50363	1.11399	9.39539	0.081677	8.84579	0.927967	0.00530531	11.9847	506.125	43.0589	760.094	50.3129	1602.56	65.3672	106.949	12.7877	68.4178	33.4129	506.125	43.0589
1SMBT4-209	0.0883432	5.48685	1.05852	8.90631	0.0868321	6.90941	0.787789	0.0630937	7.23858	536.775	35.5862	733.093	46.5345	1389.96	105.297	1236.65	87.0195	61.382	26.7794	536.775	35.5862
1SMBT4-194	0.107414	6.93307	1.28746	11.268	0.0868485	8.94674	0.788324	0.006902	29.1291	536.872	46.0876	840.173	64.4825	1756	126.846	139.026	40.3983	69.4265	36.0999	536.872	46.0876
1SMBT4-51	0.095468	16.2922	1.19977	22.9131	0.0910804	16.0585	0.703152	0.00370228	14.0619	561.924	86.4209	800.482	127.559	1537.32	306.546	74.6931	10.4866	63.448	29.8019	561.924	86.4209
1SMBT4-110	0.0956202	10.8459	1.23178	22.8958	0.093347	20.1682	0.880684	0.0031311	25.7178	575.302	111.012	815.148	129.002	1540.32	203.991	63.1876	16.2316	62.6505	29.4237	575.302	111.012
1SMBT4-33	0.0993257	3.917	1.30823	5.66111	0.095446	4.32798	0.723163	0.00348523	9.19117	587.665	24.3093	849.35	32.5901	1611.49	72.9958	70.3219	6.4532	63.5327	30.81	587.665	24.3093
1SMBT4-141	0.101911	2.17877	1.38898	6.48693	0.0987425	6.22662	0.942076	0.00424616	12.4621	607.035	36.0731	884.264	38.3141	1659.22	40.3458	85.6426	10.6531	63.4145	31.3514	607.035	36.0731
1SMBT4-160	0.0979932	3.23848	1.44244	10.41	0.106638	9.71843	0.95053	0.00718589	13.8692	653.193	60.3717	906.733	62.5029	1586.28	60.5473	144.724	20.0102	58.8224	27.9619	653.193	60.3717
1SMBT4-53	0.101573	7.32212	1.51298	20.0221	0.107956	18.5896	0.930735	0.00589071	28.2473	660.865	116.778	935.646	122.999	1653.05	135.695	118.715	33.4632	60.0215	29.368	660.865	116.778
1SMBT4-167	0.0931002	3.99464	1.40659	12.507	0.109454	11.4816	0.9481	0.00613608	24.6874	669.574	73.0232	891.72	74.3571	1489.93	75.6321	123.645	30.4545	55.0599	24.912	669.574	73.0232
1SMBT4-122	0.0921603	6.45023	1.39487	9.91626	0.109664	7.5249	0.759533	0.0322156	7.91826	670.797	47.9402	886.765	58.7102	1470.69	122.437	640.88	50.0123	54.389	24.3546	670.797	47.9402
1SMBT4-148	0.1323	6.183	2.00743	11.9277	0.109926	10.42	0.85535	0.0628093	7.77242	672.316	66.5285	1118.02	81.0126	2128.72	108.226	1231.24	93.0547	68.4169	39.8657	672.316	66.5285
1SMBT4-108	0.092473	3.40393	1.60706	8.65176	0.125933	8.13236	0.919577	0.0198486	14.4819	764.624	58.6374	972.963	54.2035	1477.12	64.5576	397.255	57.0488	48.2355	21.4129	764.624	58.6374
1SMBT4-224	0.0891026	4.27596	1.62633	6.34722	0.13229	4.50612	0.739625	0.0294921	4.77048	800.915	33.9386	980.441	39.9298	1406.37	81.8754	587.48	27.6411	43.0507	18.3107	800.915	33.9386
1SMBT4-23	0.340586	10.7869	6.31956	21.1958	0.134452	18.2974	0.86082	0.0276854	9.03575	813.211	139.815	2021.17	187.932	3665.4	164.803	551.978	49.2605	77.8139	59.7654	813.211	139.815
1SMBT4-242	0.0998287	4.3239	1.89026	7.17584	0.137233	5.69366	0.798084	0.0127547	7.59705	828.997	44.2921	1077.67	47.6877	1620.89	80.4818	256.171	19.3479	48.8556	23.0753	828.997	44.2921
1SMBT4-142	0.0875373	8.49862	1.65929	17.6578	0.137327	15.5245	0.876563	0.0273127	14.8941	829.532	120.853	993.104	112.328	1372.35	163.491	544.646	80.196	39.5539	16.4708	829.532	120.853
1SMBT4-150	0.0930316	6.16738	1.76842	9.96999	0.137712	8.11787	0.78621	0.0120717	8.07864	831.714	63.3454	1033.94	64.754	1488.53	116.791	242.535	19.4858	44.1252	19.5589	831.714	63.3454
1SMBT4-180	0.078899	5.92074	1.54166	8.56499	0.141568	6.14074	0.722617	0.0295685	8.3528	853.521	49.0919	947.169	52.7983	1169.6	117.231	588.979	48.5447	27.0246	9.88711	853.521	49.0919
1SMBT4-252	0.121381	12.0295	2.39195	17.5943	0.142798	12.7344	0.729771	0.0156784	13.7391	860.468	102.586	1240.19	126.633	1976.63	214.329	314.436	42.9118	56.468	30.6183	860.468	102.586
1SMBT4-03	0.097774	5.3173	1.98016	13.2638	0.146736	12.2415	0.916152	0.0166921	24.1706	882.639	100.986	1108.78	89.7193	1582.1	99.467	334.6	80.3687	44.2108	20.3952	882.639	100.986
1SMBT4-43	0.0956207	13.0697	1.96175	20.4199	0.148681	15.6874	0.768338	0.0127259	14.8054	893.563	130.913	1102.48	138.181	1540.33	245.817	255.595	37.6388	41.9889	18.9499	893.563	130.913
1SMBT4-168	0.104256	7.72311	2.17936	20.4611	0.151441	18.7182	0.926097	0.0461549	13.6644	909.038	158.735	1174.47	143.357	1701.22	142.262	912.004	122.219	46.5656	22.6004	909.038	158.735
1SMBT4-105	0.0998537	4.83872	2.10223	8.5448	0.152562	7.24358	0.824542	0.0192869	10.2087	915.306	61.811	1149.54	58.8605	1621.36	90.0588	386.12	39.0816	43.547	20.376	915.306	61.811
1SMBT4-05	0.102051	14.1811	2.17459	19.7069	0.15439	13.7645	0.694402	0.00558518	20.1192	925.526	118.685	1172.95	137.911	1661.76	262.517	112.575	22.5988	44.3044	21.0941	925.526	118.685
1SMBT4-15	0.403395	8.02212	8.73727	10.2876	0.156938	6.68827	0.62649	0.0693104	8.28997	939.737	58.4873	2310.97	93.9981	3921.78	120.507	1354.5	108.901	76.038	59.3358	939.737	58.4873
1SMBT4-66	0.112035	18.8558	2.43079	29.0853	0.157252	22.1901	0.761394	0.0244332	30.6436	941.485	194.436	1251.76	212.286	1832.68	341.754	487.914	148.266	48.628	24.7868	941.485	194.436
1SMBT4-95	0.100252	9.34038	2.18691	14.2368	0.158085	10.7316	0.754699	0.00727628	17.9268	946.127	94.4418	1176.88	99.5158	1628.77	173.68	146.537	26.1915	41.9117	19.6074	946.127	94.4418
1SMBT4-124	0.0997711	12.797	2.18246	20.0874	0.158493	15.4013	0.770819	0.0230026	12.3364	948.399	135.85	1175.46	140.769	1619.82	238.227	459.668	56.1445	41.4503	19.317	948.399	135.85
1SMBT4-87	0.0991786	7.01782	2.24442	13.5799	0.164005	11.6991	0.856135	0.0165424	19.7519	978.995	106.27	1195.04	95.67	1608.73	130.828	331.624	65.0724	39.1447	18.0785	978.995	106.27
1SMBT4-59	0.0869858	4.99065	2.00529	11.4162	0.16708	10.1433	0.899453	0.0379081	7.05934	996.001	93.6164	1117.3	77.497	1360.18	96.1687	752.041	52.1809	26.7744	10.8567	996.001	93.6164
1SMBT4-158	0.0883993	20.2562	3.13675	29.8412	0.257065	22.0153	0.73433	0.0656834	13.1576	1474.81	290.417	1441.75	233.802	1391.18	388.67	1285.83	164.583	-6.01178	-2.29284	1391.18	388.67
1SMBT4-202	0.094075	16.5073	2.95463	27.2985	0.227593	21.7607	0.796455	0.0416226	12.1238	1321.87	260.214	1396.04	210.039	1509.62	311.727	824.248	98.1578	12.437	5.31268	1509.62	311.727
1SMBT4-103	0.0944949	5.21163	2.59034	7.99188	0.198647	6.20271	0.758329	0.0103483	9.15234	1168.05	66.2684	1297.91	58.6114	1518.03	98.3083	208.088	18.9561	23.0548	10.0054	1518.03	98.3083
1SMBT4-205	0.0955336	10.9934	2.32175	17.4368	0.176115	13.52	0.776211	0.0163527	17.6538	1045.72	130.528	1218.96	124.368	1538.62	206.812	327.851	57.493	32.0353	14.2122	1538.62	206.812
1SMBT4-214	0.0972095	5.6399	2.76873	9.57849	0.206418	7.63157	0.808356	0.0157371	18.6784	1209.7	84.1794	1347.15	71.57	1571.26	105.65	315.604	58.5767	23.0104	10.2024	1571.26	105.65
1SMBT4-18	0.0973734	6.15848	2.65345	8.66695	0.197452	6.35944	0.704244	0.00459439	11.8018	1161.62	67.6015	1315.6	63.9997	1574.41	115.317	92.6501	10.9123	26.2189	11.7045	1574.41	115.317
1SMBT4-97	0.0985842	3.44986	2.48764	4.86211	0.182865	3.38544	0.704715	0.0124708	6.67153	1082.61	33.7391	1268.44	35.2278	1597.51	64.406	250.505	16.6162	32.2318	14.6508	1597.51	64.406
1SMBT4-248	0.0988973	5.7313	2.91397	9.77862	0.213529	7.75179	0.810428	0.0225937	11.081	1247.59	87.9333	1385.54	74.0532	1603.43	106.917	451.587	49.5463	22.1924	9.95652	1603.43	106.917
1SMBT4-58	0.0992878	8.36144	2.92633	14.6534	0.21361	11.9278	0.82125	0.0380428	11.007	1248.02	135.358	1388.74	111.337	1610.78	155.835	754.665	81.6993	22.5206	10.1333	1610.78	155.835
1SMBT4-200	0.0995449	4.70933	2.99053	7.02424	0.217692	5.28891	0.742044	0.0405084	9.29614	1269.67	60.9539	1405.21	53.4993	1615.59	87.7154	802.617	73.2831	21.4117	9.64582	1615.59	87.7154
1SMBT4-250	0.100102	10.7085	4.77642	15.2546	0.345785	10.74	0.712238	0.087338	9.54833	1914.44	177.935	1780.76	128.764	1625.98	199.191	1692.42	155.615	-17.7407	-7.5067	1625.98	199.191
1SMBT4-34	0.100674	7.02662	2.64527	12.4764	0.190409	10.4074	0.826364	0.0326526	19.5903	1123.59	107.323	1313.33	92.1832	1636.57	130.527	649.435	125.594	31.3446	14.4468	1636.57	130.527
1SMBT4-136	0.100835	4.49427	2.5105	8.48136	0.18038	7.31875	0.848188	0.0149989	10.4639	1069.05	72.1008	1275.07	61.6623	1639.53	83.4543	300.911	31.2779	34.7954	16.1578	1639.53	83.4543
1SMBT4-120	0.101046	9.232	3.00328	13.6394	0.215356	10.0349	0.736109	0.00833644	33.8766	1257.29	114.639	1408.45	104.262	1643.42	171.298	167.8	56.6889	23.4953	10.7323	1643.42	171.298
1SMBT4-119	0.101055	12.1211	2.92376	18.266	0.209636	13.6701	0.748101	0.0264193	8.48052	1226.88	152.75	1388.08	139.065	1643.59	224.9	527.06	44.1679	25.3536	11.6131	1643.59	224.9
1SMBT4-93	0.10121	6.89486	2.45374	10.8021	0.175696	8.3915	0.76983	0.0210476	9.43057	1043.42	80.8439	1258.52	78.0788	1646.43	127.884	421.004	39.3306	36.6254	17.0919	1646.43	127.884
1SMBT4-118	0.101284	6.00735	2.97803	10.0537	0.213049	8.07045	0.801851	0.0408663	11.2292	1245.04	91.379	1402.03	76.5668	1647.78	111.404	809.568	89.3083	24.441	11.1971	1647.78	111.404
1SMBT4-178	0.101299	10.4085	3.06109	15.5465	0.218933	11.4976	0.742812	0.0163737	10.7881	1276.24	133.144	1423.01	119.535	1648.05	193.014	328.27	35.1587	22.561	10.3144	1648.05	193.014
1SMBT4-83	0.101301	17.1894	2.58051	29.013	0.184616	23.4251	0.805592	0.0467666	6.70593	1092.14	235.441	1295.13	215.494	1648.1	318.758	923.821	60.6473	33.7332	15.6731	1648.1	318.758
1SMBT4-40	0.101595	3.73109	2.56218	5.09381	0.182764	3.45869	0.680796	0.0275193	8.17304	1082.05	34.4529	1289.91	37.2186	1653.46	69.1416	548.711	44.2916	34.5582	16.1142	1653.46	69.1416
1SMBT4-184	0.101831	4.41947	3.16043	7.03055	0.224866	5.4131	0.77776	0.0574407	5.44661	1307.53	64.0638	1447.55	54.2801	1657.77	81.8536	1128.88	59.889	21.1269	9.67251	1657.77	81.8536
1SMBT4-47	0.101961	4.22488	2.76006	7.96305	0.196181	6.67773	0.847696	0.0168056	8.11013	1154.77	70.6031	1344.81	59.4194	1660.12	78.2262	336.855	27.1112	30.4408	14.1314	1660.12	78.2262
1SMBT4-237	0.102205	14.2844	2.60388	24.275	0.184662	19.6176	0.808539	0.0258384	22.9501	1092.4	197.189	1301.73	179.95	1664.54	264.337	515.619	117.178	34.3726	16.0813	1664.54	264.337
1SMBT4-16	0.102216	12.0412	3.12243	16.5497	0.22134	11.4958	0.686074	0.0319424	10.9683	1288.95	134.321	1438.23	127.953	1664.74	222.821	635.53	68.7394	22.5733	10.3793	1664.74	222.821
1SMBT4-247	0.102216	8.77567	2.39745	13.4536	0.169978	10.065	0.758033	0.0200082	8.69385	1011.99	94.2707	1241.84	96.6885	1664.75	162.392	400.418	34.4986	39.2105	18.5087	1664.75	162.392
1SMBT4-201	0.10238	9.40717	2.94272	14.9963	0.208285	11.7135	0.778782	0.0237573	9.85116	1219.67	130.182	1392.97	114.128	1667.71	174.013	474.573	46.2593	26.8655	12.441	1667.71	174.013
1SMBT4-195	0.102452	4.92268	3.2484	7.90597	0.229742	6.27812	0.782582	0.0681124	5.86319	1333.15	75.6126	1468.79	61.4553	1669.01	91.0443	1331.84	75.713	20.1233	9.23518	1669.01	91.0443
1SMBT4-147	0.102544	4.48916	3.25149	6.48933	0.229717	5.14728	0.725297	0.0550418	24.9588	1333.02	61.9866	1469.53	50.4345	1670.67	83.0089	1082.98	264.913	20.2109	9.28979	1670.67	83.0089
1SMBT4-126	0.102936	15.6765	2.9725	22.1088	0.209228	15.5083	0.705156	0.0320305	13.8357	1224.7	173.021	1400.62	169.537	1677.72	289.617	637.255	86.9802	27.0021	12.5596	1677.72	289.617
1SMBT4-151	0.102974	22.7655	3.57004	34.6047	0.251167	26.1486	0.753132	0.0171538	10.0724	1444.49	338.699	1542.9	281.48	1678.4	420.548	343.776	34.3628	13.9363	6.37789	1678.4	420.548
1SMBT4-246	0.103158	25.567	4.52742	38.2691	0.318064	28.4283	0.744086	0.0570351	18.6615	1780.27	442.925	1736.02	329.363	1681.71	472.103	1121.13	204.554	-5.86048	-2.5486	1681.71	472.103
1SMBT4-216	0.103245	6.92442	2.98223	9.68491	0.209343	6.64466	0.699279	0.0204764	14.8825	1225.31	74.1512	1403.1	73.774	1683.26	127.837	409.693	60.4489	27.2059	12.6709	1683.26	127.837
1SMBT4-183	0.103829	14.7653	4.81506	21.9074	0.335999	16.1655	0.738743	0.0902754	17.4821	1867.39	262.229	1787.53	186.252	1693.67	272.238	1746.95	294.716	-10.2571	-4.4677	1693.67	272.238
1SMBT4-171	0.104009	10.9134	3.03684	18.5632	0.211534	14.9003	0.808954	0.0287339	19.2798	1236.98	167.748	1416.93	142.729	1696.86	201.138	572.588	109.139	27.1017	12.6997	1696.86	201.138
1SMBT4-234	0.10418	11.1662	2.54382	18.2966	0.176983	14.4886	0.792181	0.0244683	23.4984	1050.47	140.467	1284.67	134.131	1699.88	205.718	488.606	113.758	38.203	18.2301	1699.88	205.718
1SMBT4-42	0.104346	8.44933	3.28019	12.1506	0.227816	8.72826	0.718639	0.0391937	11.5007	1323.04	104.408	1476.36	94.8251	1702.82	155.608	777.061	87.8619	22.303	10.3852	1702.82	155.608
1SMBT4-64	0.105019	7.51091	2.93687	10.3807	0.202683	7.12429	0.690287	0.0355064	9.55144	1189.72	77.4009	1391.47	78.7879	1714.64	138.122	705.216	66.3054	30.6142	14.4991	1714.64	138.122
1SMBT4-211	0.105333	15.7911	4.23347	22.1985	0.291272	15.5544	0.702834	0.0822031	19.1705	1647.88	226.272	1680.54	184.33	1720.13	290.193	1596.74	296.489	4.20004	1.94288	1720.13	290.193
1SMBT4-163	0.105566	3.39525	2.72579	6.60546	0.18706	5.35472	0.859157	0.0741899	5.78425	1105.43	54.397	1335.51	49.1073	1724.19	62.3631	1446.53	80.9084	35.8869	17.228	1724.19	62.3631
1SMBT4-231	0.105677	11.4121	5.03422	16.576	0.345285	12.0152	0.725266	0.0854622	4.94197	1912.05	198.862	1825.1	141.323	1726.12	209.564	1657.52	78.7988	-10.7714	-4.76411	1726.12	209.564
1SMBT4-26	0.10573	17.5568	4.51848	25.539	0.309676	18.6327	0.726238	0.0842918	10.9706	1739.11	284.197	1734.38	215.507	1727.04	322.366	1635.72	173.117	-0.699092	-0.273041	1727.04	322.366
1SMBT4-154	0.106486	8.04412	3.43002	13.413	0.233356	10.9424	0.800356	0.0154976	7.10558	1352.06	133.483	1511.3	105.832	1740.12	147.462	310.838	21.9298	22.3005	10.5366	1740.12	147.462
1SMBT4-238	0.107315	5.33145	3.51321	8.55415	0.237286	6.66112	0.782023	0.0239953	10.578	1372.57	82.3552	1530.19	67.7125	1754.32	97.5636	479.271	50.1631	21.7604	10.3005	1754.32	97.5636
1SMBT4-74	0.109177	15.0616	3.81499	21.6518	0.253256	15.6268	0.718408	0.0772828	9.83188	1455.25	203.635	1595.91	175.929	1785.73	274.567	1504.64	143.067	18.5072	8.81418	1785.73	274.567
1SMBT4-80	0.109665	4.53357	3.49962	6.25453	0.231281	4.58517	0.690242	0.0442232	7.7345	1341.21	55.5223	1527.13	49.4325	1793.85	82.5638	874.649	66.3156	25.233	12.1745	1793.85	82.5638
1SMBT4-129	0.109949	3.84734	3.62844	6.56131	0.239105	5.40574	0.810162	0.0138219	15.5464	1382.04	67.2464	1555.79	52.2744	1798.56	70.0264	277.458	42.8855	23.1584	11.1679	1798.56	70.0264
1SMBT4-175	0.112044	5.90968	2.75625	8.575	0.178223	6.11933	0.724679	0.0162647	7.06292	1057.26	59.6721	1343.78	63.9738	1832.83	107.109	326.102	22.8605	42.3153	21.3217	1832.83	107.109
1SMBT4-78	0.125273	21.6893	3.94758	31.0195	0.228385	22.2627	0.714916	0.0459714	23.1907	1326.03	266.978	1623.5	256.634	2032.66	383.887	908.46	207.071	34.7638	18.3227	2032.66	383.887
1SMBT4-193	0.126651	14.0923	3.93256	19.9681	0.224985	14.1871	0.70847	0.0649194	14.5807	1308.16	168.009	1620.41	163.034	2051.99	248.862	1271.33	180.463	36.2493	19.2696	2051.99	248.862
1SMBT4-55	0.133584	7.0047	4.30343	9.67726	0.23348	6.48438	0.690274	0.0835492	11.2281	1352.71	79.1273	1694.02	79.8979	2145.61	122.373	1621.87	175.752	36.9544	20.1477	2145.61	122.373
1SMBT4-13	0.141214	4.48158	5.83972	6.22924	0.299631	4.56192	0.695527	0.0768803	8.1736	1689.48	67.8031	1952.32	54.0541	2242.15	77.4882	1497.08	118.289	24.6491	13.4631	2242.15	77.4882
1SMBT4-223	0.182555	23.5652	6.03514	38.1841	0.239606	30.0168	0.786848	0.0703648	23.0947	1384.65	374.442	1980.93	345.33	2676.22	389.895	1374.42	309.221	48.2611	30.1011	2676.22	389.895
1SMBT4-57	0.20472	5.6701	7.59025	8.26817	0.268713	5.80312	0.728294	0.293562	7.59073	1534.26	79.2368	2183.71	74.3129	2864.2	92.2322	5202.62	351.219	46.4331	29.7405	2864.2	92.2322
1SMBT4-215	0.266704	6.89322	10.4722	9.60539	0.284571	6.56116	0.696544	0.198854	6.36404	1614.34	93.7049	2477.46	89.2592	3286.75	108.242	3665.82	214.495	50.8833	34.8388	3286.75	108.242
1SMBT4-115	0.346778	4.78405	15.0213	7.40536	0.313879	5.66526	0.763318	0.187488	6.53993	1759.77	87.2512	2816.59	70.6131	3692.9	72.969	3473.27	209.789	52.3473	37.5215	3692.9	72.969
1SMBT4-52	0.426219	17.8562	24.008	24.8829	0.408235	17.2807	0.696451	1.27428	21.7746	2206.85	323.204	3268.72	247.332	4004.25	266.853	16607.7	2629.86	44.8875	32.4859	4004.25	266.853
1SMBT4-255	0.441	16.8313	24.6451	18.6953	0.404943	8.27648	0.435342	0.813106	14.5865	2191.76	153.809	3294.26	184.428	4055.13	250.862	12027.1	1367.41	45.9509	33.4672	4055.13	250.862
1SMBT4-22	0.503163	28.0662	14.5792	36.7851	0.209956	23.8185	0.646426	0.0198747	22.3909	1228.59	266.587	2788.18	364.415	4250.5	413.476	397.773	88.3872	71.0955	55.9359	4250.5	413.476
1SMBT4-35	0.593275	18.8581	57.7363	22.1097	0.705236	11.5698	0.522028	0.185388	16.1507	3440.47	308.693	4135.71	224.253	4491.61	274.31	3437.49	517.093	23.4023	16.8106	4491.61	274.31
1SMBT4-62	0.638465	36.0485	117.333	53.5594	1.33193	39.6047	0.739591	0.0263417	27.5629	5458.15	1483.91	4846.93	600.733	4598.07	522.094	525.533	143.493	-18.7052	-12.6103	4598.07	522.094
1SMBT4-54	0.684043	6.95683	46.2963	10.9465	0.490514	8.30007	0.772201	0.345449	7.58641	2572.9	176.126	3915.75	109.218	4697.56	100.382	5997.53	397.586	45.229	34.2937	4697.56	100.382
1SMBT4-210	0.722663	17.2468	80.8736	27.2335	0.811015	21.0413	0.773914	0.0417067	27.2784	3828.45	609.24	4472.94	280.038	4776.45	248.171	825.88	221.961	19.8475	14.4088	4776.45	248.171
Primary reference material
Analysis_name	bias_corr_pleis_Pb207_Pb206	bias_corr_pleis_Pb207_Pb206_err	bias_corr_pleis_Pb207_U235	bias_corr_pleis_Pb207_U235_err	bias_corr_pleis_Pb206_U238	bias_corr_pleis_Pb206_U238_err	rho	bias_corr_pleis_Pb208_Th232	bias_corr_pleis_Pb208_Th232_err	pleis_Pb206_U238_age,	pleis_Pb206_U238_age_err	pleis_Pb207_U235_age	pleis_Pb207_U235_age_err	pleis_Pb207_Pb206_age	pleis_Pb207_Pb206_age_err	pleis_Pb208_Th232_age	pleis_Pb208_Th232_age_err	discordance_Pb206U238_Pb207Pb206	discordance_Pb206U238_Pb207U235
Pleis 1	0.055543	7.43578	0.410077	8.6379	0.0534926	4.88912	0.511773	0.0202016	22.7941	335.929	16.0034	348.93	25.5124	434.148	165.588	404.25	91.4364	22.6234	3.72608
Pleis 2	0.0533123	6.90403	0.389329	8.26867	0.0529112	5.64885	0.563225	0.0157248	20.9206	332.37	18.2993	333.879	23.5318	342.111	156.275	315.361	65.5696	2.84725	0.451997
Pleis 3	0.0524684	6.39491	0.382961	7.00174	0.0528829	4.39702	0.446024	0.0148062	20.7919	332.197	14.2368	329.215	19.6895	305.877	145.664	297.073	61.4086	-8.60455	-0.905741
Pleis 4	0.0513678	7.34845	0.384809	8.99249	0.054278	6.08391	0.583804	0.016906	19.7994	340.733	20.1916	330.57	25.3779	257.367	168.862	338.852	66.6412	-32.3917	-3.07413
Pleis 5	0.0540708	7.00474	0.399617	9.28254	0.0535525	6.69688	0.659121	0.0183662	14.8943	336.295	21.944	341.37	26.9174	374.001	157.655	367.855	54.3667	10.0819	1.48682
Pleis 6	0.0525348	5.11121	0.401607	6.54693	0.0553964	5.00424	0.637625	0.0162062	12.8741	347.568	16.9326	342.813	19.0499	308.758	116.363	324.938	41.5409	-12.5697	-1.38686
Pleis 7	0.0529925	6.14042	0.395312	8.6657	0.0540606	6.11035	0.705621	0.0172683	9.94649	339.403	20.2023	338.243	24.9339	328.474	139.331	346.051	34.1558	-3.32733	-0.343139
Pleis 8	0.0520882	4.43209	0.387627	6.37302	0.0539328	3.79291	0.731378	0.0159174	9.24793	338.622	12.5121	332.635	18.0785	289.284	101.258	319.193	29.3081	-17.055	-1.79989
Pleis 9	0.0536155	6.68828	0.39448	9.89696	0.053325	7.14558	0.73725	0.0165619	10.6972	334.903	23.3199	337.637	28.4353	354.934	151.045	332.011	35.2565	5.64344	0.809687
Pleis 10	0.0542664	4.83106	0.401676	7.10027	0.0536469	6.02289	0.74069	0.0172981	8.944	336.873	19.7685	342.863	20.663	382.123	108.575	346.644	30.7629	11.8419	1.74723
Pleis 11	0.0542616	5.76946	0.400345	8.14735	0.0534721	6.56691	0.712269	0.0162904	10.6146	335.803	21.4875	341.898	23.6551	381.924	129.67	326.611	34.4191	12.0758	1.78273
Pleis 12	0.0532091	4.71784	0.395009	6.27627	0.0538003	4.73445	0.665471	0.0173563	10.2904	337.811	15.5817	338.022	18.0471	337.725	106.874	347.8	35.5151	-0.0255919	0.0623904
Pleis 13	0.0533023	4.35931	0.392586	6.75116	0.053374	5.81658	0.769152	0.0177563	9.46044	335.203	18.9992	336.257	19.3274	341.685	98.6818	355.746	33.3883	1.89721	0.313428
Pleis 14	0.0537083	3.6527	0.39321	7.5094	0.0530516	6.62832	0.873772	0.0160372	8.88572	333.23	21.5264	336.712	21.5233	358.839	82.4331	321.575	28.368	7.13677	1.0342
Pleis 15	0.0530276	3.45584	0.379815	7.84257	0.0518979	7.02509	0.89768	0.0172197	8.3446	326.163	22.3433	326.902	21.9234	329.98	78.3944	345.085	28.5718	1.15665	0.225997
Pleis 16	0.0526648	5.84592	0.391534	10.8673	0.0538647	9.38176	0.843226	0.0171755	9.04638	338.205	30.9119	335.49	31.0574	314.382	132.955	344.208	30.8983	-7.57774	-0.809454
Pleis 17	0.0536414	4.9097	0.399799	8.71253	0.0539974	7.59958	0.827323	0.0166648	8.30352	339.017	25.0982	341.503	25.272	356.026	110.856	334.056	27.5292	4.77755	0.727925
Pleis 18	0.0532886	3.75562	0.391423	6.03681	0.0532143	6.01211	0.805697	0.0159353	7.71811	334.225	19.582	335.408	17.2451	341.107	85.0249	319.55	24.4841	2.01742	0.352657
Pleis 19	0.0524259	4.5171	0.395286	8.76369	0.0546232	6.8047	0.861099	0.0168137	9.45475	342.843	22.72	338.224	25.2147	304.031	102.925	337.016	31.6246	-12.7658	-1.36578
Pleis 20	0.0527879	4.19187	0.393523	7.376	0.0540085	5.15952	0.833683	0.0167885	7.99198	339.085	17.043	336.94	21.1529	319.693	95.2452	336.515	26.6892	-6.06588	-0.636647
Pleis 21	0.054064	4.62336	0.467924	6.91114	0.0627069	4.98022	0.743645	0.0176662	7.33745	392.067	18.9439	389.754	22.3729	373.716	104.063	353.956	25.7617	-4.91028	-0.593485
Pleis 22	0.0540425	4.08736	0.402402	5.27711	0.0539514	3.8433	0.638817	0.0170959	7.11235	338.736	12.6825	343.389	15.3761	372.819	92.013	342.625	24.1777	9.14218	1.35514
Pleis 23	0.0526505	4.30731	0.392864	6.38691	0.0540702	5.06766	0.74028	0.0172497	6.92379	339.462	16.7577	336.46	18.2937	313.765	97.9728	345.681	23.7447	-8.18972	-0.89232
Pleis 24	0.053102	4.1066	0.385985	6.44534	0.0526769	4.35546	0.777423	0.0167831	6.93313	330.936	14.0501	331.432	18.2278	333.159	93.1034	336.409	23.1439	0.667373	0.149867
Pleis 25	0.0531153	4.44354	0.390952	7.20002	0.0533458	5.2154	0.789535	0.0164205	7.82181	335.03	17.0269	335.064	20.551	333.727	100.732	329.199	25.5569	-0.390586	0.0101243
Pleis 26	0.0530409	4.45602	0.399203	6.95022	0.0545516	5.13762	0.767967	0.016567	8.2556	342.405	17.1325	341.07	20.1372	330.549	101.073	332.112	27.2121	-3.58698	-0.391457
Pleis 27	0.0544994	4.21055	0.404399	7.23675	0.0537834	5.77294	0.813463	0.0173447	8.18837	337.708	18.9939	344.834	21.162	391.745	94.4684	347.57	28.2367	13.7939	2.06653
Pleis 28	0.053435	4.65098	0.453746	7.58826	0.0615351	5.30096	0.796149	0.0192092	8.50669	384.955	19.809	379.899	24.0535	347.313	105.178	384.579	32.4317	-10.8378	-1.33073
Pleis 29	0.0527221	3.80064	0.394674	5.30031	0.0542294	4.29012	0.704815	0.0166813	6.77767	340.435	14.2262	337.778	15.231	316.854	86.4002	334.385	22.4896	-7.44227	-0.786784
Pleis 30	0.0532972	4.11789	0.393569	5.7802	0.0534925	4.60548	0.707425	0.0167663	7.21425	335.928	15.0749	336.973	16.5769	341.468	93.2203	336.074	24.0591	1.62253	0.310191
Pleis 31	0.0533504	5.4415	0.389304	7.61267	0.0528589	5.75322	0.701439	0.0169029	6.98926	332.05	18.6199	333.861	21.6633	343.727	123.134	338.79	23.4952	3.39723	0.542603
Secondary reference material
Analysis_name	bias_corr_fc5z_Pb207_Pb206	bias_corr_fc5z_Pb207_Pb206_err	bias_corr_fc5z_Pb207_U235	bias_corr_fc5z_Pb207_U235_err	bias_corr_fc5z_Pb206_U238	bias_corr_fc5z_Pb206_U238_err	rho	bias_corr_fc5z_Pb208_Th232	bias_corr_fc5z_Pb208_Th232_err	fc5z_Pb206_U238_age,	fc5z_Pb206_U238_age_err	fc5z_Pb207_U235_age	fc5z_Pb207_U235_age_err	fc5z_Pb207_Pb206_age	fc5z_Pb207_Pb206_age_err	fc5z_Pb208_Th232_age	fc5z_Pb208_Th232_age_err	discordance_Pb206U238_Pb207Pb206	discordance_Pb206U238_Pb207U235
FC5Z 1	0.0759582	4.50997	1.92809	6.11258	0.183913	4.38459	0.676247	0.0519669	9.6634	1088.31	43.9082	1090.88	40.8914	1093.97	90.3009	1023.98	96.718	0.516954	0.235114
FC5Z 2	0.0745808	3.92334	1.9195	5.67494	0.186517	4.09256	0.722526	0.0548096	4.70451	1102.48	41.4727	1087.89	37.9029	1057.23	78.9888	1078.53	49.4701	-4.28018	-1.34064
FC5Z 3	0.0766987	3.60319	1.97	5.23271	0.18615	4.10563	0.727404	0.0567805	5.15321	1100.48	41.5362	1105.31	35.2567	1113.37	71.9369	1116.26	56.0414	1.15703	0.436563
FC5Z 4	0.0777083	3.33927	1.9177	5.76122	0.178809	4.68382	0.814896	0.0557771	4.83494	1060.47	45.8008	1087.27	38.4674	1139.43	66.4111	1097.06	51.6944	6.92971	2.46491
FC5Z 5	0.0771815	4.04123	1.9906	6.72409	0.186845	5.04485	0.800842	0.0562494	5.45613	1104.26	51.1991	1112.32	45.4757	1125.88	80.5327	1106.1	58.8142	1.92054	0.72495
FC5Z 6	0.0753664	3.60634	1.90975	5.31304	0.18362	4.00412	0.734595	0.0556701	3.81864	1086.72	40.0442	1084.5	35.4217	1078.29	72.3774	1095.01	40.7431	-0.781874	-0.204983
FC5Z 7	0.0763841	3.66669	2.06353	5.97219	0.195798	4.67373	0.789366	0.0568361	4.5973	1152.71	49.3333	1136.79	40.8684	1105.15	73.2941	1117.32	50.0346	-4.30283	-1.4001
FC5Z 8	0.0757658	3.98443	1.93675	5.83245	0.185163	4.51887	0.731558	0.0572337	3.87161	1095.12	45.5126	1093.88	39.0753	1088.89	79.8387	1124.93	42.4075	-0.57227	-0.113666
User-defined input parameters
pleis_Pb206_U238_known	0.0536372
pleis_Pb207_Pb206_known	0.053243
pleis_Pb207_U235_known	0.394138
pleis_Pb208_Th232_known	0.0168179
pleis_Pb206_U238_known_err	1
pleis_Pb207_Pb206_known_err	0.8
pleis_Pb207_U235_known_err	1.2
pleis_Pb208_Th232_known_err	1
fc5z_Pb206_U238_known	0.185154
fc5z_Pb207_Pb206_known	0.0762119
fc5z_Pb207_U235_known	1.94561
fc5z_Pb208_Th232_known	0.0557219
fc5z_Pb206_U238_known_err	0.75
fc5z_Pb207_Pb206_known_err	0.8
fc5z_Pb207_U235_known_err	1.25
fc5z_Pb208_Th232_known_err	1
reject_poly_order	3
reject_spline_breaks	5
outlier_cutoff_68	10
outlier_cutoff_76	10
outlier_cutoff_75	10
outlier_cutoff_82	25
replace_bad_rho	0.7
BL_xmin	0
BL_xmax	7
threshold_U238	5000
add_sec	5
int_time	14
filter_unc_cutoff	15
filter_transition_68_76	1000
filter_disc_transition	600
filter_disc_young	15
filter_disc_old	20
filter_disc_rev	10
poly_order	3

## Sheet: 1SMST9
Filtered data																								Smith, T.M., Saylor, J.E., Lapen, T.J., Hatfield, K., and Sundell, K.E., 2022, Identifying sources of non-unique detrital age distributions through integrated provenance analysis: An example from the Paleozoic Central Colorado Trough: Geosphere, v. 18, https://doi.org/10.1130/GES02541.1
Analysis_name	bias_corr_samples_Pb207_Pb206	bias_corr_samples_Pb207_Pb206_err	bias_corr_samples_Pb207_U235	bias_corr_samples_Pb207_U235_err	bias_corr_samples_Pb206_U238	bias_corr_samples_Pb206_U238_err	rho	bias_corr_samples_Pb208_Th232	bias_corr_samples_Pb208_Th232_err	samples_Pb206_U238_age,	samples_Pb206_U238_age_err	samples_Pb207_U235_age	samples_Pb207_U235_age_err	samples_Pb207_Pb206_age	samples_Pb207_Pb206_age_err	samples_Pb208_Th232_age	samples_Pb208_Th232_age_err	discordance_Pb206U238_Pb207Pb206	discordance_Pb206U238_Pb207U235	best_age	best_age_err
1SMST9_325	0.0595489	2.44295	0.334464	4.81984	0.0407198	4.14003	0.862038	0.011584	9.92399	257.293	10.4423	292.969	12.2667	587.222	53.0002	232.792	22.9828	56.1846	12.1772	257.293	10.4423
1SMST9_172	0.0615867	12.1117	0.548961	17.2362	0.0645774	12.3898	0.711537	0.00774035	11.9282	403.403	48.4499	444.316	62.1033	659.788	259.598	155.847	18.5267	38.8587	9.20809	403.403	48.4499
1SMST9_264	0.0598524	4.00789	0.551733	5.70111	0.0668031	3.98186	0.711304	0.0135918	4.48047	416.866	16.0738	446.131	20.5855	598.244	86.7905	272.87	12.1473	30.3184	6.55974	416.866	16.0738
1SMST9_274	0.0662208	4.75637	0.626198	9.44837	0.0685351	8.12579	0.864059	0.0087615	23.0832	427.324	33.5979	493.725	36.9587	813.364	99.4475	176.318	40.5635	47.4621	13.4489	427.324	33.5979
1SMST9_110	0.0603334	11.465	0.571082	16.1622	0.0686006	11.3351	0.704844	0.0114214	5.53322	427.719	46.9099	458.714	59.7216	615.553	247.554	229.544	12.6333	30.5146	6.75698	427.719	46.9099
1SMST9_64	0.0585631	5.99185	0.557151	8.29092	0.0689341	6.13533	0.692774	0.0187626	10.8358	429.731	25.506	449.671	30.1302	550.892	130.797	375.719	40.3763	21.9936	4.43426	429.731	25.506
1SMST9_294	0.0606747	3.32173	0.580952	4.49657	0.0694084	3.20797	0.675096	0.00794871	6.8738	432.591	13.422	465.073	16.7793	627.723	71.5773	160.026	10.9594	31.0857	6.98445	432.591	13.422
1SMST9_32	0.0605499	4.39308	0.582398	7.65652	0.069647	6.42017	0.819243	0.0180877	9.51037	434.029	26.9482	466.001	28.6207	623.282	94.7332	362.325	34.1803	30.3641	6.86104	434.029	26.9482
1SMST9_182	0.0638094	5.59252	0.614888	8.93669	0.0698101	7.35287	0.781101	0.0137106	8.19864	435.012	30.9307	486.638	34.5643	735.319	118.397	275.24	22.4254	40.8404	10.6088	435.012	30.9307
1SMST9_169	0.061713	5.89435	0.594903	8.79894	0.0698398	6.76672	0.742916	0.0139894	8.4173	435.19	28.4763	473.994	33.3371	664.178	126.246	280.798	23.4858	34.4769	8.18651	435.19	28.4763
1SMST9_173	0.0697553	6.45531	0.673326	8.92626	0.0699313	6.41231	0.691193	0.0136119	13.0589	435.742	27.0179	522.732	36.4864	921.158	132.701	273.271	35.4772	52.6963	16.6415	435.742	27.0179
1SMST9_135	0.0691223	5.69132	0.679627	8.12821	0.0712482	5.93517	0.714133	0.0124731	7.05682	443.671	25.4471	526.549	33.4072	902.392	117.36	250.549	17.5793	50.8339	15.7398	443.671	25.4471
1SMST9_42	0.0706731	10.6843	0.698111	12.9425	0.0715506	7.4008	0.564421	0.0260975	6.98667	445.491	31.8567	537.662	54.0776	947.975	218.747	520.723	35.9485	53.0061	17.1431	445.491	31.8567
1SMST9_291	0.0580831	9.34074	0.576239	14.9014	0.0719158	11.5774	0.779154	0.0127165	20.1711	447.688	50.0728	462.042	55.3691	532.898	204.528	255.409	51.2595	15.9901	3.10669	447.688	50.0728
1SMST9_24	0.0590106	4.07016	0.587647	7.46077	0.0720895	6.31817	0.838129	0.0229883	9.06867	448.732	27.3876	469.364	28.047	567.487	88.5979	459.385	41.2323	20.9265	4.39572	448.732	27.3876
1SMST9_208	0.0595862	6.69047	0.593108	8.25001	0.0721078	4.80798	0.5851	0.0168042	7.45328	448.842	20.8462	472.85	31.1968	588.583	145.117	336.829	24.9121	23.742	5.07743	448.842	20.8462
1SMST9_382	0.0840665	12.8312	0.842782	14.0388	0.0726365	5.78703	0.40581	0.0166112	15.5893	452.02	25.2626	620.68	65.2827	1294.09	249.549	332.991	51.5514	65.0705	27.1733	452.02	25.2626
1SMST9_37	0.0563593	8.25807	0.565927	11.314	0.0727202	7.85531	0.683638	0.0259916	11.7198	452.523	34.3285	455.377	41.541	466.549	182.862	518.637	60.0991	3.00631	0.626708	452.523	34.3285
1SMST9_15	0.0576741	5.95755	0.581752	9.6977	0.0729984	7.34659	0.789707	0.0244941	5.54415	454.195	32.2197	465.587	36.2312	517.403	130.796	489.115	26.8096	12.2163	2.44671	454.195	32.2197
1SMST9_14	0.0576635	4.02785	0.583181	7.76252	0.0731898	6.20103	0.856807	0.0250107	5.23258	455.345	27.2621	466.503	29.0418	516.999	88.436	499.303	25.8229	11.9255	2.39202	455.345	27.2621
1SMST9_59	0.0592936	5.18492	0.5993	7.40274	0.0732306	5.95747	0.718892	0.0250598	7.08488	455.59	26.2049	476.79	28.174	577.895	112.665	500.271	35.0389	21.1638	4.44631	455.59	26.2049
1SMST9_63	0.0570895	7.05028	0.577286	9.95069	0.0732682	7.35628	0.706452	0.0219228	12.306	455.816	32.3734	462.716	36.9961	494.993	155.385	438.321	53.4298	7.91468	1.49125	455.816	32.3734
1SMST9_23	0.058121	3.37	0.588505	6.9075	0.0732982	6.09746	0.872967	0.0252069	8.97749	455.996	26.8437	469.913	25.99	534.324	73.7728	503.171	44.6639	14.6594	2.96159	455.996	26.8437
1SMST9_51	0.0569056	6.98838	0.582235	10.2317	0.0741224	7.57132	0.730471	0.0155712	9.00627	460.944	33.6813	465.897	38.2483	487.878	154.21	312.303	27.9299	5.52069	1.06301	460.944	33.6813
1SMST9_66	0.0593708	5.80297	0.612808	8.56657	0.0747903	6.70883	0.737059	0.0216299	8.73411	464.951	30.0947	485.33	33.0622	580.72	126.035	432.527	37.4107	19.9354	4.19884	464.951	30.0947
1SMST9_157	0.0613537	6.00333	0.633913	10.1393	0.0748607	8.15386	0.805877	0.00843743	9.75418	465.373	36.609	498.53	39.9634	651.658	128.847	169.824	16.5023	28.5862	6.65095	465.373	36.609
1SMST9_76	0.0584636	3.63941	0.604833	5.3255	0.0749712	4.20496	0.732296	0.0250421	5.28853	466.036	18.9051	480.296	20.3824	547.18	79.4955	499.922	26.1311	14.8294	2.96894	466.036	18.9051
1SMST9_68	0.0623337	12.0932	0.645504	17.7813	0.0750375	13.2373	0.7332	0.00798029	25.3127	466.434	59.5643	505.708	70.9414	685.576	258.103	160.659	40.5467	31.9647	7.76623	466.434	59.5643
1SMST9_13	0.0581297	5.70629	0.603236	11.2095	0.0750981	8.16233	0.8728	0.0153001	9.08517	466.797	36.7551	479.285	42.8512	534.654	124.909	306.907	27.6914	12.6917	2.60553	466.797	36.7551
1SMST9_20	0.0574357	3.99972	0.596169	7.70956	0.0751279	6.65297	0.854933	0.0260884	8.70939	466.976	29.9694	474.8	29.2463	508.304	87.9499	520.544	44.807	8.13053	1.64779	466.976	29.9694
1SMST9_69	0.0606463	10.2024	0.629623	15.1513	0.0752285	11.4354	0.739463	0.017535	8.27255	467.579	51.5777	495.861	59.5073	626.711	219.882	351.351	28.835	25.3916	5.70358	467.579	51.5777
1SMST9_70	0.0587541	12.5331	0.611121	18.6091	0.0753704	13.8752	0.739221	0.0208803	18.5376	468.43	62.6924	484.267	71.7921	557.997	273.257	417.691	76.7811	16.0515	3.2703	468.43	62.6924
1SMST9_65	0.057866	10.6713	0.602972	15.0344	0.0755029	10.8376	0.704601	0.0255482	10.8966	469.224	49.0472	479.118	57.4847	524.69	233.991	509.899	54.9412	10.5712	2.06507	469.224	49.0472
1SMST9_320	0.0581851	4.71594	0.60603	6.74662	0.0755115	4.847	0.715122	0.0137925	10.1683	469.276	21.9377	481.053	25.8553	536.737	103.194	276.872	27.9804	12.5688	2.44827	469.276	21.9377
1SMST9_47	0.0562897	4.50794	0.588797	7.20246	0.0757724	5.75026	0.780126	0.02688	8.25612	470.839	26.1095	470.099	27.1089	463.812	99.8687	536.132	43.7291	-1.51522	-0.157503	470.839	26.1095
1SMST9_75	0.0599405	4.55616	0.626883	6.62439	0.0757891	5.06852	0.726919	0.0232873	7.54528	470.939	23.0187	494.152	25.9239	601.428	98.6103	465.292	34.7364	21.6965	4.69754	470.939	23.0187
1SMST9_104	0.0602008	4.09611	0.629601	7.72259	0.0757975	6.58798	0.847761	0.016894	5.42971	470.99	29.9225	495.847	30.3044	610.798	88.5139	338.613	18.2408	22.8894	5.01317	470.99	29.9225
1SMST9_240	0.058632	4.19388	0.614147	7.46629	0.0758922	6.09221	0.827414	0.0155003	13.299	471.557	27.7029	486.172	28.8523	553.458	91.5091	310.892	41.0708	14.7979	3.00609	471.557	27.7029
1SMST9_72	0.0748233	4.52929	0.784201	6.09021	0.0759488	4.45857	0.671275	0.0237413	7.38139	471.896	20.2883	587.877	27.1863	1063.76	91.0988	474.257	34.6289	55.6388	19.7288	471.896	20.2883
1SMST9_19	0.0565661	3.8151	0.5943	6.86682	0.0760421	5.29317	0.833844	0.0249669	3.6996	472.455	24.1135	473.61	25.9966	474.657	84.3603	498.44	18.223	0.463932	0.243751	472.455	24.1135
1SMST9_44	0.0579289	5.18864	0.61183	8.25816	0.0765052	6.54115	0.778093	0.0270443	8.14769	475.229	29.9675	484.713	31.8395	527.072	113.726	539.365	43.4112	9.83604	1.95669	475.229	29.9675
1SMST9_45	0.051391	34.2091	0.543308	37.2549	0.0765809	14.8047	0.396018	0.022656	47.979	475.682	67.8902	440.603	133.942	258.408	785.953	452.818	215.992	-84.0816	-7.96161	475.682	67.8902
1SMST9_16	0.0568307	3.87594	0.601432	7.2834	0.0765897	5.78311	0.848388	0.0247374	4.18848	475.735	26.5217	478.142	27.7812	484.969	85.5722	493.914	20.4471	1.9041	0.50354	475.735	26.5217
1SMST9_377	0.0598171	3.76794	0.633194	5.45006	0.0767021	4.06781	0.722896	0.0214627	5.82291	476.408	18.6806	498.084	21.4583	596.963	81.6118	429.218	24.7447	20.1948	4.35185	476.408	18.6806
1SMST9_29	0.0580357	3.86887	0.614917	8.70507	0.0767141	8.14155	0.896642	0.0246198	11.721	476.48	37.3943	486.657	33.6688	531.112	84.7401	491.594	57.0051	10.2863	2.09117	476.48	37.3943
1SMST9_57	0.0598191	9.59372	0.634043	13.1584	0.0767936	9.41693	0.685095	0.0262801	11.1469	476.956	43.2939	498.611	51.8879	597.036	207.793	524.319	57.7762	20.1127	4.34317	476.956	43.2939
1SMST9_21	0.0590381	4.004	0.62877	7.64088	0.0770935	6.57065	0.851743	0.0264744	9.43425	478.751	30.3176	495.329	29.9593	568.503	87.1427	528.145	49.2412	15.7874	3.3469	478.751	30.3176
1SMST9_179	0.0576262	12.2588	0.613588	18.2578	0.0771383	13.7858	0.741199	0.017879	20.636	479.019	63.6449	485.82	70.6091	515.579	269.221	358.181	73.3964	7.09107	1.39994	479.019	63.6449
1SMST9_25	0.0581456	5.92441	0.620186	10.3054	0.0772147	8.75091	0.8188	0.0282633	12.4467	479.476	40.4366	489.964	40.0755	535.252	129.671	563.34	69.2677	10.4206	2.14055	479.476	40.4366
1SMST9_40	0.0599185	6.29767	0.638908	9.03152	0.0772281	6.58221	0.71688	0.0251561	9.57084	479.556	30.4201	501.63	35.7647	600.632	136.321	502.17	47.5256	20.158	4.40038	479.556	30.4201
1SMST9_49	0.0602582	4.24023	0.642731	6.56108	0.077268	5.15188	0.76342	0.025181	6.48546	479.795	23.8211	503.996	26.0713	612.859	91.5967	502.662	32.2236	21.712	4.80173	479.795	23.8211
1SMST9_58	0.0587433	4.70817	0.626752	6.79362	0.0773015	5.61789	0.727707	0.0245474	6.23577	479.995	25.9863	494.07	26.583	557.597	102.658	490.165	30.2205	13.9172	2.84877	479.995	25.9863
1SMST9_348	0.0589611	5.0275	0.629203	7.3661	0.0773572	5.43346	0.730899	0.025881	5.7794	480.329	25.15	495.599	28.8935	565.661	109.471	516.458	29.4915	15.0855	3.08125	480.329	25.15
1SMST9_67	0.0592567	4.01354	0.632799	5.92815	0.0773795	4.93268	0.741508	0.0250634	5.62508	480.462	22.8381	497.838	23.3324	576.54	87.2315	500.343	27.8183	16.6646	3.49018	480.462	22.8381
1SMST9_26	0.0584436	5.05479	0.62474	9.50638	0.0773866	8.38422	0.847613	0.0247242	12.3189	480.505	38.8222	492.814	37.1325	546.433	110.426	493.653	60.1655	12.0653	2.4978	480.505	38.8222
1SMST9_80	0.0583283	7.65353	0.623588	10.7463	0.0774773	7.65774	0.702057	0.0238008	8.46686	481.047	35.4968	492.094	41.9333	542.117	167.321	475.431	39.8235	11.265	2.24476	481.047	35.4968
1SMST9_329	0.0582961	8.53756	0.623413	11.228	0.0775288	7.31368	0.649481	0.0204977	14.2286	481.356	33.9229	491.984	43.8076	540.908	186.686	410.116	57.8484	11.0098	2.16042	481.356	33.9229
1SMST9_73	0.0574337	3.68852	0.614468	5.38063	0.0775295	4.31841	0.731516	0.0245863	5.14993	481.36	20.03	486.374	20.7967	508.225	81.108	490.932	24.9935	5.28621	1.03093	481.36	20.03
1SMST9_28	0.0573226	2.91454	0.615047	8.13606	0.0776834	7.94832	0.934594	0.0257093	11.2608	482.28	36.9348	486.738	31.4707	503.964	64.1358	513.074	57.1297	4.30262	0.915835	482.28	36.9348
1SMST9_214	0.066396	12.7813	0.713041	13.9676	0.0777988	5.60743	0.403304	0.0129795	18.899	482.971	26.0928	546.55	59.1002	818.885	267.003	260.657	49.0046	41.0209	11.6329	482.971	26.0928
1SMST9_39	0.0572042	4.622	0.615554	7.99822	0.077932	6.67114	0.816316	0.0248866	9.45363	483.767	31.0918	487.057	30.953	499.414	101.789	496.857	46.4517	3.13314	0.675479	483.767	31.0918
1SMST9_288	0.057262	5.62585	0.615926	7.94901	0.0779689	5.57377	0.70649	0.0205282	9.45509	483.988	25.9887	487.291	30.7739	501.637	123.849	410.718	38.4785	3.51824	0.677803	483.988	25.9887
1SMST9_38	0.0592313	4.72619	0.63777	7.97543	0.0779794	6.57009	0.805704	0.0252599	10.338	484.051	30.6381	500.924	31.5453	575.607	102.737	504.217	51.5469	15.906	3.36847	484.051	30.6381
1SMST9_228	0.0579943	5.23652	0.624301	8.79275	0.0779895	7.11851	0.803343	0.0245099	8.53147	484.111	33.1996	492.539	34.3279	529.546	114.726	489.425	41.2958	8.57997	1.71123	484.111	33.1996
1SMST9_189	0.0591496	7.35181	0.63714	10.9039	0.0780336	7.95301	0.738573	0.0254966	8.50708	484.375	37.1111	500.534	43.1144	572.607	159.893	508.883	42.7959	15.4088	3.2284	484.375	37.1111
1SMST9_227	0.0565315	3.44635	0.609056	6.6195	0.0780535	5.72034	0.853841	0.0251073	7.31782	484.494	26.699	482.965	25.4467	473.304	76.2244	501.209	36.259	-2.36409	-0.316558	484.494	26.699
1SMST9_156	0.0547107	6.86791	0.589406	9.48111	0.0780566	6.51486	0.689406	0.0245562	6.94116	484.512	30.4085	470.488	35.7148	400.42	153.853	490.34	33.6538	-21.0011	-2.98072	484.512	30.4085
1SMST9_99	0.0581754	4.5972	0.627284	6.67565	0.0781479	4.84531	0.725092	0.0241222	4.5898	485.058	22.6402	494.402	26.1349	536.375	100.602	481.777	21.8629	9.56741	1.89003	485.058	22.6402
1SMST9_360	0.0583926	3.80482	0.629657	5.43869	0.0781556	3.76647	0.714901	0.026244	6.20185	485.104	17.6008	495.882	21.3401	544.522	83.1464	523.609	32.0819	10.9119	2.17348	485.104	17.6008
1SMST9_307	0.0577973	4.51982	0.623126	5.84663	0.0781597	3.77329	0.634422	0.0261692	5.76825	485.129	17.6335	491.805	22.7946	522.086	99.1511	522.135	29.7543	7.07873	1.35748	485.129	17.6335
1SMST9_117	0.0573152	4.55044	0.618258	7.41335	0.0781769	5.81166	0.789467	0.025307	5.72491	485.231	27.165	488.755	28.7662	503.683	100.139	505.147	28.581	3.66333	0.720958	485.231	27.165
1SMST9_246	0.0589017	4.82261	0.635523	7.87931	0.0781784	6.23624	0.790812	0.024876	6.29276	485.241	29.1501	499.531	31.0977	563.465	105.049	496.648	30.8956	13.8827	2.86071	485.241	29.1501
1SMST9_102	0.0575264	10.6907	0.620956	15.5402	0.0782321	11.3026	0.725774	0.0188228	11.7582	485.562	52.8665	490.446	60.5189	511.772	234.937	376.915	43.9557	5.12144	0.995856	485.562	52.8665
1SMST9_265	0.0583443	6.43488	0.630199	8.11633	0.0782766	4.88334	0.609492	0.0273198	7.36168	485.828	22.8527	496.22	31.8691	542.715	140.664	544.786	39.6086	10.4821	2.09431	485.828	22.8527
1SMST9_153	0.0585251	6.22803	0.632913	7.80052	0.0783565	4.84575	0.602404	0.0246676	6.19132	486.306	22.6983	497.909	30.7091	549.476	135.986	492.537	30.1485	11.4965	2.33039	486.306	22.6983
1SMST9_11	0.0577374	4.82972	0.625287	10.3784	0.0783691	7.61044	0.90084	0.023752	8.27156	486.381	35.6541	493.155	40.5642	519.812	105.991	474.468	38.8261	6.43141	1.37372	486.381	35.6541
1SMST9_187	0.0591039	11.2176	0.640135	16.484	0.0784612	12.0121	0.732743	0.0116531	22.3054	486.931	56.3375	502.39	65.4159	570.926	244.039	234.173	51.9988	14.7121	3.07693	486.931	56.3375
1SMST9_77	0.0574124	4.26558	0.62164	6.55304	0.0784659	5.2262	0.76006	0.0236964	7.13732	486.96	24.5121	490.875	25.5123	507.409	93.8103	473.37	33.421	4.03013	0.797589	486.96	24.5121
1SMST9_55	0.0594692	4.53568	0.64476	6.32275	0.0785491	5.19414	0.706183	0.0223106	6.87274	487.457	24.3857	505.249	25.1721	584.315	98.4504	445.991	30.3388	16.5764	3.52146	487.457	24.3857
1SMST9_308	0.0705547	19.9928	0.765116	23.2874	0.0786171	11.9614	0.512774	0.0271131	13.9911	487.863	56.2032	576.957	102.846	944.539	409.538	540.718	74.7875	48.3491	15.442	487.863	56.2032
1SMST9_241	0.0587888	4.32346	0.637909	7.42869	0.07862	5.9541	0.813278	0.0202687	19.9554	487.881	27.977	501.011	29.3854	559.284	94.2429	405.578	80.2873	12.7669	2.62071	487.881	27.977
1SMST9_296	0.0607675	5.43376	0.65947	6.74985	0.0786697	4.14012	0.59358	0.0235901	6.00576	488.178	19.4649	514.29	27.2429	631.014	117.023	471.271	27.9953	22.636	5.07727	488.178	19.4649
1SMST9_363	0.0579913	5.26429	0.630759	7.77058	0.0788298	5.63496	0.735631	0.0268724	6.13777	489.134	26.543	496.569	30.5273	529.435	115.337	535.981	32.4911	7.61193	1.49711	489.134	26.543
1SMST9_50	0.0595359	5.27184	0.6481	8.26251	0.0788598	6.47691	0.770123	0.0196236	6.77708	489.314	30.5197	507.309	33.003	586.751	114.382	392.795	26.3803	16.6062	3.54727	489.314	30.5197
1SMST9_61	0.0580314	3.87893	0.632055	5.50071	0.0789157	4.47401	0.715728	0.025117	6.59824	489.648	21.0957	497.375	21.6339	530.947	84.9628	501.399	32.703	7.77835	1.55361	489.648	21.0957
1SMST9_331	0.0580288	7.10504	0.631921	10.1999	0.0789483	7.33946	0.717482	0.0194555	7.47337	489.842	34.6201	497.292	40.125	530.848	155.629	389.463	28.848	7.72457	1.49811	489.842	34.6201
1SMST9_161	0.0571972	5.52465	0.623734	8.26348	0.0790085	6.2615	0.743787	0.0247436	6.11077	490.202	29.5562	492.185	32.2421	499.143	121.674	494.037	29.8455	1.7914	0.403009	490.202	29.5562
1SMST9_04	0.0569961	5.22126	0.622841	12.0086	0.0790602	9.04132	0.915002	0.0267117	9.20464	490.51	42.704	491.626	46.8306	491.382	115.146	532.818	48.4612	0.17736	0.226941	490.51	42.704
1SMST9_158	0.0582302	4.90418	0.636339	7.30312	0.0791773	5.38561	0.740996	0.0243238	5.49828	491.21	25.472	500.037	28.845	538.433	107.282	485.755	26.407	8.77051	1.76522	491.21	25.472
1SMST9_276	0.0586075	5.14623	0.640715	7.04517	0.0792345	4.58479	0.683748	0.0271737	5.11458	491.552	21.6989	502.749	27.9423	552.546	112.306	541.911	27.3668	11.0387	2.22711	491.552	21.6989
1SMST9_10	0.0602089	5.62603	0.659706	10.5227	0.0792804	7.25312	0.862674	0.0256137	8.20178	491.826	34.3462	514.434	42.4942	611.091	121.568	511.19	41.4434	19.5168	4.39479	491.826	34.3462
1SMST9_52	0.0575916	8.0408	0.63127	11.4001	0.0794087	8.17204	0.708928	0.0254351	11.3563	492.592	38.7558	496.886	44.824	514.259	176.628	507.67	57.0149	4.21307	0.864174	492.592	38.7558
1SMST9_121	0.0634615	6.56418	0.695739	8.90659	0.0794513	6.09835	0.675946	0.018873	8.15616	492.847	28.9355	536.243	37.1212	723.732	139.229	377.91	30.5596	31.9021	8.09266	492.847	28.9355
1SMST9_197	0.0576606	9.49348	0.632889	13.7763	0.0795136	9.84623	0.724719	0.0239737	12.1431	493.219	46.7529	497.894	54.2684	516.89	208.444	478.846	57.5452	4.57967	0.93905	493.219	46.7529
1SMST9_266	0.0578398	4.14935	0.635003	5.87314	0.0795618	4.08123	0.707835	0.0252507	5.81878	493.506	19.3895	499.208	23.165	523.7	90.999	504.036	28.9868	5.76539	1.14204	493.506	19.3895
1SMST9_86	0.0601698	4.31241	0.660715	6.20505	0.0795823	4.80833	0.72104	0.0125553	10.2989	493.629	22.8494	515.051	25.0716	609.686	93.2055	252.191	25.828	19.0355	4.15928	493.629	22.8494
1SMST9_03	0.0579549	5.20975	0.637635	11.9509	0.0795977	8.97133	0.914828	0.0259058	9.35835	493.721	42.6403	500.841	47.2825	528.057	114.169	516.947	47.8208	6.50235	1.42159	493.721	42.6403
1SMST9_115	0.0584691	4.62767	0.642478	7.96299	0.0796366	6.44344	0.813811	0.0241855	5.65523	493.953	30.639	503.839	31.6377	547.383	101.079	483.025	27.0104	9.76106	1.96215	493.953	30.639
1SMST9_368	0.0571698	3.90704	0.628261	5.11516	0.0796404	3.20678	0.645707	0.0250977	5.14602	493.976	15.249	495.012	20.0429	498.091	86.0634	501.019	25.4817	0.826202	0.209371	493.976	15.249
1SMST9_373	0.0592483	4.01934	0.651572	4.88613	0.0796901	2.88011	0.568986	0.0254319	6.38122	494.273	13.7035	509.446	19.5756	576.231	87.3623	507.607	32.0135	14.2231	2.97834	494.273	13.7035
1SMST9_345	0.0588408	7.63935	0.64691	10.5465	0.0796993	7.30801	0.689439	0.0255917	8.25858	494.327	34.7755	506.576	42.0881	561.211	166.468	510.756	41.6957	11.9178	2.41785	494.327	34.7755
1SMST9_388	0.0587299	6.00829	0.646324	8.09936	0.07973	5.52166	0.670687	0.0262678	7.30009	494.511	26.2843	506.214	32.297	557.096	131.018	524.078	37.8018	11.2342	2.31181	494.511	26.2843
1SMST9_81	0.0595154	11.0843	0.655164	15.943	0.0797794	11.5347	0.718787	0.0240461	10.3472	494.806	54.9405	511.652	64.1631	586.002	240.524	480.273	49.1689	15.5624	3.29243	494.806	54.9405
1SMST9_237	0.0592249	2.34099	0.652387	5.41607	0.0798092	4.7612	0.902056	0.0212361	4.29765	494.984	22.6852	509.947	21.7157	575.372	50.8899	424.736	18.0713	13.9714	2.93413	494.984	22.6852
1SMST9_259	0.0563936	5.35731	0.621123	7.32556	0.0798131	4.86452	0.682281	0.0258136	6.53904	495.007	23.1785	490.551	28.5067	467.898	118.601	515.129	33.2863	-5.79382	-0.908288	495.007	23.1785
1SMST9_114	0.0582878	4.1763	0.642247	7.39423	0.0798557	5.99556	0.825351	0.0240788	5.73738	495.262	28.5819	503.696	29.3702	540.597	91.3255	480.919	27.2849	8.38624	1.67461	495.262	28.5819
1SMST9_09	0.0570343	4.58869	0.63006	10.199	0.0799307	7.51642	0.909602	0.0271896	7.62469	495.709	35.8634	496.133	40.049	492.859	101.17	542.223	40.8344	-0.578198	0.085475	495.709	35.8634
1SMST9_152	0.0584213	6.40244	0.644745	9.27204	0.0799637	6.81183	0.72341	0.024446	8.95546	495.906	32.5139	505.24	36.922	545.597	139.886	488.165	43.24	9.1077	1.84742	495.906	32.5139
1SMST9_359	0.0578334	5.02221	0.63811	6.38221	0.0799714	3.98442	0.617111	0.0252762	5.93905	495.952	19.0198	501.135	25.2489	523.456	110.146	504.538	29.6155	5.2543	1.03428	495.952	19.0198
1SMST9_335	0.0579981	3.67508	0.640002	5.26743	0.0799987	3.84322	0.716511	0.0243763	4.46762	496.115	18.3516	502.308	20.875	529.689	80.5152	486.79	21.4996	6.33848	1.23286	496.115	18.3516
1SMST9_289	0.0591611	4.83314	0.653214	6.64998	0.0800353	4.48296	0.68698	0.0252646	7.05441	496.334	21.4155	510.455	26.6856	573.028	105.108	504.309	35.1664	13.3841	2.7664	496.334	21.4155
1SMST9_164	0.0581559	5.00754	0.642612	7.21332	0.0800566	5.59847	0.721821	0.0242513	6.05672	496.461	26.7511	503.922	28.6612	535.641	109.595	484.324	29.0063	7.31473	1.48063	496.461	26.7511
1SMST9_170	0.0591311	10.955	0.653577	15.9776	0.0800778	11.7636	0.727981	0.0270779	11.1674	496.587	56.2246	510.678	64.2084	571.928	238.286	540.027	59.596	13.1732	2.7592	496.587	56.2246
1SMST9_306	0.0564439	5.48937	0.624218	7.56771	0.0801736	5.25553	0.688389	0.0195055	15.1672	497.159	25.1463	492.488	29.5399	469.874	121.483	390.454	58.7378	-5.80688	-0.948521	497.159	25.1463
1SMST9_89	0.0589579	4.19426	0.652552	5.56255	0.0802153	3.85151	0.657767	0.0244544	5.09176	497.407	18.4373	510.048	22.3066	565.543	91.3294	488.331	24.5816	12.0477	2.47825	497.407	18.4373
1SMST9_53	0.0580671	5.92226	0.643221	9.28199	0.0802504	7.24954	0.770083	0.0246648	8.09634	497.617	34.7181	504.298	36.9085	532.296	129.689	492.482	39.4296	6.51492	1.32479	497.617	34.7181
1SMST9_217	0.0570362	4.86923	0.632163	7.27202	0.0802942	5.37437	0.742745	0.0231676	8.3031	497.878	25.7508	497.443	28.6065	492.932	107.354	462.927	38.0362	-1.00339	-0.0876118	497.878	25.7508
1SMST9_97	0.0577552	6.66915	0.640385	9.66325	0.0803605	6.99627	0.723661	0.018935	15.5457	498.274	33.5477	502.544	38.3226	520.488	146.341	379.141	58.4752	4.26782	0.849742	498.274	33.5477
1SMST9_100	0.0669512	5.40857	0.743906	8.75581	0.080529	6.92479	0.786417	0.0253624	5.80538	499.279	33.2694	564.682	37.9423	836.256	112.678	506.238	29.0449	40.2959	11.5822	499.279	33.2694
1SMST9_258	0.0588778	4.44435	0.654496	6.57261	0.0805523	4.70611	0.737024	0.0250243	4.60025	499.418	22.6159	511.242	26.4063	562.581	96.8239	499.571	22.7126	11.2272	2.31265	499.418	22.6159
1SMST9_84	0.059084	4.25124	0.656985	6.7878	0.0805867	5.58708	0.780728	0.0230742	6.57185	499.624	26.8602	512.768	27.3338	570.193	92.4972	461.083	29.9809	12.3764	2.56345	499.624	26.8602
1SMST9_358	0.058865	4.40669	0.654675	5.78703	0.0806104	3.79953	0.648245	0.025111	5.96922	499.765	18.2714	511.352	23.2527	562.106	96.0111	501.282	29.5763	11.0906	2.26586	499.765	18.2714
1SMST9_07	0.057779	8.48459	0.644106	13.6185	0.0806566	8.84745	0.795728	0.0268165	10.8783	500.041	42.5692	504.845	54.2251	521.393	186.148	534.88	57.5046	4.0952	0.951656	500.041	42.5692
1SMST9_361	0.0782875	7.21408	0.871414	11.1067	0.0806736	8.39048	0.760358	0.0299281	6.93835	500.142	40.3783	636.335	52.5604	1154.18	143.162	596.039	40.7926	56.6668	21.4026	500.142	40.3783
1SMST9_159	0.0576962	8.80672	0.642535	12.9615	0.0806878	9.49537	0.73372	0.0234637	10.9875	500.227	45.703	503.874	51.5275	518.243	193.32	468.776	50.9782	3.47639	0.723876	500.227	45.703
1SMST9_120	0.0592679	7.55191	0.659986	11.6351	0.080703	8.90476	0.760747	0.0235238	8.71517	500.317	42.8677	514.605	47.0045	576.951	164.124	469.962	40.5261	13.2825	2.7765	500.317	42.8677
1SMST9_98	0.0586414	4.27829	0.652994	6.13126	0.0807044	4.39722	0.716309	0.0254938	5.01917	500.326	21.1684	510.319	24.5982	553.807	93.3453	508.827	25.2359	9.65704	1.95822	500.326	21.1684
1SMST9_292	0.0576746	3.29475	0.642157	4.34414	0.0807106	2.69259	0.652569	0.0271174	4.51499	500.363	12.9631	503.641	17.2505	517.422	72.3348	540.802	24.1078	3.29693	0.650811	500.363	12.9631
1SMST9_36	0.0583503	4.74971	0.650719	8.26537	0.080761	6.90305	0.818567	0.023478	9.79005	500.664	33.2533	508.921	33.0953	542.942	103.823	469.058	45.4434	7.78684	1.62255	500.664	33.2533
1SMST9_257	0.0565074	2.88337	0.630078	4.09707	0.0807994	2.67818	0.712897	0.0259328	4.56688	500.893	12.9069	496.144	16.0815	472.361	63.7831	517.478	23.3461	-6.04014	-0.95702	500.893	12.9069
1SMST9_249	0.0564966	3.53283	0.630012	6.12466	0.0808012	5.03341	0.816886	0.0259095	4.78375	500.903	24.258	496.103	24.0409	471.938	78.1556	517.019	24.434	-6.13744	-0.967525	500.903	24.258
1SMST9_271	0.0570722	3.9502	0.636666	5.10871	0.0808486	3.14239	0.634421	0.0248091	5.54478	501.186	15.1526	500.24	20.1813	494.326	87.0707	495.329	27.1493	-1.38789	-0.189214	501.186	15.1526
1SMST9_48	0.0578003	7.47501	0.645295	11.4379	0.080874	8.74416	0.756936	0.0265255	11.4495	501.337	42.1771	505.579	45.5807	522.2	163.976	529.152	59.888	3.99512	0.838996	501.337	42.1771
1SMST9_93	0.0597641	7.11905	0.666997	10.5672	0.0808864	7.90379	0.739068	0.0201724	9.60033	501.411	38.1289	518.885	42.9576	595.043	154.245	403.671	38.4058	15.7353	3.36756	501.411	38.1289
1SMST9_226	0.0597622	7.61153	0.667418	9.37016	0.0809086	5.53592	0.583266	0.0318878	40.2588	501.544	26.7126	519.141	38.1008	594.976	164.918	634.461	253.037	15.7036	3.38971	501.544	26.7126
1SMST9_330	0.0576846	4.41814	0.64417	5.99008	0.0809591	4.0832	0.675294	0.0266078	4.43502	501.845	19.7141	504.884	23.8339	517.804	96.9918	530.772	23.2468	3.08214	0.602017	501.845	19.7141
1SMST9_129	0.057684	8.30546	0.644551	11.8933	0.0809737	8.69807	0.715942	0.0243779	8.93919	501.932	42.0026	505.12	47.365	517.779	182.331	486.821	43.0438	3.06053	0.631146	501.932	42.0026
1SMST9_181	0.0567824	5.54711	0.634866	7.52416	0.0809985	5.59635	0.678754	0.024834	6.41789	502.08	27.032	499.123	29.6764	483.091	122.508	495.818	31.4584	-3.93069	-0.592457	502.08	27.032
1SMST9_124	0.0585367	7.98356	0.654612	11.8795	0.0810428	9.03032	0.740763	0.0256031	8.10772	502.344	43.6415	511.313	47.7568	549.907	174.304	510.981	40.9511	8.64922	1.75406	502.344	43.6415
1SMST9_341	0.0586593	6.80165	0.655968	9.88981	0.0810672	7.2009	0.725957	0.0259203	5.649	502.49	34.8098	512.145	39.7989	554.474	148.384	517.233	28.8684	9.37543	1.88522	502.49	34.8098
1SMST9_304	0.0572963	4.35287	0.640717	5.55386	0.0810678	3.52888	0.621232	0.0264937	5.44916	502.493	17.059	502.75	22.0255	502.957	95.8034	528.526	28.447	0.0922267	0.0510591	502.493	17.059
1SMST9_378	0.0576542	5.32091	0.645241	7.37573	0.0810925	5.20869	0.692643	0.0244438	5.34089	502.641	25.1865	505.546	29.3798	516.646	116.834	488.123	25.7743	2.71084	0.574614	502.641	25.1865
1SMST9_162	0.0577494	4.22992	0.646406	6.01038	0.0810969	4.4357	0.710944	0.0250462	5.80495	502.667	21.4497	506.264	23.9652	520.266	92.8206	500.005	28.6893	3.38271	0.710582	502.667	21.4497
1SMST9_343	0.0572129	4.14673	0.640122	5.48439	0.0811078	3.63183	0.654506	0.0261655	5.41957	502.732	17.5646	502.382	21.7376	499.75	91.3169	522.063	27.9506	-0.596629	-0.0697147	502.732	17.5646
1SMST9_126	0.057851	7.01412	0.647715	9.91825	0.0811378	7.30313	0.707603	0.0240349	9.51881	502.91	35.3324	507.072	39.6084	524.124	153.815	480.053	45.2075	4.04748	0.820626	502.91	35.3324
1SMST9_356	0.0567525	9.60881	0.635411	13.801	0.0811523	9.92497	0.717812	0.0245017	8.61133	502.997	48.0252	499.461	54.4987	481.929	212.253	489.263	41.6692	-4.37161	-0.707944	502.997	48.0252
1SMST9_35	0.0586256	4.4921	0.657216	7.94521	0.081183	6.69648	0.825019	0.0235496	9.32	503.18	32.4141	512.909	32.0043	553.221	98.02	470.471	43.388	9.04534	1.89695	503.18	32.4141
1SMST9_277	0.0574574	4.1659	0.64383	5.68769	0.081214	3.58675	0.682829	0.0264542	4.5143	503.365	17.3676	504.674	22.6231	509.131	91.5909	527.747	23.5294	1.13252	0.259415	503.365	17.3676
1SMST9_183	0.0586287	4.6709	0.657454	6.9937	0.0812383	5.70711	0.747431	0.0251106	5.83697	503.51	27.6424	513.055	28.1755	553.336	101.92	501.273	28.92	9.00471	1.86055	503.51	27.6424
1SMST9_379	0.0575062	3.8685	0.64475	5.47029	0.0812384	4	0.70743	0.0249186	7.19456	503.511	19.374	505.243	21.777	511	85.025	497.487	35.3861	1.46562	0.342866	503.511	19.374
1SMST9_174	0.057937	4.59614	0.649779	7.5314	0.0812516	6.5252	0.795376	0.024068	6.07874	503.589	31.6097	508.343	30.1282	527.38	100.734	480.706	28.8968	4.51114	0.935116	503.589	31.6097
1SMST9_376	0.0582756	9.31452	0.653744	13.188	0.0812871	9.39172	0.707938	0.0252544	13.7693	503.8	45.5146	510.78	52.9837	540.14	203.702	504.109	68.6701	6.72779	1.36643	503.8	45.5146
1SMST9_74	0.0576532	3.98386	0.646895	6.09167	0.0813108	4.95378	0.758484	0.024676	5.83029	503.942	24.0134	506.566	24.3006	516.609	87.4761	492.703	28.3987	2.45191	0.518061	503.942	24.0134
1SMST9_245	0.0579282	2.93257	0.650085	6.24896	0.0813131	5.52397	0.883045	0.0262644	4.32095	503.956	26.7782	508.531	25.0028	527.048	64.2769	524.01	22.3636	4.38148	0.899755	503.956	26.7782
1SMST9_336	0.0582375	3.53836	0.653227	5.00684	0.0813156	3.61652	0.70766	0.0258337	4.89441	503.971	17.532	510.462	20.0901	538.709	77.4002	515.526	24.9283	6.44849	1.27173	503.971	17.532
1SMST9_317	0.0580216	5.07073	0.651168	7.61704	0.081364	5.70435	0.746217	0.0261146	8.16179	504.259	27.6686	509.197	30.5105	530.578	111.075	521.06	42.028	4.96049	0.969818	504.259	27.6686
1SMST9_185	0.0571308	4.07086	0.642896	6.00555	0.0815216	4.23072	0.735872	0.0253928	5.22276	505.198	20.5576	504.097	23.8668	496.587	89.6951	506.838	26.1587	-1.73415	-0.218412	505.198	20.5576
1SMST9_168	0.0587434	3.4876	0.661112	5.71533	0.0815363	4.98879	0.795958	0.0248869	4.74723	505.286	24.2452	515.294	23.1005	557.6	76.0446	496.863	23.3131	9.38199	1.94214	505.286	24.2452
1SMST9_238	0.0566669	4.41548	0.637743	7.48438	0.08154	5.94432	0.807543	0.025466	5.53766	505.308	28.8903	500.908	29.6012	478.593	97.5918	508.279	27.8149	-5.58211	-0.878512	505.308	28.8903
1SMST9_82	0.0612231	11.7835	0.68892	17.249	0.0815503	12.6653	0.730298	0.0261295	20.0272	505.37	61.5639	532.151	71.5601	647.081	253.096	521.354	103.341	21.9001	5.03274	505.37	61.5639
1SMST9_138	0.0582386	3.77406	0.655879	5.46873	0.0816065	4.14887	0.724503	0.0221051	4.42053	505.705	20.1792	512.09	21.9978	538.748	82.5556	441.927	19.3327	6.13331	1.2469	505.705	20.1792
1SMST9_05	0.056981	4.47596	0.642979	11.4147	0.0816394	8.66388	0.936968	0.024932	8.78128	505.901	42.1555	504.149	45.3888	490.797	98.7198	497.752	43.2214	-3.07732	-0.34751	505.901	42.1555
1SMST9_327	0.0583976	5.64563	0.658009	8.03763	0.0816893	5.71028	0.711784	0.0263965	5.97515	506.198	27.7998	513.396	32.4004	544.712	123.369	526.612	31.0834	7.07056	1.40197	506.198	27.7998
1SMST9_248	0.0571784	3.65731	0.644855	6.73096	0.0817182	5.65638	0.839502	0.0259598	4.89255	506.37	27.5464	505.308	26.8005	498.42	80.5578	518.01	25.0374	-1.59513	-0.210329	506.37	27.5464
1SMST9_119	0.0581599	3.83679	0.655833	7.19099	0.0817231	6.04264	0.845783	0.0245561	5.08475	506.4	29.4291	512.062	28.9276	535.792	83.9702	490.338	24.6475	5.48574	1.10575	506.4	29.4291
1SMST9_85	0.0567369	6.96845	0.639827	9.89551	0.0817289	7.25094	0.710352	0.0260436	7.96849	506.434	35.3162	502.199	39.2237	481.323	153.945	519.662	40.9228	-5.2172	-0.843359	506.434	35.3162
1SMST9_297	0.0577511	4.16245	0.651185	5.56169	0.0817392	3.83566	0.663739	0.026444	5.40607	506.495	18.6839	509.207	22.2749	520.333	91.3389	527.547	28.1702	2.65933	0.532581	506.495	18.6839
1SMST9_384	0.0580398	2.35189	0.654849	3.22715	0.081746	2.43399	0.687945	0.0252236	4.76121	506.536	11.8571	511.458	12.9675	531.265	51.5123	503.502	23.6905	4.65463	0.962334	506.536	11.8571
1SMST9_134	0.0585927	3.50894	0.662105	5.23883	0.0818855	4.0844	0.743429	0.0241389	4.60309	507.367	19.9284	515.901	21.1932	551.994	76.5829	482.106	21.9411	8.08459	1.65409	507.367	19.9284
1SMST9_163	0.0570044	4.4307	0.644561	6.6666	0.0819219	5.124	0.747487	0.0243851	5.03471	507.584	25.0111	505.126	26.5367	491.703	97.7062	486.964	24.2388	-3.22989	-0.486693	507.584	25.0111
1SMST9_236	0.0581629	2.99944	0.657764	5.6884	0.0819358	4.70921	0.849973	0.0268837	4.63189	507.667	22.9901	513.245	22.9214	535.902	65.643	536.205	24.5247	5.26873	1.08685	507.667	22.9901
1SMST9_318	0.0574434	3.03811	0.649518	4.13809	0.0819748	2.85066	0.679026	0.0263272	5.18421	507.899	13.9228	508.182	16.5464	508.597	66.8016	525.247	26.897	0.13714	0.0556116	507.899	13.9228
1SMST9_370	0.0633073	9.60633	0.716228	13.6362	0.0819874	9.71657	0.709735	0.0269921	10.0492	507.974	47.464	548.438	57.8453	718.572	203.924	538.337	53.4552	29.3078	7.37795	507.974	47.464
1SMST9_244	0.0568832	3.5066	0.643845	6.79198	0.0820116	5.82232	0.856417	0.0258875	4.72353	508.118	28.4486	504.684	27.0177	487.006	77.3908	516.586	24.1063	-4.3351	-0.680511	508.118	28.4486
1SMST9_191	0.0576673	4.95581	0.653352	6.48073	0.0820755	3.99018	0.645056	0.0245228	7.40022	508.5	19.5105	510.539	26.0094	517.143	108.808	489.681	35.8338	1.67148	0.399499	508.5	19.5105
1SMST9_262	0.0571179	4.82247	0.64717	6.77778	0.0821086	4.70083	0.702734	0.0250111	6.94444	508.696	22.9939	506.736	27.0458	496.088	106.265	499.312	34.2787	-2.54151	-0.38697	508.696	22.9939
1SMST9_300	0.0571492	4.81293	0.647315	6.89692	0.0821106	4.99583	0.716302	0.0269456	5.47755	508.708	24.4374	506.825	27.5252	497.297	106.033	537.422	29.0706	-2.29465	-0.37158	508.708	24.4374
1SMST9_350	0.0564958	5.22015	0.639959	7.54892	0.0821117	5.52883	0.722436	0.0249967	6.34172	508.715	27.045	502.281	29.9199	471.904	115.484	499.028	31.2837	-7.80044	-1.28101	508.715	27.045
1SMST9_316	0.0576394	4.96299	0.652927	6.99417	0.0821247	4.95174	0.704623	0.0269143	5.59076	508.792	24.2256	510.279	28.06	516.081	108.985	536.807	29.6383	1.41235	0.291258	508.792	24.2256
1SMST9_218	0.0578685	3.23067	0.656141	4.86451	0.0821413	3.59684	0.747662	0.0253857	6.95201	508.891	17.6002	512.251	19.5715	524.787	70.8383	506.697	34.8177	3.02899	0.655892	508.891	17.6002
1SMST9_362	0.0572772	10.6365	0.649163	15.2112	0.0821424	10.8319	0.71488	0.0256677	11.5076	508.898	53.0046	507.964	60.8699	502.221	234.13	512.255	58.2916	-1.32943	-0.183918	508.898	53.0046
1SMST9_106	0.0753223	10.4999	0.853784	13.0167	0.0821512	7.73648	0.591042	0.0351483	9.80482	508.95	37.861	626.724	60.9456	1077.12	210.765	698.226	67.4031	52.7488	18.7919	508.95	37.861
1SMST9_78	0.0543773	6.94556	0.616473	8.32514	0.0821576	4.86139	0.55224	0.0235554	8.98938	508.988	23.7924	487.634	32.2488	386.709	155.971	470.585	41.8574	-31.6205	-4.37906	508.988	23.7924
1SMST9_273	0.0592296	4.20508	0.671523	5.6739	0.0821703	3.72696	0.671525	0.0263555	5.50984	509.064	18.2429	521.638	23.1492	575.547	91.4099	525.805	28.6177	11.5512	2.41051	509.064	18.2429
1SMST9_112	0.0592448	6.97455	0.671797	10.865	0.082181	8.25339	0.7668	0.0249286	5.7116	509.128	40.4043	521.804	44.36	576.104	151.598	497.685	28.0982	11.6257	2.42936	509.128	40.4043
1SMST9_155	0.058914	3.89924	0.66836	6.73704	0.0821981	5.46844	0.815495	0.0240929	4.36458	509.23	26.7756	519.715	27.411	563.919	84.9289	481.198	20.7649	9.69807	2.01754	509.23	26.7756
1SMST9_272	0.0558507	3.15769	0.633478	4.67239	0.0822038	3.35261	0.737333	0.026399	4.88013	509.264	16.4167	498.26	18.4007	446.439	70.1677	526.662	25.3858	-14.0725	-2.20845	509.264	16.4167
1SMST9_251	0.0569408	6.16493	0.646602	9.19579	0.0822837	6.8455	0.741997	0.0252199	6.42503	509.74	33.5506	506.385	36.6823	489.242	136.007	503.428	31.9712	-4.1896	-0.662424	509.74	33.5506
1SMST9_192	0.0562447	3.52996	0.638916	5.28452	0.082292	3.7346	0.745172	0.0249469	4.76059	509.789	18.3053	501.635	20.9211	462.04	78.2268	498.045	23.4337	-10.3344	-1.62557	509.789	18.3053
1SMST9_250	0.0577132	3.74364	0.655691	6.32275	0.0823226	5.12514	0.805886	0.0259647	4.68156	509.971	25.1298	511.975	25.43	518.89	82.1691	518.108	23.9615	1.71886	0.391431	509.971	25.1298
1SMST9_323	0.0582605	3.75809	0.661552	4.45244	0.0823228	2.43261	0.536354	0.0230797	5.39036	509.972	11.9276	515.563	18.0021	539.572	82.1946	461.191	24.5933	5.48574	1.08434	509.972	11.9276
1SMST9_122	0.0574279	7.65853	0.652656	11.4235	0.0823615	8.53198	0.742	0.0264076	5.74355	510.203	41.8529	510.112	45.8381	508.002	168.412	526.831	29.8899	-0.433263	-0.0179071	510.203	41.8529
1SMST9_260	0.057784	9.02772	0.65712	13.1689	0.0824074	9.55694	0.728043	0.0257226	8.70144	510.476	46.9051	512.851	53.0719	521.581	198.058	513.337	44.1535	2.12897	0.463004	510.476	46.9051
1SMST9_90	0.0572524	3.14468	0.651087	4.85947	0.0824197	3.89993	0.763391	0.0232128	4.71739	510.549	19.1431	509.147	19.4599	501.267	69.2322	463.82	21.6427	-1.85175	-0.27537	510.549	19.1431
1SMST9_397	0.0584601	6.11265	0.665852	7.76763	0.0825068	5.0939	0.618176	0.0253464	8.78544	511.068	25.0282	518.187	31.5355	547.048	133.522	505.922	43.9436	6.57696	1.3738	511.068	25.0282
1SMST9_103	0.0571917	11.1673	0.651136	16.5	0.0825147	12.1689	0.736161	0.0246766	7.8729	511.115	59.7969	509.178	66.1632	498.931	245.955	492.714	38.3583	-2.44198	-0.380472	511.115	59.7969
1SMST9_255	0.0584692	3.75634	0.665885	4.83719	0.082525	2.82645	0.63184	0.0259635	5.09559	511.177	13.8902	518.208	19.635	547.388	82.0469	518.083	26.0807	6.61519	1.35674	511.177	13.8902
1SMST9_319	0.0591026	4.89087	0.672781	7.01463	0.0825274	5.05143	0.716847	0.024775	6.40551	511.191	24.8253	522.402	28.6539	570.876	106.402	494.655	31.3249	10.4551	2.1461	511.191	24.8253
1SMST9_270	0.0571167	6.99237	0.6506	8.94045	0.0825525	5.51526	0.623178	0.0251696	9.28356	511.341	27.1124	508.848	35.7966	496.042	154.081	502.436	46.1216	-3.08415	-0.489808	511.341	27.1124
1SMST9_118	0.0585265	5.34078	0.667055	8.49247	0.0826012	6.56676	0.777511	0.025309	8.13392	511.63	32.2991	518.92	34.5178	549.528	116.612	505.185	40.6228	6.89643	1.40488	511.63	32.2991
1SMST9_154	0.0579704	3.37425	0.661253	5.3819	0.0826482	4.359	0.779638	0.024886	4.09407	511.91	21.4512	515.38	21.7552	528.642	73.9377	496.845	20.1032	3.16514	0.673337	511.91	21.4512
1SMST9_195	0.0588209	4.37408	0.671083	6.40914	0.0826491	4.38548	0.732499	0.026453	6.10321	511.915	21.5818	521.371	26.1399	560.474	95.3271	527.725	31.8164	8.66378	1.81353	511.915	21.5818
1SMST9_125	0.057512	5.75291	0.656013	8.47039	0.0826624	6.5432	0.734933	0.02447	6.54427	511.995	32.2053	512.172	34.0835	511.219	126.437	488.639	31.6191	-0.151824	0.034567	511.995	32.2053
1SMST9_213	0.0575956	4.84373	0.658021	5.94307	0.0827656	3.39228	0.579495	0.0251959	6.48969	512.609	16.7158	513.403	23.9536	514.412	106.397	502.956	32.2632	0.35042	0.154496	512.609	16.7158
1SMST9_334	0.0572499	4.1541	0.654291	5.92544	0.082854	4.28777	0.713177	0.0259627	5.31275	513.135	21.1493	511.116	23.8007	501.171	91.4569	518.067	27.1922	-2.38722	-0.395049	513.135	21.1493
1SMST9_252	0.0584089	5.18421	0.667876	7.68619	0.0828554	5.70142	0.738298	0.0250833	7.82011	513.144	28.1225	519.42	31.2615	545.133	113.278	500.735	38.714	5.86823	1.20833	513.144	28.1225
1SMST9_328	0.0568709	12.9318	0.650114	18.1205	0.0828756	12.6885	0.700497	0.026226	7.74384	513.264	62.6024	508.549	72.6132	486.532	285.428	523.255	40.0396	-5.4944	-0.927172	513.264	62.6024
1SMST9_88	0.0573831	7.1753	0.656218	10.6707	0.0828794	8.09892	0.740393	0.024517	8.00382	513.287	39.9593	512.298	42.9547	506.288	157.832	489.565	38.7503	-1.38226	-0.193056	513.287	39.9593
1SMST9_295	0.0574763	3.44316	0.657727	4.62033	0.0829543	3.25545	0.667832	0.0269325	4.66578	513.732	16.0753	513.223	18.6159	509.856	75.6914	537.164	24.748	-0.760355	-0.0993006	513.732	16.0753
1SMST9_253	0.0576378	3.42937	0.660346	5.88977	0.0830177	4.82011	0.813021	0.0270131	4.72896	514.11	23.8184	514.826	23.7893	516.022	75.3084	538.75	25.1564	0.370531	0.138954	514.11	23.8184
1SMST9_313	0.0578088	3.8984	0.662129	4.79065	0.0830375	2.82583	0.581275	0.0277485	5.11553	514.228	13.9667	515.916	19.38	522.523	85.5126	553.218	27.9356	1.58756	0.327087	514.228	13.9667
1SMST9_196	0.0814666	12.4381	0.934093	18.3841	0.0830622	13.4371	0.736399	0.0090457	6.82749	514.375	66.4338	669.786	90.3919	1232.72	244.03	182.012	12.3748	58.2733	23.203	514.375	66.4338
1SMST9_230	0.0573882	4.06187	0.658026	6.95551	0.0830714	5.63876	0.81177	0.02723	7.29108	514.43	27.8804	513.406	28.0363	506.483	89.3444	543.018	39.1026	-1.56903	-0.199395	514.43	27.8804
1SMST9_352	0.0579248	6.23027	0.664185	8.97577	0.0831148	6.52532	0.719893	0.0260573	5.92877	514.688	32.2795	517.171	36.3894	526.919	136.56	519.931	30.4554	2.32133	0.480113	514.688	32.2795
1SMST9_247	0.0579916	3.78092	0.665351	7.13399	0.0831327	6.05501	0.848006	0.0243595	6.10181	514.794	29.9589	517.882	28.9484	529.444	82.8373	486.458	29.3497	2.76693	0.596181	514.794	29.9589
1SMST9_349	0.0581169	5.00559	0.666545	6.80839	0.0831378	4.67301	0.677893	0.0272972	6.77947	514.825	23.1223	518.609	27.6563	534.173	109.58	544.34	36.4437	3.6221	0.729699	514.825	23.1223
1SMST9_268	0.0563455	3.31258	0.646438	4.67391	0.0831447	3.20188	0.705776	0.0256724	4.75993	514.866	15.8443	506.284	18.6355	466.007	73.3586	512.349	24.0953	-10.4846	-1.69502	514.866	15.8443
1SMST9_366	0.0582847	3.96223	0.668763	5.851	0.0831559	4.23303	0.735916	0.0262935	5.26604	514.933	20.9495	519.96	23.8132	540.48	86.6459	524.583	27.2878	4.72685	0.966852	514.933	20.9495
1SMST9_399	0.0593197	7.02254	0.681715	9.79663	0.0832468	7.04515	0.697579	0.0254218	8.60355	515.474	34.9022	527.811	40.3446	578.848	152.571	507.408	43.1577	10.9484	2.33738	515.474	34.9022
1SMST9_284	0.0721965	6.49777	0.829585	7.91074	0.083289	4.45974	0.570413	0.0301146	7.10665	515.724	22.1041	613.382	36.4369	991.486	132.138	599.698	42.0361	47.9847	15.9211	515.724	22.1041
1SMST9_385	0.0608075	6.60784	0.699234	8.67919	0.0833129	5.71432	0.648426	0.0264702	10.136	515.867	28.3298	538.334	36.2797	632.431	142.275	528.063	52.9007	18.4311	4.17337	515.867	28.3298
1SMST9_344	0.0585191	3.04414	0.672836	4.24853	0.0833496	3.01501	0.697675	0.0265822	4.48355	516.085	14.9535	522.435	17.3527	549.251	66.4696	530.268	23.4793	6.03846	1.21554	516.085	14.9535
1SMST9_287	0.0578518	3.69872	0.665398	5.39661	0.083372	3.86953	0.728275	0.0246946	4.94747	516.219	19.1964	517.91	21.8969	524.155	81.1098	493.069	24.1137	1.51421	0.326646	516.219	19.1964
1SMST9_203	0.0582046	4.59139	0.6699	6.55756	0.0833768	4.42615	0.715105	0.0227034	6.74189	516.247	21.959	520.652	26.7173	537.474	100.456	453.756	30.2735	3.94934	0.846013	516.247	21.959
1SMST9_263	0.0570405	4.80545	0.656785	6.25317	0.0834423	3.92753	0.639981	0.0250274	6.41995	516.637	19.4993	512.646	25.1754	493.098	105.945	499.634	31.7079	-4.77373	-0.77854	516.637	19.4993
1SMST9_128	0.0579128	3.72196	0.667133	5.69364	0.0834798	4.76724	0.760624	0.0247824	4.87424	516.86	23.6781	518.968	23.1386	526.466	81.5872	494.801	23.839	1.82462	0.4062	516.86	23.6781
1SMST9_312	0.0554692	7.18232	0.638873	9.91116	0.0835003	6.84675	0.689098	0.0261945	8.55813	516.982	34.0146	501.608	39.25	431.183	160.027	522.633	44.2026	-19.8984	-3.06481	516.982	34.0146
1SMST9_389	0.0580765	4.49812	0.66967	5.33377	0.0835384	3.03391	0.538265	0.0357611	53.0652	517.208	15.0787	520.512	21.725	532.65	98.4966	710.188	373.753	2.89904	0.634628	517.208	15.0787
1SMST9_290	0.057076	4.90484	0.658183	6.41089	0.0835908	4.03435	0.644107	0.0269819	5.12406	517.52	20.0626	513.502	25.8438	494.47	108.11	538.136	27.2289	-4.66155	-0.782488	517.52	20.0626
1SMST9_139	0.0576785	3.39572	0.665567	4.88207	0.0836157	3.72201	0.719743	0.0239676	4.60178	517.668	18.5144	518.014	19.8116	517.571	74.5495	478.724	21.7827	-0.0188381	0.0666685	517.668	18.5144
1SMST9_178	0.0582032	3.03824	0.671869	5.43098	0.0836282	5.21971	0.837974	0.0225184	5.08275	517.743	25.9681	521.848	22.1646	537.419	66.475	450.097	22.6372	3.66113	0.786668	517.743	25.9681
1SMST9_151	0.0590956	5.13119	0.682138	7.72296	0.0836363	5.89377	0.747533	0.0267824	5.4894	517.791	29.3242	528.066	31.8102	570.62	111.635	534.21	28.9615	9.25816	1.94569	517.791	29.3242
1SMST9_143	0.0582701	5.32372	0.673376	7.36214	0.0837356	5.32682	0.691466	0.0260314	6.02285	518.382	26.5323	522.763	30.0902	539.931	116.43	519.421	30.909	3.99109	0.838034	518.382	26.5323
1SMST9_210	0.0576287	3.29025	0.66638	4.44975	0.083768	2.93662	0.673373	0.0260515	6.2481	518.574	14.6322	518.509	18.07	515.674	72.2577	519.817	32.0901	-0.562378	-0.0126759	518.574	14.6322
1SMST9_243	0.057208	4.04618	0.66145	6.76985	0.0837751	5.33081	0.801867	0.0264762	5.06003	518.617	26.5638	515.5	27.3731	499.559	89.1058	528.182	26.3972	-3.81501	-0.604561	518.617	26.5638
1SMST9_233	0.0572386	5.86871	0.662108	9.5762	0.0838074	7.56156	0.790205	0.0254512	8.80785	518.809	37.6933	515.902	38.7528	500.738	129.215	507.988	44.2337	-3.60884	-0.563338	518.809	37.6933
1SMST9_354	0.0576329	7.74857	0.667054	11.1594	0.083895	8.08226	0.719647	0.0267085	8.01388	519.33	40.3279	518.919	45.3701	515.835	170.163	532.756	42.1806	-0.677384	-0.0790284	519.33	40.3279
1SMST9_229	0.0566111	12.9427	0.655693	19.3078	0.0839127	14.3548	0.742061	0.0265252	16.814	519.435	71.6417	511.976	77.7914	476.416	286.103	529.146	88.0075	-9.02978	-1.45697	519.435	71.6417
1SMST9_282	0.0579862	5.85924	0.671419	8.55052	0.0839278	6.17019	0.728339	0.0260505	6.98826	519.525	30.7982	521.575	34.8901	529.242	128.376	519.797	35.8935	1.83599	0.393061	519.525	30.7982
1SMST9_351	0.0580815	7.60141	0.672822	10.6846	0.0839691	7.56382	0.702771	0.0256047	9.55976	519.77	37.7717	522.427	43.6623	532.839	166.445	511.013	48.2969	2.45274	0.508489	519.77	37.7717
1SMST9_105	0.057764	9.38539	0.669599	14.6329	0.0840133	11.2562	0.767219	0.0242811	12.2633	520.033	56.2388	520.468	59.6572	520.821	205.932	484.911	58.8442	0.151251	0.083625	520.033	56.2388
1SMST9_141	0.0581362	3.5887	0.675459	4.83071	0.0841889	3.60178	0.673303	0.0257594	4.66689	521.078	18.0296	524.026	19.777	534.899	78.5525	514.062	23.7021	2.58398	0.562649	521.078	18.0296
1SMST9_127	0.0582913	3.78326	0.677277	6.21677	0.0841991	5.33827	0.795984	0.0256476	4.89537	521.138	26.7251	525.127	25.4945	540.73	82.7287	511.859	24.7579	3.62309	0.759585	521.138	26.7251
1SMST9_171	0.0587529	3.78656	0.683033	5.94425	0.0842247	4.90985	0.772694	0.0222552	4.48461	521.29	24.5872	528.606	24.4997	557.952	82.5582	444.894	19.7434	6.57076	1.38393	521.29	24.5872
1SMST9_365	0.0601555	6.11083	0.699189	8.72976	0.0842364	6.18465	0.714165	0.0256608	7.73645	521.36	30.9751	538.306	36.4898	609.172	132.087	512.119	39.16	14.4149	3.14806	521.36	30.9751
1SMST9_188	0.0576033	6.1625	0.670067	7.87431	0.0842694	4.73631	0.622883	0.024789	6.67795	521.556	23.7297	520.753	32.0901	514.707	135.358	494.932	32.6763	-1.33068	-0.154196	521.556	23.7297
1SMST9_393	0.0752704	9.70054	0.877348	10.9234	0.0844377	5.11952	0.459834	0.0345867	11.7033	522.557	25.697	639.549	51.8793	1075.73	194.759	687.258	79.2347	51.4231	18.293	522.557	25.697
1SMST9_372	0.0557298	7.25543	0.649437	10.4739	0.0844446	7.59192	0.721221	0.0268441	6.09778	522.598	38.1101	508.132	41.8973	441.621	161.36	535.424	32.246	-18.3363	-2.84682	522.598	38.1101
1SMST9_332	0.0576044	5.2408	0.67128	7.75594	0.0844827	5.74457	0.737172	0.024275	7.5517	522.824	28.8485	521.491	31.6417	514.748	115.112	484.791	36.2068	-1.56888	-0.255728	522.824	28.8485
1SMST9_202	0.0572416	2.93721	0.66761	4.91174	0.0844897	3.62879	0.804159	0.0245968	5.65638	522.866	18.2247	519.258	19.9687	500.852	64.6693	491.141	27.4647	-4.3953	-0.694765	522.866	18.2247
1SMST9_387	0.0565997	6.48213	0.660085	8.58124	0.0844932	5.71037	0.655361	0.0221503	10.6922	522.886	28.6801	514.666	34.6592	475.97	143.301	442.82	46.8866	-9.85707	-1.59727	522.886	28.6801
1SMST9_136	0.0629261	9.9359	0.73388	10.8176	0.0845105	4.45514	0.395764	0.025492	6.87168	522.989	22.3799	558.828	46.5234	705.735	211.362	508.792	34.5557	25.8944	6.41321	522.989	22.3799
1SMST9_02	0.0562668	5.87437	0.657877	12.5355	0.0845871	9.35055	0.89607	0.026863	10.2754	523.445	47.0114	513.315	50.5503	462.911	130.161	535.797	54.4053	-13.0768	-1.97347	523.445	47.0114
1SMST9_239	0.0572509	6.93079	0.668407	10.0932	0.0845894	7.25615	0.727004	0.0254792	6.54951	523.458	36.4821	519.743	41.0803	501.211	152.588	508.541	32.9182	-4.43878	-0.71475	523.458	36.4821
1SMST9_160	0.0579175	3.61791	0.676258	5.77878	0.0845977	4.66347	0.780227	0.0242819	4.57256	523.508	23.4487	524.51	23.6764	526.643	79.3041	484.928	21.9217	0.595376	0.191122	523.508	23.4487
1SMST9_396	0.0602301	8.43613	0.703464	11.9313	0.0846065	8.61191	0.707306	0.0248856	8.60787	523.56	43.3068	540.858	50.0703	611.852	182.266	496.837	42.2899	14.4302	3.19817	523.56	43.3068
1SMST9_193	0.0583283	2.98757	0.681655	4.50356	0.0846602	3.13658	0.750211	0.0237064	4.1494	523.879	15.782	527.774	18.5379	542.116	65.3138	473.568	19.4312	3.36392	0.737954	523.879	15.782
1SMST9_06	0.0567477	5.40727	0.664032	12.1206	0.0846614	9.08142	0.909142	0.0263463	10.7644	523.887	45.6952	517.077	49.1497	481.743	119.447	525.623	55.9279	-8.74823	-1.31693	523.887	45.6952
1SMST9_324	0.0638962	5.54579	0.746244	7.39404	0.0846712	4.8778	0.6614	0.0302057	5.39555	523.944	24.5461	566.043	32.0946	738.197	117.353	601.485	32.0006	29.0237	7.43729	523.944	24.5461
1SMST9_390	0.058321	4.49799	0.681811	5.78773	0.0846931	3.77551	0.62971	0.027147	7.0762	524.075	19.0036	527.869	23.8289	541.843	98.339	541.386	37.8364	3.27918	0.718691	524.075	19.0036
1SMST9_212	0.0585734	3.80671	0.686828	5.1151	0.0849467	3.36489	0.668023	0.025255	6.4502	525.582	16.9835	530.893	21.1506	551.276	83.0919	504.121	32.1402	4.66084	1.00042	525.582	16.9835
1SMST9_305	0.0579317	5.84018	0.679033	7.20807	0.0849739	4.2816	0.586167	0.0258482	12.1883	525.743	21.6168	526.19	29.6076	527.179	128.004	515.812	62.1686	0.272364	0.084845	525.743	21.6168
1SMST9_219	0.0576563	3.54097	0.676616	5.70149	0.0850164	4.43616	0.783783	0.0263154	7.09719	525.996	22.4075	524.727	23.367	516.727	77.7497	525.015	36.815	-1.79371	-0.241799	525.996	22.4075
1SMST9_314	0.0571985	5.40727	0.67169	7.65487	0.0851355	5.43975	0.707835	0.027156	5.27639	526.703	27.5123	521.739	31.2405	499.195	119.087	541.563	28.2153	-5.51057	-0.951456	526.703	27.5123
1SMST9_91	0.0572574	6.70862	0.672933	9.29607	0.0851783	6.54946	0.692353	0.0243765	5.52808	526.958	33.1402	522.494	37.9862	501.463	147.69	486.794	26.6064	-5.08407	-0.854218	526.958	33.1402
1SMST9_149	0.05707	5.7364	0.67169	7.83439	0.0852798	5.67014	0.682338	0.0246907	8.89536	527.56	28.7223	521.74	31.9736	494.239	126.444	492.992	43.3695	-6.74194	-1.11568	527.56	28.7223
1SMST9_392	0.0585966	5.6577	0.690332	7.92396	0.0853452	5.63633	0.700234	0.0162419	12.0665	527.949	28.5712	533	32.8708	552.14	123.477	325.648	39.0171	4.38141	0.947618	527.949	28.5712
1SMST9_280	0.0567776	5.12544	0.668923	7.4296	0.0853931	5.3122	0.723991	0.0265459	5.12243	528.234	26.9421	520.057	30.2457	482.907	113.199	529.554	26.7915	-9.38615	-1.57221	528.234	26.9421
1SMST9_222	0.0568065	2.61304	0.66961	5.54572	0.085396	4.69844	0.882752	0.0259247	5.69485	528.251	23.8299	520.475	22.5874	484.03	57.6996	517.319	29.1077	-9.136	-1.49394	528.251	23.8299
1SMST9_200	0.0564795	5.38391	0.666669	8.09539	0.0855091	5.84971	0.747196	0.0259692	8.00998	528.922	29.7053	518.685	32.8913	471.266	119.12	518.196	41.0214	-12.2344	-1.97366	528.922	29.7053
1SMST9_215	0.0645928	7.42186	0.76245	10.2226	0.0855125	7.00914	0.68767	0.0273893	9.16507	528.942	35.5944	575.423	44.9333	761.099	156.474	546.154	49.4456	30.5028	8.07761	528.942	35.5944
1SMST9_242	0.064041	3.27127	0.756549	6.04719	0.0855955	4.98252	0.841228	0.0297638	7.06672	529.436	25.3252	572.017	26.452	742.986	69.169	592.814	41.3264	28.7422	7.44416	529.436	25.3252
1SMST9_130	0.0581082	5.57404	0.686512	8.3603	0.0856151	6.48158	0.745881	0.0257054	5.71968	529.552	32.9516	530.703	34.5683	533.845	122.031	512.998	28.9934	0.804148	0.216862	529.552	32.9516
1SMST9_137	0.0575101	3.53712	0.679742	4.8669	0.0856473	3.56723	0.688328	0.0250953	5.68692	529.743	18.1416	526.618	20.0005	511.15	77.7397	500.973	28.1593	-3.63753	-0.593339	529.743	18.1416
1SMST9_175	0.0570785	5.25116	0.675278	8.18208	0.0857096	6.80827	0.769437	0.0262358	8.81387	530.113	34.6477	523.916	33.5002	494.567	115.742	523.448	45.5951	-7.18738	-1.18275	530.113	34.6477
1SMST9_367	0.058724	4.2143	0.694587	5.85561	0.0857189	3.98891	0.694407	0.0282117	7.04167	530.168	20.3017	535.553	24.3752	556.878	91.9011	562.325	39.0891	4.7963	1.00544	530.168	20.3017
1SMST9_142	0.057348	7.49925	0.67942	10.8121	0.0858462	7.9485	0.720511	0.0254465	7.92034	530.924	40.5099	526.424	44.4423	504.94	164.997	507.895	39.7649	-5.14589	-0.854804	530.924	40.5099
1SMST9_140	0.0569141	13.1931	0.674466	19.0542	0.0858711	13.8391	0.721529	0.0230818	6.62618	531.072	70.5523	523.424	78.0835	488.208	291.112	461.232	30.2386	-8.77992	-1.46115	531.072	70.5523
1SMST9_144	0.0573997	4.375	0.680402	6.36633	0.0858918	4.88932	0.727583	0.0271091	5.58041	531.195	24.9306	527.017	26.1799	506.925	96.2246	540.641	29.792	-4.78766	-0.792638	531.195	24.9306
1SMST9_286	0.0580119	4.40764	0.68953	5.88096	0.0861568	3.83259	0.662113	0.0259155	4.9579	532.768	19.5979	532.518	24.3752	530.209	96.5558	517.138	25.3298	-0.482466	-0.0469086	532.768	19.5979
1SMST9_301	0.0568884	5.09344	0.676221	6.61868	0.0861716	4.29172	0.638655	0.0216956	7.43983	532.856	21.9491	524.488	27.1183	487.211	112.408	433.827	31.9574	-9.36867	-1.59541	532.856	21.9491
1SMST9_279	0.0576593	9.82218	0.68573	14.1882	0.0861996	10.1341	0.721671	0.0251822	8.56514	533.022	51.8453	530.232	58.6687	516.839	215.663	502.686	42.5695	-3.13113	-0.526157	533.022	51.8453
1SMST9_221	0.057541	5.56122	0.688093	8.87479	0.0866328	6.78108	0.779468	0.025068	7.9647	535.592	34.8514	531.654	36.7475	512.327	122.201	500.434	39.4071	-4.54095	-0.740719	535.592	34.8514
1SMST9_235	0.0585192	7.25217	0.700811	11.303	0.0867659	8.60116	0.767053	0.0268342	6.5288	536.382	44.2686	539.275	47.3243	549.256	158.353	535.229	34.5149	2.34388	0.536453	536.382	44.2686
1SMST9_302	0.058515	5.58871	0.700578	7.74164	0.0867948	5.40873	0.692026	0.0275637	5.44531	536.553	27.846	539.136	32.3944	549.097	122.034	549.584	29.5449	2.28441	0.479015	536.553	27.846
1SMST9_278	0.0578968	3.65819	0.693843	5.50236	0.086861	3.84229	0.748682	0.0276944	4.0409	536.946	19.7952	535.107	22.8897	525.859	80.1978	552.154	22.022	-2.10834	-0.343613	536.946	19.7952
1SMST9_132	0.0568655	4.17365	0.681896	6.5357	0.0868953	5.33686	0.770899	0.0249802	4.58814	537.15	27.5052	527.92	26.9118	486.323	92.1234	498.701	22.6138	-10.4513	-1.74837	537.15	27.5052
1SMST9_322	0.0565302	7.22654	0.677702	9.73388	0.0869139	6.53774	0.669946	0.0251197	6.81657	537.259	33.7011	525.385	39.9451	473.252	159.834	501.453	33.7896	-13.5251	-2.26022	537.259	33.7011
1SMST9_231	0.0567033	3.81571	0.680942	6.34553	0.0870041	5.06175	0.799007	0.0243707	7.57257	537.795	26.1174	527.344	26.1066	480.014	84.3149	486.679	36.4468	-12.0374	-1.98185	537.795	26.1174
1SMST9_386	0.0578719	6.34291	0.696652	9.13589	0.0872146	6.64985	0.719746	0.0260501	7.45101	539.043	34.3881	536.789	38.1072	524.916	139.077	519.789	38.272	-2.69131	-0.419838	539.043	34.3881
1SMST9_391	0.0599488	11.6075	0.723026	16.2331	0.0873719	11.3915	0.699076	0.0217398	10.0507	539.975	59.0074	552.452	69.2732	601.726	251.212	434.702	43.2705	10.2623	2.25833	539.975	59.0074
1SMST9_123	0.0576858	4.61893	0.700527	7.28792	0.0880069	5.72103	0.773598	0.026678	5.03954	543.739	29.8319	539.106	30.4934	517.848	101.399	532.155	26.4856	-4.99972	-0.859389	543.739	29.8319
1SMST9_150	0.0589604	3.48606	0.722939	5.25167	0.0888432	4.10476	0.748637	0.0242689	3.83877	548.692	21.5907	552.4	22.3784	565.632	75.9074	484.671	18.3925	2.99493	0.671304	548.692	21.5907
1SMST9_225	0.0578074	2.85098	0.712819	6.45151	0.0893343	5.85455	0.897119	0.0171151	15.909	551.599	30.9508	546.419	27.2686	522.468	62.5378	343.007	54.1813	-5.57552	-0.947951	551.599	30.9508
1SMST9_01	0.0614021	6.76425	0.761963	13.6162	0.0897728	10.22	0.877044	0.0240491	12.5712	554.193	54.2735	575.142	59.8586	653.351	145.138	480.334	59.7601	15.1768	3.64238	554.193	54.2735
1SMST9_201	0.0579296	3.93132	0.719693	6.67786	0.0899994	5.17771	0.809046	0.0242241	9.04961	555.534	27.5595	550.486	28.3842	527.099	86.1671	483.786	43.3073	-5.39453	-0.916945	555.534	27.5595
1SMST9_107	0.0578571	3.83702	0.718781	8.00463	0.0900387	7.07229	0.877644	0.0259842	4.82372	555.766	37.6591	549.947	34.0024	524.354	84.1398	518.492	24.7076	-5.9906	-1.05809	555.766	37.6591
1SMST9_211	0.0583961	6.82481	0.730486	9.87182	0.0906204	7.10804	0.722532	0.0267194	8.60188	559.205	38.0737	556.839	42.3373	544.656	149.138	532.969	45.2969	-2.67137	-0.425046	559.205	38.0737
1SMST9_71	0.0866632	5.34575	3.06958	7.24653	0.256667	5.21899	0.676542	0.109944	30.4924	1472.77	68.7181	1425.13	55.5549	1353.02	103.114	2108.34	619.899	-8.85077	-3.34274	1353.02	103.114
1SMST9_256	0.0981362	4.34479	3.09908	6.18476	0.228834	4.25142	0.712113	0.0318871	10.8558	1328.38	51.0373	1432.46	47.5134	1589.01	81.2024	634.447	67.9185	16.4018	7.26591	1589.01	81.2024
1SMST9_96	0.0998088	3.80636	3.76383	5.60142	0.273309	4.11515	0.733644	0.0662367	5.19338	1557.58	56.9423	1585.07	44.9661	1620.52	70.852	1296.32	65.3147	3.88429	1.73431	1620.52	70.852
1SMST9_204	0.0998532	5.77805	3.86038	8.6259	0.280066	6.39035	0.742499	0.0853669	10.739	1591.7	90.1362	1605.44	69.6747	1621.35	107.542	1655.75	171.448	1.82894	0.855995	1621.35	107.542
1SMST9_340	0.100272	9.62303	3.72084	13.0987	0.269009	8.90399	0.678444	0.0743994	12.3614	1535.77	121.691	1575.86	105.204	1629.13	178.927	1450.47	173.761	5.73067	2.54414	1629.13	178.927
1SMST9_220	0.100282	6.02145	3.13162	9.70536	0.226232	7.48896	0.784369	0.0121604	13.443	1314.72	89.0736	1440.49	74.83	1629.32	111.958	244.305	32.6706	19.3085	8.73106	1629.32	111.958
1SMST9_216	0.100366	10.7041	4.12942	15.6645	0.298061	11.424	0.730103	0.084673	9.91627	1681.69	169.14	1660.14	128.731	1630.88	198.984	1642.82	157.071	-3.11543	-1.29774	1630.88	198.984
1SMST9_46	0.100786	4.03201	3.28405	6.6013	0.236036	5.36951	0.79208	0.0482014	8.83969	1366.05	66.102	1477.28	51.4264	1638.63	74.8793	951.505	82.3285	16.6346	7.52907	1638.63	74.8793
1SMST9_398	0.100795	7.90108	4.08999	10.8686	0.293936	7.65998	0.686907	0.0883373	17.4424	1661.17	112.184	1652.31	88.9029	1638.79	146.73	1710.99	288.2	-1.36539	-0.536144	1638.79	146.73
1SMST9_198	0.100961	5.03451	4.25112	7.74074	0.30503	5.64453	0.760233	0.0842984	7.00087	1716.2	85.0536	1683.95	63.7137	1641.85	93.433	1635.84	110.312	-4.52827	-1.91505	1641.85	93.433
1SMST9_380	0.101175	6.44853	3.7674	9.12401	0.269805	6.53492	0.707502	0.0742331	11.3513	1539.81	89.5158	1585.83	73.3381	1645.77	119.616	1447.34	159.173	6.43827	2.90153	1645.77	119.616
1SMST9_95	0.101292	5.44328	3.2325	8.28524	0.23129	6.25004	0.753904	0.0127608	4.41987	1341.26	75.6863	1464.99	64.3365	1647.92	100.941	256.293	11.2594	18.6089	8.44577	1647.92	100.941
1SMST9_180	0.101384	2.96424	3.35779	5.30606	0.239937	4.98438	0.835839	0.00955845	8.53088	1386.37	62.1785	1494.61	41.5366	1649.61	54.9578	192.28	16.332	15.9578	7.2421	1649.61	54.9578
1SMST9_232	0.101547	4.91379	4.25855	7.82825	0.303832	6.08698	0.778456	0.0848562	7.60661	1710.28	91.4452	1685.39	64.4574	1652.59	91.0685	1646.23	120.618	-3.49065	-1.47694	1652.59	91.0685
1SMST9_303	0.101589	3.71214	3.47537	5.14339	0.248004	3.63725	0.692333	0.0590726	5.26154	1428.18	46.5953	1521.64	40.5773	1653.36	68.7914	1160.05	59.4054	13.6197	6.1424	1653.36	68.7914
1SMST9_205	0.102236	2.46006	3.87525	4.72949	0.274592	4.01652	0.854086	0.0726227	5.94634	1564.07	55.7823	1608.54	38.1902	1665.11	45.5209	1417.01	81.539	6.068	2.76459	1665.11	45.5209
1SMST9_337	0.102335	4.84137	4.13245	7.09572	0.292748	5.23843	0.731112	0.0764352	4.73379	1655.25	76.475	1660.74	58.0741	1666.9	89.5644	1488.73	68.0549	0.698947	0.330933	1666.9	89.5644
1SMST9_145	0.102416	6.04793	3.50593	8.83499	0.248044	6.72003	0.729631	0.0485556	11.9016	1428.38	86.1022	1528.55	69.9101	1668.36	111.865	958.334	111.703	14.3843	6.55332	1668.36	111.865
1SMST9_184	0.102531	6.87008	4.23626	10.3732	0.299316	8.1167	0.749949	0.0826578	7.55056	1687.92	120.549	1681.08	85.4131	1670.44	127.038	1605.23	116.853	-1.04631	-0.407009	1670.44	127.038
1SMST9_54	0.102682	10.0085	3.51037	14.2518	0.247678	10.5128	0.712368	0.0396835	12.513	1426.49	134.55	1529.55	113.092	1673.16	185.008	786.587	96.7666	14.7429	6.73801	1673.16	185.008
1SMST9_338	0.10282	3.14872	4.31405	4.42316	0.304169	3.19072	0.702562	0.0840384	5.07708	1711.95	47.9729	1696.05	36.4762	1675.64	58.1866	1630.99	79.7109	-2.16682	-0.937559	1675.64	58.1866
1SMST9_176	0.102911	3.26535	3.65528	6.03063	0.257322	5.71724	0.846799	0.0228358	9.29038	1476.12	75.4318	1561.66	48.1164	1677.28	60.3294	456.372	41.9672	11.9928	5.4773	1677.28	60.3294
1SMST9_17	0.102964	2.82075	3.89837	6.34579	0.274022	5.2661	0.898393	0.0774466	2.62969	1561.18	73.0186	1613.34	51.3235	1678.23	52.1088	1507.71	38.2416	6.97443	3.23308	1678.23	52.1088
1SMST9_309	0.103171	4.70524	3.60487	6.94752	0.25331	5.15871	0.73578	0.0515205	6.31296	1455.52	67.2153	1550.61	55.2791	1681.93	86.8815	1015.41	62.6155	13.4611	6.13216	1681.93	86.8815
1SMST9_60	0.103205	3.91062	3.94757	5.93774	0.277136	4.97684	0.756869	0.0848169	6.59008	1576.92	69.6216	1623.49	48.1409	1682.54	72.2034	1645.5	104.412	6.27726	2.86867	1682.54	72.2034
1SMST9_131	0.10327	5.13818	3.99686	7.60869	0.280462	5.88875	0.738396	0.02928	17.626	1593.69	83.1521	1633.56	61.8726	1683.71	94.8544	583.315	101.601	5.34648	2.44049	1683.71	94.8544
1SMST9_254	0.103425	4.29388	4.50431	5.96235	0.315583	3.97653	0.694344	0.086432	6.31253	1768.12	61.4937	1731.77	49.5813	1686.47	79.2405	1675.57	101.761	-4.84124	-2.09914	1686.47	79.2405
1SMST9_113	0.103429	9.25995	3.71905	14.0257	0.260598	10.4731	0.75109	0.0529133	5.1039	1492.9	139.591	1575.48	112.696	1686.55	170.884	1042.16	51.9094	11.4821	5.24128	1686.55	170.884
1SMST9_190	0.104285	5.64857	3.8899	7.84048	0.270219	5.29608	0.693762	0.0573799	4.60489	1541.91	72.632	1611.59	63.4125	1701.74	104.042	1127.72	50.5714	9.39187	4.32343	1701.74	104.042
1SMST9_87	0.104289	5.53187	4.09235	8.45241	0.284392	6.63747	0.756629	0.0804586	6.03483	1613.44	94.7484	1652.78	69.0771	1701.8	101.891	1564.13	91.0376	5.19207	2.37987	1701.8	101.891
1SMST9_342	0.104429	5.37595	4.04681	7.41085	0.280924	5.13098	0.688323	0.0857837	7.69855	1596.01	72.5441	1643.66	60.4096	1704.28	98.9888	1663.51	123.313	6.35283	2.89873	1704.28	98.9888
1SMST9_275	0.104569	5.12683	3.49484	8.20379	0.242228	6.23598	0.780955	0.032841	10.1559	1398.27	78.3912	1526.05	64.8556	1706.74	94.3727	653.122	65.3756	18.0739	8.37325	1706.74	94.3727
1SMST9_101	0.104723	6.84379	4.14274	10.529	0.286706	8.03509	0.759943	0.0815766	12.0442	1625.05	115.428	1662.78	86.3283	1709.46	125.935	1585.04	184.451	4.93772	2.26894	1709.46	125.935
1SMST9_108	0.104967	7.37624	3.68971	11.7062	0.254759	9.1265	0.776511	0.0432828	6.77694	1462.97	119.465	1569.14	93.7834	1713.73	135.661	856.438	56.9079	14.6326	6.76634	1713.73	135.661
1SMST9_18	0.105303	4.96406	4.07552	8.56067	0.280115	6.63795	0.815706	0.0893444	6.57618	1591.94	93.642	1649.42	69.9077	1719.62	91.2304	1729.68	109.311	7.42467	3.48449	1719.62	91.2304
1SMST9_177	0.105355	5.92192	4.18144	9.78542	0.287533	8.22594	0.79727	0.0576647	10.7935	1629.19	118.436	1670.39	80.3508	1720.52	108.822	1133.16	119.294	5.3081	2.46649	1720.52	108.822
1SMST9_83	0.105424	5.2443	4.07157	8.11082	0.279897	6.32586	0.763033	0.0704214	5.34298	1590.84	89.1842	1648.63	66.2109	1721.71	96.3556	1375.49	71.1724	7.60122	3.505	1721.71	96.3556
1SMST9_395	0.105493	5.71676	4.25449	8.48871	0.292149	6.50793	0.73972	0.0819293	9.0668	1652.26	94.8602	1684.6	69.8995	1722.92	105.02	1591.63	139.253	4.10131	1.92006	1722.92	105.02
1SMST9_30	0.105988	5.1102	3.77692	8.78539	0.258013	7.27766	0.81356	0.0675419	10.5007	1479.67	96.2276	1587.85	70.6448	1731.52	93.7777	1321.04	134.731	14.5452	6.81303	1731.52	93.7777
1SMST9_34	0.10604	2.83098	4.09999	6.4344	0.27998	5.93991	0.898352	0.0840393	8.6361	1591.26	83.762	1654.3	52.5702	1732.41	51.9459	1631.01	135.777	8.14735	3.81058	1732.41	51.9459
1SMST9_22	0.106773	4.82318	3.59596	8.51404	0.243793	7.07448	0.824092	0.0511713	8.5157	1406.39	89.3951	1548.64	67.7404	1745.04	88.3631	1008.69	83.9633	19.4067	9.18566	1745.04	88.3631
1SMST9_353	0.106809	7.04869	4.29548	10.1712	0.291509	7.38919	0.720951	0.0818064	8.61864	1649.06	107.525	1692.49	83.9644	1745.67	129.126	1589.33	132.163	5.53406	2.56606	1745.67	129.126
1SMST9_281	0.108276	3.02646	3.98183	4.88564	0.266553	3.74174	0.785267	0.0618957	7.35156	1523.28	50.7646	1630.5	39.6704	1770.61	55.2728	1213.86	86.797	13.9687	6.57576	1770.61	55.2728
1SMST9_133	0.108767	7.73022	4.56495	11.7356	0.304133	9.00858	0.752559	0.0666166	8.04478	1711.77	135.45	1742.89	98.0523	1778.87	141.036	1303.52	101.811	3.77217	1.7857	1778.87	141.036
1SMST9_333	0.185494	3.02435	12.8487	4.66469	0.502167	3.595	0.761399	0.144142	4.15003	2623.1	77.4762	2668.62	43.9718	2702.62	49.9154	2721.67	105.953	2.94202	1.70572	2702.62	49.9154
Rejected data
Analysis_name	bias_corr_samples_Pb207_Pb206	bias_corr_samples_Pb207_Pb206_err	bias_corr_samples_Pb207_U235	bias_corr_samples_Pb207_U235_err	bias_corr_samples_Pb206_U238	bias_corr_samples_Pb206_U238_err	rho	bias_corr_samples_Pb208_Th232	bias_corr_samples_Pb208_Th232_err	samples_Pb206_U238_age,	samples_Pb206_U238_age_err	samples_Pb207_U235_age	samples_Pb207_U235_age_err	samples_Pb207_Pb206_age	samples_Pb207_Pb206_age_err	samples_Pb208_Th232_age	samples_Pb208_Th232_age_err	discordance_Pb206U238_Pb207Pb206	discordance_Pb206U238_Pb207U235	best_age	best_age_err
1SMST9_27	-0.0634623	775.221	9.2861	787.88	-1.05933	140.684	0.178535	-2.95236	466.14	6.44641e-06	9.06905e-06	2366.65	65535	0.002008	18686.3	2.02122e-05	2.02122e-05	99.679	100	6.44641e-06	9.06905e-06
1SMST9_381	-1.10739	276.912	-63.4817	398.407	0.415353	286.442	0.718964	-10.2697	981.841	2239.35	7885.35	1.01538e-06	4.04536e-06	0.002008	6674.82	2.02122e-05	2.02122e-05	-1.11521e+08	-2.20542e+11	0.002008	6674.82
1SMST9_199	0.072941	20.4493	0.442705	35.1653	0.0439678	28.5607	0.813535	0.00363764	40.1282	277.381	77.5454	372.158	109.996	1012.31	414.578	73.3915	29.4187	72.5993	25.4669	277.381	77.5454
1SMST9_357	0.143764	33.6289	1.19799	36.2166	0.0603991	13.4576	0.371211	0.0221539	23.7655	378.052	49.4146	799.659	203.097	2273.04	579.36	442.892	104.38	83.368	52.7233	378.052	49.4146
1SMST9_148	0.0747096	5.1475	0.645143	6.99098	0.0625701	5.10452	0.678609	0.0105127	6.89575	391.237	19.3769	505.486	27.8438	1060.7	103.581	211.377	14.5053	63.1152	22.6018	391.237	19.3769
1SMST9_146	0.0629174	17.0373	0.571982	26.3602	0.0658724	20.2057	0.763069	0.00940124	29.8562	411.24	80.5032	459.296	97.6902	705.439	362.445	189.132	56.2826	41.7044	10.4629	411.24	80.5032
1SMST9_269	0.0634244	30.9685	0.578622	43.5961	0.066117	30.6749	0.703848	0.0102609	30.7029	412.719	122.649	463.575	163.656	722.492	656.986	206.339	63.1284	42.8755	10.9704	412.719	122.649
1SMST9_283	0.0663804	17.5745	0.621759	26.5302	0.0678926	19.8564	0.74912	0.00803376	22.1874	423.447	81.3837	490.949	103.636	818.393	367.161	161.731	35.7724	48.2587	13.7494	423.447	81.3837
1SMST9_394	0.0614842	16.081	0.679783	22.9941	0.0800923	16.4657	0.714777	0.0109352	16.9692	496.674	78.7134	526.643	94.7591	656.217	344.879	219.825	37.1344	24.3125	5.69062	496.674	78.7134
1SMST9_369	0.05886	17.7144	0.654875	25.9521	0.0806293	18.9858	0.73081	0.0219674	20.6505	499.878	91.3255	511.474	104.648	561.922	385.966	439.203	89.9192	11.0414	2.26722	499.878	91.3255
1SMST9_167	0.0576361	17.7993	0.654754	25.3785	0.082304	18.211	0.712831	0.0178823	18.0471	509.86	89.2795	511.4	102.307	515.956	390.873	358.247	64.1853	1.18141	0.301117	509.86	89.2795
1SMST9_111	0.0856901	7.7375	0.974712	9.69098	0.0824386	5.72363	0.602209	0.0336018	5.38817	510.662	28.1009	690.889	48.6073	1331.2	149.702	668.006	35.4361	61.639	26.0863	510.662	28.1009
1SMST9_109	0.0562993	27.6474	0.65183	38.4287	0.0839111	26.703	0.694548	0.0270126	34.7088	519.426	133.28	509.605	155.173	464.189	612.458	538.741	185.368	-11.8996	-1.92723	519.426	133.28
1SMST9_310	0.200469	22.5295	2.34526	24.0755	0.0848128	8.50204	0.352573	0.0281094	8.11963	524.786	42.8503	1226.12	173.038	2830.02	367.569	560.315	44.9206	81.4565	57.1994	524.786	42.8503
1SMST9_311	0.195719	10.8891	2.40514	12.8079	0.0890899	6.76031	0.52648	0.0302823	6.53643	550.152	35.6495	1244.13	92.1091	2790.83	178.276	602.988	38.8691	80.2871	55.7803	550.152	35.6495
1SMST9_371	0.188118	13.341	2.42349	14.7791	0.0933551	6.46168	0.43034	0.0314107	7.80938	575.349	35.5668	1249.59	106.621	2725.78	219.713	625.114	48.1276	78.8923	53.957	575.349	35.5668
1SMST9_62	0.0738888	18.9141	0.956486	29.2411	0.0937943	22.4077	0.762641	0.0341003	27.6756	577.938	123.882	681.474	146.154	1038.43	381.881	677.751	185.308	44.3451	15.193	577.938	123.882
1SMST9_43	0.224892	7.13307	3.09105	11.3582	0.0995591	8.91886	0.778237	0.0474253	9.82631	611.824	52.0594	1430.47	87.3536	3016.05	114.498	936.535	90.128	79.7144	57.2292	611.824	52.0594
1SMST9_147	0.094733	10.1407	1.38182	13.4581	0.105692	9.0534	0.657613	0.00645137	11.8529	647.678	55.7888	881.217	79.4402	1522.77	191.168	129.978	15.3626	57.4671	26.5018	647.678	55.7888
1SMST9_267	0.0936305	15.2991	1.50247	21.9279	0.116292	15.6892	0.716392	0.0275831	43.2545	709.184	105.373	931.39	134.46	1500.67	289.252	549.965	236.05	52.7422	23.8575	709.184	105.373
1SMST9_94	0.0939334	3.7001	1.65427	6.74993	0.127638	5.64959	0.836368	0.0101819	12.1102	774.376	41.224	991.188	42.7413	1506.78	69.8996	204.759	24.6866	48.6071	21.874	774.376	41.224
1SMST9_293	0.102816	6.22392	1.8666	17.3045	0.131603	16.1228	0.933081	0.0077466	31.8083	797.004	120.887	1069.33	114.901	1675.57	115.016	155.973	49.4818	52.4339	25.4667	797.004	120.887
1SMST9_383	0.347654	6.8092	6.3991	9.58503	0.133361	6.82267	0.703844	0.0723656	7.34749	807.011	51.7539	2032.15	84.3648	3696.75	103.833	1412.17	100.467	78.1697	60.2877	807.011	51.7539
1SMST9_326	0.101859	7.58135	1.98592	12.1519	0.141349	9.49047	0.781519	0.0173742	16.8346	852.283	75.7703	1110.73	82.2444	1658.27	140.406	348.156	58.1925	48.604	23.2685	852.283	75.7703
1SMST9_92	0.0995639	3.18958	2.11925	5.17374	0.154267	4.25184	0.788082	0.00661429	11.2599	924.836	36.6324	1155.09	35.7064	1615.95	59.4059	133.249	14.96	42.7682	19.9341	924.836	36.6324
1SMST9_08	0.0958736	10.7235	2.04491	21.8422	0.154325	18.0801	0.872326	0.0102579	34.3607	925.161	155.852	1130.6	150.027	1545.3	201.558	206.279	70.6416	40.1305	18.1708	925.161	155.852
1SMST9_206	0.426001	8.07732	9.26639	12.5792	0.157577	9.63375	0.766606	0.0714622	11.3206	943.298	84.5438	2364.7	115.785	4003.49	120.717	1395.13	153.188	76.4381	60.1092	943.298	84.5438
1SMST9_234	0.101355	7.32229	2.27721	10.9977	0.16278	8.20047	0.746126	0.00985344	16.9369	972.206	74.0081	1205.25	77.7456	1649.09	135.766	198.185	33.4301	41.0457	19.3358	972.206	74.0081
1SMST9_400	0.0874246	4.18724	3.32964	5.55327	0.275881	4.0351	0.660208	-0.304009	822.629	1570.59	56.2466	1488.03	43.3899	1369.87	80.5792	2.02122e-05	2.02122e-05	-14.6523	-5.54826	1369.87	80.5792
1SMST9_374	0.0884198	5.50479	3.51998	6.98185	0.288472	4.41415	0.61534	1.51988	128.382	1633.89	63.71	1531.71	55.2628	1391.62	105.618	18680.3	18680.3	-17.4089	-6.67052	1391.62	105.618
1SMST9_364	0.099208	5.93215	2.63737	9.44648	0.192668	7.30952	0.778246	0.0238151	17.8198	1135.81	76.1234	1311.13	69.6569	1609.28	110.581	475.714	83.9557	29.4209	13.3711	1609.28	110.581
1SMST9_79	0.0995784	3.9509	2.50894	6.81716	0.182591	5.78186	0.815585	0.0199162	8.89837	1081.11	57.5496	1274.63	49.5327	1616.22	73.583	398.594	35.1514	33.1085	15.1818	1616.22	73.583
1SMST9_207	0.100495	2.80076	2.77191	5.1404	0.199816	4.28902	0.838542	0.0193697	9.73978	1174.33	46.0468	1348	38.3752	1633.25	52.0491	387.761	37.4417	28.0988	12.8837	1633.25	52.0491
1SMST9_339	0.100751	5.92384	2.63661	10.1626	0.189716	8.28964	0.812548	0.0333678	10.1741	1119.84	85.2196	1310.91	74.9503	1637.98	110.022	663.43	66.5114	31.6332	14.5758	1637.98	110.022
1SMST9_194	0.101166	3.56287	2.89773	6.03252	0.207499	4.70945	0.807399	0.0264734	9.82962	1215.48	52.1707	1381.32	45.5687	1645.62	66.0901	528.126	51.3055	26.1387	12.0061	1645.62	66.0901
1SMST9_56	0.101336	7.94891	2.93788	12.9031	0.210044	10.5299	0.788203	0.0288483	13.9947	1229.05	117.842	1391.73	98.0489	1648.73	147.391	574.837	79.4697	25.4545	11.6886	1648.73	147.391
1SMST9_315	0.101463	19.7102	3.38618	31.1199	0.241952	24.0872	0.773857	0.0459222	31.4257	1396.84	302.725	1501.2	248.808	1651.06	365.365	907.508	280.825	15.3972	6.95205	1651.06	365.365
1SMST9_166	0.102931	25.8293	3.79319	37.5626	0.266992	27.353	0.726062	0.0272063	13.6185	1525.51	371.987	1591.3	311.226	1677.63	477.191	542.552	73.0364	9.06741	4.13435	1677.63	477.191
1SMST9_285	0.103736	16.9386	3.86333	25.0254	0.269948	18.4088	0.736113	0.0396976	10.1831	1540.54	252.383	1606.05	204.579	1692.02	312.374	786.859	78.7401	8.95254	4.07922	1692.02	312.374
1SMST9_116	0.105904	12.4335	3.25131	21.8202	0.222498	17.918	0.821773	0.0372129	29.4573	1295.06	210.3	1469.49	171.043	1730.06	228.209	738.498	214.752	25.1436	11.8701	1730.06	228.209
1SMST9_31	0.169142	4.33569	5.46767	7.78315	0.234064	6.60868	0.830676	0.111565	9.09963	1355.76	80.8077	1895.53	66.9064	2549.17	72.6224	2137.83	185.448	46.8155	28.4758	2549.17	72.6224
1SMST9_223	0.196284	8.3249	7.7083	12.1689	0.284507	8.77078	0.729428	2.04097	16.4262	1614.02	125.247	2197.57	109.798	2795.54	136.237	22479.6	2360.99	42.2646	26.5544	2795.54	136.237
1SMST9_224	0.233566	5.62024	8.82561	9.19809	0.27375	7.15305	0.791739	0.151178	8.12838	1559.81	99.1093	2320.14	84.0822	3076.65	89.7845	2845.6	216.917	49.3016	32.7709	3076.65	89.7845
1SMST9_165	0.261337	11.5071	9.31754	16.8243	0.25831	12.4511	0.729598	0.121014	12.9644	1481.19	164.806	2369.75	155.477	3254.78	181.205	2308.92	284.871	54.4919	37.4959	3254.78	181.205
1SMST9_186	0.268299	19.7087	10.8338	28.1264	0.292525	20.0267	0.713441	0.348533	22.8936	1654.14	292.382	2508.97	267.478	3296.11	309.281	6043.8	1232.78	49.8155	34.0711	3296.11	309.281
1SMST9_209	0.373393	15.5798	19.2317	22.0225	0.373119	15.5535	0.706766	1.59211	20.8943	2044.06	272.612	3053.51	215.75	3805.24	235.744	19251.6	2776.16	46.283	33.0588	3805.24	235.744
1SMST9_346	0.465734	7.7959	13.5652	10.5858	0.211142	7.19878	0.676504	0.138544	7.16523	1234.9	80.9057	2719.84	100.433	4136.25	115.634	2622.54	177.004	70.1445	54.5967	4136.25	115.634
1SMST9_33	0.509609	7.89391	13.0966	12.1425	0.186091	9.3285	0.759888	0.121769	12.5473	1100.17	94.3559	2686.64	115.036	4269.25	116.191	2322.52	277.187	74.2305	59.0505	4269.25	116.191
1SMST9_12	0.524293	8.5518	24.8904	14.0608	0.34355	9.90483	0.79945	0.241804	12.487	1903.72	163.303	3303.93	138.102	4311.01	125.545	4377.27	497.527	55.8404	42.38	4311.01	125.545
1SMST9_299	0.547901	13.4177	21.7295	23.2541	0.2875	19.0216	0.816741	0.695919	21.7155	1629.03	273.98	3171.71	229.563	4375.56	196.278	10676.6	1886.46	62.7699	48.6389	4375.56	196.278
1SMST9_347	0.548681	90.6616	68.7059	139.75	0.907732	106.354	0.761011	0.890068	74.6122	4163.83	3593.28	4309.58	65535	4377.64	1326.1	12867.4	8749.5	4.88406	3.38179	4377.64	1326.1
1SMST9_41	0.548759	7.28952	18.9147	11.2582	0.249663	8.66189	0.762114	0.150789	8.40233	1436.74	111.567	3037.48	108.991	4377.85	106.622	2838.76	223.763	67.1816	52.6996	4377.85	106.622
1SMST9_375	0.624636	7.00839	23.6532	11.6375	0.274391	9.34639	0.798341	0.327589	7.73126	1563.05	129.744	3254.21	113.847	4566.38	101.629	5727.43	389.32	65.7704	51.9683	4566.38	101.629
1SMST9_355	0.64262	55.78	32.451	86.0778	0.366023	65.5618	0.761624	0.147609	62.6671	2010.66	1144.32	3564.08	1223.11	4607.45	807.574	2782.84	1698.61	56.3607	43.5854	4607.45	807.574
1SMST9_298	0.659678	50.8021	80.7176	71.6534	0.887004	50.5417	0.705211	0.315611	81.7641	4093.41	1561.34	4471.01	896.271	4645.29	734.448	5544.24	4413.18	11.8804	8.44541	4645.29	734.448
1SMST9_321	0.685456	5.63163	56.9752	9.67829	0.602612	7.88484	0.813274	0.262215	7.16386	3040.35	191.182	4122.47	96.8695	4700.53	81.2516	4706.78	303.066	35.3189	26.2493	4700.53	81.2516
1SMST9_261	0.752611	75.302	43.5989	105.596	0.419802	74.0243	0.70105	0.170688	53.0351	2259.58	1434.14	3856.13	65535	4834.59	1081.46	3185.29	1626.67	53.2622	41.4029	4834.59	1081.46
Primary reference material
Analysis_name	bias_corr_pleis_Pb207_Pb206	bias_corr_pleis_Pb207_Pb206_err	bias_corr_pleis_Pb207_U235	bias_corr_pleis_Pb207_U235_err	bias_corr_pleis_Pb206_U238	bias_corr_pleis_Pb206_U238_err	rho	bias_corr_pleis_Pb208_Th232	bias_corr_pleis_Pb208_Th232_err	pleis_Pb206_U238_age,	pleis_Pb206_U238_age_err	pleis_Pb207_U235_age	pleis_Pb207_U235_age_err	pleis_Pb207_Pb206_age	pleis_Pb207_Pb206_age_err	pleis_Pb208_Th232_age	pleis_Pb208_Th232_age_err	discordance_Pb206U238_Pb207Pb206	discordance_Pb206U238_Pb207U235
Pleis 1	0.0522414	6.43418	0.443092	18.8089	0.0613465	14.3868	0.959638	0.0197675	14.512	383.809	53.6076	372.43	58.7052	295.991	146.82	395.648	56.9383	-29.6691	-3.05541
Pleis 2	0.0555102	5.97837	0.442299	18.4518	0.0576338	14.1185	0.967442	0.0150342	14.6397	361.219	49.5972	371.872	57.5166	432.831	133.164	301.614	43.875	16.5449	2.8646
Pleis 3	0.0523566	6.08953	0.393657	18.6189	0.0543858	14.2893	0.965538	0.0177149	14.9954	341.392	47.5141	337.037	53.4497	301.016	138.829	354.924	52.8266	-13.4134	-1.29213
Pleis 4	0.0528075	6.37796	0.383145	18.3543	0.0525008	13.8034	0.960594	0.0171655	14.2881	329.857	44.3868	329.35	51.67	320.533	144.894	344.01	48.7953	-2.90898	-0.153949
Pleis 5	0.0524479	3.72034	0.355708	10.5532	0.0490901	10.0098	0.935885	0.016943	14.931	308.933	30.1947	309.006	28.1225	304.988	84.7556	339.588	50.3431	-1.29341	0.0234824
Pleis 6	0.0527407	4.29027	0.360409	10.3288	0.0494793	9.70383	0.910127	0.0165746	15.1858	311.324	29.4927	312.52	27.7917	317.656	97.5169	332.264	50.1066	1.99335	0.382781
Pleis 7	0.0522047	4.09389	0.368556	9.70663	0.0511328	9.12851	0.907312	0.016545	13.93	321.472	28.6261	318.583	26.5484	294.387	93.4446	331.676	45.8775	-9.2005	-0.906989
Pleis 8	0.0524829	4.14242	0.407649	9.1633	0.0562691	8.53821	0.892834	0.0193789	11.9778	352.896	29.3213	347.181	26.9511	306.505	94.3456	387.943	46.0764	-15.1355	-1.64609
Pleis 9	0.0539967	4.01376	0.390474	6.3704	0.0523951	6.62512	0.80991	0.0178836	11.8288	329.21	21.263	334.715	18.1665	370.914	90.3867	358.272	42.0498	11.2436	1.64494
Pleis 10	0.0528953	3.88242	0.39182	6.32829	0.053677	6.19554	0.808	0.0172153	9.43421	337.057	20.346	335.698	18.0911	324.307	88.1409	344.999	32.2975	-3.93134	-0.404844
Pleis 11	0.0528755	3.76923	0.409039	6.55177	0.0560625	5.98776	0.822982	0.0176593	8.71563	351.635	20.4912	348.183	19.3145	323.456	85.5844	353.818	30.5923	-8.71179	-0.99157
Pleis 12	0.0535514	3.48789	0.393084	6.20198	0.0531989	5.69518	0.831427	0.016188	8.13103	334.131	18.5447	336.62	17.771	352.23	78.8066	324.576	26.1975	5.13845	0.739321
Pleis 13	0.0535165	3.75886	0.379562	10.6054	0.0514029	10.0354	0.935149	0.0161643	6.93955	323.129	31.6284	326.716	29.6362	350.758	84.9515	324.104	22.3244	7.87697	1.09786
Pleis 14	0.0530911	3.9914	0.391717	11.0648	0.0534733	10.0774	0.932934	0.0165876	7.13614	335.81	32.9748	335.623	31.6327	332.694	90.4992	332.523	23.5489	-0.936709	-0.0557521
Pleis 15	0.0539551	4.30551	0.395393	8.73822	0.0531091	7.86277	0.870675	0.0164707	7.17568	333.582	25.5618	338.301	25.1463	369.174	96.9869	330.197	23.5151	9.64109	1.395
Pleis 16	0.0534492	4.56912	0.423939	7.87523	0.0574773	7.35438	0.822113	0.0169094	6.57884	360.266	25.7687	358.864	23.8114	347.915	103.316	338.919	22.1231	-3.55001	-0.390526
Pleis 17	0.0544401	4.09102	0.403524	6.02474	0.0537101	5.46118	0.75049	0.0158272	6.71435	337.26	17.9449	344.201	17.5898	389.3	91.8265	317.398	21.1558	13.3676	2.01675
Pleis 18	0.0525987	4.13562	0.390266	7.61648	0.0537608	6.8406	0.841642	0.0161561	7.65595	337.57	22.4977	334.564	21.7127	311.526	94.1053	323.941	24.6181	-8.35992	-0.898496
Pleis 19	0.0528702	4.68276	0.391939	8.42037	0.0537107	7.41257	0.832476	0.0167426	7.84971	337.263	24.3573	335.785	24.0792	323.231	106.331	335.604	26.1433	-4.34135	-0.440159
Pleis 20	0.0541604	4.15148	0.38495	8.43975	0.0514935	8.16314	0.875475	0.0168893	7.85439	323.685	25.7706	330.674	23.8237	377.725	93.3751	338.519	26.3844	14.3069	2.11371
Pleis 21	0.0536481	4.00993	0.410494	7.89699	0.0554322	8.26978	0.877956	0.0166	7.67988	347.786	27.9993	349.231	23.3402	356.306	90.5358	332.769	25.363	2.39118	0.413649
Pleis 22	0.0524028	3.6396	0.386686	6.01829	0.0534565	4.13519	0.805105	0.0156587	7.84048	335.708	13.5269	331.946	17.0421	303.028	82.9456	314.045	24.4471	-10.7845	-1.13333
Pleis 23	0.0530612	3.45705	0.40065	7.46841	0.0546992	5.89122	0.892453	0.0164329	10.6109	343.308	19.696	342.12	21.695	331.413	78.4016	329.445	34.7035	-3.58923	-0.347251
Pleis 24	0.0526548	3.58646	0.390407	6.17612	0.0537125	4.90702	0.814361	0.0166858	10.9978	337.274	16.1247	334.667	17.6102	313.951	81.5737	334.474	36.5152	-7.42878	-0.779129
Pleis 25	0.0536009	3.8739	0.392249	9.993	0.0530151	8.81171	0.92271	0.0156636	11.3695	333.006	28.5987	336.011	28.5947	354.321	87.4956	314.142	35.4714	6.0156	0.894174
Pleis 26	0.053049	3.04214	0.400816	9.45082	0.0547395	8.94004	0.946777	0.0177264	13.1338	343.554	29.91	342.24	27.4644	330.895	68.9983	355.152	46.2904	-3.82571	-0.384007
Pleis 27	0.0535237	3.43907	0.388088	8.96398	0.0525347	8.03484	0.923887	0.0177301	6.61013	330.065	25.8528	332.972	25.4528	351.063	77.7198	355.225	23.2891	5.98123	0.873025
Pleis 28	0.0534594	3.73972	0.419292	8.52638	0.0568317	7.7545	0.898743	0.0174875	7.92146	356.329	26.8819	355.545	25.5818	348.344	84.5553	350.407	27.5368	-2.2921	-0.220439
Pleis 29	0.0535512	3.62368	0.407431	5.64694	0.055134	4.07676	0.768354	0.0185878	7.2952	345.965	13.7324	347.023	16.6	352.223	81.8748	372.251	26.9258	1.77666	0.305001
Pleis 30	0.0534722	3.89557	0.408372	5.82935	0.0553491	4.14069	0.744716	0.017453	7.77487	347.279	13.9993	347.702	17.1645	348.886	88.0705	349.721	26.9745	0.4607	0.121788
Pleis 31	0.0526551	3.64793	0.387781	5.41244	0.0533793	3.74954	0.740267	0.0171277	5.35567	335.236	12.2486	332.747	15.3576	313.965	82.9716	343.258	18.2368	-6.77464	-0.747803
Pleis 32	0.0528633	3.86548	0.393285	5.44604	0.0539288	3.55233	0.706509	0.0170623	6.76042	338.597	11.7177	336.766	15.6103	322.935	87.778	341.957	22.9363	-4.84978	-0.543687
Pleis 33	0.0569081	3.70906	0.410177	4.79003	0.0522508	3.32453	0.635486	0.0128991	6.90684	328.326	10.642	349.003	14.148	487.975	81.8454	259.053	17.786	32.7166	5.92457
Pleis 34	0.0538015	4.05913	0.388755	5.17337	0.0523843	3.34436	0.620518	0.0163455	7.49328	329.143	10.7314	333.459	14.7056	362.752	91.5415	327.708	24.3728	9.26488	1.29434
Pleis 35	0.0538447	4.16416	0.389322	5.17376	0.05242	3.23946	0.594315	0.0171804	7.80411	329.362	10.4016	333.874	14.7222	364.561	93.8799	344.306	26.66	9.65523	1.3515
Pleis 36	0.0527085	3.73995	0.378223	4.61753	0.0520226	2.96309	0.588879	0.0172477	7.86487	326.927	9.44561	325.73	12.8674	316.27	85.0294	345.643	26.9712	-3.3698	-0.367521
Pleis 37	0.0534815	3.4489	0.380981	4.40752	0.0516419	2.99324	0.624995	0.016834	8.3853	324.594	9.47533	327.76	12.347	349.279	77.9668	337.42	28.0783	7.06751	0.965967
Pleis 38	0.0524055	3.63904	0.37362	4.57721	0.0516794	3.35187	0.617358	0.0157683	8.72083	324.824	10.6179	322.333	12.642	303.144	82.9311	316.226	27.3815	-7.15166	-0.772818
Pleis 39	0.0527356	3.64551	0.380852	5.52438	0.0523434	3.70989	0.7561	0.0159741	9.60506	328.893	11.8956	327.665	15.4724	317.436	82.8649	320.32	30.5475	-3.60919	-0.374748
Pleis 40	0.0533202	3.96585	0.382501	5.85377	0.0519859	5.03071	0.744461	0.0169948	8.92211	326.703	16.0259	328.877	16.4464	342.447	89.7628	340.617	30.1581	4.59776	0.661162
Pleis 41	0.0527044	4.47209	0.386307	6.25194	0.053108	4.94907	0.704244	0.0162162	10.7336	333.575	16.089	331.668	17.6914	316.092	101.678	325.137	34.6494	-5.53115	-0.574882
Pleis 42	0.053942	4.69527	0.402801	6.01896	0.0540964	4.28215	0.630849	0.0164514	11.749	339.622	14.1667	343.678	17.5505	368.629	105.777	329.814	38.4719	7.86879	1.18012
Pleis 43	0.0526447	4.89571	0.399764	5.72964	0.0550052	4.2414	0.552437	0.0165273	10.5445	345.178	14.2553	341.477	16.6167	313.515	111.361	331.322	34.6812	-10.0993	-1.08375
Pleis 44	0.0528085	4.76954	0.410105	5.67303	0.0562522	4.30853	0.572738	0.0169351	10.5141	352.793	14.7918	348.951	16.7544	320.577	108.353	339.43	35.421	-10.0494	-1.10098
Pleis 45	0.0569358	4.49398	0.453758	5.07873	0.0577276	3.8375	0.521408	0.0157661	10.404	361.791	13.5013	379.908	16.0973	489.048	99.1471	316.181	32.6659	26.0214	4.76872
Pleis 46	0.0547384	4.51141	0.415598	4.93886	0.0549949	3.6288	0.480067	0.018224	9.93526	345.115	12.1942	352.899	14.7238	401.554	101.043	365.032	35.9734	14.055	2.20558
Secondary reference material
Analysis_name	bias_corr_fc5z_Pb207_Pb206	bias_corr_fc5z_Pb207_Pb206_err	bias_corr_fc5z_Pb207_U235	bias_corr_fc5z_Pb207_U235_err	bias_corr_fc5z_Pb206_U238	bias_corr_fc5z_Pb206_U238_err	rho	bias_corr_fc5z_Pb208_Th232	bias_corr_fc5z_Pb208_Th232_err	fc5z_Pb206_U238_age,	fc5z_Pb206_U238_age_err	fc5z_Pb207_U235_age	fc5z_Pb207_U235_age_err	fc5z_Pb207_Pb206_age	fc5z_Pb207_Pb206_age_err	fc5z_Pb208_Th232_age	fc5z_Pb208_Th232_age_err	discordance_Pb206U238_Pb207Pb206	discordance_Pb206U238_Pb207U235
FC5Z 1	0.0781454	29.3687	1.96625	42.3711	0.182248	30.5649	0.720814	0.0571922	30.7376	1079.24	303.96	1104.02	293.063	1150.57	583.124	1124.13	338.925	6.19956	2.24462
FC5Z 2	0.0762125	6.41851	1.94307	9.38823	0.184769	6.97676	0.729905	0.0495751	7.50189	1092.98	70.1431	1096.06	63.017	1100.66	128.387	977.976	71.7473	0.697893	0.281087
FC5Z 3	0.0757886	3.75156	1.9635	6.19504	0.187758	5.02547	0.795935	0.0543136	4.04076	1109.22	51.2123	1103.08	41.7008	1089.49	75.1659	1069.02	42.118	-1.81055	-0.555999
FC5Z 4	0.0779681	3.55181	1.91846	5.66399	0.178273	4.57256	0.779447	0.0514294	4.41179	1057.53	44.5989	1087.53	37.8226	1146.06	70.5692	1013.65	43.6646	7.72457	2.75833
FC5Z 5	0.0776909	3.07812	1.98215	4.94393	0.184825	3.55496	0.785338	0.0549591	5.97057	1093.28	35.749	1109.45	33.3784	1138.98	61.2215	1081.39	62.9666	4.01242	1.45802
FC5Z 6	0.0807809	4.27652	2.057	7.05122	0.184498	5.51264	0.795201	0.0576456	5.84858	1091.5	55.3536	1134.62	48.2124	1216.12	84.1044	1132.8	64.5333	10.2474	3.80076
FC5Z 7	0.075603	3.08366	1.95052	4.48332	0.187001	3.14355	0.726331	0.0581854	3.54082	1105.11	31.9252	1098.63	30.103	1084.58	61.8292	1143.11	39.3907	-1.89272	-0.589703
FC5Z 8	0.0771785	2.91919	1.89739	3.60278	0.178235	2.16217	0.586235	0.0564957	4.63689	1057.32	21.0848	1080.18	23.9606	1125.8	58.1736	1110.81	50.1797	6.08295	2.11567
FC5Z 9	0.0756665	4.86873	1.99828	6.67363	0.191407	4.46278	0.684103	0.059365	6.75876	1128.99	46.2198	1114.93	45.1922	1086.26	97.5965	1165.63	76.6991	-3.93393	-1.26123
FC5Z 10	0.0785277	4.35744	2.0611	5.76942	0.19012	4.15634	0.658351	0.0530431	6.96217	1122.02	42.8028	1135.98	39.4641	1160.26	86.3955	1044.65	71.0076	3.29521	1.22895
User-defined input parameters
pleis_Pb206_U238_known	0.0536372
pleis_Pb207_Pb206_known	0.053243
pleis_Pb207_U235_known	0.394138
pleis_Pb208_Th232_known	0.0168179
pleis_Pb206_U238_known_err	1
pleis_Pb207_Pb206_known_err	0.8
pleis_Pb207_U235_known_err	1.2
pleis_Pb208_Th232_known_err	1
fc5z_Pb206_U238_known	0.185154
fc5z_Pb207_Pb206_known	0.0762119
fc5z_Pb207_U235_known	1.94561
fc5z_Pb208_Th232_known	0.0557219
fc5z_Pb206_U238_known_err	0.75
fc5z_Pb207_Pb206_known_err	0.8
fc5z_Pb207_U235_known_err	1.25
fc5z_Pb208_Th232_known_err	1
reject_poly_order	3
reject_spline_breaks	5
outlier_cutoff_68	10
outlier_cutoff_76	10
outlier_cutoff_75	10
outlier_cutoff_82	25
replace_bad_rho	0.7
BL_xmin	0
BL_xmax	7
threshold_U238	5000
add_sec	5
int_time	14
filter_unc_cutoff	15
filter_transition_68_76	1000
filter_disc_transition	600
filter_disc_young	15
filter_disc_old	20
filter_disc_rev	10
poly_order	3

## Sheet: 2SMST112
Filtered data																							Smith, T.M., Saylor, J.E., Lapen, T.J., Hatfield, K., and Sundell, K.E., 2022, Identifying sources of non-unique detrital age distributions through integrated provenance analysis: An example from the Paleozoic Central Colorado Trough: Geosphere, v. 18, https://doi.org/10.1130/GES02541.1
Analysis_name	bias_corr_samples_Pb207_Pb206	bias_corr_samples_Pb207_Pb206_err	bias_corr_samples_Pb207_U235	bias_corr_samples_Pb207_U235_err	bias_corr_samples_Pb206_U238	bias_corr_samples_Pb206_U238_err	rho	bias_corr_samples_Pb208_Th232	bias_corr_samples_Pb208_Th232_err	samples_Pb206_U238_age,	samples_Pb206_U238_age_err	samples_Pb207_U235_age	samples_Pb207_U235_age_err	samples_Pb207_Pb206_age	samples_Pb207_Pb206_age_err	samples_Pb208_Th232_age	samples_Pb208_Th232_age_err	discordance_Pb206U238_Pb207Pb206	discordance_Pb206U238_Pb207U235	best_age	best_age_err
2SMST112-081	0.0664259	7.45741	0.328529	12.0585	0.0357786	10.3577	0.788947	0.00582279	14.1577	226.613	23.0643	288.442	30.2868	819.823	155.763	117.35	16.5727	72.3583	21.4354	226.613	23.0643
2SMST112-040	0.0679073	8.88384	0.369832	12.3386	0.0394392	8.48553	0.694	0.00362576	8.13103	249.356	20.7553	319.529	33.8373	865.727	184.231	73.1522	5.93815	71.1969	21.9614	249.356	20.7553
2SMST112-119	0.0647192	5.97984	0.383137	10.7818	0.0428358	7.78572	0.840478	0.003453	14.7224	270.387	20.6162	329.343	30.3347	765.221	125.989	69.6726	10.2424	64.6655	17.9014	270.387	20.6162
2SMST112-041	0.0654998	4.44577	0.389832	6.41092	0.0430964	4.47436	0.720851	0.00413073	6.12403	271.997	11.917	334.247	18.2605	790.432	93.2916	83.3194	5.09264	65.5888	18.6237	271.997	11.917
2SMST112-010	0.0687245	8.56196	0.440122	13.2863	0.0464543	10.2065	0.764681	0.00443382	13.1965	292.716	29.2081	370.338	41.2523	890.481	176.879	89.4192	11.7776	67.1283	20.9597	292.716	29.2081
2SMST112-178	0.059966	4.51065	0.396908	7.81967	0.0479724	7.38393	0.825458	0.00404503	20.6277	302.061	21.7896	339.404	22.5638	602.349	97.6103	81.5941	16.8041	49.8528	11.0023	302.061	21.7896
2SMST112-280	0.0664319	4.17793	0.44498	8.02083	0.0486076	6.36051	0.855944	0.0076565	6.04552	305.968	19.0065	373.758	25.0851	820.013	87.2619	154.166	9.28679	62.6875	18.1375	305.968	19.0065
2SMST112-315	0.0628357	4.3849	0.437667	6.6416	0.0505095	5.57691	0.755751	0.0124915	6.7714	317.649	17.2857	368.606	20.5328	702.674	93.3247	250.916	16.8926	54.7943	13.8242	317.649	17.2857
2SMST112-065	0.0711196	3.84981	0.524138	7.67603	0.0533262	7.68112	0.874314	0.0060498	7.84331	334.91	25.0682	427.912	26.8095	960.853	78.6673	121.912	9.53537	65.1445	21.7338	334.91	25.0682
2SMST112-180	0.0642567	4.76591	0.477297	6.80051	0.0538395	6.90793	0.75837	0.00558633	13.053	338.051	22.7507	396.217	22.3132	750.092	100.657	112.598	14.6619	54.9321	14.6804	338.051	22.7507
2SMST112-245	0.0601408	4.50398	0.47529	5.52432	0.0573554	5.31743	0.655441	0.0106882	14.1584	359.522	18.5941	394.837	18.0732	608.643	97.3629	214.886	30.2859	40.9306	8.94408	359.522	18.5941
2SMST112-062	0.0632087	4.778	0.504421	8.50034	0.0577459	7.72131	0.830709	0.0058653	15.8945	361.903	27.1739	414.691	28.9473	715.261	101.483	118.204	18.7418	49.4027	12.7295	361.903	27.1739
2SMST112-351	0.0618425	6.33686	0.494681	9.73392	0.0579506	7.12562	0.75957	0.014094	9.65607	363.15	25.1615	408.095	32.7224	668.667	135.624	282.883	27.1433	45.6905	11.0134	363.15	25.1615
2SMST112-246	0.0572549	4.23819	0.457866	4.04752	0.0580379	4.05745	0.453128	0.0145837	8.15192	363.682	14.3477	382.773	12.9081	501.366	93.305	292.64	23.6978	27.4617	4.98751	363.682	14.3477
2SMST112-030	0.0630782	3.81287	0.50972	6.97227	0.058553	6.046	0.83774	0.00948318	16.5396	366.82	21.5588	418.261	23.9067	710.867	81.0416	190.773	31.429	48.3982	12.2989	366.82	21.5588
2SMST112-297	0.0623684	7.73463	0.50504	11.833	0.058745	8.86049	0.756839	0.00848583	12.0929	367.988	31.6927	415.108	40.3394	686.764	165.047	170.794	20.5774	46.4171	11.3512	367.988	31.6927
2SMST112-174	0.0630023	8.06468	0.520404	10.4925	0.0598622	7.2133	0.641372	0.00630824	11.0003	374.787	26.2638	425.421	36.4818	708.31	171.484	127.103	13.9427	47.0871	11.902	374.787	26.2638
2SMST112-399	0.0631573	9.20373	0.525802	12.0155	0.060278	8.15906	0.643818	0.00986193	10.2789	377.316	29.902	429.02	42.0672	713.531	195.538	198.355	20.2991	47.1198	12.0516	377.316	29.902
2SMST112-363	0.0620845	4.22334	0.525701	10.6288	0.0613258	9.59786	0.917787	0.00627464	32.6462	383.683	35.7513	428.953	37.2031	677.02	90.265	126.428	41.1872	43.3276	10.5536	383.683	35.7513
2SMST112-118	0.0600544	12.1119	0.509209	16.9875	0.0613524	11.0456	0.703172	0.0101415	13.3944	383.845	41.1611	417.917	58.2617	605.536	261.961	203.95	27.1989	36.6108	8.15286	383.845	41.1611
2SMST112-219	0.0639197	10.1722	0.545031	11.7434	0.0618638	4.54706	0.516018	0.0142311	11.604	386.95	17.0773	441.736	42.0877	738.975	215.225	285.614	32.9365	47.6369	12.4023	386.95	17.0773
2SMST112-292	0.0672736	6.98354	0.585405	9.94214	0.0631326	6.90467	0.711979	0.0055106	6.82129	394.649	26.432	467.929	37.2925	846.257	145.262	111.076	7.55743	53.3654	15.6605	394.649	26.432
2SMST112-339	0.0585226	3.56084	0.529008	5.3773	0.0655077	3.68531	0.752315	0.0167127	9.19256	409.034	14.6059	431.151	18.8928	549.382	77.7503	335.01	30.5653	25.5465	5.12974	409.034	14.6059
2SMST112-055	0.0694531	8.32212	0.630266	10.5928	0.065678	8.00617	0.631125	0.0146897	11.9319	410.065	31.8083	496.261	41.6053	912.227	171.31	294.752	34.9446	55.048	17.3693	410.065	31.8083
2SMST112-295	0.0633852	3.1534	0.58003	6.09798	0.0663874	5.0552	0.856348	0.0077862	6.3717	414.354	20.2875	464.481	22.7339	721.18	66.9126	156.767	9.95253	42.545	10.792	414.354	20.2875
2SMST112-211	0.062025	7.66612	0.572463	10.9688	0.0669545	8.18252	0.715852	0.0102864	10.2113	417.781	33.1011	459.606	40.5683	674.971	163.903	206.849	21.0252	38.1038	9.10016	417.781	33.1011
2SMST112-169	0.0620799	4.54822	0.577028	6.19158	0.0673504	5.31387	0.697338	0.0113156	11.9887	420.173	21.6154	462.549	23.0072	676.862	97.2111	227.429	27.1312	37.9235	9.16158	420.173	21.6154
2SMST112-052	0.0845177	14.1532	0.794688	18.8631	0.0680579	12.9147	0.661492	0.0117493	19.7119	424.445	53.0511	593.828	85.0087	1304.5	274.857	236.095	46.3211	67.4629	28.5239	424.445	53.0511
2SMST112-112	0.0587185	10.8575	0.554979	18.4119	0.0683829	14.1757	0.808545	0.00759861	28.993	426.406	58.4917	448.253	66.82	556.673	236.777	153.004	44.2414	23.401	4.87383	426.406	58.4917
2SMST112-104	0.0684609	14.2924	0.647994	16.2213	0.0684751	7.1186	0.474279	0.0172842	16.7744	426.962	29.4093	507.244	64.8517	882.538	295.623	346.367	57.6881	51.6211	15.827	426.962	29.4093
2SMST112-046	0.0728935	10.8738	0.689805	15.8708	0.0685137	11.5017	0.728416	0.0172408	9.75336	427.195	47.5429	532.683	65.8759	1010.99	220.492	345.505	33.4396	57.745	19.8032	427.195	47.5429
2SMST112-113	0.0733657	9.90938	0.694916	13.4973	0.0685314	7.98859	0.685366	0.0116599	20.3001	427.302	33.0289	535.75	56.2476	1024.07	200.552	234.309	47.3457	58.2742	20.2423	427.302	33.0289
2SMST112-319	0.0604336	8.3308	0.575782	12.2235	0.0690807	9.28605	0.732295	0.0106975	17.2482	430.615	38.6813	461.747	45.3813	619.134	179.772	215.073	36.9333	30.4488	6.74222	430.615	38.6813
2SMST112-141	0.0651141	7.8054	0.629665	9.39352	0.0700106	4.86245	0.557819	0.0134367	20.0006	436.219	20.5093	495.887	36.8689	778.024	164.115	269.777	53.6697	43.9324	12.0325	436.219	20.5093
2SMST112-170	0.0598698	7.9405	0.579229	11.0807	0.0701045	8.16756	0.698544	0.0173177	20.5963	436.785	34.4933	463.966	41.2897	598.871	171.933	347.034	70.9904	27.0651	5.85822	436.785	34.4933
2SMST112-233	0.0728992	11.5951	0.709	13.3496	0.0705772	6.13936	0.496947	0.0214296	7.79744	439.632	26.091	544.152	56.292	1011.15	235.113	428.564	33.0923	56.5217	19.2079	439.632	26.091
2SMST112-259	0.0578474	4.91945	0.567224	5.52422	0.0711653	5.35804	0.591652	0.0149085	11.1221	443.173	22.9476	456.218	20.304	523.988	107.883	299.109	33.0492	15.4232	2.85946	443.173	22.9476
2SMST112-047	0.0600118	7.01179	0.594348	10.2974	0.0717022	7.45101	0.732402	0.0114382	12.5521	446.402	32.1362	473.641	38.9967	604	151.693	229.879	28.7116	26.0924	5.7508	446.402	32.1362
2SMST112-273	0.0579704	10.4319	0.573274	15.8942	0.0717664	11.7818	0.754586	0.0169447	10.7968	446.789	50.8579	460.13	58.8725	528.644	228.588	339.622	36.3946	15.484	2.89944	446.789	50.8579
2SMST112-212	0.058463	4.34634	0.578871	7.06769	0.0718302	6.03902	0.7911	0.0187893	8.92479	447.173	26.0897	463.736	26.3172	547.156	94.9374	376.25	33.2963	18.2732	3.57172	447.173	26.0897
2SMST112-210	0.0597617	9.59676	0.592937	11.1548	0.0719697	6.14325	0.511267	0.0176901	10.594	448.011	26.588	472.742	42.1843	594.957	207.932	354.431	37.2553	24.6985	5.23126	448.011	26.588
2SMST112-192	0.0613586	6.68779	0.610803	9.47303	0.0721827	8.05991	0.720179	0.0120524	15.3031	449.292	34.9798	484.066	36.4892	651.83	143.533	242.149	36.8689	31.0722	7.18376	449.292	34.9798
2SMST112-324	0.0584692	3.25867	0.584526	4.59017	0.0724766	3.7273	0.711427	0.0167635	5.52926	451.059	16.2376	467.366	17.1951	547.387	71.1765	336.018	18.4342	17.5978	3.48915	451.059	16.2376
2SMST112-267	0.0607715	4.76053	0.610704	7.97341	0.0729321	6.33135	0.802246	0.0121867	8.92334	453.796	27.7436	484.004	30.7059	631.155	102.522	244.831	21.727	28.1007	6.24116	453.796	27.7436
2SMST112-309	0.0722485	7.39612	0.726947	9.01182	0.072975	5.55974	0.573026	0.02029	7.89916	454.054	24.3758	554.76	38.5367	992.948	150.374	406.002	31.7757	54.2721	18.153	454.054	24.3758
2SMST112-244	0.0699648	9.05873	0.703925	9.32825	0.0730178	4.79567	0.31244	0.0200911	8.49284	454.311	21.0373	541.132	39.149	927.321	186.045	402.061	33.8374	51.0082	16.0444	454.311	21.0373
2SMST112-252	0.139934	58.226	1.41689	59.0965	0.0734867	10.9218	0.171518	0.0185392	7.99526	457.128	48.1985	896.056	366.963	2226.39	1008.32	371.287	29.4358	79.4678	48.9845	457.128	48.1985
2SMST112-136	0.0635764	5.04612	0.648817	7.16733	0.073875	4.50524	0.715448	0.0175631	18.5742	459.459	19.9794	507.75	28.6452	727.569	106.964	351.907	64.9022	36.8502	9.51087	459.459	19.9794
2SMST112-093	0.0568825	4.2452	0.581054	7.45922	0.0738946	6.36758	0.822831	0.0165269	13.0268	459.577	28.2453	465.139	27.8421	486.98	93.692	331.316	42.8534	5.62722	1.19573	459.577	28.2453
2SMST112-334	0.0592003	6.50492	0.606966	9.34836	0.0743089	6.51334	0.718532	0.0150377	14.1808	462.064	29.0427	481.645	35.8677	574.472	141.43	301.684	42.508	19.5672	4.06545	462.064	29.0427
2SMST112-069	0.0574852	3.48272	0.5905	7.14516	0.0743231	7.33643	0.884655	0.0194393	6.8373	462.149	32.7187	471.187	26.942	510.196	76.5566	389.141	26.3695	9.41746	1.91823	462.149	32.7187
2SMST112-053	0.0616813	7.2688	0.634719	9.70798	0.0744814	7.25904	0.667676	0.0174021	17.5391	463.098	32.4377	499.031	38.2915	663.077	155.713	348.71	60.7269	30.1592	7.20047	463.098	32.4377
2SMST112-387	0.0612982	6.21825	0.630885	8.40496	0.0745166	6.20171	0.675662	0.0176739	11.8432	463.31	27.7251	496.647	33.0252	649.713	133.503	354.109	41.6153	28.6901	6.71253	463.31	27.7251
2SMST112-272	0.0586028	5.73876	0.602178	9.02788	0.0745717	6.60145	0.773094	0.0130138	9.68913	463.64	29.5324	478.615	34.4664	552.371	125.241	261.342	25.1744	16.0635	3.12871	463.64	29.5324
2SMST112-215	0.0587121	4.56137	0.6039	7.35809	0.0746214	4.42476	0.812615	0.0194525	10.9616	463.938	19.8069	479.706	28.1381	556.436	99.4771	389.404	42.3205	16.6233	3.28696	463.938	19.8069
2SMST112-242	0.0578297	4.04301	0.596923	4.4476	0.0749109	3.77417	0.526615	0.0172502	7.72108	465.675	16.9556	475.279	16.8822	523.317	88.6727	345.691	26.4815	11.0149	2.02082	465.675	16.9556
2SMST112-214	0.0563121	5.99625	0.581624	9.25103	0.0749307	5.98912	0.771548	0.020648	13.3529	465.793	26.9131	465.505	34.5563	464.694	132.82	413.092	54.674	-0.236569	-0.0620026	465.793	26.9131
2SMST112-099	0.0577006	5.37015	0.598486	7.16092	0.0750335	5.34273	0.666317	0.0146024	9.61246	466.41	24.039	476.272	27.23	518.411	117.879	293.013	27.982	10.0308	2.07075	466.41	24.039
2SMST112-257	0.0612214	14.1972	0.63324	18.9198	0.0750694	13.3714	0.66248	0.0155459	12.469	466.625	60.1911	498.112	74.6185	647.022	304.943	311.8	38.6169	27.8811	6.32132	466.625	60.1911
2SMST112-142	0.0636616	3.78131	0.660613	6.0417	0.075129	4.30503	0.783114	0.017418	16.9408	466.982	19.3929	514.989	24.4091	730.406	80.1162	349.026	58.7052	36.0654	9.32193	466.982	19.3929
2SMST112-045	0.0595713	4.50691	0.619629	6.17137	0.0753095	4.0522	0.683668	0.0215796	5.90678	468.064	18.2947	489.615	23.9777	588.037	97.7647	431.532	25.2352	20.4022	4.40153	468.064	18.2947
2SMST112-395	0.0596286	7.02765	0.621719	7.48091	0.0754899	3.67195	0.36512	0.0220018	14.7538	469.146	16.6149	490.924	29.1288	590.123	152.391	439.884	64.3006	20.5003	4.43623	469.146	16.6149
2SMST112-194	0.0605447	4.93269	0.63032	5.27613	0.0754935	5.10248	0.548661	0.013216	7.0636	469.167	23.0889	496.295	20.7154	623.098	106.373	265.375	18.6311	24.704	5.46606	469.167	23.0889
2SMST112-173	0.0583317	6.32202	0.60824	8.151	0.0755666	5.78354	0.635534	0.0158276	10.5355	469.606	26.1943	482.45	31.3114	542.243	138.208	317.406	33.2064	13.3957	2.66226	469.606	26.1943
2SMST112-043	0.0606193	5.7602	0.633944	6.80972	0.0757214	3.44635	0.53411	0.0321015	44.8995	470.533	15.6386	498.55	26.8333	625.753	124.163	638.647	284.256	24.8053	5.61952	470.533	15.6386
2SMST112-110	0.0566061	6.52893	0.592785	9.21188	0.0757637	4.69776	0.742929	0.0211431	10.1049	470.787	21.3282	472.645	34.8248	476.221	144.33	422.895	42.3334	1.14108	0.393153	470.787	21.3282
2SMST112-206	0.0581778	4.76237	0.607889	7.00089	0.0757881	6.47996	0.753019	0.020418	7.31925	470.933	29.4285	482.228	26.8814	536.465	104.215	408.536	29.6233	12.2154	2.34209	470.933	29.4285
2SMST112-312	0.0598858	4.67683	0.627411	6.85717	0.0759784	5.37783	0.733107	0.0153153	10.3198	472.074	24.4801	494.482	26.8492	599.452	101.256	307.209	31.4881	21.2491	4.53172	472.074	24.4801
2SMST112-060	0.0608416	4.60842	0.639159	7.34082	0.0760241	6.5454	0.785583	0.0211799	7.53704	472.347	29.8117	501.785	29.0724	633.641	99.2052	423.622	31.621	25.4551	5.86668	472.347	29.8117
2SMST112-362	0.0629531	3.19453	0.661164	5.37634	0.0760654	3.96029	0.807442	0.0192687	7.63566	472.594	18.0466	515.326	21.731	706.647	67.9457	385.758	29.1969	33.1216	8.29214	472.594	18.0466
2SMST112-337	0.0579049	3.71257	0.608765	5.49475	0.0761915	3.70876	0.740086	0.0180004	9.42676	473.35	16.9264	482.781	21.1153	526.167	81.3856	360.593	33.7189	10.038	1.9534	473.35	16.9264
2SMST112-184	0.071218	5.67382	0.74884	5.7778	0.0762283	4.52123	0.414049	0.0191282	8.56151	473.57	20.6437	567.551	25.1258	963.678	115.89	382.973	32.5057	50.858	16.559	473.57	20.6437
2SMST112-221	0.0559481	5.32657	0.588412	7.9314	0.0763085	4.73344	0.758337	0.0199843	8.99293	474.051	21.6338	469.853	29.8417	450.308	118.283	399.943	35.6445	-5.27241	-0.893417	474.051	21.6338
2SMST112-101	0.0597569	4.43925	0.630681	6.92578	0.07635	5.86208	0.771235	0.0133054	14.0966	474.299	26.8057	496.52	27.2046	594.785	96.1875	267.158	37.4472	20.257	4.47529	474.299	26.8057
2SMST112-213	0.0647134	7.39653	0.681434	9.24774	0.0763909	6.01833	0.602203	0.0224723	16.6615	474.545	27.5339	527.641	38.0726	765.033	155.842	449.187	74.1518	37.9707	10.0629	474.545	27.5339
2SMST112-321	0.0647484	3.96031	0.682866	5.27324	0.0764637	3.94526	0.665441	0.0237828	9.28469	474.98	18.0655	528.505	21.73	766.17	83.4268	475.075	43.642	38.0059	10.1276	474.98	18.0655
2SMST112-247	0.0653326	4.48092	0.689147	4.92883	0.0765543	4.71779	0.569219	0.0161081	8.08912	475.523	21.6268	532.288	20.421	785.064	94.1094	322.987	25.9358	39.4288	10.6643	475.523	21.6268
2SMST112-384	0.0586478	9.5373	0.620521	13.4592	0.076606	9.8468	0.706064	0.0170567	10.7218	475.832	45.1675	490.174	52.3764	554.046	208.08	341.846	36.3764	14.1169	2.92581	475.832	45.1675
2SMST112-222	0.0578286	6.00105	0.61169	8.21378	0.0767486	4.39594	0.703154	0.0210102	8.49253	476.686	20.1989	484.625	31.6638	523.275	131.618	420.264	35.3535	8.90328	1.63819	476.686	20.1989
2SMST112-004	0.0560142	27.3542	0.592595	28.0338	0.0767659	6.2855	0.218929	0.0185642	29.5038	476.79	28.8874	472.523	106.304	452.93	607.153	371.783	108.981	-5.26791	-0.902918	476.79	28.8874
2SMST112-275	0.0586682	3.36366	0.62169	6.64662	0.0769007	5.02736	0.869936	0.0194051	4.17097	477.597	23.1427	490.906	25.878	554.806	73.3769	388.464	16.0544	13.9164	2.71126	477.597	23.1427
2SMST112-254	0.0575611	4.61966	0.61047	5.03054	0.0769718	5.13398	0.587044	0.0201241	4.52775	478.022	23.6538	483.856	19.3646	513.098	101.498	402.714	18.0615	6.83604	1.20576	478.022	23.6538
2SMST112-064	0.0590344	5.66042	0.628551	9.14631	0.0770416	8.1556	0.791813	0.0194919	8.83906	478.44	37.6073	495.193	35.8588	568.366	123.196	390.184	34.1867	15.8218	3.38299	478.44	37.6073
2SMST112-031	0.05852	4.35426	0.622429	5.32888	0.0770587	3.4521	0.580413	0.0230735	5.52562	478.543	15.9215	491.369	20.7611	549.286	95.076	461.069	25.2042	12.8792	2.61022	478.543	15.9215
2SMST112-050	0.0581829	4.73729	0.619522	6.50122	0.0770816	5.57747	0.702311	0.0225083	6.15798	478.679	25.7312	489.548	25.2571	536.657	103.663	449.898	27.4172	10.8034	2.22009	478.679	25.7312
2SMST112-070	0.0571306	5.35029	0.608935	7.65825	0.0771157	7.44746	0.749439	0.0213505	7.01322	478.883	34.3725	482.888	29.4383	496.578	117.886	426.998	29.654	3.56329	0.829394	478.883	34.3725
2SMST112-032	0.0570119	4.80752	0.606884	6.28023	0.0771189	4.33689	0.645044	0.0238962	5.91672	478.903	20.0168	481.593	24.0884	491.995	106.01	477.315	27.9298	2.66113	0.558586	478.903	20.0168
2SMST112-203	0.0559945	6.26416	0.595597	8.90791	0.0771469	7.27504	0.717821	0.0207095	6.63365	479.07	33.5893	474.435	33.775	452.15	139.058	414.31	27.2224	-5.95377	-0.976927	479.07	33.5893
2SMST112-281	0.0606787	3.4328	0.645593	6.47225	0.0772066	4.86656	0.853863	0.0205991	3.98179	479.428	22.4852	505.763	25.7878	627.865	73.969	412.123	16.2502	23.6417	5.20711	479.428	22.4852
2SMST112-226	0.0577206	5.64187	0.614255	8.97172	0.0772187	5.74108	0.792324	0.0188113	10.7422	479.5	26.5297	486.24	34.6778	519.171	123.827	376.686	40.1296	7.64122	1.38626	479.5	26.5297
2SMST112-175	0.0575377	3.73286	0.613554	3.99783	0.0772821	3.97109	0.56117	0.0208542	12.1527	479.879	18.3645	485.799	15.4368	512.204	82.0267	417.176	50.2407	6.31088	1.21864	479.879	18.3645
2SMST112-383	0.0685861	8.03216	0.732955	9.00809	0.0773753	4.8373	0.459319	0.021739	10.1704	480.437	22.3953	558.286	38.7046	886.318	166.04	434.686	43.7845	45.7941	13.9443	480.437	22.3953
2SMST112-378	0.0581667	5.06291	0.621798	6.44176	0.0774038	4.75736	0.628074	0.0219882	6.86765	480.608	22.0328	490.974	25.0827	536.048	110.8	439.615	29.8873	10.3423	2.11129	480.608	22.0328
2SMST112-205	0.0587655	4.88836	0.627541	7.18412	0.0774545	6.58582	0.751252	0.0213084	10.6628	480.911	30.5196	494.563	28.1335	558.42	106.572	426.165	45.0157	13.88	2.76037	480.911	30.5196
2SMST112-335	0.0590773	4.50141	0.631776	6.07347	0.0775057	3.73766	0.673869	0.0209122	9.86891	481.217	17.3314	497.201	23.8808	569.947	97.9445	418.324	40.901	15.568	3.21478	481.217	17.3314
2SMST112-074	0.0564382	4.614	0.606303	5.3677	0.0777192	6.07619	0.681329	0.0204421	7.65388	482.494	28.2472	481.226	20.575	469.647	102.115	409.013	31.0145	-2.73541	-0.263609	482.494	28.2472
2SMST112-369	0.059938	6.6113	0.643285	10.3968	0.0777224	7.90977	0.771854	0.0183497	9.59911	482.514	36.7728	504.338	41.3486	601.337	143.092	367.528	34.9908	19.7599	4.32732	482.514	36.7728
2SMST112-181	0.0658914	19.1078	0.707943	19.4222	0.0778856	6.02494	0.206863	0.0198478	12.1035	483.49	28.0646	543.524	81.9209	802.928	400.172	397.238	47.6665	39.7841	11.0453	483.49	28.0646
2SMST112-189	0.0602909	7.06412	0.648463	7.47231	0.0779821	5.01841	0.414917	0.0210749	5.86533	484.067	23.4029	507.532	29.8549	614.03	152.568	421.545	24.4837	21.1655	4.62339	484.067	23.4029
2SMST112-327	0.0584148	6.86887	0.629131	10.3111	0.0780745	8.01764	0.746457	0.0170409	13.2076	484.619	37.4309	495.554	40.453	545.356	150.083	341.532	44.7788	11.1371	2.20664	484.619	37.4309
2SMST112-216	0.0582323	4.34379	0.626916	7.2233	0.0781048	4.42162	0.827497	0.0214214	10.5039	484.8	20.6499	494.173	28.2698	538.514	95.0218	428.402	44.5744	9.97444	1.89662	484.8	20.6499
2SMST112-284	0.0567846	10.9483	0.611721	16.2293	0.0781702	11.8084	0.73826	0.0182668	10.0678	485.191	55.1916	484.645	62.6243	483.176	241.789	365.88	36.5376	-0.417132	-0.112735	485.191	55.1916
2SMST112-146	0.0646169	15.1463	0.697629	16.4827	0.0781718	6.21276	0.394848	0.0149337	21.4666	485.201	29.0381	537.374	68.882	761.887	319.287	299.611	63.943	36.3158	9.70881	485.201	29.0381
2SMST112-200	0.0574603	4.31398	0.619413	6.18272	0.0781791	5.6948	0.739098	0.0209104	11.8134	485.245	26.6194	489.479	24.0167	509.243	94.8447	418.287	48.9654	4.71243	0.865084	485.245	26.6194
2SMST112-207	0.0610883	6.44031	0.658737	8.45056	0.0782161	6.75219	0.661818	0.0236279	11.7585	485.466	31.576	513.841	34.0889	642.345	138.44	472.018	54.9336	24.4228	5.52221	485.466	31.576
2SMST112-100	0.0732971	16.5935	0.792772	17.3277	0.078243	5.56846	0.289728	0.0208624	10.5217	485.627	26.0486	592.743	77.9554	1022.18	335.922	417.337	43.5075	52.491	18.0713	485.627	26.0486
2SMST112-306	0.0577729	8.13489	0.623528	11.7505	0.0782812	8.73487	0.721926	0.0250079	9.09456	485.855	40.8795	492.056	45.854	521.159	178.483	499.249	44.8982	6.77413	1.26029	485.855	40.8795
2SMST112-105	0.0574885	5.81025	0.622768	7.60497	0.0783703	3.98656	0.659173	0.0213185	12.1091	486.388	18.6768	491.581	29.6429	510.323	127.717	426.365	51.153	4.69013	1.05627	486.388	18.6768
2SMST112-225	0.0586559	5.97963	0.634	9.31231	0.078429	5.9382	0.779638	0.0206464	10.9627	486.739	27.8394	498.584	36.704	554.347	130.454	413.06	44.8727	12.196	2.37589	486.739	27.8394
2SMST112-376	0.0587676	4.20106	0.636688	5.82188	0.0784488	4.79737	0.702838	0.0213368	5.88922	486.857	22.4962	500.254	23	558.496	91.5871	426.727	24.8828	12.8271	2.67793	486.857	22.4962
2SMST112-059	0.0620797	8.02379	0.672969	11.7158	0.0784508	9.6968	0.734588	0.0196398	10.0576	486.869	45.4727	522.516	47.8885	676.855	171.496	393.116	39.1941	28.0689	6.82211	486.869	45.4727
2SMST112-379	0.058864	5.53778	0.637991	7.59492	0.078478	5.81251	0.688644	0.0210968	6.91669	487.032	27.266	501.062	30.0457	562.069	120.656	421.978	28.905	13.3502	2.80002	487.032	27.266
2SMST112-343	0.0633147	4.10069	0.685876	5.46816	0.0784958	3.15127	0.667829	0.0229682	8.40701	487.138	14.7854	530.32	22.5924	718.82	87.0466	458.987	38.1883	32.2308	8.14258	487.138	14.7854
2SMST112-255	0.0600612	8.92588	0.650089	11.1418	0.0785554	8.17689	0.610998	0.023926	20.4294	487.494	38.3924	508.533	44.5996	605.78	193.044	477.902	96.7186	19.5262	4.13722	487.494	38.3924
2SMST112-151	0.0567737	11.2655	0.616345	16.0289	0.0786191	11.3879	0.711367	0.0155941	17.5402	487.875	53.5095	487.554	62.1392	482.753	248.812	312.76	54.5098	-1.06115	-0.0659845	487.875	53.5095
2SMST112-234	0.0589632	7.42497	0.63884	11.1041	0.0786241	7.88017	0.74437	0.0168342	12.5824	487.905	37.0292	501.588	43.9785	565.736	161.672	337.425	42.1477	13.7576	2.72792	487.905	37.0292
2SMST112-396	0.0579643	6.63695	0.629726	7.33093	0.0786577	4.07437	0.440156	0.0220234	7.12795	488.106	19.1531	495.925	28.7701	528.415	145.437	440.31	31.0696	7.62824	1.57666	488.106	19.1531
2SMST112-279	0.0583109	7.11811	0.632124	11.869	0.0786677	9.08942	0.800982	0.0152734	14.8424	488.166	42.7336	497.418	46.709	541.464	155.633	306.377	45.1813	9.84338	1.86007	488.166	42.7336
2SMST112-179	0.069053	11.0602	0.74996	11.774	0.0787175	5.47905	0.359005	0.0218047	13.0158	488.463	25.7745	568.201	51.2781	900.322	228.143	435.986	56.2176	45.7458	14.0334	488.463	25.7745
2SMST112-329	0.058884	3.8764	0.640158	5.65371	0.0788065	4.6992	0.734353	0.0150912	6.89383	488.995	22.129	502.404	22.4097	562.809	84.4472	302.748	20.7261	13.1153	2.66897	488.995	22.129
2SMST112-087	0.0599948	10.5303	0.653831	13.6089	0.0788368	9.06647	0.634261	0.0164197	29.3472	489.176	42.7106	510.834	54.6822	603.387	227.835	329.184	96.0519	18.9284	4.23972	489.176	42.7106
2SMST112-263	0.0584882	4.91995	0.635801	6.37693	0.0788945	5.51997	0.666601	0.0219884	4.69281	489.521	26.0211	499.703	25.1722	548.096	107.45	439.619	20.418	10.6871	2.03762	489.521	26.0211
2SMST112-073	0.0586597	11.624	0.639832	17.3147	0.0789116	13.7886	0.743066	0.0221633	14.7383	489.623	65.0139	502.202	68.7028	554.491	253.587	443.077	64.6948	11.6986	2.5048	489.623	65.0139
2SMST112-168	0.0569209	5.87624	0.620069	7.4449	0.078932	5.61107	0.626952	0.0205151	12	489.745	26.4621	489.89	28.9409	488.47	129.656	410.46	48.8175	-0.261031	0.0297516	489.745	26.4621
2SMST112-386	0.0582296	4.99342	0.635257	6.39924	0.0789875	4.74349	0.634444	0.0224946	6.59002	490.077	22.3851	499.365	25.2471	538.41	109.235	449.627	29.3246	8.97707	1.86011	490.077	22.3851
2SMST112-303	0.0644685	5.71508	0.702136	7.62586	0.0789991	5.25203	0.662594	0.0231549	7.69749	490.146	24.7884	540.066	31.9513	757.038	120.569	462.677	35.2407	35.2548	9.24335	490.146	24.7884
2SMST112-132	0.0573573	5.06231	0.626021	8.70372	0.0790019	5.61026	0.835579	0.0208872	14.1511	490.163	26.4801	493.614	34.0377	505.298	111.373	417.828	58.605	2.99526	0.699252	490.163	26.4801
2SMST112-056	0.0628874	6.71121	0.687625	9.66377	0.0791348	8.33649	0.731395	0.0227693	8.95242	490.956	39.4093	531.372	40.0016	704.424	142.795	455.057	40.3237	30.3039	7.606	490.956	39.4093
2SMST112-071	0.060533	7.34759	0.662133	9.905	0.0791377	8.34047	0.688065	0.0181249	9.22524	490.974	39.4295	515.918	40.0857	622.681	158.461	363.064	33.2218	21.1516	4.83486	490.974	39.4295
2SMST112-320	0.0601754	5.54659	0.656958	7.31568	0.0791566	5.11826	0.653666	0.0224053	7.94585	491.087	24.2017	512.752	29.46	609.887	119.876	447.861	35.2257	19.4791	4.22528	491.087	24.2017
2SMST112-048	0.0575074	3.8482	0.629429	5.58079	0.0792387	3.87084	0.724921	0.0208363	5.56716	491.577	18.3208	495.74	21.893	511.043	84.5782	416.82	22.9805	3.80907	0.839756	491.577	18.3208
2SMST112-145	0.0610645	7.96749	0.668444	9.88262	0.0792573	5.52402	0.592581	0.0230031	19.7969	491.688	26.1511	519.766	40.2238	641.508	171.291	459.677	90.1756	23.3543	5.40209	491.688	26.1511
2SMST112-366	0.0584749	4.43167	0.639953	7.23484	0.0792581	5.55727	0.79076	0.0228937	7.59913	491.693	26.3088	502.277	28.6742	547.6	96.7939	457.514	34.4059	10.2095	2.10724	491.693	26.3088
2SMST112-258	0.0585188	8.60537	0.639206	11.2602	0.0792762	8.66792	0.655069	0.0206573	11.1842	491.801	41.044	501.814	44.6132	549.24	187.901	413.277	45.8044	10.4578	1.99538	491.801	41.044
2SMST112-008	0.0620806	11.3014	0.678451	12.0066	0.0792816	4.27777	0.338163	0.0289327	17.3157	491.834	20.257	525.838	49.3176	676.887	241.548	576.494	98.6539	27.3389	6.46667	491.834	20.257
2SMST112-098	0.0623671	6.42311	0.683751	7.76817	0.0793089	5.01924	0.567846	0.015119	10.856	491.997	23.7757	529.039	32.0415	686.722	137.062	303.302	32.7071	28.3558	7.0018	491.997	23.7757
2SMST112-044	0.0574104	5.32098	0.629145	7.37826	0.0793463	4.97721	0.693002	0.0219159	7.73712	492.22	23.587	495.563	28.9396	507.333	117.023	438.185	33.5659	2.97887	0.674639	492.22	23.587
2SMST112-089	0.060346	5.63409	0.661945	7.69286	0.0793503	5.94331	0.686336	0.0122581	7.26093	492.244	28.1667	515.803	31.1214	616.004	121.643	246.257	17.7798	20.0908	4.56754	492.244	28.1667
2SMST112-326	0.0588773	7.86889	0.644725	11.1779	0.0793831	8.25656	0.710779	0.0221799	7.43088	492.44	39.1449	505.227	44.5195	562.562	171.431	443.406	32.6165	12.4649	2.53109	492.44	39.1449
2SMST112-088	0.0699237	6.66707	0.767433	7.5716	0.0793948	4.55689	0.487561	0.0235695	14.7708	492.509	21.6073	578.289	33.3943	926.113	136.951	470.864	68.8638	46.8197	14.8334	492.509	21.6073
2SMST112-122	0.0561583	5.18885	0.616265	9.7421	0.0794112	5.96582	0.891053	0.0184481	18.1194	492.607	28.2935	487.504	37.7344	458.631	115.057	369.48	66.4483	-7.40821	-1.04686	492.607	28.2935
2SMST112-144	0.060802	4.61612	0.666934	6.4654	0.079418	4.10149	0.703585	0.0194377	17.0812	492.648	19.4532	518.846	26.2716	632.235	99.3943	389.11	65.9366	22.0784	5.04933	492.648	19.4532
2SMST112-332	0.0573594	5.94287	0.628933	7.60368	0.0794734	4.89101	0.624101	0.0227983	12.0196	492.979	23.2128	495.431	29.8181	505.377	130.744	455.631	54.2252	2.45323	0.495028	492.979	23.2128
2SMST112-042	0.0574092	4.06786	0.630476	5.78432	0.0795205	3.94915	0.711518	0.0234867	5.58215	493.26	18.753	496.393	22.7148	507.286	89.464	469.23	25.908	2.7648	0.631043	493.26	18.753
2SMST112-389	0.0589079	3.32602	0.647342	4.13439	0.0795622	3.53771	0.634002	0.0180334	4.75932	493.509	16.8074	506.842	16.4979	563.692	72.4464	361.248	17.0474	12.4506	2.6305	493.509	16.8074
2SMST112-161	0.0705156	9.55878	0.77451	10.0582	0.0795645	4.13651	0.323362	0.0238672	18.1275	493.523	19.6528	582.347	44.6043	943.405	195.838	476.742	85.5909	47.6871	15.2528	493.523	19.6528
2SMST112-067	0.0569841	4.19191	0.627203	7.31375	0.079639	7.12868	0.831812	0.0206979	7.57743	493.968	33.8984	494.352	28.632	490.92	92.4528	414.08	31.0813	-0.620887	0.0777142	493.968	33.8984
2SMST112-231	0.0585043	5.03061	0.642073	7.62973	0.0796397	5.17993	0.755759	0.0202558	9.17916	493.972	24.6317	503.589	30.3012	548.7	109.855	405.324	36.8684	9.9742	1.90977	493.972	24.6317
2SMST112-177	0.061605	6.30069	0.677044	7.7093	0.0796522	5.7841	0.596421	0.022337	14.587	494.047	27.5087	524.986	31.6124	660.424	135.033	446.513	64.5216	25.1925	5.89341	494.047	27.5087
2SMST112-344	0.0584716	4.10721	0.642941	6.11332	0.079675	4.0107	0.74615	0.0231828	9.74988	494.183	19.0796	504.125	24.2963	547.478	89.7093	463.227	44.6998	9.73477	1.97228	494.183	19.0796
2SMST112-392	0.0587789	4.50876	0.646946	5.55176	0.0796874	4.12039	0.600441	0.0218057	6.14103	494.257	19.6042	506.597	22.1471	558.916	98.2883	436.005	26.5058	11.5687	2.43598	494.257	19.6042
2SMST112-208	0.0585457	13.917	0.643526	19.8875	0.0797296	14.7474	0.71485	0.0196932	16.1266	494.509	70.2031	504.487	79.2282	550.245	303.831	394.174	63.0492	10.1293	1.97787	494.509	70.2031
2SMST112-296	0.0565955	3.80766	0.622077	6.20608	0.0797404	4.72556	0.79019	0.0207862	4.70938	494.573	22.4974	491.148	24.1714	475.807	84.1789	415.829	19.3922	-3.94408	-0.697304	494.573	22.4974
2SMST112-111	0.0578984	10.0739	0.6383	14.5888	0.0797626	9.5492	0.726924	0.0197905	14.5887	494.706	45.4741	501.253	57.7762	525.92	220.845	396.103	57.3048	5.93518	1.30621	494.706	45.4741
2SMST112-153	0.0570299	4.83554	0.62818	6.52825	0.0797727	4.34787	0.67185	0.0206991	13.6846	494.766	20.707	494.962	25.58	492.69	106.616	414.104	56.1698	-0.421424	0.0395638	494.766	20.707
2SMST112-365	0.0610736	5.63179	0.672964	7.87238	0.0798014	5.33267	0.699066	0.0247754	6.9307	494.937	25.4057	522.513	32.1652	641.829	121.07	494.663	33.8959	22.8864	5.27754	494.937	25.4057
2SMST112-049	0.0566923	3.25028	0.624935	4.75225	0.0798016	3.26594	0.730833	0.0236492	5.21778	494.938	15.5594	492.936	18.5599	479.583	71.8261	472.437	24.3796	-3.20187	-0.406266	494.938	15.5594
2SMST112-232	0.0567091	4.62621	0.623681	7.03918	0.079808	4.69831	0.759281	0.0218061	9.41858	494.977	22.3852	492.152	27.4612	480.24	102.22	436.013	40.6673	-3.06854	-0.573933	494.977	22.3852
2SMST112-097	0.0568207	4.85877	0.626879	6.23087	0.0798098	4.61743	0.634967	0.020205	10.9151	494.987	22.0003	494.15	24.3832	484.58	107.278	404.317	43.7403	-2.14768	-0.169461	494.987	22.0003
2SMST112-293	0.0596236	4.47927	0.656225	6.85584	0.0798491	4.95347	0.75788	0.0194585	5.10379	495.222	23.6122	512.302	27.5887	589.944	97.1339	389.522	19.6997	16.056	3.33402	495.222	23.6122
2SMST112-393	0.0588826	4.52047	0.649494	5.67384	0.0798607	4.2711	0.618979	0.0227921	6.90223	495.291	20.3622	508.167	22.6884	562.756	98.4793	455.507	31.1125	11.9884	2.53381	495.291	20.3622
2SMST112-157	0.0644851	11.3775	0.711275	12.2667	0.079889	4.85489	0.374409	0.0194535	13.0677	495.46	23.153	545.503	51.8146	757.582	240.005	389.422	50.4644	34.5997	9.17363	495.46	23.153
2SMST112-241	0.057701	4.36289	0.635326	5.1663	0.0799077	4.2971	0.588306	0.021156	7.34238	495.572	20.4973	499.408	20.3826	518.427	95.7688	423.148	30.7696	4.4085	0.768131	495.572	20.4973
2SMST112-195	0.0573545	4.80212	0.632137	5.27063	0.0799241	5.21999	0.58096	0.0228831	21.2478	495.67	24.9043	497.426	20.7304	505.191	105.65	457.305	96.3053	1.88471	0.353073	495.67	24.9043
2SMST112-171	0.0574837	3.28785	0.63422	4.23712	0.079953	3.75787	0.667758	0.0205688	9.66794	495.842	17.9346	498.721	16.6982	510.139	72.2737	411.524	39.4221	2.80241	0.577262	495.842	17.9346
2SMST112-026	0.0580273	5.78288	0.640355	6.79294	0.0799773	3.9086	0.526903	0.0247815	7.43296	495.987	18.6592	502.526	26.9322	530.794	126.67	494.783	36.3632	6.55747	1.30111	495.987	18.6592
2SMST112-079	0.0598492	5.725	0.661714	6.8215	0.0799847	6.56917	0.635005	0.0221891	7.19905	496.032	31.3633	515.662	27.5887	598.126	123.977	443.588	31.611	17.069	3.80681	496.032	31.3633
2SMST112-080	0.0580736	6.29649	0.643777	8.83665	0.0801954	7.47854	0.713996	0.0231885	9.12241	497.289	35.7921	504.642	35.1547	532.538	137.879	463.34	41.8303	6.61904	1.4571	497.289	35.7921
2SMST112-243	0.0586631	4.17313	0.648503	4.74175	0.0802282	3.98477	0.554322	0.0211333	7.02908	497.485	19.0781	507.557	18.9427	554.616	91.0382	422.701	29.4249	10.301	1.98448	497.485	19.0781
2SMST112-228	0.0571774	5.38782	0.633377	8.42313	0.0803806	5.1205	0.789926	0.0210661	10.4672	498.394	24.5588	498.197	33.1767	498.381	118.676	421.37	43.6962	-0.00264055	-0.0395268	498.394	24.5588
2SMST112-308	0.0576768	3.52765	0.639494	4.94278	0.0804162	4.0481	0.709033	0.0188814	5.23776	498.607	19.4233	501.993	19.5786	517.504	77.4468	378.077	19.6282	3.65173	0.674551	498.607	19.4233
2SMST112-340	0.060632	6.9408	0.672923	9.14965	0.0804282	5.69095	0.652276	0.0257663	21.8826	498.678	27.3098	522.488	37.387	626.204	149.6	514.197	111.407	20.3649	4.55706	498.678	27.3098
2SMST112-039	0.0598859	7.67936	0.665205	8.65269	0.0804482	3.81275	0.461246	0.0276412	17.3739	498.797	18.3008	517.793	35.1109	599.453	166.262	551.109	94.6769	16.7913	3.66861	498.797	18.3008
2SMST112-218	0.0604075	9.9804	0.670036	12.5995	0.0804733	6.73655	0.61571	0.023226	18.9157	498.947	32.3443	520.734	51.3718	618.203	215.402	464.081	86.9711	19.2907	4.18384	498.947	32.3443
2SMST112-331	0.058904	4.65473	0.654179	6.61339	0.0804975	4.84707	0.710712	0.023264	8.61643	499.092	23.2787	511.047	26.5624	563.55	101.39	464.83	39.6336	11.4379	2.33943	499.092	23.2787
2SMST112-025	0.0605626	5.45181	0.672828	7.16535	0.0805186	4.91882	0.649946	0.0241877	7.84704	499.218	23.629	522.43	29.2712	623.735	117.555	483.068	37.4919	19.9631	4.44324	499.218	23.629
2SMST112-012	0.0618514	4.47076	0.68681	6.01916	0.0805353	4.14657	0.669834	0.0231894	5.69272	499.317	19.9231	530.882	24.8899	668.973	95.6799	463.358	26.0945	25.3607	5.9457	499.317	19.9231
2SMST112-077	0.0566405	6.85582	0.630633	8.22757	0.0805472	7.07725	0.607761	0.0220535	8.54991	499.388	34.009	496.49	32.3198	477.562	151.521	440.907	37.3234	-4.57039	-0.583752	499.388	34.009
2SMST112-367	0.0567455	4.11425	0.631145	6.91673	0.0805482	5.3939	0.804224	0.0200785	19.8406	499.394	25.92	496.809	27.1813	481.658	90.8857	401.811	79.0892	-3.68225	-0.520297	499.394	25.92
2SMST112-328	0.0579474	3.87376	0.644034	5.82885	0.0805668	4.9106	0.752598	0.0216641	6.04623	499.505	23.6026	504.8	23.1892	527.775	84.8956	433.204	25.9304	5.35642	1.04899	499.505	23.6026
2SMST112-066	0.0571452	6.56588	0.636296	10.5871	0.0805669	9.15832	0.788214	0.0200348	6.89297	499.506	44.0196	500.01	41.8263	497.143	144.655	400.944	27.3832	-0.475359	0.100841	499.506	44.0196
2SMST112-342	0.0590582	7.42769	0.657076	9.67937	0.0806214	5.94685	0.641786	0.0230439	10.4527	499.831	28.6012	512.824	38.991	569.242	161.636	460.484	47.6448	12.1937	2.53371	499.831	28.6012
2SMST112-238	0.0553679	4.56877	0.615273	5.68207	0.0806432	4.23144	0.609678	0.0215152	8.97578	499.961	20.3561	486.88	21.9799	427.111	101.868	430.258	38.247	-17.0565	-2.68659	499.961	20.3561
2SMST112-156	0.0570275	4.48852	0.635175	5.59799	0.0806695	3.7062	0.60072	0.0208386	12.2164	500.118	17.8346	499.315	22.0831	492.597	98.966	416.865	50.4672	-1.52675	-0.160799	500.118	17.8346
2SMST112-193	0.0572682	5.72195	0.637404	7.40271	0.0807082	6.48151	0.667657	0.0208485	10.2274	500.349	31.2038	500.698	29.2685	501.874	125.959	417.063	42.262	0.304003	0.0697307	500.349	31.2038
2SMST112-140	0.0607654	5.79586	0.678018	8.6128	0.0807784	6.07599	0.740531	0.0177486	17.8976	500.768	29.275	525.576	35.3504	630.939	124.823	355.593	63.1849	20.6314	4.7202	500.768	29.275
2SMST112-006	0.0567994	4.22766	0.632899	5.57048	0.0808438	3.87537	0.652585	0.0243756	4.71661	501.157	18.686	497.9	21.9263	483.754	93.3571	486.776	22.6978	-3.59761	-0.654167	501.157	18.686
2SMST112-237	0.0571061	6.61901	0.63658	8.44296	0.0808957	5.82795	0.624297	0.0225335	11.5449	501.467	28.1176	500.186	33.3577	495.631	145.864	450.396	51.488	-1.17737	-0.255991	501.467	28.1176
2SMST112-190	0.0582347	11.1069	0.650395	15.307	0.0809779	11.4407	0.690457	0.0165048	10.1618	501.957	55.2499	508.722	61.3248	538.605	242.964	330.876	33.3767	6.80417	1.32971	501.957	55.2499
2SMST112-377	0.0582562	10.9173	0.652585	14.3508	0.0811125	9.67091	0.649508	0.0227086	9.67959	502.76	46.7746	510.069	57.6028	539.409	238.783	453.857	43.4887	6.79425	1.43286	502.76	46.7746
2SMST112-020	0.0616446	5.70038	0.689837	7.19158	0.081129	4.55082	0.610104	0.0285213	13.143	502.858	22.0145	532.703	29.8182	661.804	122.14	568.412	73.8003	24.017	5.60246	502.858	22.0145
2SMST112-271	0.0566538	4.63907	0.633382	7.93678	0.0811347	6.04	0.81306	0.0222673	6.07913	502.892	29.2203	498.2	31.26	478.084	102.543	445.134	26.7822	-5.18907	-0.94182	502.892	29.2203
2SMST112-356	0.060521	7.15126	0.678224	10.0771	0.0811768	7.02419	0.704588	0.0238521	6.2244	503.143	33.998	525.7	41.374	622.252	154.238	476.445	29.3303	19.1415	4.29088	503.143	33.998
2SMST112-346	0.0587721	2.94708	0.658559	4.97669	0.0811895	3.41531	0.816222	0.0219245	9.19472	503.219	16.5328	513.732	20.0674	558.665	64.2472	438.354	39.9109	9.92474	2.04645	503.219	16.5328
2SMST112-139	0.0570681	4.67875	0.640264	7.08974	0.08122	4.77113	0.755887	0.0217801	18.1767	503.401	23.1042	502.47	28.1071	494.166	103.132	435.499	78.4646	-1.86863	-0.185217	503.401	23.1042
2SMST112-068	0.0564373	4.77167	0.633562	8.51164	0.0812249	8.03607	0.835215	0.020683	9.35826	503.43	38.9171	498.313	33.5316	469.611	105.605	413.784	38.3657	-7.20145	-1.02697	503.43	38.9171
2SMST112-196	0.0571268	6.2695	0.640767	7.74716	0.0813399	6.57579	0.627682	0.024046	8.1093	504.116	31.8868	502.781	30.7297	496.432	138.143	480.272	38.5243	-1.54779	-0.26549	504.116	31.8868
2SMST112-355	0.058841	4.0736	0.661676	5.72772	0.0814589	3.89165	0.703389	0.0231074	7.20543	504.825	18.8965	515.639	23.1625	561.216	88.7674	461.738	32.9199	10.048	2.09711	504.825	18.8965
2SMST112-037	0.0577336	5.35942	0.649539	7.74657	0.0814933	5.47052	0.722225	0.023776	6.32785	505.03	26.5734	508.195	30.9825	519.666	117.618	474.943	29.7252	2.81647	0.622805	505.03	26.5734
2SMST112-176	0.0592687	6.23566	0.666602	8.62046	0.0815134	7.01071	0.699745	0.0224053	17.1579	505.15	34.0629	518.644	35.0241	576.98	135.518	447.862	76.1417	12.4494	2.60193	505.15	34.0629
2SMST112-148	0.0579137	5.22586	0.652456	7.64836	0.0815754	5.24569	0.731601	0.021442	17.304	505.519	25.505	509.989	30.6727	526.498	114.553	428.811	73.5535	3.98462	0.876421	505.519	25.505
2SMST112-096	0.0565126	5.11453	0.63732	6.85348	0.0815811	5.18809	0.671159	0.0214652	9.62526	505.553	25.2266	500.646	27.0937	472.565	113.135	429.269	40.9239	-6.98065	-0.980287	505.553	25.2266
2SMST112-229	0.0565806	5.49433	0.636179	8.71934	0.0815886	5.48983	0.793619	0.0235701	10.2843	505.598	26.696	499.938	34.4372	475.224	121.48	470.876	47.9231	-6.39149	-1.13221	505.598	26.696
2SMST112-191	0.0599891	10.0325	0.675194	10.4553	0.0816122	5.34908	0.33325	0.0213464	7.86946	505.739	26.0185	523.865	42.8141	603.183	217.073	426.917	33.2711	16.1551	3.46022	505.739	26.0185
2SMST112-250	0.0656856	5.72996	0.73872	6.21929	0.081621	4.79696	0.483648	0.023769	7.45971	505.791	23.3353	561.658	26.8363	796.371	120.126	474.803	35.0365	36.488	9.94682	505.791	23.3353
2SMST112-018	0.0580958	4.00709	0.654381	5.54246	0.0816699	3.99091	0.69146	0.0231941	5.60707	506.083	19.4249	511.171	22.2637	533.377	87.7335	463.449	25.7066	5.11728	0.9955	506.083	19.4249
2SMST112-034	0.0579801	8.66949	0.653715	12.4475	0.0816769	8.85561	0.717601	0.0243532	9.2983	506.124	43.1067	510.762	50.0025	529.011	189.957	486.334	44.7306	4.32647	0.908066	506.124	43.1067
2SMST112-120	0.0594772	6.79131	0.671397	11.7004	0.0816808	7.64095	0.834217	0.0202163	19.4057	506.148	37.1956	521.561	47.7585	584.607	147.404	404.542	77.8737	13.4209	2.9553	506.148	37.1956
2SMST112-130	0.0569255	4.75828	0.643056	8.28936	0.0817611	5.23636	0.846561	0.0208711	13.7631	506.626	25.5132	504.196	32.9534	488.649	104.985	417.509	56.9527	-3.67897	-0.48188	506.626	25.5132
2SMST112-024	0.057091	4.70934	0.645066	5.96291	0.0818941	3.85537	0.61425	0.0251366	6.17957	507.419	18.8128	505.438	23.7459	495.049	103.791	501.787	30.6498	-2.49877	-0.391916	507.419	18.8128
2SMST112-035	0.0588628	4.16762	0.665911	5.78915	0.0819503	3.84523	0.694747	0.0230333	5.57972	507.753	18.7752	518.223	23.501	562.026	90.8036	460.274	25.4078	9.65662	2.02039	507.753	18.7752
2SMST112-183	0.0576998	5.22949	0.653001	5.64712	0.0820439	5.35992	0.549607	0.0222222	10.6479	508.311	26.1987	510.324	22.6553	518.381	114.792	444.243	46.8409	1.94249	0.394446	508.311	26.1987
2SMST112-054	0.0574538	7.57043	0.651326	10.8037	0.0820522	8.40794	0.716132	0.0229983	6.35259	508.36	41.1013	509.294	43.2945	508.993	166.446	459.583	28.8866	0.124354	0.183362	508.36	41.1013
2SMST112-249	0.0563497	4.34204	0.637907	4.02549	0.0821592	3.92351	0.40348	0.0210736	7.97072	508.998	19.2026	501.01	15.9204	466.175	96.1538	421.518	33.2775	-9.18593	-1.59445	508.998	19.2026
2SMST112-400	0.058597	4.35642	0.66552	5.05008	0.0822337	3.66497	0.539133	0.0220528	5.21913	509.442	17.9522	517.985	20.4927	552.157	95.0765	440.893	22.7744	7.73604	1.6493	509.442	17.9522
2SMST112-325	0.0582913	12.3175	0.6616	17.7103	0.0822817	12.9258	0.718612	0.0235618	11.0708	509.727	63.3509	515.592	71.7208	540.727	269.348	470.713	51.5751	5.73287	1.1375	509.727	63.3509
2SMST112-149	0.0671594	6.10081	0.76319	7.90509	0.0822857	4.64758	0.637876	0.0276968	19.1197	509.751	22.7787	575.849	34.7568	842.721	126.971	552.202	104.419	39.5112	11.4783	509.751	22.7787
2SMST112-103	0.0583829	6.91763	0.664745	8.25019	0.0823685	5.12997	0.549682	0.0223923	10.4549	510.245	25.1664	517.512	33.4625	544.161	151.18	447.604	46.3352	6.23267	1.40425	510.245	25.1664
2SMST112-277	0.0561922	3.97673	0.638	7.00539	0.0823942	5.06676	0.830171	0.021952	4.9799	510.398	24.8635	501.067	27.7126	459.97	88.1592	438.9	21.6327	-10.9633	-1.86217	510.398	24.8635
2SMST112-391	0.0583406	3.899	0.664395	4.53404	0.0824514	3.44091	0.551084	0.0221211	5.12939	510.738	16.8959	517.299	18.3794	542.575	85.2327	442.243	22.4505	5.86766	1.26821	510.738	16.8959
2SMST112-373	0.0588152	3.17464	0.669742	4.4374	0.0824576	3.98053	0.720616	0.0225397	4.39558	510.775	19.547	520.556	18.0744	560.264	69.1895	450.519	19.5933	8.83309	1.87884	510.775	19.547
2SMST112-248	0.0614979	4.86788	0.698807	5.12416	0.0824681	4.53911	0.497961	0.0236965	8.51592	510.838	22.2926	538.078	21.4057	656.696	104.39	473.373	39.883	22.2109	5.06253	510.838	22.2926
2SMST112-133	0.0557449	5.33643	0.635494	9.02224	0.0825188	5.85411	0.825432	0.0212051	15.1544	511.139	28.7673	499.513	35.6111	442.221	118.669	424.12	63.7034	-15.5847	-2.32762	511.139	28.7673
2SMST112-198	0.0572738	5.39842	0.651894	6.37612	0.0825433	5.83447	0.61225	0.0226693	7.80681	511.286	28.6787	509.643	25.5548	502.093	118.833	453.08	35.0079	-1.83091	-0.322242	511.286	28.6787
2SMST112-185	0.0563246	5.85253	0.641301	8.01132	0.0825449	7.01284	0.704041	0.0204126	8.01935	511.295	34.4715	503.111	31.7943	465.187	129.626	408.429	32.4507	-9.91176	-1.62663	511.295	34.4715
2SMST112-265	0.0567424	4.49943	0.645813	6.7407	0.0826018	4.93614	0.744712	0.0219053	5.86181	511.634	24.2789	505.899	26.8635	481.537	99.3965	437.976	25.4131	-6.2502	-1.13368	511.634	24.2789
2SMST112-127	0.0579933	6.50478	0.662658	10.8003	0.0826966	6.12159	0.845561	0.0214815	19.4134	512.198	30.1416	516.239	43.7343	529.507	142.514	429.591	82.6872	3.26882	0.782645	512.198	30.1416
2SMST112-223	0.0575623	5.33421	0.656417	8.34205	0.0827424	5.38578	0.780604	0.0208481	8.69633	512.471	26.5321	512.42	33.5792	513.143	117.196	417.055	35.9288	0.130923	-0.0100504	512.471	26.5321
2SMST112-134	0.0556055	4.15228	0.636061	6.41061	0.0828009	4.27136	0.768735	0.021341	18.2978	512.82	21.0558	499.864	25.3115	436.649	92.4269	426.811	77.4263	-17.4444	-2.5918	512.82	21.0558
2SMST112-150	0.059992	5.49838	0.686075	8.28319	0.0828105	6.16826	0.747917	0.0225437	13.7901	512.877	30.41	530.44	34.2363	603.287	118.966	450.598	61.5439	14.9863	3.31105	512.877	30.41
2SMST112-204	0.0557447	4.80684	0.636542	6.85345	0.0828215	6.05633	0.729317	0.0226249	6.05956	512.942	29.8619	500.163	27.0733	442.214	106.893	452.204	27.1155	-15.9942	-2.555	512.942	29.8619
2SMST112-290	0.056706	4.11592	0.647423	6.67867	0.0828399	5.02612	0.78834	0.0217434	4.45069	513.051	24.7873	506.892	26.6565	480.117	90.9469	434.773	19.1528	-6.85957	-1.21521	513.051	24.7873
2SMST112-125	0.056013	5.21484	0.641185	9.72097	0.0828406	5.51738	0.91121	0.0196654	18.9741	513.056	27.2103	503.04	38.5811	452.885	115.75	393.625	74.0999	-13.2861	-1.99118	513.056	27.2103
2SMST112-268	0.0567354	4.43941	0.648214	7.31649	0.0829182	5.74421	0.79494	0.0230273	5.6259	513.517	28.3534	507.379	29.2252	481.263	98.0753	460.155	25.6116	-6.70212	-1.20984	513.517	28.3534
2SMST112-358	0.0597159	4.51447	0.6836	6.65774	0.0829197	4.78303	0.73518	0.0229403	5.50552	513.526	23.6094	528.948	27.4553	593.296	97.8419	458.437	24.9707	13.4451	2.91549	513.526	23.6094
2SMST112-256	0.0569746	5.61828	0.651195	7.31458	0.082952	6.65813	0.680357	0.022817	5.31868	513.719	32.877	509.214	29.299	490.552	123.919	455.999	23.9958	-4.72263	-0.884726	513.719	32.877
2SMST112-269	0.0565094	3.3393	0.645899	5.82296	0.0829522	4.68286	0.819366	0.021005	5.39386	513.72	23.1233	505.952	23.2066	472.437	73.8677	420.161	22.4414	-8.73822	-1.53527	513.72	23.1233
2SMST112-152	0.0566396	3.85997	0.648989	6.04894	0.0829813	4.62154	0.769957	0.0208	13.3776	513.893	22.8279	507.856	24.1775	477.528	85.3098	416.102	55.1707	-7.61528	-1.18874	513.893	22.8279
2SMST112-235	0.0586429	4.90532	0.67111	6.36944	0.0830474	4.79587	0.646675	0.0230553	8.84404	514.287	23.7064	521.387	25.9785	553.864	107.025	460.709	40.3246	7.14571	1.36178	514.287	23.7064
2SMST112-197	0.0556009	6.83043	0.637396	8.50967	0.0831343	6.94902	0.62611	0.0208587	7.33923	514.804	34.383	500.693	33.6478	436.465	152.046	417.264	30.3327	-17.9486	-2.81842	514.804	34.383
2SMST112-033	0.0567267	3.26919	0.651214	4.67297	0.0831652	3.6917	0.718144	0.0234974	4.38617	514.988	18.2723	509.225	18.7151	480.925	72.2271	469.442	20.3635	-7.08286	-1.13164	514.988	18.2723
2SMST112-076	0.0632739	7.95367	0.727544	10.2707	0.083184	8.46304	0.654899	0.0238837	7.49641	515.1	41.8975	555.111	43.9472	717.448	168.873	477.067	35.3751	28.2039	7.20778	515.1	41.8975
2SMST112-347	0.0582396	8.61898	0.66864	12.7016	0.0831843	9.08993	0.734783	0.023375	12.3467	515.101	45.0013	519.885	51.7243	538.787	188.534	467.024	57.0815	4.39606	0.920156	515.101	45.0013
2SMST112-240	0.0576213	10.9016	0.661384	15.7602	0.0832982	11.8468	0.722747	0.0240343	13.1219	515.779	58.7246	515.46	63.7889	515.392	239.423	480.042	62.3445	-0.0752234	-0.0618678	515.779	58.7246
2SMST112-394	0.0592921	5.92707	0.682928	7.43797	0.0833921	5.2058	0.610704	0.0247726	14.1655	516.338	25.8313	528.542	30.6567	577.838	128.793	494.608	69.3323	10.6431	2.30906	516.338	25.8313
2SMST112-199	0.0623459	5.70471	0.71728	6.78526	0.0834354	6.0021	0.607984	0.0236074	7.30138	516.595	29.7969	549.06	28.7846	685.995	121.746	471.612	34.0643	24.694	5.91274	516.595	29.7969
2SMST112-038	0.0555991	4.60842	0.641742	6.86535	0.083599	4.95339	0.741493	0.0237168	6.45558	517.569	24.6352	503.384	27.2554	436.393	102.585	473.774	30.2518	-18.6017	-2.818	517.569	24.6352
2SMST112-022	0.0582172	6.33054	0.672991	8.50713	0.0837942	5.81213	0.668186	0.0253448	7.52677	518.73	28.9684	522.529	34.7615	537.945	138.496	505.891	37.6397	3.57193	0.727	518.73	28.9684
2SMST112-075	0.0729756	19.3612	0.846712	19.9776	0.0839394	7.3244	0.266179	0.0317442	20.876	519.594	36.5642	622.843	93.2673	1013.28	392.463	631.648	130.242	48.7214	16.577	519.594	36.5642
2SMST112-316	0.0635045	4.79367	0.735291	6.43352	0.0839596	4.9628	0.674015	0.0257934	6.45909	519.714	24.7802	559.654	27.6868	725.17	101.652	514.732	32.8539	28.332	7.13649	519.714	24.7802
2SMST112-266	0.0581807	5.33254	0.673216	8.93782	0.0839779	7.11491	0.802545	0.0240597	6.47662	519.823	35.5334	522.666	36.5302	536.574	116.69	480.542	30.7792	3.12187	0.544013	519.823	35.5334
2SMST112-063	0.0559235	6.72921	0.649243	10.8971	0.0840061	9.14642	0.788213	0.0214179	8.17739	519.99	45.6936	508.013	43.5844	449.333	149.456	428.333	34.6877	-15.725	-2.35766	519.99	45.6936
2SMST112-300	0.0586917	5.14785	0.679674	7.76519	0.0840062	5.99083	0.749011	0.0226153	5.75491	519.991	29.9287	526.577	31.9154	555.68	112.282	452.013	25.7406	6.42254	1.25078	519.991	29.9287
2SMST112-310	0.0595889	4.12006	0.690255	5.53158	0.084011	4.17092	0.672251	0.0208198	5.5945	520.02	20.8379	532.953	22.9409	588.678	89.3634	416.494	23.0755	11.6631	2.4268	520.02	20.8379
2SMST112-085	0.0656436	6.77944	0.763517	9.26783	0.0841406	6.91503	0.684609	0.0336213	7.64191	520.79	34.5969	576.037	40.7643	795.032	142.158	668.386	50.3047	34.4944	9.59078	520.79	34.5969
2SMST112-107	0.056249	8.66211	0.654566	12.6865	0.0841886	8.81653	0.731538	0.0224917	16.6368	521.076	44.1338	511.285	51.0042	462.21	191.954	449.569	74.1041	-12.7358	-1.91498	521.076	44.1338
2SMST112-084	0.0579797	9.16172	0.674908	13.3084	0.0842072	10.5197	0.728001	0.0209676	9.4078	521.187	52.6708	523.692	54.5038	528.995	200.742	419.421	39.0894	1.47617	0.478411	521.187	52.6708
2SMST112-239	0.0570747	11.0553	0.663168	15.3192	0.0843221	10.9065	0.69252	0.0225373	11.2828	521.869	54.6761	516.55	62.1005	494.42	243.677	450.472	50.3261	-5.55177	-1.02984	521.869	54.6761
2SMST112-270	0.0572508	2.95207	0.666053	6.36118	0.0844323	5.173	0.889035	0.022118	4.14777	522.525	25.9638	518.31	25.8274	501.205	64.9925	442.182	18.1496	-4.25359	-0.813224	522.525	25.9638
2SMST112-155	0.0559191	7.38377	0.653517	10.4081	0.0846424	7.50691	0.704969	0.0223005	13.1339	523.773	37.7647	510.641	41.7922	449.158	163.998	445.791	57.9916	-16.6122	-2.57172	523.773	37.7647
2SMST112-091	0.0562753	6.80588	0.658591	8.35086	0.0846587	5.13271	0.58048	0.0222089	8.1425	523.87	25.8253	513.752	33.6819	463.248	150.792	443.979	35.7885	-13.0863	-1.9695	523.87	25.8253
2SMST112-159	0.0573839	4.90944	0.670719	6.6	0.0846616	4.6907	0.669605	0.0224873	14.4257	523.887	23.6021	521.149	26.91	506.319	107.991	449.484	64.2273	-3.46993	-0.525405	523.887	23.6021
2SMST112-009	0.0580695	4.06787	0.677734	5.1402	0.0846638	3.4257	0.613599	0.0273375	13.75	523.901	17.2374	525.404	21.0867	532.384	89.0794	545.134	74.0899	1.59343	0.286099	523.901	17.2374
2SMST112-385	0.0568537	6.96966	0.664937	9.57034	0.0846791	7.0356	0.686994	0.0223964	7.03221	523.991	35.4078	517.629	38.8286	485.864	153.851	447.687	31.1602	-7.84729	-1.22915	523.991	35.4078
2SMST112-368	0.0623798	11.6141	0.7298	16.0083	0.0847249	10.9343	0.688235	0.0211989	18.9554	524.264	55.0567	556.436	68.6824	687.156	247.815	423.998	79.6904	23.7053	5.78181	524.264	55.0567
2SMST112-349	0.0577458	4.10672	0.675874	6.25575	0.0847997	4.22508	0.758966	0.0230914	9.74626	524.708	21.2912	524.278	25.6227	520.131	90.1193	461.421	44.5109	-0.880029	-0.0820905	524.708	21.2912
2SMST112-015	0.0574246	6.49586	0.67158	9.04989	0.0848079	6.40075	0.696352	0.024654	8.87999	524.757	32.2579	521.672	36.9348	507.875	142.848	492.268	43.2316	-3.32394	-0.591249	524.757	32.2579
2SMST112-117	0.0558142	4.32455	0.654937	7.78911	0.0849044	4.70076	0.874862	0.0202642	10.7922	525.33	23.7152	511.512	31.3093	444.985	96.1212	405.489	43.3715	-18.0557	-2.70141	525.33	23.7152
2SMST112-186	0.0566975	4.69897	0.664851	5.96045	0.085015	5.71817	0.67694	0.0224983	6.21337	525.988	28.8827	517.577	24.1735	479.787	103.836	449.7	27.6519	-9.62949	-1.62501	525.988	28.8827
2SMST112-333	0.0591736	7.13848	0.694427	9.90494	0.085057	6.96949	0.693326	0.0246947	10.8992	526.237	35.2193	535.457	41.2405	573.487	155.23	493.071	53.1604	8.23914	1.72188	526.237	35.2193
2SMST112-092	0.057173	5.53898	0.67255	7.7957	0.0850956	5.74633	0.704438	0.0215281	8.96642	526.466	29.0503	522.261	31.84	498.214	122.009	430.514	38.2297	-5.67067	-0.805157	526.466	29.0503
2SMST112-027	0.0572217	4.28942	0.672242	5.97879	0.0851387	4.46336	0.698289	0.0238995	4.44644	526.722	22.5748	522.075	24.4092	500.087	94.4538	477.379	20.9886	-5.3262	-0.890175	526.722	22.5748
2SMST112-121	0.0581526	8.06839	0.685846	12.6863	0.085345	7.96553	0.788164	0.0206962	18.1321	527.948	40.3784	530.302	52.4517	535.518	176.589	414.047	74.4487	1.41356	0.443868	527.948	40.3784
2SMST112-051	0.0548714	6.56736	0.648062	10.0981	0.0854915	8.37406	0.762552	0.0230239	8.3948	528.818	42.5164	507.286	40.3403	406.985	146.95	460.089	38.2234	-29.9355	-4.24457	528.818	42.5164
2SMST112-282	0.0573774	4.5535	0.676205	7.83987	0.0855195	5.8572	0.817035	0.0255141	7.79469	528.984	29.7467	524.478	32.1244	506.068	100.166	509.227	39.2349	-4.52828	-0.859173	528.984	29.7467
2SMST112-114	0.0580236	7.17481	0.686176	10.4936	0.085563	6.20287	0.745991	0.0227607	11.7291	529.242	31.517	530.5	43.3863	530.654	157.163	454.888	52.8272	0.265946	0.237117	529.242	31.517
2SMST112-360	0.059291	13.1903	0.700442	19.4393	0.0855682	14.1734	0.734585	0.0204695	6.71736	529.273	72.0222	539.055	81.4802	577.8	286.622	409.558	27.253	8.39846	1.81456	529.273	72.0222
2SMST112-143	0.0626664	4.88745	0.742164	6.58495	0.0857455	3.9754	0.673818	0.0211443	17.0927	530.326	20.2388	563.668	28.491	696.928	104.118	422.917	71.6637	23.9052	5.91516	530.326	20.2388
2SMST112-330	0.0684053	5.0126	0.80996	6.2914	0.0858294	3.98488	0.604992	0.0285227	22.7359	530.824	20.3053	602.431	28.5948	880.859	103.707	568.439	127.843	39.7379	11.8864	530.824	20.3053
2SMST112-090	0.0553872	4.9029	0.657933	6.92519	0.0859303	5.18146	0.70741	0.0219874	8.12833	531.423	26.4312	513.349	27.9117	427.886	109.303	439.6	35.3773	-24.1975	-3.52098	531.423	26.4312
2SMST112-294	0.0567715	7.63494	0.673978	11.7273	0.0861281	8.76557	0.759133	0.0234297	7.22965	532.597	44.8094	523.128	47.9785	482.667	168.63	468.105	33.4812	-10.3446	-1.8101	532.597	44.8094
2SMST112-287	0.0578432	4.80625	0.686971	7.75205	0.0861753	5.73651	0.785948	0.0241706	10.7873	532.878	29.3394	530.979	32.0643	523.828	105.403	482.731	51.5222	-1.72765	-0.357568	532.878	29.3394
2SMST112-302	0.0591703	4.18776	0.703333	6.80737	0.0862211	5.55834	0.788871	0.0239535	4.14809	533.149	28.4421	540.78	28.5486	573.368	91.0671	478.445	19.6228	7.01441	1.41107	533.149	28.4421
2SMST112-202	0.0568885	5.13829	0.676459	7.55016	0.0862426	6.58924	0.743932	0.0222156	5.75899	533.277	33.725	524.632	30.9435	487.212	113.398	444.113	25.3133	-9.45483	-1.6477	533.277	33.725
2SMST112-131	0.0559604	6.2284	0.667224	10.0308	0.0863019	6.57041	0.796536	0.0227404	15.9892	533.629	33.6499	519.023	40.7826	450.798	138.297	454.485	71.9857	-18.3743	-2.81407	533.629	33.6499
2SMST112-116	0.0566256	4.77849	0.676305	8.66589	0.0864173	5.69142	0.85821	0.0224083	10.8181	534.313	29.1841	524.539	35.5148	476.98	105.62	447.922	47.9808	-12.02	-1.86345	534.313	29.1841
2SMST112-286	0.0568325	5.68906	0.67706	8.78079	0.0864447	6.37575	0.7626	0.023054	5.14305	534.476	32.7027	524.996	36.0101	485.04	125.6	460.682	23.4387	-10.1921	-1.8058	534.476	32.7027
2SMST112-126	0.0565146	7.77352	0.675054	12.7337	0.0864463	8.05351	0.812176	0.021665	19.5322	534.486	41.3093	523.781	52.1527	472.642	171.95	433.222	83.8914	-13.0847	-2.04382	534.486	41.3093
2SMST112-262	0.0662238	8.51528	0.788973	9.83209	0.0864655	6.17826	0.513053	0.0228558	8.72979	534.6	31.6968	590.589	44.0562	813.457	178.037	456.766	39.466	34.2805	9.48026	534.6	31.6968
2SMST112-154	0.0582342	5.34629	0.696508	6.70567	0.0866224	4.35067	0.605184	0.0196254	13.0154	535.53	22.3577	536.703	27.961	538.583	116.951	392.831	50.6985	0.566746	0.218553	535.53	22.3577
2SMST112-108	0.0569575	4.68469	0.686972	7.26778	0.0872584	4.76345	0.773617	0.0216614	12.1172	539.303	24.6443	530.98	30.0601	489.889	103.34	433.15	51.994	-10.0866	-1.56747	539.303	24.6443
2SMST112-007	0.0578779	5.90522	0.696794	7.83854	0.0873425	5.33221	0.657989	0.0253722	6.44703	539.801	27.6113	536.874	32.6957	525.143	129.475	506.431	32.2699	-2.79124	-0.545149	539.801	27.6113
2SMST112-016	0.0567514	5.6337	0.68361	7.65502	0.087347	5.3034	0.677218	0.0264945	6.43384	539.828	27.4635	528.954	31.5706	481.885	124.446	528.541	33.5926	-12.0242	-2.05574	539.828	27.4635
2SMST112-372	0.0578306	4.08528	0.698579	5.93964	0.0874735	4.98219	0.733499	0.0233618	5.54091	540.578	25.8344	537.942	24.8088	523.351	89.5992	466.763	25.5828	-3.29166	-0.489995	540.578	25.8344
2SMST112-001	0.0569283	4.47649	0.687451	5.79724	0.087638	3.92816	0.636722	0.025217	4.85739	541.553	20.4041	531.268	23.9851	488.759	98.7661	503.371	24.1632	-10.8017	-1.93596	541.553	20.4041
2SMST112-124	0.0578764	6.96283	0.70113	11.9482	0.0876674	7.57741	0.83776	0.019373	20.7552	541.727	39.3719	539.466	50.0432	525.088	152.665	387.828	79.8846	-3.1688	-0.41915	541.727	39.3719
2SMST112-014	0.0590714	5.09711	0.714929	7.32182	0.0877692	5.37529	0.718073	0.0232146	8.21525	542.331	27.9594	547.669	31.0028	569.727	110.91	463.854	37.708	4.80872	0.974754	542.331	27.9594
2SMST112-283	0.0572112	3.85205	0.692517	7.23569	0.087836	5.57624	0.850246	0.0212477	5.14285	542.726	29.0249	534.312	30.0701	499.686	84.8286	424.965	21.6388	-8.61354	-1.57479	542.726	29.0249
2SMST112-314	0.0581048	12.7999	0.706377	17.7117	0.0881596	12.4935	0.691326	0.0225136	16.8289	544.643	65.2518	542.593	74.5818	533.715	280.232	450.003	75.033	-2.04757	-0.377931	544.643	65.2518
2SMST112-128	0.0580262	15.3	0.71272	22.2495	0.0888949	14.9697	0.728145	0.0194438	19.6558	548.998	78.785	546.36	94.2821	530.751	335.137	389.231	75.917	-3.43798	-0.482871	548.998	78.785
2SMST112-017	0.0577334	8.55056	0.710075	12.1617	0.0891811	8.72123	0.711142	0.0278569	10.0012	550.692	46.0337	544.791	51.3195	519.661	187.651	555.35	54.8597	-5.97154	-1.08324	550.692	46.0337
2SMST112-109	0.0596685	5.69312	0.735871	7.77234	0.0892236	4.45126	0.690981	0.0222786	12.0665	550.943	23.5053	559.993	33.4675	591.574	123.423	445.358	53.2215	6.86826	1.61605	550.943	23.5053
2SMST112-003	0.0563903	7.53427	0.703164	10.5688	0.0904865	7.53627	0.701384	0.0256316	7.40894	558.414	40.3129	540.679	44.3334	467.769	166.799	511.544	37.4591	-19.3783	-3.28013	558.414	40.3129
2SMST112-158	0.0673261	7.24229	0.844046	9.6357	0.0908039	6.55295	0.659916	0.0279171	15.0695	560.29	35.1656	621.376	44.8115	847.877	150.606	556.534	82.8926	33.9185	9.83075	560.29	35.1656
2SMST112-305	0.0648175	15.4741	0.834493	17.5672	0.0933821	8.57674	0.473621	0.0271893	22.3669	575.508	47.2215	616.102	81.3143	768.418	325.856	542.217	120.021	25.1048	6.5888	575.508	47.2215
2SMST112-021	0.0882821	6.18434	3.24584	8.25309	0.26652	5.59937	0.662385	1.32087	71.8231	1523.11	75.9618	1468.18	64.1486	1388.63	118.704	17017.5	10622.4	-9.68456	-3.74136	1388.63	118.704
2SMST112-285	0.0883258	8.46057	3.15755	13.0275	0.259403	9.69777	0.760584	0.0477634	33.7766	1486.79	128.783	1446.84	100.792	1389.58	162.374	943.058	313.637	-6.99537	-2.76062	1389.58	162.374
2SMST112-201	0.0891176	4.127	2.88378	6.3478	0.23469	6.00647	0.778173	0.0647132	5.90246	1359.03	73.6027	1377.68	47.8942	1406.69	79.0196	1267.42	72.642	3.38771	1.35353	1406.69	79.0196
2SMST112-165	0.0893679	6.52069	2.851	9.04205	0.231122	7.05883	0.697725	0.0611652	14.1987	1340.38	85.4312	1369.08	68.0723	1412.06	124.76	1199.95	166.1	5.07642	2.09626	1412.06	124.76
2SMST112-357	0.0899349	3.86441	3.33372	6.10558	0.268508	4.61268	0.77444	1.57132	108.143	1533.23	62.9434	1488.98	47.7249	1424.15	73.8164	19088.8	19088.8	-7.65919	-2.97122	1424.15	73.8164
2SMST112-236	0.0900076	4.64702	3.33013	5.871	0.268493	4.40075	0.623925	0.871941	171.391	1533.15	60.0486	1488.14	45.8772	1425.69	88.7468	12672.6	12672.6	-7.53722	-3.02432	1425.69	88.7468
2SMST112-375	0.0900607	4.0386	2.87899	5.12749	0.231477	4.09271	0.6369	3.18379	144.153	1342.23	49.5928	1376.43	38.6604	1426.82	77.1158	28928.1	28928.1	5.92819	2.48429	1426.82	77.1158
2SMST112-264	0.0901043	5.0752	2.65549	6.14881	0.21389	5.10501	0.607068	0.303848	28.4497	1249.51	57.988	1316.17	45.3847	1427.74	96.897	5362.71	1386.54	12.4835	5.06468	1427.74	96.897
2SMST112-304	0.0923184	3.98295	3.47896	6.07456	0.273339	5.04348	0.758449	0.273357	49.4828	1557.73	69.7949	1522.46	47.9446	1473.94	75.5711	4884.42	2269.9	-5.68456	-2.31692	1473.94	75.5711
2SMST112-164	0.0924826	7.96174	2.87572	10.8902	0.225266	8.11141	0.684905	0.0317287	31.3663	1309.64	96.1418	1375.57	82.2257	1477.32	150.996	631.345	195.915	11.3499	4.79289	1477.32	150.996
2SMST112-371	0.0924984	5.78143	2.94499	8.3642	0.230555	6.53968	0.724895	0.0635818	7.84803	1337.41	78.9896	1393.56	63.4831	1477.64	109.641	1245.93	95.0511	9.49023	4.02942	1477.64	109.641
2SMST112-061	0.0934506	7.93658	3.68294	11.2964	0.285184	8.6494	0.713519	0.323244	21.0858	1617.42	123.742	1567.68	90.4469	1497.03	150.125	5661.17	1068.88	-8.04154	-3.17301	1497.03	150.125
2SMST112-301	0.0948782	3.47833	3.64663	5.73789	0.278798	4.78715	0.79622	1.31063	25.3084	1585.31	67.2821	1559.77	45.7541	1525.66	65.547	16928.1	3132.15	-3.90981	-1.63706	1525.66	65.547
2SMST112-005	0.0961013	4.13074	3.40814	5.4151	0.257317	3.75789	0.648228	0.0707119	12.9514	1476.1	49.5786	1506.27	42.5356	1549.75	77.596	1380.97	173.625	4.75266	2.00314	1549.75	77.596
2SMST112-137	0.0963751	7.13182	3.45231	9.43394	0.259313	5.7032	0.656674	0.413967	35.9199	1486.33	75.7089	1516.4	74.4087	1555.1	133.878	7001.51	2245.85	4.42222	1.98301	1555.1	133.878
2SMST112-147	0.0969293	8.27957	3.39795	12.4788	0.253829	9.13775	0.748357	0.0341438	22.8771	1458.19	119.264	1503.92	98.2019	1565.85	155.206	678.602	153.247	6.87526	3.04061	1565.85	155.206
2SMST112-188	0.0981212	10.7944	3.24997	14.8818	0.240143	11.1445	0.690829	0.0689868	27.4079	1387.44	139.137	1469.17	116.055	1588.72	201.751	1348.38	360.705	12.6695	5.56302	1588.72	201.751
2SMST112-298	0.0996874	7.7749	3.27527	11.8913	0.238347	8.90323	0.756683	0.0143933	9.85788	1378.1	110.478	1475.2	92.7574	1618.26	144.765	288.848	28.2916	14.8407	6.58215	1618.26	144.765
2SMST112-182	0.100995	6.08217	3.77702	7.48757	0.271109	6.57703	0.632826	0.0406901	12.9187	1546.43	90.4352	1587.87	60.1827	1642.49	112.867	806.146	102.353	5.84832	2.61002	1642.49	112.867
2SMST112-057	0.101208	9.45941	3.68583	13.2894	0.263567	10.4056	0.706532	0.055185	17.2801	1508.07	139.942	1568.3	106.53	1646.39	175.452	1085.72	183.494	8.40136	3.84087	1646.39	175.452
2SMST112-354	0.101419	4.1244	3.91012	6.35824	0.279292	4.42691	0.764087	0.0684046	8.9091	1587.8	62.3048	1615.78	51.4561	1650.24	76.4614	1337.37	115.622	3.78385	1.73169	1650.24	76.4614
2SMST112-162	0.101462	7.93416	4.10388	10.9797	0.293008	8.05713	0.692481	0.069732	12.0043	1656.54	117.713	1655.08	89.8768	1651.03	147.075	1362.47	158.786	-0.334003	-0.088679	1651.03	147.075
2SMST112-323	0.101749	8.81605	4.15345	13.1294	0.295944	9.90453	0.741145	0.072172	8.45523	1671.17	145.831	1664.89	107.848	1656.26	163.314	1408.52	115.367	-0.899983	-0.377071	1656.26	163.314
2SMST112-251	0.102035	6.88924	4.02635	9.90244	0.286391	8.23167	0.725996	0.0721248	8.06765	1623.47	118.152	1639.53	80.7131	1661.46	127.537	1407.63	109.997	2.28656	0.979866	1661.46	127.537
2SMST112-311	0.102037	6.56445	4.39648	9.45502	0.312477	7.0766	0.720255	0.0736997	5.07377	1752.88	108.62	1711.68	78.3696	1661.5	121.524	1437.3	70.5156	-5.49986	-2.40724	1661.5	121.524
2SMST112-338	0.102306	4.75705	3.66058	7.81875	0.259306	5.98742	0.794125	0.0378051	10.9411	1486.29	79.4806	1562.82	62.4344	1666.37	88.0102	750.035	80.7192	10.8068	4.89666	1666.37	88.0102
2SMST112-019	0.102428	2.8807	3.98266	4.09799	0.281906	3.12416	0.712951	0.0804804	4.89533	1600.96	44.2901	1630.67	33.2712	1668.58	53.2809	1564.54	73.835	4.05296	1.82204	1668.58	53.2809
2SMST112-345	0.102439	14.7488	4.19078	21.6044	0.296427	15.6462	0.730748	0.076031	16.6007	1673.56	230.718	1672.22	178.936	1668.78	272.786	1481.14	238.488	-0.287006	-0.0804948	1668.78	272.786
2SMST112-011	0.102568	4.56926	4.17664	6.6438	0.295348	4.92083	0.726096	0.0693398	21.2997	1668.2	72.3307	1669.45	54.4806	1671.11	84.4855	1355.06	281.107	0.173815	0.0746903	1671.11	84.4855
2SMST112-278	0.102587	7.34628	3.83205	11.3524	0.271075	8.20484	0.763481	0.0286399	7.19738	1546.26	112.811	1599.5	91.6629	1671.44	135.827	570.741	40.5445	7.48958	3.32904	1671.44	135.827
2SMST112-341	0.102813	5.62088	3.75794	8.3406	0.264865	5.90058	0.739501	0.0682324	9.53697	1514.68	79.6554	1583.81	66.9865	1675.52	103.872	1334.12	123.503	9.59925	4.36451	1675.52	103.872
2SMST112-336	0.10285	4.18288	3.79747	5.77693	0.267592	3.63624	0.692619	0.660394	21.9383	1528.57	49.485	1592.21	46.4636	1676.18	77.2919	10248.7	1845.37	8.80634	3.99716	1676.18	77.2919
2SMST112-307	0.103123	4.62842	3.66162	6.56136	0.257533	5.10192	0.711845	0.0247717	6.05336	1477.21	67.3567	1563.04	52.3776	1681.08	85.4721	494.59	29.5976	12.1276	5.49153	1681.08	85.4721
2SMST112-374	0.103223	8.87385	4.01704	12.7528	0.281798	9.52143	0.718741	0.0738869	7.62424	1600.41	134.959	1637.65	104.042	1682.86	163.835	1440.82	106.307	4.89944	2.27392	1682.86	163.835
2SMST112-261	0.103854	3.9391	3.98009	5.03891	0.278143	4.88723	0.685428	0.0714263	4.35218	1582	68.5623	1630.15	40.9127	1694.11	72.6239	1394.46	58.7283	6.61731	2.9534	1694.11	72.6239
2SMST112-163	0.104139	5.47816	3.61528	7.52802	0.251495	5.8288	0.690938	0.0311857	11.5056	1446.18	75.5124	1552.9	59.9458	1699.15	100.935	620.703	70.4528	14.8881	6.872	1699.15	100.935
2SMST112-398	0.105394	3.74986	3.75152	5.18736	0.257719	4.44459	0.707019	0.0378873	13.4852	1478.16	58.7117	1582.44	41.6097	1721.2	68.902	751.637	99.7437	14.1203	6.58952	1721.2	68.902
2SMST112-166	0.107053	6.93226	3.76965	8.7351	0.255134	6.23166	0.616151	0.149598	28.2508	1464.9	81.6625	1586.31	70.2108	1749.84	126.928	2817.83	757.064	16.2837	7.6536	1749.84	126.928
2SMST112-078	0.117626	8.46142	4.48194	9.36582	0.275651	6.74683	0.487759	0.393653	34.75	1569.42	93.9888	1727.63	77.9037	1920.47	151.727	6709.01	2088.19	18.2793	9.15768	1920.47	151.727
2SMST112-058	0.152631	14.7322	7.89403	17.0296	0.374298	9.70151	0.50568	0.373577	19.5373	2049.59	170.371	2219	154.659	2375.61	251.186	6415.74	1103.59	13.7235	7.63424	2375.61	251.186
Rejected data
Analysis_name	bias_corr_samples_Pb207_Pb206	bias_corr_samples_Pb207_Pb206_err	bias_corr_samples_Pb207_U235	bias_corr_samples_Pb207_U235_err	bias_corr_samples_Pb206_U238	bias_corr_samples_Pb206_U238_err	rho	bias_corr_samples_Pb208_Th232	bias_corr_samples_Pb208_Th232_err	samples_Pb206_U238_age,	samples_Pb206_U238_age_err	samples_Pb207_U235_age	samples_Pb207_U235_age_err	samples_Pb207_Pb206_age	samples_Pb207_Pb206_age_err	samples_Pb208_Th232_age	samples_Pb208_Th232_age_err	discordance_Pb206U238_Pb207Pb206	discordance_Pb206U238_Pb207U235	best_age	best_age_err
2SMST112-106	0.071934	5.55766	0.313537	8.48869	0.031533	5.74338	0.760523	0.0104088	12.6107	200.136	11.318	276.919	20.5768	984.074	113.144	209.297	26.2746	79.6625	27.7276	200.136	11.318
2SMST112-094	0.0705072	5.12713	0.33293	7.3703	0.0341582	5.84281	0.721872	0.0108	9.86598	216.521	12.4408	291.8	18.6943	943.16	105.047	217.123	21.3179	77.0431	25.7983	216.521	12.4408
2SMST112-348	0.0818099	5.16775	0.388608	7.45601	0.0344163	4.94657	0.723326	0.00500639	9.63874	218.129	10.6094	333.352	21.19	1240.97	101.269	100.938	9.70723	82.4227	34.5649	218.129	10.6094
2SMST112-095	0.12389	15.9082	0.646489	17.7327	0.0377487	8.21484	0.442306	0.0199736	9.74057	238.863	19.2632	506.316	70.8126	2012.99	282.216	399.731	38.5904	88.1339	52.8233	238.863	19.2632
2SMST112-135	0.078695	6.03361	0.42167	9.79509	0.0387872	7.34365	0.788723	0.00336592	21.0579	245.311	17.6764	357.245	29.5076	1164.47	119.555	67.9185	14.2832	78.9338	31.3325	245.311	17.6764
2SMST112-382	0.216358	8.42099	1.22979	9.41562	0.0411552	4.95078	0.453195	0.0048047	7.86571	259.989	12.6154	814.245	52.7761	2953.78	135.944	96.8812	7.60358	91.1981	68.0699	259.989	12.6154
2SMST112-353	0.0785658	5.40647	0.527752	8.00986	0.0486629	5.57754	0.739076	0.00871044	8.18349	306.307	16.6849	430.317	28.1024	1161.22	107.18	175.295	14.2883	73.6219	28.8183	306.307	16.6849
2SMST112-397	0.119415	24.934	0.88094	26.6262	0.0534124	9.70358	0.35107	0.0205801	5.31016	335.438	31.7174	641.49	127.285	1947.48	445.724	411.748	21.6549	82.7758	47.7096	335.438	31.7174
2SMST112-390	0.143478	7.17956	1.27024	8.04948	0.0640982	4.44215	0.46118	0.0110986	8.18354	400.501	17.2495	832.499	45.7621	2269.61	123.731	223.091	18.1645	82.3538	51.8918	400.501	17.2495
2SMST112-187	0.153823	8.34288	1.43254	9.13965	0.0675198	5.76024	0.447417	0.021516	6.60401	421.196	23.4864	902.612	54.7049	2388.86	142.049	430.274	28.1346	82.3684	53.3359	421.196	23.4864
2SMST112-380	0.104397	6.14575	0.978642	8.23913	0.0678755	6.07309	0.669459	0.0113315	8.25569	423.343	24.8841	692.909	41.4008	1703.72	113.171	227.747	18.7052	75.1519	38.9034	423.343	24.8841
2SMST112-350	0.0865078	7.86209	0.833435	8.95177	0.0698002	3.80823	0.48143	0.0192987	12.4338	434.952	16.0176	615.516	41.3414	1349.55	151.724	386.353	47.6383	67.7707	29.3355	434.952	16.0176
2SMST112-220	0.326321	14.296	3.17927	25.6396	0.0706883	20.9972	0.830203	0.0394699	20.1744	440.301	89.3702	1452.14	200.617	3599.89	219.442	782.432	155.431	87.769	69.6791	440.301	89.3702
2SMST112-274	0.0805733	11.5932	0.855757	19.4026	0.0770764	15.3125	0.801966	0.017277	13.9551	478.648	70.6408	627.804	91.0926	1211.06	228.165	346.225	47.9613	60.4768	23.7583	478.648	70.6408
2SMST112-083	0.0586964	21.6352	0.659856	30.6692	0.0813243	22.1361	0.708888	0.018954	17.9096	504.023	107.331	514.526	124.416	555.852	471.881	379.517	67.4481	9.32432	2.04129	504.023	107.331
2SMST112-289	0.0914148	4.04476	1.03373	8.55905	0.08205	7.26709	0.881904	0.0108544	10.7332	508.347	35.5234	720.794	44.2023	1455.26	76.9376	218.21	23.3085	65.0682	29.474	508.347	35.5234
2SMST112-167	0.0663038	24.2566	0.751352	33.8425	0.082107	23.8226	0.697359	0.0194836	23.1371	508.687	116.537	569.009	148.471	815.98	506.955	390.02	89.5723	37.6594	10.6012	508.687	116.537
2SMST112-224	0.0578078	20.3047	0.67022	28.9471	0.0841249	20.2472	0.712851	0.0216511	13.5592	520.697	101.29	520.846	118.479	522.484	445.394	432.947	58.1635	0.341916	0.0285672	520.697	101.29
2SMST112-364	0.0611182	16.5459	0.71356	23.5488	0.0845551	16.7021	0.711568	0.0254901	16.5118	523.254	83.9462	546.858	99.8912	643.396	355.605	508.756	83.1269	18.6731	4.31622	523.254	83.9462
2SMST112-013	0.0585103	16.2069	0.692523	23.7459	0.0858379	17.4001	0.730877	0.0234943	20.0703	530.875	88.6769	534.315	98.9671	548.924	353.901	469.38	93.3356	3.288	0.643879	530.875	88.6769
2SMST112-028	0.147105	21.7618	1.74981	23.2324	0.0861982	8.29114	0.350195	0.0272471	6.01684	533.014	42.4158	1027.09	151.219	2312.54	373.481	543.354	32.283	76.9512	48.1047	533.014	42.4158
2SMST112-381	0.112844	8.77539	1.35943	11.0407	0.087226	7.18746	0.608342	0.0383422	8.07315	539.11	37.1727	871.625	64.6791	1845.71	158.73	760.494	60.3452	70.7912	38.1488	539.11	37.1727
2SMST112-115	0.0570249	19.8496	0.691113	28.8555	0.08769	20.4637	0.726004	0.020587	12.1525	541.861	106.362	533.469	120.299	492.496	437.666	411.885	49.6086	-10.0235	-1.57306	541.861	106.362
2SMST112-123	0.0671143	20.4423	0.817316	28.1079	0.088127	18.4328	0.687051	0.0214675	21.5038	544.45	96.2437	606.55	129.047	841.322	425.541	429.315	91.5526	35.2863	10.2382	544.45	96.2437
2SMST112-129	0.0576954	15.7695	0.708715	22.6773	0.0889038	15.1236	0.720642	0.0217661	22.021	549.051	79.6023	543.983	95.7877	518.213	346.166	435.222	95.0389	-5.95083	-0.931592	549.051	79.6023
2SMST112-102	0.233658	11.2301	3.02381	12.8175	0.0936192	6.65419	0.483363	0.074143	14.7921	576.906	36.7212	1413.65	98.1067	3077.27	179.394	1445.64	207.434	81.2527	59.1902	576.906	36.7212
2SMST112-138	0.173819	87.3056	2.34702	104.719	0.0977481	57.7775	0.5522	0.0203975	28.8558	601.199	331.945	1226.65	952.468	2594.76	1455.82	408.131	116.926	76.8303	50.9888	601.199	331.945
2SMST112-299	0.172801	35.8288	2.36847	42.8924	0.0994301	23.5449	0.549766	0.0234669	4.77114	611.068	137.288	1233.14	316.055	2584.96	598.017	468.838	22.1236	76.3606	50.4462	611.068	137.288
2SMST112-276	0.115289	3.7965	1.65064	7.55778	0.103901	5.92601	0.868817	0.0118346	5.69699	637.227	35.9561	989.795	47.824	1884.41	68.3618	237.8	13.4725	66.1842	35.6202	637.227	35.9561
2SMST112-359	0.0780748	20.7507	1.15207	29.5738	0.106882	21.0463	0.712513	0.0246481	10.5301	654.615	131.026	778.22	162.117	1148.78	412.121	492.153	51.2631	43.0164	15.8831	654.615	131.026
2SMST112-313	0.239412	2.77577	3.69858	4.33252	0.112032	3.85213	0.776082	0.025473	3.35936	684.539	25.0176	1571.06	34.6424	3116.06	44.1819	508.418	16.8736	78.0319	56.4282	684.539	25.0176
2SMST112-318	0.0965421	3.77001	1.49726	5.72822	0.112452	4.98176	0.760732	0.0151883	6.31391	686.975	32.4633	929.274	34.8863	1558.34	70.7405	304.681	19.102	55.9164	26.0741	686.975	32.4633
2SMST112-291	0.0752411	9.28158	1.47613	13.7665	0.142338	10.0482	0.738585	0.0246622	18.3802	857.869	80.715	920.646	83.5184	1074.95	186.37	492.43	89.6142	20.1945	6.81887	857.869	80.715
2SMST112-361	0.0998328	3.96313	1.96629	6.42298	0.142652	4.7468	0.788497	0.00809377	7.94197	859.64	38.2021	1104.04	43.2577	1620.97	73.766	162.935	12.8923	46.9676	22.1368	859.64	38.2021
2SMST112-230	0.0875869	15.6125	2.9551	22.9314	0.244825	16.614	0.732479	0.0592443	18.8822	1411.73	210.714	1396.16	175.703	1373.44	300.3	1163.33	214.595	-2.78796	-1.11539	1373.44	300.3
2SMST112-260	0.0898503	4.46363	3.56702	6.03541	0.288127	5.52385	0.705112	0.395501	36.3247	1632.16	79.6539	1542.23	47.8995	1422.35	85.2833	6735.79	2195.89	-14.7511	-5.83152	1422.35	85.2833
2SMST112-036	0.0938846	3.65661	3.97902	5.59865	0.307002	4.07611	0.757836	0.934856	32.9642	1725.94	61.7224	1629.93	45.4607	1505.79	69.087	13340.7	3506.55	-14.6198	-5.89056	1505.79	69.087
2SMST112-002	0.0939966	24.77	3.92182	29.2537	0.302783	15.6233	0.532027	0.0914029	24.6917	1705.09	234.176	1618.19	241.118	1508.05	467.858	1767.84	422.346	-13.0665	-5.37026	1508.05	467.858
2SMST112-160	0.100205	6.90724	2.69027	10.6904	0.194471	8.59584	0.764275	0.0126188	15.8581	1145.55	90.2221	1325.79	79.2944	1627.89	128.451	253.458	39.9822	29.6298	13.5949	1627.89	128.451
2SMST112-322	0.100265	9.7934	2.37226	12.788	0.171535	8.43	0.643246	0.0075523	9.00877	1020.57	79.5731	1234.28	91.5904	1629	182.098	152.075	13.6533	37.35	17.315	1629	182.098
2SMST112-288	0.100998	4.32745	2.87681	7.65	0.206676	5.9757	0.825835	0.0159951	9.44883	1211.09	65.9814	1375.86	57.7025	1642.53	80.3042	320.738	30.0891	26.267	11.9759	1642.53	80.3042
2SMST112-388	0.101158	6.60714	2.70469	9.50225	0.193582	7.28855	0.72022	0.0167823	8.07476	1140.75	76.2067	1329.74	70.5538	1645.47	122.563	336.392	26.956	30.673	14.2127	1645.47	122.563
2SMST112-227	0.101573	10.9387	2.61242	18.0943	0.186627	13.8581	0.797191	0.0106869	28.7885	1103.08	140.525	1304.14	133.633	1653.06	202.718	214.86	61.6214	33.2705	15.417	1653.06	202.718
2SMST112-370	0.101988	6.49131	2.90144	10.2607	0.206016	7.89957	0.774461	0.0101473	11.5008	1207.56	86.9954	1382.29	77.632	1660.62	120.183	204.066	23.3647	27.2827	12.6405	1660.62	120.183
2SMST112-317	0.102141	18.8618	4.1941	26.9831	0.29774	19.456	0.715122	0.0690802	10.2087	1680.09	287.945	1672.87	224.837	1663.38	349.094	1350.15	133.772	-1.00451	-0.431745	1663.38	349.094
2SMST112-029	0.102377	4.87483	3.04226	7.62898	0.215332	6.08376	0.769716	0.0259758	7.86181	1257.16	69.4899	1418.29	58.3642	1667.66	90.1747	518.325	40.2718	24.615	11.3606	1667.66	90.1747
2SMST112-352	0.102848	7.5979	2.5451	11.7837	0.179275	8.79255	0.764591	0.0132176	11.7332	1063.01	86.1714	1285.03	86.1049	1676.14	140.396	265.408	30.9609	36.5798	17.2775	1676.14	140.396
2SMST112-217	0.103169	4.96921	3.28961	9.22849	0.23133	6.83484	0.849676	0.0544225	16.0934	1341.47	82.7805	1478.6	71.9803	1681.91	91.7559	1071.11	168.592	20.2413	9.27429	1681.91	91.7559
2SMST112-086	0.113162	6.63906	3.79719	7.96551	0.242739	5.22093	0.560631	0.291455	16.8643	1400.92	65.7417	1592.15	64.1055	1850.8	120.016	5169.68	784.284	24.3074	12.0108	1850.8	120.016
2SMST112-209	0.219758	11.5071	7.50742	13.3358	0.2478	7.81588	0.510971	0.318353	24.8162	1427.12	100.066	2173.87	120.049	2978.92	185.266	5586.32	1249.04	52.0927	34.3512	2978.92	185.266
2SMST112-172	0.312934	4.13595	12.0227	5.59425	0.278418	4.60086	0.686863	0.445451	10.562	1583.39	64.5945	2606.17	52.4879	3535.45	63.7455	7446.61	668.842	55.214	39.2447	3535.45	63.7455
2SMST112-253	0.58887	21.3208	34.8787	31.8278	0.42987	23.9916	0.742555	0.387532	21.5818	2305.13	465.771	3635.22	324.811	4480.77	310.273	6620.05	1256.6	48.5551	36.5889	4480.77	310.273
2SMST112-082	0.702125	6.70676	75.4428	10.8205	0.777299	9.46518	0.789373	0.370985	9.77061	3707.3	267.007	4403.25	108.847	4735.07	96.6444	6377.56	541.583	21.7056	15.8055	4735.07	96.6444
2SMST112-072	0.728011	15.86	37.0928	20.585	0.368614	14.0585	0.638994	0.0414701	7.83063	2022.87	244.206	3696.02	206.323	4787.02	228.135	821.288	63.1214	57.7425	45.2688	4787.02	228.135
2SMST112-023	0.760423	13.6996	136.425	51.2768	1.3004	49.4279	0.963649	0.999953	15.8585	5370.39	1850.41	4998.81	570.066	4849.36	196.655	14009.6	1669.75	-10.7443	-7.43332	4849.36	196.655
Primary reference material
Analysis_name	bias_corr_pleis_Pb207_Pb206	bias_corr_pleis_Pb207_Pb206_err	bias_corr_pleis_Pb207_U235	bias_corr_pleis_Pb207_U235_err	bias_corr_pleis_Pb206_U238	bias_corr_pleis_Pb206_U238_err	rho	bias_corr_pleis_Pb208_Th232	bias_corr_pleis_Pb208_Th232_err	pleis_Pb206_U238_age,	pleis_Pb206_U238_age_err	pleis_Pb207_U235_age	pleis_Pb207_U235_age_err	pleis_Pb207_Pb206_age	pleis_Pb207_Pb206_age_err	pleis_Pb208_Th232_age	pleis_Pb208_Th232_age_err	discordance_Pb206U238_Pb207Pb206	discordance_Pb206U238_Pb207U235
PLEIS-01	0.0528817	5.79639	0.399857	6.59079	0.0548878	4.20687	0.496602	0.0179026	5.82474	344.46	14.1107	341.545	19.1179	323.723	131.607	358.65	20.7168	-6.40603	-0.853674
PLEIS-02	0.0556894	9.01555	0.416602	9.33331	0.0543001	3.91632	0.289559	0.0172015	8.82235	340.868	13.0027	353.618	27.8771	440.005	200.562	344.725	30.1775	22.5309	3.6057
PLEIS-03	0.0527526	5.54672	0.400726	6.01571	0.0551355	3.8639	0.437798	0.0171591	6.6954	345.974	13.0157	342.175	17.4765	318.169	126.064	343.882	22.8424	-8.7391	-1.11033
PLEIS-04	0.0534846	4.99782	0.39969	5.9592	0.0542047	4.05582	0.558217	0.0171065	8.19506	340.284	13.4434	341.423	17.2803	349.41	112.979	342.836	27.8779	2.61177	0.333614
PLEIS-05	0.0519993	4.49402	0.389073	5.55265	0.054241	4.09604	0.602651	0.0167398	8.0126	340.506	13.5854	333.692	15.7932	285.381	102.745	335.548	26.6818	-19.3165	-2.04213
PLEIS-06	0.0541029	5.49287	0.396876	6.94919	0.0531508	5.31394	0.627682	0.0171885	8.45085	333.837	17.2884	339.38	20.0502	375.335	123.598	344.466	28.8843	11.0563	1.63333
PLEIS-07	0.0526686	3.60947	0.374438	5.81449	0.0514816	3.96481	0.791637	0.0171801	8.2567	323.611	12.5139	322.938	16.0854	314.547	82.0883	344.299	28.2067	-2.88186	-0.208655
PLEIS-08	0.053617	5.87964	0.380729	10.2332	0.0514024	10.7464	0.844018	0.0162871	12.6761	323.126	33.8688	327.574	28.6592	354.998	132.781	326.547	41.1025	8.97806	1.35799
PLEIS-09	0.0533588	5.07204	0.367462	11.0391	0.0498356	11.7092	0.902225	0.0150787	11.5305	313.512	35.8318	317.77	30.1292	344.086	114.767	302.499	34.6495	8.88548	1.33997
PLEIS-10	0.0536021	6.89139	0.377077	10.5015	0.050896	12.8357	0.844048	0.0151075	11.5022	320.02	40.0745	324.885	29.206	354.371	155.647	303.072	34.6296	9.69342	1.49749
PLEIS-11	0.0513456	6.9799	0.395398	9.0666	0.0557083	10.1802	0.742799	0.0168112	10.0268	349.473	34.6301	338.305	26.0919	256.375	160.423	336.968	33.5347	-36.3129	-3.30117
PLEIS-12	0.0535365	5.96083	0.399808	7.77447	0.0540226	6.06808	0.654277	0.0151713	15.0231	339.171	20.0492	341.509	22.5504	351.603	134.696	304.343	45.4303	3.5358	0.684617
PLEIS-13	0.0497913	6.69693	0.379939	8.35508	0.0552009	6.59334	0.621104	0.0150239	16.3621	346.373	22.235	326.993	23.3621	185.262	155.934	301.408	49.0101	-86.9639	-5.92674
PLEIS-14	0.0521063	7.85273	0.389905	12.9536	0.0541382	6.7706	0.866389	0.0151557	17.1663	339.878	22.4158	334.3	36.9134	290.078	179.381	304.033	51.867	-17.168	-1.66852
PLEIS-15	0.0522219	7.45122	0.39874	15.4158	0.0552502	9.2274	0.939454	0.0176117	31.1666	346.675	31.1444	340.734	44.6506	295.14	170.054	352.874	109.319	-17.461	-1.74347
PLEIS-16	0.0588428	8.07283	0.436499	13.3876	0.0536912	7.63534	0.843071	0.0233125	25.2191	337.143	25.0806	367.781	41.3286	561.286	175.912	465.789	116.459	39.9338	8.3304
PLEIS-17	0.0546977	5.65744	0.411774	8.8	0.0545018	5.88403	0.77304	0.016665	29.2943	342.101	19.6046	350.152	26.0677	399.886	126.748	334.061	97.2905	14.4502	2.29923
PLEIS-18	0.056086	7.56049	0.437016	10.5985	0.0564236	7.35123	0.70084	0.0225253	27.2141	353.839	25.3106	368.146	32.7386	455.774	167.73	450.235	121.538	22.3652	3.88638
PLEIS-19	0.0542073	6.52859	0.407159	7.72979	0.0544089	6.82519	0.603807	0.017895	22.2868	341.533	22.7037	346.827	22.7138	379.673	146.79	358.499	79.3491	10.0455	1.5263
PLEIS-20	0.0565925	5.78679	0.412664	6.97019	0.0528396	6.57344	0.636284	0.022566	19.8966	331.932	21.2672	350.792	20.6772	475.691	127.936	451.039	88.9431	30.2211	5.37639
PLEIS-21	0.0546763	7.22021	0.406281	5.97195	0.0538604	8.97096	0.597405	0.019079	19.9122	338.179	29.5561	346.194	17.5204	399.009	161.785	381.997	75.4908	15.2453	2.31513
PLEIS-22	0.0536797	7.61553	0.400482	7.07999	0.0540955	8.49305	0.534351	0.0172649	15.0698	339.617	28.0974	341.997	20.5602	357.635	171.902	345.983	51.7615	5.03824	0.69609
PLEIS-23	0.0544035	8.33591	0.389326	11.5343	0.0519006	10.7244	0.721777	0.0171518	12.2611	326.18	34.111	333.877	32.8308	387.791	187.157	343.737	41.8327	15.8876	2.30528
PLEIS-24	0.0517788	8.02137	0.39134	13.1139	0.0548254	11.3782	0.794489	0.0169267	17.0824	344.079	38.1241	335.348	37.4696	275.653	183.714	339.262	57.5523	-24.8231	-2.60345
PLEIS-25	0.0510272	8.5898	0.37424	13.4366	0.0532132	7.64456	0.804134	0.0151702	17.4389	334.219	24.8986	322.791	37.1706	242.058	197.94	304.32	52.7415	-38.0738	-3.5403
PLEIS-26	0.0530811	8.3479	0.403873	12.4093	0.055212	7.75929	0.750408	0.0158994	17.0562	346.441	26.172	344.453	36.2642	332.263	189.291	318.834	54.0262	-4.26716	-0.577204
PLEIS-27	0.0539904	7.37624	0.401064	7.24163	0.0539097	6.43964	0.423529	0.0188766	14.2576	338.48	21.2347	342.42	21.0516	370.65	166.115	377.982	53.4612	8.67933	1.1504
PLEIS-28	0.0554232	7.79815	0.401362	8.58052	0.0525579	9.03709	0.609232	0.0160806	13.4882	330.206	29.0898	342.635	24.9584	429.335	173.804	322.44	43.1923	23.0889	3.62743
PLEIS-29	0.0520447	7.44453	0.380861	8.80815	0.0531114	8.8547	0.644721	0.0159828	8.37459	333.595	28.7878	327.672	24.6727	287.373	170.14	320.494	26.6459	-16.0843	-1.80782
PLEIS-30	0.0515508	5.07609	0.381046	11.5638	0.053644	9.39122	0.903099	0.0158187	7.71108	336.855	30.8227	327.808	32.4077	265.534	116.472	317.229	24.2854	-26.8595	-2.76
PLEIS-31	0.0520339	5.64578	0.391765	11.5247	0.0546356	8.68642	0.881034	0.0167325	9.14062	342.919	29.0091	335.658	32.9512	286.9	129.042	335.403	30.4279	-19.5256	-2.16319
PLEIS-32	0.0527354	5.14133	0.382885	9.23395	0.0526794	7.0303	0.833811	0.0162069	6.92705	330.95	22.6797	329.159	25.9654	317.43	116.866	324.952	22.342	-4.2594	-0.544369
PLEIS-33	0.0532516	4.92777	0.404163	8.60775	0.0550559	7.64064	0.822502	0.0161234	7.606	345.488	25.7027	344.663	25.1621	339.534	111.593	323.29	24.4086	-1.75362	-0.239233
PLEIS-34	0.0531514	5.45941	0.395507	7.10949	0.0539662	6.00266	0.66515	0.0167372	8.41692	338.826	19.8134	338.384	20.4621	335.264	123.727	335.496	28.0248	-1.06249	-0.130562
PLEIS-35	0.0535274	4.54817	0.378671	6.81884	0.0512914	6.30705	0.76255	0.0156512	10.3188	322.445	19.8366	326.06	19.0192	351.218	102.782	313.895	32.1657	8.19226	1.10859
PLEIS-36	0.0523121	5.35138	0.386207	8.41781	0.0535143	6.93663	0.773567	0.0161645	15.9893	336.061	22.7142	331.595	23.8177	299.077	122.044	324.108	51.4748	-12.3662	-1.34705
PLEIS-37	0.0522083	5.34561	0.376466	8.06535	0.0522542	4.9047	0.765082	0.0151544	16.1539	328.347	15.7012	324.435	22.4018	294.545	122.012	304.006	48.8003	-11.4759	-1.20576
PLEIS-38	0.0531534	5.22722	0.38608	8.87285	0.052623	6.02724	0.820244	0.0167241	15.5521	330.606	19.4241	331.502	25.0998	335.352	118.463	335.235	51.7723	1.41524	0.270315
PLEIS-39	0.0540738	4.55963	0.389014	9.35078	0.0521073	7.40152	0.877253	0.0182045	13.7628	327.446	23.6309	333.649	26.5972	374.126	102.621	364.644	49.7964	12.477	1.85901
PLEIS-40	0.0542465	5.36957	0.391727	8.51862	0.0522929	7.64439	0.784489	0.0169843	10.4634	328.583	24.4889	335.63	24.3507	381.298	120.696	340.407	35.3509	13.8251	2.09966
PLEIS-41	0.0540423	6.09586	0.396968	7.19816	0.0531858	6.9786	0.630609	0.0169276	10.1564	334.051	22.7185	339.446	20.7721	372.813	137.228	339.282	34.2003	10.3973	1.58953
PLEIS-42	0.0546893	6.98254	0.415915	7.90688	0.055061	6.31673	0.537224	0.0187718	10.7321	345.519	21.251	353.126	23.5874	399.544	156.445	375.903	40.0092	13.5218	2.15427
PLEIS-43	0.0542024	6.54107	0.401262	6.96754	0.0536017	5.16547	0.450715	0.0171364	9.34766	336.596	16.9407	342.563	20.2617	379.467	147.076	343.431	31.8566	11.2976	1.74186
PLEIS-44	0.05267	6.69456	0.400785	7.07775	0.0550961	5.11845	0.434425	0.0169048	9.5941	345.733	17.2301	342.218	20.5648	314.609	152.249	338.828	32.2623	-9.89312	-1.02735
PLEIS-45	0.0515377	6.90209	0.396929	7.6311	0.0557655	5.61392	0.491487	0.0167211	9.8795	349.822	19.1154	339.418	22.0203	264.95	158.387	335.176	32.8674	-32.033	-3.06517
Secondary reference material
Analysis_name	bias_corr_fc5z_Pb207_Pb206	bias_corr_fc5z_Pb207_Pb206_err	bias_corr_fc5z_Pb207_U235	bias_corr_fc5z_Pb207_U235_err	bias_corr_fc5z_Pb206_U238	bias_corr_fc5z_Pb206_U238_err	rho	bias_corr_fc5z_Pb208_Th232	bias_corr_fc5z_Pb208_Th232_err	fc5z_Pb206_U238_age,	fc5z_Pb206_U238_age_err	fc5z_Pb207_U235_age	fc5z_Pb207_U235_age_err	fc5z_Pb207_Pb206_age	fc5z_Pb207_Pb206_age_err	fc5z_Pb208_Th232_age	fc5z_Pb208_Th232_age_err	discordance_Pb206U238_Pb207Pb206	discordance_Pb206U238_Pb207U235
FC5Z-1	0.0960654	4.17963	3.63751	5.4603	0.274815	3.76921	0.645072	0.0778283	5.01452	1565.2	52.3807	1557.78	43.5143	1549.05	78.5217	1514.87	73.3195	-1.04213	-0.476179
FC5Z-2	0.0951584	3.83396	3.38632	5.31697	0.257834	4.0063	0.695291	0.0760331	5.50266	1478.75	52.9405	1501.23	41.7029	1531.21	72.1959	1481.18	78.7426	3.42623	1.49784
FC5Z-3	0.0959828	7.14433	3.84834	11.6007	0.290135	9.6813	0.789168	0.0813324	10.568	1642.2	140.374	1602.92	93.7621	1547.44	134.247	1580.47	161.304	-6.12421	-2.45073
FC5Z-4	0.0952395	4.51187	3.46332	6.01991	0.263056	4.33706	0.664385	0.0710956	8.70842	1505.46	58.2305	1518.9	47.4647	1532.82	84.9434	1388.22	117.173	1.78477	0.885156
FC5Z-5	0.0931447	4.95374	3.42448	9.76448	0.26604	6.19776	0.902359	0.0769192	18.1566	1520.67	83.9609	1510.03	76.8847	1490.83	93.7798	1497.81	263.835	-2.00155	-0.704839
FC5Z-6	0.0937467	3.74341	3.43444	5.67885	0.265299	4.23138	0.752013	0.0732645	13.3892	1516.9	57.1944	1512.31	44.6876	1503.02	70.7527	1429.1	185.587	-0.92332	-0.303039
FC5Z-7	0.0956618	4.95966	3.41738	5.80598	0.25896	5.77041	0.632913	0.0803359	10.7104	1484.52	76.5183	1508.4	45.638	1541.14	93.2721	1561.84	161.623	3.67392	1.58319
FC5Z-8	0.0924152	4.69399	3.3442	7.43913	0.262504	6.22217	0.777991	0.0778439	8.96154	1502.64	83.404	1491.44	58.2117	1475.93	89.0385	1515.16	131.243	-1.80938	-0.75105
FC5Z-9	0.097848	4.65568	3.44742	5.60623	0.255691	4.53471	0.596281	0.0739744	7.79875	1467.76	59.5268	1515.28	44.153	1583.51	87.0745	1442.47	108.867	7.30997	3.13632
FC5Z-10	0.0992332	4.33086	3.62545	7.77244	0.265142	6.05512	0.832064	0.0819242	5.59225	1516.09	81.8094	1555.13	61.9346	1609.75	80.7263	1591.53	85.7703	5.81813	2.51031
FC5Z-11	0.0935943	4.20555	3.47219	6.53566	0.269108	5.20773	0.766082	0.0815052	5.48502	1536.27	71.1889	1520.92	51.5675	1499.94	79.5199	1583.7	83.7236	-2.42215	-1.00936
FC5Z-12	0.0963005	4.52988	3.55149	6.85997	0.267316	5.28801	0.751227	0.079941	9.51272	1527.16	71.9064	1538.77	54.4032	1553.64	85.0508	1554.45	142.831	1.70437	0.754273
FC5Z-13	0.0974929	4.13589	3.59895	6.94904	0.26737	5.3073	0.804636	0.0830061	7.99322	1527.44	72.1805	1549.3	55.2714	1576.71	77.4211	1611.73	124.208	3.12475	1.41096
FC5Z-14	0.0966906	4.83123	3.5449	6.75534	0.265437	5.36455	0.704652	0.0862796	6.11779	1517.6	72.5422	1537.3	53.5499	1561.23	90.6192	1672.74	98.4539	2.79459	1.28134
FC5Z-15	0.100574	5.16216	3.77036	6.7344	0.271446	5.06076	0.650147	0.0902565	6.36705	1548.14	69.6525	1586.46	54.0968	1634.72	95.9151	1746.6	106.819	5.29679	2.41548
User-defined input parameters
pleis_Pb206_U238_known	0.0536372
pleis_Pb207_Pb206_known	0.053243
pleis_Pb207_U235_known	0.394138
pleis_Pb208_Th232_known	0.0168179
pleis_Pb206_U238_known_err	1
pleis_Pb207_Pb206_known_err	0.8
pleis_Pb207_U235_known_err	1.2
pleis_Pb208_Th232_known_err	1
fc5z_Pb206_U238_known	0.185154
fc5z_Pb207_Pb206_known	0.0762119
fc5z_Pb207_U235_known	1.94561
fc5z_Pb208_Th232_known	0.0557219
fc5z_Pb206_U238_known_err	0.75
fc5z_Pb207_Pb206_known_err	0.8
fc5z_Pb207_U235_known_err	1.25
fc5z_Pb208_Th232_known_err	1
reject_poly_order	3
reject_spline_breaks	5
outlier_cutoff_68	10
outlier_cutoff_76	10
outlier_cutoff_75	10
outlier_cutoff_82	25
replace_bad_rho	0.7
BL_xmin	0
BL_xmax	7
threshold_U238	5000
add_sec	5
int_time	14
filter_unc_cutoff	15
filter_transition_68_76	1000
filter_disc_transition	600
filter_disc_young	15
filter_disc_old	20
filter_disc_rev	10
poly_order	3

## Sheet: 4SMST778
Filtered data																								Smith, T.M., Saylor, J.E., Lapen, T.J., Hatfield, K., and Sundell, K.E., 2022, Identifying sources of non-unique detrital age distributions through integrated provenance analysis: An example from the Paleozoic Central Colorado Trough: Geosphere, v. 18, https://doi.org/10.1130/GES02541.1
Analysis_name	bias_corr_samples_Pb207_Pb206	bias_corr_samples_Pb207_Pb206_err	bias_corr_samples_Pb207_U235	bias_corr_samples_Pb207_U235_err	bias_corr_samples_Pb206_U238	bias_corr_samples_Pb206_U238_err	rho	bias_corr_samples_Pb208_Th232	bias_corr_samples_Pb208_Th232_err	samples_Pb206_U238_age,	samples_Pb206_U238_age_err	samples_Pb207_U235_age	samples_Pb207_U235_age_err	samples_Pb207_Pb206_age	samples_Pb207_Pb206_age_err	samples_Pb208_Th232_age	samples_Pb208_Th232_age_err	discordance_Pb206U238_Pb207Pb206	discordance_Pb206U238_Pb207U235	best_age	best_age_err
4SMST778-026	0.0624759	3.91915	0.530149	6.96844	0.0614703	5.76764	0.826857	0.00636915	16.2245	384.561	21.5316	431.909	24.5197	690.44	83.5791	128.326	20.7651	44.3021	10.9624	384.561	21.5316
4SMST778-094	0.0673237	6.88874	0.587728	9.10985	0.0632774	6.12089	0.654586	0.0146668	5.37163	395.526	23.4821	469.416	34.2536	847.803	143.256	294.296	15.7	53.3469	15.7407	395.526	23.4821
4SMST778-148	0.059871	3.18107	0.610541	6.2807	0.0739478	5.33377	0.86235	0.0175587	7.38112	459.896	23.6754	483.902	24.1804	598.917	68.8779	351.82	25.76	23.2121	4.96084	459.896	23.6754
4SMST778-375	0.0591773	4.51559	0.607204	6.29327	0.0743381	4.45979	0.696635	0.0234712	8.06471	462.239	19.8932	481.795	24.1464	573.626	98.1917	468.922	37.4165	19.4181	4.0591	462.239	19.8932
4SMST778-378	0.0584814	4.27541	0.612707	6.08214	0.0759178	4.40321	0.711356	0.0189929	6.88848	471.711	20.0288	485.266	23.4672	547.843	93.3772	380.289	25.9679	13.8967	2.79334	471.711	20.0288
4SMST778-042	0.0604646	5.84844	0.633732	8.1485	0.0759285	5.67922	0.69632	0.0212513	8.49408	471.775	25.8363	498.418	32.1053	620.241	126.181	425.036	35.7575	23.9368	5.34554	471.775	25.8363
4SMST778-397	0.0569859	3.79229	0.605361	4.77405	0.0770813	3.1881	0.610181	0.0260834	6.60989	478.678	14.7079	480.63	18.2813	490.987	83.6383	520.446	33.9903	2.50702	0.406222	478.678	14.7079
4SMST778-213	0.0589866	5.10374	0.62982	7.5786	0.0773941	5.76192	0.739532	0.0247007	5.35224	480.549	26.6822	495.984	29.7454	566.601	111.113	493.189	26.0941	15.1873	3.11189	480.549	26.6822
4SMST778-250	0.0569591	4.60761	0.609	6.8107	0.0774464	5.05475	0.736442	0.025077	7.68675	480.863	23.4221	482.929	26.1806	489.95	101.638	500.611	38.0439	1.85473	0.427879	480.863	23.4221
4SMST778-089	0.0595188	4.98537	0.636472	6.16224	0.0775059	3.71923	0.587989	0.0234608	6.79642	481.219	17.246	500.12	24.3401	586.124	108.178	468.719	31.5141	17.8982	3.7793	481.219	17.246
4SMST778-086	0.0605052	5.89433	0.653943	8.93403	0.0783332	6.76662	0.751498	0.0181661	8.98811	486.166	31.6874	510.902	35.8821	621.69	127.14	363.882	32.4395	21.7993	4.84171	486.166	31.6874
4SMST778-036	0.0596554	4.46282	0.645883	6.02451	0.0784323	3.6061	0.676225	0.024174	8.98814	486.759	16.9067	505.942	24.0098	591.099	96.7582	482.799	42.926	17.652	3.79165	486.759	16.9067
4SMST778-341	0.0582268	4.60788	0.632318	6.44383	0.078585	4.46749	0.699063	0.0257406	8.15864	487.671	20.9831	497.539	25.351	538.305	100.802	513.692	41.4246	9.4062	1.98332	487.671	20.9831
4SMST778-382	0.0579144	4.16552	0.636889	5.42225	0.0797054	3.56711	0.640416	0.0276584	5.33297	494.364	16.9753	500.378	21.4249	526.526	91.3092	551.447	29.0318	6.1084	1.20194	494.364	16.9753
4SMST778-349	0.0577779	4.01519	0.639359	5.41374	0.0800896	3.8416	0.671831	0.0268291	5.85099	496.657	18.3632	501.909	21.4418	521.349	88.0922	535.128	30.9231	4.73616	1.04633	496.657	18.3632
4SMST778-025	0.0585964	5.29994	0.648138	6.89545	0.0801265	4.4186	0.639713	0.0269361	7.64403	496.878	21.1303	507.332	27.5406	552.133	115.669	537.235	40.5661	10.0076	2.06065	496.878	21.1303
4SMST778-032	0.0552144	6.42069	0.612676	8.19674	0.0803832	4.86228	0.622297	0.025087	7.38303	498.41	23.321	485.247	31.6297	420.916	143.316	500.809	36.5536	-18.4106	-2.71265	498.41	23.321
4SMST778-138	0.057527	7.62935	0.63778	9.62947	0.0803909	6.90025	0.618047	0.0257226	5.51241	498.455	33.0988	500.931	38.0935	511.793	167.661	513.337	27.9603	2.60612	0.494105	498.455	33.0988
4SMST778-005	0.0601593	3.45755	0.66849	4.66449	0.0804983	3.09436	0.671276	0.0262256	4.60431	499.096	14.8611	519.794	18.9782	609.309	74.7338	523.247	23.7968	18.0881	3.9819	499.096	14.8611
4SMST778-362	0.0578829	4.95859	0.643832	6.79792	0.0805378	4.85314	0.684683	0.0260211	7.57738	499.332	23.3186	504.676	27.0411	525.331	108.716	519.219	38.8795	4.949	1.05889	499.332	23.3186
4SMST778-222	0.0579533	4.84149	0.646692	7.80935	0.0808713	5.94095	0.785008	0.0258667	5.40093	501.322	28.6548	506.441	31.1506	527.997	106.1	516.176	27.5441	5.05226	1.01083	501.322	28.6548
4SMST778-291	0.0573861	4.32128	0.641741	7.03987	0.0809317	5.66223	0.789575	0.0276728	4.70104	501.681	27.3293	503.384	27.9486	506.4	95.0519	551.73	25.6025	0.93181	0.338139	501.681	27.3293
4SMST778-132	0.0603857	5.84269	0.675057	6.77967	0.081059	4.24021	0.518422	0.026947	6.51293	502.441	20.4955	523.783	27.7497	617.425	126.116	537.449	34.572	18.6232	4.07451	502.441	20.4955
4SMST778-162	0.0554592	9.20978	0.620376	10.6333	0.0811185	5.05027	0.500474	0.0283575	6.08205	502.796	24.4277	490.083	41.3596	430.781	205.215	565.191	33.9275	-16.7172	-2.59404	502.796	24.4277
4SMST778-176	0.0578443	8.38229	0.647166	12.7077	0.0811297	9.80243	0.751852	0.0251408	5.25413	502.862	47.42	506.733	50.7385	523.869	183.826	501.869	26.061	4.00994	0.763894	502.862	47.42
4SMST778-289	0.0593447	4.51081	0.666836	7.31442	0.0813241	5.96708	0.787699	0.0279429	5.63458	504.021	28.9299	518.787	29.7208	579.764	97.986	557.041	30.9821	13.0644	2.84621	504.021	28.9299
4SMST778-034	0.0580364	6.72671	0.652133	9.66086	0.0814	6.68652	0.718241	0.0257703	7.44655	504.474	32.4459	509.79	38.7389	531.135	147.335	514.276	37.8481	5.01964	1.04285	504.474	32.4459
4SMST778-399	0.0570284	6.29268	0.640079	8.90469	0.0814519	6.43813	0.707708	0.0263544	4.49596	504.783	31.259	502.355	35.3014	492.631	138.744	525.782	23.3476	-2.46688	-0.483318	504.783	31.259
4SMST778-249	0.0609334	5.35781	0.68549	8.63552	0.0814893	6.83459	0.784288	0.0254713	9.33627	505.006	33.1981	530.087	35.6756	636.883	115.275	508.384	46.9266	20.7066	4.73147	505.006	33.1981
4SMST778-321	0.0589347	5.62912	0.664952	7.76081	0.0816342	5.11614	0.689051	0.0270272	6.71257	505.87	24.8917	517.639	31.4822	564.686	122.591	539.028	35.736	10.4158	2.27353	505.87	24.8917
4SMST778-018	0.058389	8.85764	0.660703	12.6802	0.0819702	9.0715	0.71557	0.0263804	10.4129	507.872	44.3042	515.044	51.2671	544.388	193.57	526.295	54.1677	6.70764	1.39244	507.872	44.3042
4SMST778-153	0.0580713	6.92509	0.660307	10.77	0.0824553	7.87555	0.76669	0.0269331	5.20111	510.761	38.6734	514.802	43.5182	532.454	151.646	537.177	27.59	4.07412	0.78488	510.761	38.6734
4SMST778-379	0.0610505	15.8297	0.69833	18.098	0.0828897	8.81102	0.484733	0.0266754	7.19898	513.348	43.4778	537.793	75.7014	641.012	340.348	532.103	37.8416	19.9161	4.5454	513.348	43.4778
4SMST778-068	0.057808	4.05871	0.661767	6.52229	0.0829486	5.74247	0.788208	0.0260997	6.07549	513.699	28.3545	515.694	26.3793	522.492	89.0295	520.765	31.2591	1.68285	0.386951	513.699	28.3545
4SMST778-363	0.0576741	3.64735	0.66149	4.98667	0.0830487	3.67321	0.683957	0.0269572	5.16979	514.294	18.1573	515.525	20.1615	517.403	80.0761	537.651	27.4476	0.600871	0.23865	514.294	18.1573
4SMST778-157	0.0586315	3.7211	0.671869	6.17756	0.0830982	3.7804	0.826576	0.0257109	4.96889	514.589	18.6974	521.848	25.2127	553.44	81.1932	513.105	25.1904	7.01994	1.39108	514.589	18.6974
4SMST778-058	0.0665341	5.95783	0.763242	9.10701	0.0831123	6.88275	0.75632	0.0285143	7.72334	514.673	34.0468	575.879	40.048	823.225	124.375	568.273	43.3248	37.4809	10.6283	514.673	34.0468
4SMST778-313	0.0570661	5.17381	0.656018	7.63767	0.0831761	5.57749	0.735629	0.026864	7.40267	515.053	27.6095	512.175	30.7308	494.087	114.046	535.816	39.1815	-4.24321	-0.561759	515.053	27.6095
4SMST778-219	0.057064	5.39798	0.660779	8.53151	0.0839263	6.5258	0.774447	0.0255098	6.20397	519.516	32.5727	515.091	34.48	494.009	118.989	509.143	31.2167	-5.16319	-0.859101	519.516	32.5727
4SMST778-302	0.0590576	7.8628	0.685011	11.5188	0.08393	8.62147	0.730995	0.0275666	9.34121	519.538	43.035	529.799	47.5828	569.222	171.105	549.64	50.7148	8.72828	1.93669	519.538	43.035
4SMST778-234	0.0581699	3.82537	0.675193	6.81325	0.0841026	5.99649	0.829076	0.0254985	4.98498	520.564	29.9887	523.865	27.8905	536.168	83.7148	508.92	25.0684	2.91017	0.630019	520.564	29.9887
4SMST778-035	0.0614538	7.93677	0.713715	9.68013	0.084133	5.22863	0.573472	0.0260204	8.21855	520.745	26.1572	546.95	40.9574	655.155	170.245	519.205	42.1717	20.5157	4.79111	520.745	26.1572
4SMST778-130	0.0584348	8.44831	0.678785	11.5063	0.0842266	8.19598	0.679682	0.025999	20.3533	521.302	41.0444	526.04	47.2735	546.101	184.57	518.783	104.516	4.54106	0.900657	521.302	41.0444
4SMST778-218	0.0582486	3.61964	0.677088	6.2372	0.0842498	4.97377	0.814561	0.0270437	4.82279	521.44	24.9141	525.013	25.5741	539.126	79.1725	539.354	25.6842	3.28059	0.680593	521.44	24.9141
4SMST778-078	0.0583389	4.08193	0.679449	6.55823	0.0843987	5.11541	0.782693	0.0259696	4.38188	522.325	25.6654	526.442	26.9469	542.513	89.2326	518.203	22.4308	3.72116	0.781961	522.325	25.6654
4SMST778-248	0.058239	6.55809	0.68291	10.2113	0.08494	7.88081	0.766522	0.0254994	4.33304	525.542	39.7741	528.532	42.098	538.766	143.454	508.938	21.7889	2.45453	0.565757	525.542	39.7741
4SMST778-019	0.0612947	9.29775	0.724647	13.6659	0.0856415	10.0135	0.732875	0.0275635	10.7406	529.709	50.9226	553.407	58.3675	649.591	199.622	549.581	58.3169	18.4551	4.28221	529.709	50.9226
4SMST778-239	0.0655093	5.02945	0.780471	7.90688	0.0863176	6.3185	0.772092	0.0304331	5.84142	533.722	32.3652	585.752	35.2072	790.735	105.535	605.947	34.9007	32.503	8.88261	533.722	32.3652
4SMST778-261	0.0586764	4.39589	0.699742	6.34688	0.0863566	4.65069	0.721405	0.0266751	5.06427	533.953	23.832	538.637	26.5365	555.109	95.8898	532.098	26.6128	3.81113	0.869476	533.953	23.832
4SMST778-305	0.0869223	2.77935	2.89347	4.42111	0.240865	3.49803	0.7778	0.0713612	10.1933	1391.19	43.7721	1380.21	33.3733	1358.77	53.5679	1393.23	137.701	-2.38594	-0.795579	1358.77	53.5679
4SMST778-383	0.0878905	9.38961	2.85411	13.5839	0.235375	9.85048	0.722637	0.0757801	11.2006	1362.61	121.001	1369.89	102.488	1380.09	180.439	1476.42	160.106	1.26689	0.531833	1380.09	180.439
4SMST778-170	0.0879204	6.34225	2.97157	9.86033	0.245094	7.5997	0.765707	0.0719048	7.59113	1413.12	96.4445	1400.38	75.0472	1380.75	121.867	1403.48	103.188	-2.34493	-0.910171	1380.75	121.867
4SMST778-278	0.0879673	7.32826	3.07131	11.314	0.252742	8.78393	0.762016	0.0686098	4.86839	1452.6	114.253	1425.56	86.8745	1381.77	140.794	1341.25	63.2771	-5.12628	-1.89682	1381.77	140.794
4SMST778-396	0.0883499	7.66374	2.91797	10.7081	0.239635	7.59507	0.698498	0.0684619	18.6179	1384.8	94.6536	1386.58	81.1497	1390.1	147.071	1338.46	242.57	0.381723	0.128648	1390.1	147.071
4SMST778-335	0.0883676	5.56449	2.89558	8.07907	0.237098	5.70832	0.725236	0.0778627	9.31532	1371.59	70.5289	1380.76	61.0488	1390.49	106.78	1515.52	136.472	1.35894	0.664147	1390.49	106.78
4SMST778-063	0.0883681	3.28605	3.25485	6.35985	0.266876	5.76731	0.857589	0.352757	45.9113	1524.92	78.3228	1470.33	49.4386	1390.5	63.0575	6107.02	2577.42	-9.6674	-3.71282	1390.5	63.0575
4SMST778-398	0.0885614	6.61616	2.94616	9.67267	0.241403	7.1792	0.729587	0.0735394	8.64866	1393.99	90.002	1393.86	73.4539	1394.69	126.887	1434.28	120.103	0.0504561	-0.00905574	1394.69	126.887
4SMST778-177	0.0885691	3.3604	2.85957	5.04578	0.234122	4.3625	0.754104	0.0406405	13.1246	1356.07	53.3516	1371.33	37.9772	1394.86	64.4458	805.182	103.866	2.78109	1.11325	1394.86	64.4458
4SMST778-353	0.0886498	10.666	2.79999	16.2947	0.228623	12.4027	0.756023	0.06732	5.13064	1327.28	148.804	1355.54	122.504	1396.6	204.503	1316.84	65.5147	4.96409	2.0848	1396.6	204.503
4SMST778-152	0.0886666	7.43864	2.91911	11.6914	0.238739	8.68006	0.772054	0.0694964	6.97835	1380.14	107.851	1386.88	88.6466	1396.97	142.617	1358.02	91.8622	1.20455	0.485709	1396.97	142.617
4SMST778-209	0.088681	7.50638	2.84498	11.3649	0.232554	8.58918	0.750854	0.0665307	7.63196	1347.87	104.478	1367.48	85.5871	1397.28	143.91	1301.89	96.4572	3.53598	1.43429	1397.28	143.91
4SMST778-325	0.0886871	4.91756	2.97017	7.37127	0.242313	5.25108	0.74569	0.0775734	6.00473	1398.71	66.028	1400.02	56.0512	1397.41	94.2759	1510.09	87.5617	-0.0930637	0.0934457	1397.41	94.2759
4SMST778-230	0.0887877	7.74606	2.91236	12.2096	0.237694	9.65634	0.77319	0.0698059	4.00341	1374.7	119.56	1385.13	92.5421	1399.58	148.458	1363.87	52.8687	1.77816	0.752905	1399.58	148.458
4SMST778-146	0.0888615	5.97213	3.0756	8.97031	0.25098	6.62731	0.746197	0.0753774	9.19285	1443.53	85.7177	1426.63	68.8399	1401.18	114.435	1468.86	130.662	-3.02268	-1.18456	1401.18	114.435
4SMST778-265	0.0888896	6.85462	3.01304	9.94786	0.24544	7.21708	0.72471	0.0728943	6.39703	1414.91	91.6918	1410.92	75.9802	1401.78	131.333	1422.13	88.0389	-0.936756	-0.282778	1401.78	131.333
4SMST778-318	0.0889131	5.94888	2.971	8.76007	0.241764	6.41633	0.734056	0.0729287	8.26148	1395.86	80.5342	1400.23	66.6444	1402.29	113.972	1422.78	113.821	0.458183	0.312055	1402.29	113.972
4SMST778-183	0.0889261	3.38849	2.91354	5.1086	0.237572	4.5503	0.759737	0.0712925	4.81214	1374.06	56.3111	1385.43	38.636	1402.57	64.9159	1391.93	64.8313	2.03246	0.820715	1402.57	64.9159
4SMST778-149	0.0889526	3.35907	2.9418	5.33259	0.239818	4.03415	0.776935	0.0695459	8.61435	1385.75	50.3041	1392.74	40.4312	1403.14	64.3472	1358.95	113.535	1.23914	0.501516	1403.14	64.3472
4SMST778-091	0.0889628	3.87545	2.92212	5.7203	0.238076	4.49345	0.737122	0.0712287	4.54167	1376.69	55.7028	1387.65	43.3001	1403.36	74.237	1390.73	61.1307	1.90063	0.790429	1403.36	74.237
4SMST778-390	0.0890253	3.1235	2.86438	4.55405	0.233295	3.43109	0.728159	0.0700217	5.98483	1351.74	41.8403	1372.59	34.2881	1404.7	59.8219	1367.94	79.3155	3.7702	1.51904	1404.7	59.8219
4SMST778-168	0.0890642	5.5236	2.85195	8.83455	0.232207	6.99386	0.780522	0.0694696	6.48353	1346.06	84.9674	1369.33	66.5114	1405.54	105.777	1357.51	85.3038	4.23211	1.69926	1405.54	105.777
4SMST778-259	0.0890834	5.79684	3.00706	8.48079	0.24446	6.40897	0.730366	0.0669265	17.9285	1409.84	81.1626	1409.41	64.7097	1405.95	111.003	1309.39	228.599	-0.27639	-0.0305017	1405.95	111.003
4SMST778-027	0.0891889	4.96139	2.74471	6.30447	0.222929	3.89835	0.617001	1.3848	115.168	1297.33	45.8112	1340.65	46.9533	1408.22	94.9759	17566.7	17566.7	7.87437	3.23142	1408.22	94.9759
4SMST778-319	0.0892687	9.76563	2.91589	14.2584	0.236334	10.3805	0.728635	0.0754778	9.61077	1367.61	127.933	1386.04	108.214	1409.93	186.9	1470.74	136.792	3.00156	1.32973	1409.93	186.9
4SMST778-113	0.0892688	8.26269	2.95521	12.0024	0.239997	8.37731	0.72585	0.0680374	8.95814	1386.68	104.531	1396.19	91.3033	1409.93	158.136	1330.43	115.674	1.64896	0.680543	1409.93	158.136
4SMST778-196	0.0892882	8.35941	2.88049	12.3053	0.233895	8.93024	0.733873	0.0639843	10.4295	1354.88	109.135	1376.82	93.0064	1410.35	159.978	1253.58	127.169	3.93318	1.59364	1410.35	159.978
4SMST778-144	0.0892886	13.3524	2.9889	19.0704	0.242737	13.9315	0.714171	0.0747384	19.3986	1400.91	175.461	1404.8	146.093	1410.36	255.53	1456.84	274.518	0.669774	0.276598	1410.36	255.53
4SMST778-050	0.089301	12.1417	3.04555	18.1887	0.247075	13.5328	0.744573	0.0679167	6.5029	1423.37	172.88	1419.12	139.912	1410.62	232.352	1328.14	83.7646	-0.9039	-0.299956	1410.62	232.352
4SMST778-040	0.0894577	8.14735	2.70971	12.0245	0.219432	8.84704	0.735468	0.0654179	9.01906	1278.87	102.635	1331.12	89.4133	1413.98	155.842	1280.79	112.243	9.5549	3.92488	1413.98	155.842
4SMST778-217	0.0894828	8.73272	2.98742	13.2871	0.24198	9.96107	0.753696	0.0732829	10.2093	1396.98	125.125	1404.42	101.415	1414.51	167.027	1429.45	141.389	1.23957	0.529782	1414.51	167.027
4SMST778-388	0.0895055	7.15222	2.86626	10.2961	0.232171	7.45956	0.719364	0.0702839	6.70309	1345.87	90.6143	1373.09	77.6557	1415	136.789	1372.89	89.1669	4.88577	1.98256	1415	136.789
4SMST778-109	0.0895497	6.90392	2.99439	9.99515	0.242407	6.45085	0.727794	0.0717484	7.19427	1399.2	81.1409	1406.19	76.224	1415.94	132.023	1400.53	97.5816	1.18262	0.497409	1415.94	132.023
4SMST778-345	0.0895928	2.82642	2.61707	4.43693	0.2114	3.64264	0.772377	0.0653332	5.36762	1236.27	40.9786	1305.44	32.6077	1416.86	54.0425	1279.18	66.6438	12.746	5.29873	1416.86	54.0425
4SMST778-012	0.0896185	3.74231	2.7625	5.46638	0.223301	4.01601	0.728938	0.0605065	4.8298	1299.29	47.2583	1345.47	40.7746	1417.41	71.5494	1187.4	55.7739	8.33348	3.43195	1417.41	71.5494
4SMST778-017	0.0896211	4.75021	2.85575	7.00965	0.230829	5.15105	0.735369	0.0677288	6.91584	1338.84	62.2761	1370.33	52.7629	1417.47	90.8189	1324.58	88.864	5.54676	2.29737	1417.47	90.8189
4SMST778-352	0.0896268	4.2483	3.06452	6.91078	0.247488	5.63772	0.789183	0.0746511	10.6027	1425.51	72.1038	1423.87	52.9546	1417.59	81.2215	1455.2	149.418	-0.558612	-0.115303	1417.59	81.2215
4SMST778-308	0.0896512	3.66333	2.76806	5.43241	0.223407	4.06275	0.738474	0.0729072	5.17091	1299.85	47.8268	1346.97	40.5425	1418.11	70.0328	1422.38	71.1466	8.33928	3.498	1418.11	70.0328
4SMST778-106	0.0896515	4.99472	2.90121	7.0257	0.234591	3.7132	0.732163	0.057472	4.37472	1358.51	45.4843	1382.23	53.1	1418.12	95.4852	1129.48	48.1137	4.20291	1.71555	1418.12	95.4852
4SMST778-347	0.0896544	4.62644	2.70053	6.72302	0.217999	5.03649	0.72594	0.068368	6.54196	1271.29	58.1119	1328.6	49.8573	1418.18	88.444	1336.68	84.7939	10.3574	4.31372	1418.18	88.444
4SMST778-041	0.0896818	11.8585	2.97864	17.4214	0.24061	12.7648	0.732575	0.0597875	9.98118	1389.87	159.625	1402.18	133.192	1418.76	226.682	1173.69	114.133	2.03669	0.878458	1418.76	226.682
4SMST778-118	0.0897099	6.13589	3.16248	8.19063	0.255581	4.94892	0.665219	0.0735672	4.61576	1467.19	64.9422	1448.05	63.268	1419.36	117.281	1434.8	64.0325	-3.36989	-1.32201	1419.36	117.281
4SMST778-165	0.089712	12.468	3.17278	18.2656	0.256464	13.3998	0.7308	0.0656609	3.32029	1471.73	176.36	1450.56	141.936	1419.41	238.312	1285.4	41.3926	-3.68606	-1.45941	1419.41	238.312
4SMST778-210	0.0897147	4.15577	2.91046	7.12922	0.235163	5.94711	0.81281	0.0604682	11.1311	1361.5	72.994	1384.63	53.9279	1419.46	79.4323	1186.67	128.696	4.08339	1.67055	1419.46	79.4323
4SMST778-207	0.0897797	3.79938	3.05137	6.6722	0.24638	5.57145	0.822137	0.0771991	5.25789	1419.78	71.0002	1420.58	51.069	1420.85	72.6067	1503.07	76.3065	0.0751055	0.0560463	1420.85	72.6067
4SMST778-381	0.0898116	4.4541	2.84837	6.44745	0.229855	4.73346	0.723101	0.0726772	4.71392	1333.74	57.0306	1368.38	48.4917	1421.53	85.1106	1418.04	64.6576	6.17559	2.5316	1421.53	85.1106
4SMST778-031	0.0898195	4.67557	2.90993	7.10804	0.234692	5.1326	0.753875	0.0692618	5.72443	1359.04	62.894	1384.5	53.7649	1421.7	89.3406	1353.58	75.0867	4.40688	1.83842	1421.7	89.3406
4SMST778-380	0.0898278	4.42437	3.04991	6.69366	0.246051	5.0897	0.75047	0.0785589	3.71598	1418.08	64.7911	1420.21	51.2276	1421.87	84.5385	1528.57	54.7807	0.266612	0.150108	1421.87	84.5385
4SMST778-235	0.089848	7.7145	2.95207	11.6548	0.238063	8.88933	0.74969	0.0733711	6.0231	1376.62	110.199	1395.38	88.621	1422.3	147.396	1431.11	83.3882	3.21168	1.34446	1422.3	147.396
4SMST778-189	0.0898693	10.5676	3.27588	15.0181	0.264303	11.001	0.710867	0.0808331	7.24281	1511.82	148.279	1475.34	117.347	1422.75	201.896	1571.14	109.782	-6.26013	-2.47258	1422.75	201.896
4SMST778-009	0.0898911	4.1022	2.888	5.91982	0.232739	4.24127	0.72099	0.0701557	5.5657	1348.84	51.6205	1378.78	44.6776	1423.22	78.3685	1370.47	73.8829	5.22596	2.17173	1423.22	78.3685
4SMST778-100	0.0899272	5.40172	3.02673	7.77929	0.243974	4.94312	0.725194	0.0670255	10.5762	1407.33	62.4979	1414.38	59.4411	1423.98	103.184	1311.27	134.728	1.16988	0.498893	1423.98	103.184
4SMST778-066	0.0899523	10.1695	2.83211	15.2723	0.228129	11.6933	0.746311	0.0664986	11.6207	1324.69	140.042	1364.08	115.096	1424.52	194.243	1301.28	146.986	7.00801	2.88793	1424.52	194.243
4SMST778-081	0.090006	10.7359	3.18983	15.6111	0.256846	11.374	0.72599	0.0770557	10.8203	1473.69	149.866	1454.7	121.253	1425.66	205.031	1500.38	157.074	-3.36896	-1.3054	1425.66	205.031
4SMST778-253	0.090008	4.70918	2.72002	8.3011	0.218879	6.86489	0.823521	0.0519133	9.08327	1275.95	79.4726	1333.94	61.7059	1425.7	89.9339	1022.95	90.8092	10.5037	4.34731	1425.7	89.9339
4SMST778-206	0.0900124	4.90551	3.04932	8.16704	0.245581	6.60263	0.799564	0.0687307	7.45242	1415.65	83.9233	1420.06	62.5265	1425.79	93.6822	1343.54	97.104	0.711656	0.311102	1425.79	93.6822
4SMST778-292	0.0900568	2.62898	2.9211	5.20341	0.234741	4.61937	0.863324	0.070034	3.51756	1359.3	56.6142	1387.39	39.3799	1426.74	50.2	1368.17	46.5873	4.72657	2.02475	1426.74	50.2
4SMST778-008	0.0900791	3.77282	2.94582	5.55758	0.236904	4.05275	0.734286	0.0694985	7.60575	1370.58	50.0395	1393.77	42.1536	1427.21	72.0369	1358.06	100.144	3.96768	1.66391	1427.21	72.0369
4SMST778-252	0.0900995	13.3786	3.30615	19.4875	0.265778	14.1835	0.727109	3.7117	114.906	1519.34	192.039	1482.5	153.071	1427.64	255.432	31329.9	31329.9	-6.42288	-2.48452	1427.64	255.432
4SMST778-300	0.0901164	7.44264	3.05694	11.0407	0.245469	8.36505	0.738868	0.0731975	7.76866	1415.07	106.29	1421.97	84.6678	1428	142.092	1427.84	107.382	0.905345	0.48544	1428	142.092
4SMST778-270	0.0901417	4.68904	2.95355	7.21265	0.237232	5.59806	0.760008	0.0690781	8.86273	1372.29	69.1982	1395.76	54.765	1428.53	89.5149	1350.11	116.08	3.93697	1.68142	1428.53	89.5149
4SMST778-169	0.0901518	4.64192	2.9326	7.35449	0.235893	5.82374	0.775811	0.0717242	4.16618	1365.31	71.6593	1390.37	55.7431	1428.75	88.6128	1400.08	56.4341	4.43997	1.80201	1428.75	88.6128
4SMST778-245	0.0902464	7.9814	2.93124	12.2473	0.235292	9.3348	0.758496	0.0703695	7.54472	1362.18	114.632	1390.01	92.9828	1430.75	152.321	1374.51	100.505	4.79277	2.00269	1430.75	152.321
4SMST778-188	0.0902941	5.13426	2.93933	6.8926	0.236035	5.31997	0.674278	0.070485	7.96771	1366.05	65.492	1392.1	52.2664	1431.76	97.9714	1376.69	106.318	4.58911	1.87108	1431.76	97.9714
4SMST778-007	0.090321	4.45679	2.92497	6.35453	0.234599	4.50435	0.712821	0.0281253	7.33899	1358.55	55.1773	1388.39	48.1197	1432.33	85.0375	560.628	40.6199	5.15039	2.14918	1432.33	85.0375
4SMST778-004	0.0903521	8.02664	2.68058	11.847	0.214924	8.70039	0.735501	0.0277875	12.1847	1255	99.2266	1323.11	87.8279	1432.98	153.138	553.986	66.6948	12.4204	5.14804	1432.98	153.138
4SMST778-043	0.0903736	6.47896	2.90448	9.43296	0.232825	6.8603	0.726807	0.0710341	6.23904	1349.29	83.5243	1383.08	71.367	1433.44	123.603	1387.06	83.81	5.87051	2.44324	1433.44	123.603
4SMST778-271	0.0904139	8.8737	3.00821	13.1789	0.240882	9.81038	0.739362	0.0662927	4.83959	1391.28	122.781	1409.7	100.76	1434.29	169.269	1297.38	60.9069	2.99831	1.30663	1434.29	169.269
4SMST778-266	0.0904316	6.96193	3.15033	9.78553	0.252243	6.88478	0.702735	0.0667496	10.654	1450.04	89.4062	1445.08	75.5594	1434.66	132.795	1306.04	135.196	-1.07165	-0.342804	1434.66	132.795
4SMST778-365	0.09048	10.1476	2.81786	15.0414	0.22552	11.115	0.73814	0.0593454	6.89982	1310.98	131.872	1360.3	113.191	1435.68	193.534	1165.26	78.2784	8.68609	3.62579	1435.68	193.534
4SMST778-174	0.0904938	4.16433	2.94855	6.55414	0.236276	5.13505	0.772285	0.0624118	4.05537	1367.31	63.2674	1394.48	49.7352	1435.97	79.4181	1223.68	48.2099	4.78184	1.94835	1435.97	79.4181
4SMST778-276	0.0905057	5.03623	3.0924	8.37087	0.247348	6.89658	0.799152	0.0698129	4.5064	1424.78	88.1657	1430.81	64.313	1436.22	96.0428	1364	59.5266	0.796375	0.420938	1436.22	96.0428
4SMST778-102	0.0905095	4.27055	2.76884	6.69107	0.221756	4.43039	0.77859	0.0267211	6.99815	1291.15	51.8396	1347.18	49.9535	1436.3	81.4402	533.003	36.8464	10.1061	4.15887	1436.3	81.4402
4SMST778-072	0.0905233	9.70659	3.12906	14.4727	0.250476	11.0083	0.741979	0.00917919	20.4126	1440.93	142.168	1439.86	111.813	1436.59	185.099	184.686	37.5622	-0.302097	-0.0742601	1436.59	185.099
4SMST778-400	0.0905318	6.25142	3.03994	9.11304	0.243696	6.76173	0.727753	0.0364184	12.8648	1405.88	85.4154	1417.71	69.7373	1436.77	119.208	723.01	91.5773	2.14987	0.833952	1436.77	119.208
4SMST778-082	0.0906389	5.87666	2.97262	8.4304	0.237688	6.1203	0.717049	0.0717273	4.85445	1374.67	75.7717	1400.65	64.1383	1439.03	112.028	1400.13	65.775	4.47264	1.85495	1439.03	112.028
4SMST778-051	0.0906526	8.78395	2.7738	13.525	0.221676	10.2712	0.760398	0.0544835	12.1342	1290.73	120.158	1348.51	101.275	1439.31	167.443	1072.28	127.12	10.3235	4.28513	1439.31	167.443
4SMST778-021	0.0906724	3.60079	2.99491	5.70861	0.23927	4.43024	0.775974	0.0725336	5.39924	1382.9	55.1415	1406.33	43.4813	1439.73	68.636	1415.33	73.9383	3.94734	1.66577	1439.73	68.636
4SMST778-013	0.0908934	4.08738	3.10653	5.7985	0.247586	4.21243	0.709507	0.0754872	5.99339	1426.02	53.891	1434.31	44.5681	1444.37	77.8622	1470.92	85.2059	1.2708	0.578119	1444.37	77.8622
4SMST778-229	0.0909191	3.00758	3.24763	5.49703	0.258848	4.68733	0.837193	8.95468	78.1052	1483.94	62.1339	1468.61	42.7006	1444.91	57.2885	46448.6	24510.3	-2.70162	-1.04399	1444.91	57.2885
4SMST778-204	0.0909388	6.17703	2.77014	10.1708	0.220832	8.01673	0.794476	0.0403004	9.9795	1286.27	93.4872	1347.53	76.0222	1445.32	117.654	798.575	78.2915	11.0046	4.54592	1445.32	117.654
4SMST778-033	0.0910057	4.10032	2.87578	6.16533	0.228916	4.34501	0.748043	0.0734837	5.40967	1328.81	52.1761	1375.59	46.4822	1446.72	78.0841	1433.23	74.987	8.15002	3.40034	1446.72	78.0841
4SMST778-088	0.0911167	8.89618	3.11414	12.4364	0.247712	8.73132	0.698792	0.0724601	9.29728	1426.66	111.757	1436.19	95.8677	1449.04	169.361	1413.95	127.367	1.54448	0.663276	1449.04	169.361
4SMST778-186	0.0911617	7.223	2.9217	10.0791	0.232391	7.52138	0.699046	0.0635806	10.6429	1347.02	91.4357	1387.55	76.3891	1449.98	137.49	1245.9	129.007	7.10104	2.92089	1449.98	137.49
4SMST778-090	0.0911818	3.34517	3.07418	4.72017	0.244362	3.68485	0.709129	0.0740835	4.33005	1409.33	46.648	1426.28	36.1793	1450.4	63.6719	1444.52	60.4561	2.83153	1.18792	1450.4	63.6719
4SMST778-054	0.0912788	13.4174	3.38653	20.6239	0.268794	15.654	0.759442	0.0714687	5.52167	1534.68	213.86	1501.28	163.059	1452.43	255.316	1395.26	74.58	-5.66294	-2.22418	1452.43	255.316
4SMST778-263	0.0913031	9.36988	3.01037	13.4023	0.238748	9.61755	0.715005	0.0693749	9.28626	1380.19	119.506	1410.25	102.498	1452.93	178.285	1355.72	122.135	5.00685	2.13172	1452.93	178.285
4SMST778-127	0.0913339	7.36563	2.8993	9.33575	0.230167	6.36732	0.617781	0.0688608	8.8019	1335.37	76.8023	1381.73	70.5967	1453.57	140.137	1346	114.941	8.1317	3.35499	1453.57	140.137
4SMST778-126	0.0915495	8.02647	3.07917	10.3777	0.243869	7.13529	0.635976	0.0741829	5.63056	1406.78	90.1862	1427.52	79.7049	1458.06	152.614	1446.39	78.7475	3.51697	1.45293	1458.06	152.614
4SMST778-361	0.0916338	4.34858	3.02165	6.26736	0.238755	4.72213	0.720861	0.0718175	6.51328	1380.22	58.6725	1413.1	47.8493	1459.81	82.6641	1401.84	88.4042	5.45197	2.3268	1459.81	82.6641
4SMST778-351	0.0916899	8.25506	2.93726	12.2995	0.231869	9.23069	0.741361	0.0538849	15.4228	1344.29	112.014	1391.57	93.4309	1460.97	156.9	1060.8	160.018	7.98684	3.39779	1460.97	156.9
4SMST778-391	0.0920598	6.33804	3.05059	9.07628	0.240341	6.55724	0.715828	0.0717388	3.83175	1388.47	81.9124	1420.38	69.5154	1468.62	120.341	1400.35	51.908	5.45759	2.24665	1468.62	120.341
4SMST778-171	0.0922028	4.37315	3.12993	7.55988	0.246163	6.22743	0.815744	0.0821211	13.8177	1418.66	79.3043	1440.08	58.2388	1471.57	83.0009	1595.21	213.067	3.5954	1.48744	1471.57	83.0009
4SMST778-070	0.092465	4.86965	2.57346	7.73087	0.201668	6.48037	0.77894	0.040275	5.39139	1184.28	70.1114	1293.12	56.5895	1476.95	92.358	798.082	42.2334	19.8163	8.41744	1476.95	92.358
4SMST778-093	0.0926729	3.43734	2.88875	4.85024	0.225939	3.76801	0.708793	0.0559907	3.8746	1313.18	44.7671	1378.98	36.6	1481.21	65.1558	1101.15	41.5665	11.3443	4.77169	1481.21	65.1558
4SMST778-329	0.0926804	5.82677	3.23965	8.63852	0.252914	6.17199	0.738662	0.0857519	13.2788	1453.48	80.3189	1466.7	67.1227	1481.37	110.446	1662.91	213.094	1.8821	0.901152	1481.37	110.446
4SMST778-137	0.0927706	5.64632	2.80743	5.96893	0.219434	4.10377	0.420249	0.0743214	4.08369	1278.88	47.6052	1357.52	44.7181	1483.21	106.999	1449	57.1821	13.7758	5.79261	1483.21	106.999
4SMST778-052	0.0928062	8.47561	2.91992	12.3632	0.22794	8.98562	0.728025	0.0701492	11.2576	1323.7	107.535	1387.09	93.7749	1483.94	160.6	1370.35	149.708	10.7984	4.57009	1483.94	160.6
4SMST778-079	0.0933464	6.30962	3.27323	8.63561	0.254109	5.88061	0.682753	0.0669955	11.7121	1459.63	76.8151	1474.71	67.2632	1494.93	119.383	1310.7	149.188	2.3608	1.02241	1494.93	119.383
4SMST778-310	0.0936348	10.0284	2.86876	14.2473	0.221681	10.0975	0.710323	0.0182756	13.7619	1290.75	118.128	1373.75	107.673	1500.76	189.599	366.056	49.9847	13.9934	6.04153	1500.76	189.599
4SMST778-287	0.0939366	3.16947	3.03893	5.89109	0.234142	5.20693	0.843885	0.0759588	4.29433	1356.17	63.6838	1417.45	45.0365	1506.84	59.8747	1479.78	61.3693	9.99896	4.32346	1506.84	59.8747
4SMST778-028	0.0944556	5.90412	2.7648	8.3276	0.21204	5.87848	0.705227	0.0523117	9.92384	1239.68	66.2979	1346.09	62.1747	1517.24	111.382	1030.61	99.9589	18.294	7.9052	1517.24	111.382
4SMST778-354	0.0945294	5.02101	3.02235	7.07974	0.231434	5.19473	0.705562	0.069296	5.41726	1342.01	62.9377	1413.28	54.0657	1518.71	94.704	1354.23	71.0833	11.635	5.04261	1518.71	94.704
4SMST778-199	0.0945326	11.5079	2.88908	17.0723	0.221572	12.5396	0.738682	0.0253867	18.654	1290.18	146.647	1379.07	129.473	1518.78	217.055	506.717	93.5645	15.0516	6.44558	1518.78	217.055
4SMST778-016	0.0945639	12.9812	3.03168	19.1506	0.232241	14.0783	0.735203	0.0319095	11.3613	1346.23	171.085	1415.63	147.245	1519.4	244.823	634.885	71.1353	11.3971	4.90204	1519.4	244.823
4SMST778-327	0.0949692	10.9354	2.83503	16.6244	0.21599	12.418	0.753222	0.0344541	11.8991	1260.65	142.215	1364.86	125.42	1527.46	206.023	684.666	80.2641	17.4676	7.6348	1527.46	206.023
4SMST778-323	0.0951146	4.5642	3.19138	6.80502	0.242765	4.80708	0.742602	0.0799623	5.72243	1401.05	60.5354	1455.08	52.6587	1530.35	85.9565	1554.85	85.8208	8.4485	3.71262	1530.35	85.9565
4SMST778-125	0.0953626	6.02065	3.60464	6.95229	0.274069	4.44131	0.515126	0.07079	7.059	1561.43	61.59	1550.56	55.3163	1535.25	113.313	1382.45	94.5454	-1.70515	-0.700977	1535.25	113.313
4SMST778-164	0.0956598	3.27006	3.25856	5.95037	0.247021	5.1077	0.835764	0.0776776	4.29937	1423.1	65.2258	1471.22	46.2634	1541.1	61.4975	1512.04	62.7336	7.65714	3.27101	1541.1	61.4975
4SMST778-159	0.0958731	6.5974	3.06969	10.3154	0.232186	7.27037	0.771636	0.0923258	16.0936	1345.95	88.3206	1425.16	79.1643	1545.29	124.004	1784.93	276.827	12.8998	5.55809	1545.29	124.004
4SMST778-069	0.0960379	4.43074	3.27891	7.44736	0.24739	6.53762	0.806894	0.0830649	7.80015	1425	83.5877	1476.06	58.0097	1548.51	83.2451	1612.83	121.278	7.97609	3.45914	1548.51	83.2451
4SMST778-262	0.0961298	7.56941	3.23565	10.9639	0.243735	7.97372	0.723442	0.0581939	7.08242	1406.08	100.74	1465.74	85.242	1550.31	142.181	1143.28	78.8779	9.30313	4.07029	1550.31	142.181
4SMST778-002	0.0967051	12.4798	2.87929	17.889	0.215693	12.8079	0.716463	0.0207128	16.7623	1259.08	146.515	1376.51	135.619	1561.51	234.074	414.375	68.8686	19.368	8.53111	1561.51	234.074
4SMST778-184	0.0968892	9.22906	3.56481	14.0195	0.266785	10.8869	0.753118	0.084431	14.329	1524.46	147.829	1541.73	111.614	1565.07	173.023	1638.31	226.759	2.59476	1.1202	1565.07	173.023
4SMST778-112	0.097053	4.94118	3.56353	6.9563	0.266186	4.28575	0.710136	0.0799101	39.4577	1521.42	58.0825	1541.45	55.2097	1568.24	92.5972	1553.87	598.934	2.98581	1.29965	1568.24	92.5972
4SMST778-059	0.0975227	9.09909	3.62798	14.5354	0.269531	11.3321	0.779829	0.0825247	11.8132	1538.42	155.123	1555.69	116.204	1577.28	170.316	1602.75	182.849	2.46377	1.10998	1577.28	170.316
4SMST778-141	0.0978804	5.59656	3.81108	7.65408	0.282336	5.99628	0.688718	0.0789358	20.6464	1603.12	85.1119	1595.09	61.6398	1584.13	104.663	1535.63	307.636	-1.19878	-0.50355	1584.13	104.663
4SMST778-256	0.0981174	9.33262	3.35488	13.3295	0.247637	9.66086	0.714078	0.0179393	15.1795	1426.28	123.628	1493.93	104.635	1588.65	174.431	359.38	54.1424	10.2205	4.52838	1588.65	174.431
4SMST778-104	0.098143	5.14773	3.37899	7.25225	0.249579	3.93328	0.728598	0.0773038	4.56292	1436.3	50.6437	1499.54	56.8814	1589.14	96.2075	1505.03	66.2875	9.61741	4.21685	1589.14	96.2075
4SMST778-067	0.0983283	8.92399	3.36272	13.2735	0.2478	10.1713	0.740704	0.0521819	7.7911	1427.12	130.23	1495.76	104.248	1592.66	166.707	1028.12	78.2497	10.394	4.58879	1592.66	166.707
4SMST778-241	0.0983715	4.44668	3.87993	7.60613	0.285739	6.22305	0.811337	2.14645	37.6615	1620.2	89.1591	1609.52	61.48	1593.48	83.0589	23168.8	6002.05	-1.67676	-0.663841	1593.48	83.0589
4SMST778-049	0.0985747	11.339	3.80668	16.3403	0.279766	11.8051	0.720049	0.0731238	19.1257	1590.19	166.399	1594.16	132.14	1597.33	211.694	1426.45	265.147	0.447503	0.249203	1597.33	211.694
4SMST778-247	0.0990324	10.3688	3.74873	15.5048	0.274206	11.5643	0.743494	0.0401224	14.1427	1562.12	160.459	1581.84	124.907	1605.98	193.366	795.117	110.57	2.73103	1.24694	1605.98	193.366
4SMST778-134	0.0992645	6.32478	3.71075	7.27392	0.271061	5.09909	0.524499	0.0876254	5.78379	1546.19	70.1019	1573.69	58.2433	1610.34	117.884	1697.76	94.4043	3.98374	1.74757	1610.34	117.884
4SMST778-214	0.0993182	5.18725	3.07839	8.42415	0.224664	6.55715	0.787992	0.0207741	12.2309	1306.47	77.5482	1427.33	64.6513	1611.35	96.6696	415.588	50.3741	18.9203	8.46704	1611.35	96.6696
4SMST778-045	0.0994138	5.75005	3.30488	8.66676	0.240832	6.55578	0.748256	0.0330461	17.7516	1391.02	82.029	1482.2	67.6586	1613.14	107.133	657.137	115.103	13.7693	6.15184	1613.14	107.133
4SMST778-285	0.0994198	3.08386	3.66007	6.15284	0.266462	5.54977	0.866071	0.0829093	5.50142	1522.82	75.2759	1562.71	49.1067	1613.25	57.4568	1609.93	85.3133	5.60579	2.55254	1613.25	57.4568
4SMST778-283	0.0994359	8.56982	3.5489	14.7388	0.258334	12.0569	0.813596	0.0344079	19.346	1481.31	159.598	1538.19	117.275	1613.55	159.662	683.763	130.489	8.19571	3.69766	1613.55	159.662
4SMST778-303	0.0994765	13.5013	3.50612	21.2665	0.255034	16.5363	0.772642	0.0118176	24.7755	1464.39	216.702	1528.59	169.575	1614.31	251.514	237.459	58.5722	9.28746	4.20054	1614.31	251.514
4SMST778-047	0.0995546	4.78128	3.6989	7.64208	0.269167	6.03899	0.780168	0.0824064	6.74422	1536.57	82.5675	1571.13	61.1565	1615.77	89.0533	1600.54	104.048	4.90184	2.1996	1615.77	89.0533
4SMST778-337	0.0996208	3.95978	3.51983	6.82675	0.255665	5.40386	0.814923	0.0369824	18.8207	1467.63	70.9314	1531.68	54.0323	1617.01	73.741	734.007	136.124	9.23833	4.18186	1617.01	73.741
4SMST778-195	0.0996595	13.7351	4.18562	20.5526	0.304504	15.2304	0.743907	0.083206	5.1512	1713.6	229.277	1671.21	170.015	1617.74	255.758	1615.47	80.1359	-5.92605	-2.53686	1617.74	255.758
4SMST778-279	0.0997178	14.5339	3.90892	22.4241	0.283761	17.1599	0.761532	0.0434738	16.9027	1610.28	244.63	1615.53	183.273	1618.83	270.595	860.139	142.84	0.528135	0.325192	1618.83	270.595
4SMST778-332	0.0997375	8.31954	3.72935	13.0259	0.270551	9.94609	0.769485	0.0607322	9.2914	1543.6	136.55	1577.69	104.666	1619.19	154.887	1191.7	107.812	4.66872	2.16091	1619.19	154.887
4SMST778-264	0.0998048	4.07556	3.59724	5.50949	0.260985	3.79659	0.67309	0.0821796	19.1182	1494.88	50.6556	1548.92	43.8009	1620.45	75.8636	1596.31	295.596	7.74893	3.48893	1620.45	75.8636
4SMST778-311	0.099875	2.80864	4.18072	4.68799	0.302872	3.69207	0.800773	0.0871219	5.55654	1705.53	55.3293	1670.25	38.4313	1621.76	52.2721	1688.4	90.2062	-5.16579	-2.11251	1621.76	52.2721
4SMST778-011	0.100001	6.20616	3.57974	9.2579	0.259318	6.87613	0.742033	0.0694428	7.99042	1486.35	91.2827	1545.05	73.6059	1624.1	115.469	1357	105.143	8.48165	3.79907	1624.1	115.469
4SMST778-348	0.10005	7.21319	3.82338	10.8935	0.276577	8.25886	0.749416	0.0561838	13.0592	1574.1	115.36	1597.68	87.8973	1625.01	134.19	1104.85	140.901	3.13282	1.47585	1625.01	134.19
4SMST778-387	0.100125	3.36899	3.3158	4.65667	0.240084	3.33524	0.690818	0.0814511	5.33144	1387.14	41.6259	1484.78	36.3428	1626.42	62.6636	1582.69	81.3246	14.7121	6.5762	1626.42	62.6636
4SMST778-220	0.100165	6.75743	3.59025	9.44623	0.259779	6.42785	0.699004	0.404025	75.4649	1488.71	85.4514	1547.38	75.1569	1627.14	125.677	6858.88	4948.48	8.50768	3.79132	1627.14	125.677
4SMST778-376	0.100172	5.80092	3.64405	8.44537	0.263567	6.19262	0.726804	0.0904485	6.52912	1508.07	83.2742	1559.21	67.3865	1627.27	107.886	1750.16	109.76	7.32542	3.28	1627.27	107.886
4SMST778-369	0.100353	8.13287	3.17872	13.763	0.229412	11.1154	0.80673	0.00568599	36.9294	1331.41	133.728	1452	106.696	1630.64	151.191	114.601	42.2458	18.35	8.30498	1630.64	151.191
4SMST778-238	0.100473	7.47628	3.33989	12.1707	0.240844	9.74327	0.789167	0.0307626	13.3326	1391.08	121.925	1490.43	95.3837	1632.85	138.946	612.409	80.5856	14.8066	6.66558	1632.85	138.946
4SMST778-360	0.100547	4.87172	4.20636	7.01511	0.302876	5.23516	0.72001	0.0801473	4.99185	1705.55	78.4568	1675.26	57.6106	1634.22	90.5244	1558.31	75.0045	-4.36478	-1.80807	1634.22	90.5244
4SMST778-053	0.100635	5.94937	4.11755	9.04243	0.29643	6.78964	0.753073	0.0887858	6.41902	1673.58	100.086	1657.79	74.0048	1635.84	110.526	1719.32	106.078	-2.3073	-0.952607	1635.84	110.526
[truncated: 308 more rows]
